# Supplementary material for: Chiral π–Cu( ii )-catalyzed site-, exo / endo -, and enantioselective dearomative (3 + 2) cycloadditions of isoquinolinium ylides with enamides, dienamides, and a trienamide
Source: Royal Society of Chemistry journal article supplement (doi:10.1039/d4sc02946a), 2024-01-01
Supplement: d4sc02946a1.pdf [file d4sc02946a1.pdf]

## Supplementary Information

### Chiral $\pi$ -Cu(II)-catalyzed Site-, *Exo/Endo*-, and Enantioselective Dearomative [3+2] Cycloadditions of Isoquinolinium Ylides with Enamides, Dienamides and a Trienamide

Weiwei Guo, Jianhao Huang, and Kazuaki Ishihara\*

Graduate School of Engineering, Nagoya University, Furo-cho, Chikusa-ku, Nagoya 464-8603, Japan

#### Table of Contents

|                                                                                                                                                    |     |
|----------------------------------------------------------------------------------------------------------------------------------------------------|-----|
| 1. General Methods.....                                                                                                                            | S2  |
| 2. Preparation of Ligands.....                                                                                                                     | S2  |
| 3. Preparation of 2 and 4.....                                                                                                                     | S3  |
| 4. General Procedure for the Dearomative [3+2] Cycloaddition Reactions of 1 with 2 or 4 (Using L5, Tables 2–5) .....                               | S5  |
| 5. General Procedure for the Remote Asymmetric Dearomative [3+2] Cycloaddition Reactions of 1b, 1d and 1g with 2a and 2c (Using L7, Table 5) ..... | S5  |
| 6. The Corresponding Physical and Spectroscopic Data of Products 3, 5 and 6.....                                                                   | S6  |
| 7. Synthetic Transformation of 3am (Scheme 3).....                                                                                                 | S19 |
| 8. General Procedure for the Remote Asymmetric Dearomative [3+2] Cycloaddition Reactions of 1a with 9a.....                                        | S20 |
| 9. NOE Analysis of 6aa, 6ab and 6ac.....                                                                                                           | S22 |
| 10. X-ray Diffraction Analysis of (1 <i>R</i> ,2 <i>S</i> ,10 <i>bR</i> )-3de (Fig. 1).....                                                        | S22 |
| 11. HOMO of 1a and LUMO of 4a.....                                                                                                                 | S24 |
| 12. References.....                                                                                                                                | S38 |
| 13. NMR Spectra and HPLC Charts .....                                                                                                              | S39 |

## 1. General Methods

IR spectra were recorded on a JASCO FT/IR-460 plus spectrometer.  $^1\text{H}$  spectra were measured on a JEOL ECS-400 spectrometer (400 MHz) at ambient temperature. Chemical shifts are reported in ppm from  $\text{Me}_4\text{Si}$  resonance (0.00 ppm) as an internal standard for  $\text{CDCl}_3$ . Data were recorded as follows: chemical shift, multiplicity (s = singlet; d = doublet; t = triplet; q = quartet; m = multiplet, br = broad), coupling constant (Hz), and integration.  $^{13}\text{C}$  NMR spectra were measured on a JEOL ECS-400 (100 MHz).  $^{19}\text{F}$  NMR spectra were measured on a JEOL ECS-400 spectrometer (376 MHz). Chemical shifts were recorded in ppm from the solvent resonance employed as the internal standard ( $\text{CDCl}_3$ : 77.10 ppm). High-performance liquid chromatography (HPLC) analysis was conducted using Shimadzu LC-10 AD coupled diode array-detector SPD-MA-10A-VP and chiral column of Daicel CHIRALCEL OD-3 (4.6 mm  $\times$  25 cm), Daicel CHIRALCEL AD-3 (4.6 mm  $\times$  25 cm), Daicel CHIRALCEL IA-3 (4.6 mm  $\times$  25 cm), Daicel CHIRALCEL IC-3 (4.6 mm  $\times$  25 cm), Daicel CHIRALCEL AS-3 (4.6 mm  $\times$  25 cm). Optical rotations were measured on Rudolph Autopol IV digital polarimeter. For Thin-layer chromatography TLC analysis, Merck precoated TLC plates (silica gel 60 F<sub>254</sub> 0.25 mm) or silica gel 60 NH<sub>2</sub> F<sub>254s</sub> 0.20 mm) were used. The products were purified by column chromatography on silica gel (E. Merck Art. 9385; Kanto Chemical Co., Inc. 37560; Fuji Silysia Chemical Ltd. Chromatorex<sup>®</sup> NH-DM1020). X-ray diffraction analysis was performed by Rigaku PILATUS-200K. High resolution mass spectral analysis (HRMS) was performed at Chemical Instrument Facility, Nagoya University. Dry dichloromethane was purchased from Kanto as the “anhydrous” and stored under nitrogen. Dry acetonitrile was distilled from  $\text{CaH}_2$  and dried over 4A molecular sieves. The isoquinolinium ylides were synthesized according to the procedure described in the literature.<sup>8c</sup> Other materials were obtained from commercial supplies and used without further purification.

## 2. Preparation of Ligands.

The ligands **L1–L7** were prepared according to the procedures described in the literatures.<sup>7f,1</sup>

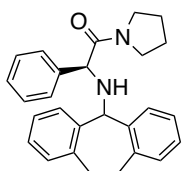

**(S)-(+)-2-((10,11-dihydro-5H-dibenzo[a,d][7]annulen-5-yl)amino)-2-phenyl-1-**

**(pyrrolidin-1-yl)ethan-1-one (L7):** White solid;  $[\alpha]_D^{26} +92.4$  (*c* 0.90,  $\text{CHCl}_3$ );  $^1\text{H}$  NMR (400 MHz,  $\text{CDCl}_3$ )  $\delta$  7.35–7.24 (m, 3H), 7.24–7.00 (m, 10H), 4.77 (s, 1H), 4.13 (s, 2H), 3.80–3.59 (m, 2H), 3.54–3.42 (m, 1H), 3.08–2.65 (m, 5H), 1.92–1.64 (m, 4H);  $^{13}\text{C}$  NMR (100 MHz,  $\text{CDCl}_3$ )  $\delta$  170.6, 130.8, 130.2, 128.7, 128.1, 127.9, 127.7, 127.5, 125.9, 125.7, 61.7, 46.0, 45.7, 33.0, 32.1, 26.0, 24.2; **HRMS** ( $\text{FAB}^+$ ) *m/z*:  $[\text{M}+\text{H}]^+$  calcd for  $\text{C}_{27}\text{H}_{29}\text{N}_2\text{O}$  397.2274; found 397.2279.



### 3. Preparation of 2 and 4

**2g**, **2h**, **2p–2s**, **4b–4c** and **7a** were prepared based on the procedures described in the literatures:<sup>2d,7a,12</sup>

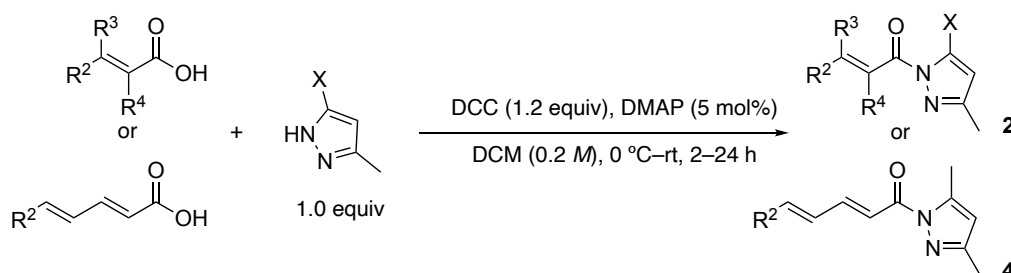

Pyrazole (5 mmol) and carboxylic acid (1.2 equiv, 6 mmol) were dissolved in CH<sub>2</sub>Cl<sub>2</sub> (0.2 M) at 0 °C. Then the DCC (6 mmol) and DMAP (0.05 mmol) were added. After stirring for 10 min, the reaction mixture was then moved to room temperature and stirred for several hours until the pyrazole was fully consumed (monitored by TLC). The reaction mixture was filtered, and the filtration was then concentrated *in vacuo*. Then the resultant mixture was purified by silica gel column chromatography (Hexane/EA = 25:1 to 10:1) to give **2**, **4** and **7**.

The corresponding physical and spectroscopic data for **2g**, **2h**, **2p–2s**, **4b–4c** and **7a** are as follows.

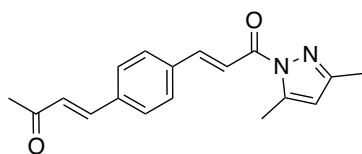

**(E)-4-(4-((E)-3-(3,5-Dimethyl-1H-pyrazol-1-yl)-3-oxoprop-1-en-1-yl)phenyl)but-3-en-2-one (2g)**: White solid; <sup>1</sup>H NMR (400 MHz, CDCl<sub>3</sub>) δ 7.99 (d, *J* = 16.4 Hz, 1H), 7.87 (d, *J* = 16.0 Hz, 1H), 7.70 (d, *J* = 8.8 Hz, 2H), 7.59 (d, *J* = 8.4 Hz, 2H), 7.51 (d, *J* = 16.4 Hz, 1H), 6.76 (d, *J* = 16.0 Hz, 1H) 6.03 (s, 1H), 2.63 (s, 3H), 2.41 (s, 3H), 2.30 (s, 3H); <sup>13</sup>C NMR (100 MHz, CDCl<sub>3</sub>) δ 198.3, 165.2, 152.2, 144.8, 144.5, 142.3, 136.8, 136.5, 129.3, 128.7, 128.0, 119.3, 111.7, 27.8, 14.8, 13.9; HRMS (ESI<sup>+</sup>) calcd for C<sub>18</sub>H<sub>18</sub>N<sub>2</sub>NaO<sub>2</sub> [M+Na]<sup>+</sup> 317.1260; found 317.1236.

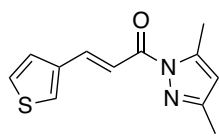

**(E)-1-(3,5-Dimethyl-1H-pyrazol-1-yl)-3-(thiophen-3-yl)prop-2-en-1-one (2h)**: White solid; <sup>1</sup>H NMR (400 MHz, CDCl<sub>3</sub>) δ 7.89 (d, *J* = 16.0 Hz, 1H), 7.74 (d, *J* = 16.0, 1H), 7.61 (d, *J* = 2.8 Hz, 1H), 7.48 (d, *J* = 4.4 Hz, 1H), 7.38–7.31 (m, 1H), 6.01 (s, 1H), 2.62 (s, 3H), 2.29 (s, 3H); <sup>13</sup>C NMR (100 MHz, CDCl<sub>3</sub>) δ 165.8, 151.9, 144.5, 139.6, 138.2, 129.2, 126.9, 125.9, 117.6, 111.5, 14.8, 13.9; HRMS (ESI<sup>+</sup>) calcd for [M+H]<sup>+</sup>C<sub>12</sub>H<sub>13</sub>N<sub>2</sub>OS 233.0743; found 233.0724.

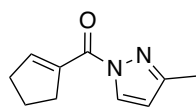

**Cyclopent-1-en-1-yl(3-methyl-1H-pyrazol-1-yl)methanone (2p)**: Colorless oil; <sup>1</sup>H NMR (400 MHz, CDCl<sub>3</sub>) δ 8.21 (d, *J* = 2.8 Hz, 1H), 7.47–7.42(m, 1H), 6.25 (d, *J* = 2.8 Hz, 1H),

2.88–2.79 (m, 2H), 2.71–2.62 (m, 2H), 2.34 (s, 3H), 2.23–1.92 (m, 2H);  $^{13}\text{C}$  NMR (100 MHz,  $\text{CDCl}_3$ )  $\delta$  167.8, 152.9, 144.6, 111.8, 76.1, 72.6, 27.5, 14.5, 13.9; HRMS (ESI+) calcd for  $\text{C}_{10}\text{H}_{12}\text{N}_2\text{NaO}$   $[\text{M}+\text{Na}]^+$  199.0842; found 199.0826.

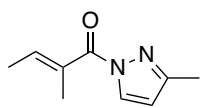

**(E)-2-Methyl-1-(3-methyl-1H-pyrazol-1-yl)but-2-en-1-one (2q):** Colorless oil;  $^1\text{H}$

NMR (400 MHz,  $\text{CDCl}_3$ )  $\delta$  8.14 (d,  $J = 2.8$  Hz, 1H), 6.81–6.72(m, 1H), 6.24 (d,  $J = 2.8$  Hz, 1H), 2.33 (s, 3H), 2.04 (m, 3H), 1.91 (dd,  $J = 1.0, 7.0$  Hz, 3H);  $^{13}\text{C}$  NMR (100 MHz,  $\text{CDCl}_3$ )  $\delta$  168.1, 153.7, 140.3, 131.1, 130.4, 109.6, 14.7, 14.1, 13.9; HRMS (ESI+) calcd for  $\text{C}_{19}\text{H}_{12}\text{N}_2\text{NaO}$   $[\text{M}+\text{Na}]^+$  187.0842; found 187.0820.

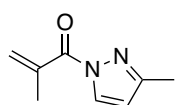

**2-Methyl-1-(3-methyl-1H-pyrazol-1-yl)prop-2-en-1-one (2r):** Colorless oil;  $^1\text{H}$

NMR (400 MHz,  $\text{CDCl}_3$ )  $\delta$  8.17 (d,  $J = 2.8$  Hz, 1H), 6.28 (d,  $J = 2.8$  Hz, 1H), 6.04 (m, 1H), 5.85 (m, 1H), 2.23 (s, 3H), 2.16 (d,  $J = 2.8$  Hz, 3H);  $^{13}\text{C}$  NMR (100 MHz,  $\text{CDCl}_3$ )  $\delta$  167.3, 154.3, 137.6, 130.8, 127.1, 110.2, 20.2, 14.1; HRMS (ESI+) calcd for  $\text{C}_8\text{H}_{10}\text{N}_2\text{NaO}$   $[\text{M}+\text{Na}]^+$  173.0685; found 173.0685.

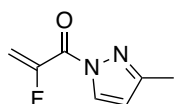

**2-Fluoro-1-(3-methyl-1H-pyrazol-1-yl)prop-2-en-1-one (2s):** Colorless oil;  $^1\text{H}$  NMR

(400 MHz,  $\text{CDCl}_3$ )  $\delta$  8.24 (d,  $J = 2.8$  Hz, 1H), 6.44 (dd,  $J = 3.8$  Hz, 46.6 Hz, 1H), 6.32 (d,  $J = 3.2$  Hz, 1H), 5.74 (dd,  $J = 3.6$  Hz, 16.4 Hz, 1H), 2.35 (s, 3H);  $^{13}\text{C}$  NMR (100 MHz,  $\text{CDCl}_3$ )  $\delta$  157.5 (d,  $J = 35.3$  Hz, 1C), 155.5, 143.5 (d,  $J = 255.6$  Hz, 1C), 131.4 (d,  $J = 2.9$  Hz, 1C), 111.1, 108.5 (d,  $J = 18.3$  Hz, 1C), 14;  $^{19}\text{F}$  NMR (376 MHz,  $\text{CDCl}_3$ )  $\delta$  -110.4; HRMS (ESI+) calcd for  $\text{C}_{10}\text{H}_{12}\text{N}_2\text{NaO}$   $[\text{M}+\text{Na}]^+$  199.0842; found 199.0826.

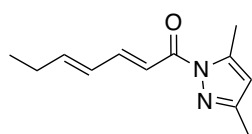

**(2E,4E)-1-(3,5-Dimethyl-1H-pyrazol-1-yl)hepta-2,4-dien-1-one (4b):**

Colorless oil;  $^1\text{H}$  NMR (400 MHz,  $\text{CDCl}_3$ )  $\delta$  7.49 (dd,  $J = 10.0, 15.2$  Hz, 1H), 7.26 (d,  $J = 15.6$  Hz, 1H), 6.42–6.23 (m, 2H), 5.98 (s, 1H), 2.58 (s, 3H), 2.26 (s, 3H), 2.26–2.19 (m, 2H), 1.07 (t,  $J = 7.6$  Hz, 3H);  $^{13}\text{C}$  NMR (100 MHz,  $\text{CDCl}_3$ )  $\delta$  165.9, 151.7, 147.6, 147.0, 144.4, 128.2, 119.0, 111.2, 26.2, 14.7, 13.9, 12.9; HRMS (ESI+) calcd for  $\text{C}_{12}\text{H}_{17}\text{N}_2\text{O}$   $[\text{M}+\text{H}]^+$  205.1335; found 205.1343.

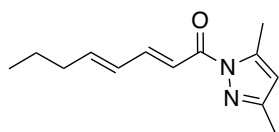

**(2E,4E)-1-(3,5-Dimethyl-1H-pyrazol-1-yl)octa-2,4-dien-1-one (4c):**

Colorless oil;  $^1\text{H}$  NMR (400 MHz,  $\text{CDCl}_3$ )  $\delta$  7.49 (dd,  $J = 10.6, 15.4$  Hz, 1H), 7.29–7.26 (m, 1H), 6.35 (dd,  $J = 10.4, 15.2$  Hz, 1H), 6.29–6.20 (m, 1H), 5.98 (s, 1H), 2.59 (s, 3H), 2.26 (s, 3H), 2.23–

2.13 (m, 2H), 1.52–1.42 (m, 2H), 0.93 (t,  $J = 7.4$  Hz, 3H);  $^{13}\text{C}$  NMR (100 MHz,  $\text{CDCl}_3$ )  $\delta$  165.9, 151.7, 146.9, 146.1, 144.3, 129.3, 119.0, 111.2, 32.2, 21.9, 14.7, 13.9, 13.8; HRMS (ESI+) calcd for  $\text{C}_{13}\text{H}_{19}\text{N}_2\text{O}$   $[\text{M}+\text{H}]^+$  219.1492; found 219.1455.

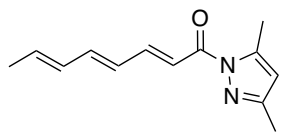

(2*E*,4*E*,6*E*)-1-(3,5-Dimethyl-1*H*-pyrazol-1-yl)octa-2,4,6-trien-1-one (**9a**):

White solid;  $^1\text{H}$  NMR (400 MHz,  $\text{CDCl}_3$ )  $\delta$  7.52 (dd,  $J = 11.4, 15.0$  Hz, 1H), 7.31 (d,  $J = 15.6$  Hz, 1H), 6.62 (dd,  $J = 10.6, 15.0$  Hz, 1H), 6.38 (dd,  $J = 11.0, 15.0$  Hz, 1H), 6.26–6.14 (m, 1H), 6.05–5.92 (m, 2H), 2.59 (s, 3H), 2.26 (s, 3H), 1.85 (d,  $J = 7.2$  Hz, 3H);  $^{13}\text{C}$  NMR (100 MHz,  $\text{CDCl}_3$ )  $\delta$  165.7, 151.7, 146.6, 144.3, 142.4, 135.9, 131.5, 128.4, 119.8, 111.3, 18.7, 14.7, 13.9; HRMS (ESI+) calcd for  $\text{C}_{13}\text{H}_{17}\text{N}_2\text{O}$   $[\text{M}+\text{H}]^+$  217.1335; found 217.1341.

#### 4. General Procedure for the Dearomative [3+2] Cycloaddition Reactions of **1** with **2** or **4** (Using **L5**, Tables 2–5)

A mixture of monopeptide ligand **L5** (11 mol%), copper(II) triflate (10 mol%) and activated molecular sieves 4A (150–200 mg) were dissolved in anhydrous acetonitrile (1.0 mL). After stirring for 15 min at ambient temperature, the solution was concentrated under reduced pressure. The resultant residue was diluted with  $\text{CH}_2\text{Cl}_2$  (1.3 mL) and cooled to  $-10^\circ\text{C}$  ( $-40^\circ\text{C}$  for **3ai**, **3am** and **3an**). Isoquinolinium ylides **1** (0.22 mmol, 1.1 equiv) and **2** or **4** (0.2 mmol) were then added and the reaction mixture was stirred at the same temperature for 6–48 h. The reaction was quenched with a few drops of triethylamine and then passed through a short pad silica gel to remove ligand and copper. After evaporation of the filtrate under reduced pressure, the crude product was then purified by column chromatography on silica gel (hexane–EtOAc = 10:1 to 3:1) to give **3**, **5** and **6**.

#### 5. General Procedure for the Remote Asymmetric Dearomative [3+2] Cycloaddition Reactions of **1b**, **1d** and **1g** with **2a** and **2c** (Using **L7**, Table 5)

A mixture of monopeptide ligand **L7** (11 mol%), copper(II) triflate (10 mol%) and activated molecular sieves 4A (150–200 mg) were dissolved in anhydrous acetonitrile (1.0 mL). After stirring for 15 min at ambient temperature, the solution was concentrated under reduced pressure. The resultant residue was diluted with  $\text{CH}_2\text{Cl}_2$  (1.3 mL) and cooled to  $-15^\circ\text{C}$ . Isoquinolinium ylides **1** (0.22 mmol, 1.1 equiv) and **2** or **4** (0.2 mmol) were then added. After stirring at the same temperature for 24 h, the reaction was then moved to  $-10^\circ\text{C}$  for another 24 h. The reaction was quenched with a few drops of triethylamine and then passed through a short pad silica gel to remove ligand and copper. After evaporation of the filtrate under reduced pressure, the crude product was then purified by column chromatography on silica gel (hexane–EtOAc = 10:1 to 3:1) to give the target products.

## 6. The Corresponding Physical and Spectroscopic Data of Products 3, 5 and 6

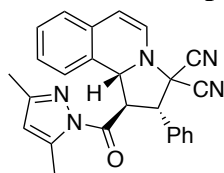

**(1R,2S,10bR)-(+)-1-(3,5-Dimethyl-1H-pyrazole-1-carbonyl)-2-phenyl-1,10b-**

**dihydropyrrolo[2,1-a]isoquinoline-3,3(2H)-dicarbonitrile (3aa) (Table 2):** 98% yield; Yellow foam;  $[\alpha]_D^{31} +576.7$  (98% ee,  $c$  0.80,  $\text{CHCl}_3$ );  $^1\text{H NMR}$  (400 MHz,  $\text{CDCl}_3$ )  $\delta$  7.67–7.58 (m, 2H), 7.39–7.34 (m, 3H), 7.21 (t,  $J = 7.4$  Hz, 1H), 7.14–7.02 (m, 2H), 6.86 (d,  $J = 8.0$  Hz, 1H), 6.40 (d,  $J = 7.2$  Hz, 1H), 6.03–5.98 (m, 2H), 5.74 (dd,  $J = 8.8, 11.2$  Hz, 1H), 5.47 (d,  $J = 8.8$  Hz, 1H), 4.53 (d,  $J = 10.8$  Hz, 1H), 2.49 (s, 3H), 2.23 (s, 3H);  $^{13}\text{C NMR}$  (100 MHz,  $\text{CDCl}_3$ )  $\delta$  170.6, 153.5, 144.7, 131.2, 130.1, 129.9, 129.3, 129.0, 128.4, 127.8, 127.0, 125.1, 124.3, 113.2, 112.9, 112.1, 110.7, 63.5, 61.9, 59.5, 50.1, 14.5, 13.8; **HRMS** (ESI+) calcd for  $\text{C}_{26}\text{H}_{21}\text{N}_5\text{NaO}$   $[\text{M}+\text{Na}]^+$  442.1633, found 442.1632; The ee was determined by **HPLC** analysis (Daicel Chiralcel OD-3 column, hexane-*i*-PrOH = 98: 2, flow rate = 1.0 mL/min)  $t_R = 9.9$  (major enantiomer), 11.8 (minor) min.

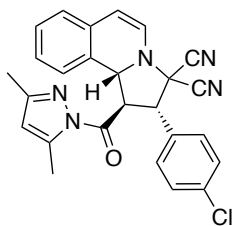

**(1R,2S,10bR)-(+)-2-(4-chlorophenyl)-1-(3,5-dimethyl-1H-pyrazole-1-**

**carbonyl)-1,10b-dihydropyrrolo[2,1-a]isoquinoline-3,3(2H)-dicarbonitrile (3ab) (Table 2):** 95% yield; Yellow form;  $[\alpha]_D^{30} +572.4$  (>98% ee,  $c$  0.92,  $\text{CHCl}_3$ );  $^1\text{H NMR}$  (400 MHz,  $\text{CDCl}_3$ )  $\delta$  7.56 (d,  $J = 8.8$  Hz, 2H), 7.34 (d,  $J = 8.8$  Hz, 2H), 7.21 (t,  $J = 7.4$  Hz, 1H), 7.14–7.02 (m, 2H), 6.82 (d,  $J = 7.2$  Hz, 1H), 6.39 (d,  $J = 7.2$  Hz, 1H), 6.03 (s, 1H), 6.01 (d,  $J = 7.2$  Hz, 1H), 5.69 (dd,  $J = 8.8, 11.2$  Hz, 1H), 5.46 (d,  $J = 8.4$  Hz, 1H), 4.48 (d,  $J = 10.8$  Hz, 1H), 2.50 (s, 3H), 2.23 (s, 3H);  $^{13}\text{C NMR}$  (100 MHz,  $\text{CDCl}_3$ )  $\delta$  170.3, 153.7, 144.8, 136.1, 131.1, 130.7, 129.3, 128.9, 128.5, 127.9, 126.8, 125.2, 124.2, 113.0, 112.9, 119.5, 110.9, 63.4, 61.7, 58.9, 50.1, 14.5, 13.9; **HRMS** (ESI+) calcd for  $\text{C}_{26}\text{H}_{20}\text{ClKN}_5\text{O}$   $[\text{M}+\text{K}]^+$  492.0988, found 492.0932; The ee was determined by **HPLC** analysis (Daicel Chiralcel AD-3 column, hexane-*i*-PrOH = 98.4: 1.6, flow rate = 1.0 mL/min)  $t_R = 21.2$  (major enantiomer), 30.7 (minor) min.

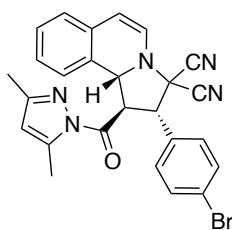

**(1R,2S,10bR)-(+)-2-(4-Bromophenyl)-1-(3,5-dimethyl-1H-pyrazole-1-**

**carbonyl)-1,10b-dihydropyrrolo[2,1-a]isoquinoline-3,3(2H)-dicarbonitrile (3ac) (Table 2):** 94%

yield; Yellow foam;  $[\alpha]^{29}_{\text{D}} +528.8$  (98% ee,  $c$  0.93,  $\text{CHCl}_3$ );  $^1\text{H NMR}$  (400 MHz,  $\text{CDCl}_3$ )  $\delta$  7.54–7.47 (m, 4H), 7.21 (t,  $J = 7.6$  Hz, 1H), 7.14–7.02 (m, 2H), 6.82 (d,  $J = 7.2$  Hz, 1H), 6.39 (dd,  $J = 1.8, 7.2$  Hz, 1H), 6.02 (s, 1H), 6.00 (d,  $J = 7.6$  Hz, 1H), 5.72–5.63 (m, 1H), 5.46 (d,  $J = 8.4$  Hz, 1H), 4.47 (dd,  $J = 1.8, 10.8$  Hz, 1H), 2.50 (s, 3H), 2.23 (s, 3H);  $^{13}\text{C NMR}$  (100 MHz,  $\text{CDCl}_3$ )  $\delta$  170.3, 153.7, 144.8, 132.2, 131.1, 130.0, 129.8, 128.9, 128.5, 127.9, 126.8, 125.2, 124.4, 124.2, 113.0, 112.9, 111.9, 110.9, 63.4, 61.6, 58.9, 50.0, 14.5, 13.9; **HRMS** (ESI+) calcd for  $\text{C}_{26}\text{H}_{20}\text{BrN}_5\text{NaO}$   $[\text{M}+\text{Na}]^+$  520.0743, found 520.0729; The ee was determined by **HPLC** analysis (Daicel Chiralcel OD-3 column, hexane-*i*-PrOH = 98: 2, flow rate = 1.0 mL/min)  $t_{\text{R}} = 12.8$  (major enantiomer), 15.1 (minor) min.

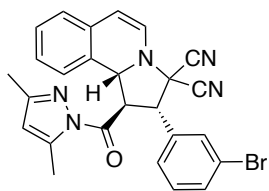

**(1R,2S,10bR)-(+)-2-(3-Bromophenyl)-1-(3,5-dimethyl-1H-pyrazole-1-carbonyl)-1,10b-dihydropyrrolo[2,1-a]isoquinoline-3,3(2H)-dicarbonitrile (3ad)** (Table 2): 95% yield; Yellow foam;  $[\alpha]^{27}_{\text{D}} +518.1$  (98% ee,  $c$  0.68,  $\text{CHCl}_3$ );  $^1\text{H NMR}$  (400 MHz,  $\text{CDCl}_3$ )  $\delta$  7.91–7.84 (m, 1H), 7.56–7.45 (m, 2H), 7.28–7.18 (m, 2H), 7.14–7.03 (m, 2H), 6.81 (d,  $J = 7.2$  Hz, 1H), 6.39 (d,  $J = 7.2$  Hz, 1H), 6.06–5.98 (m, 2H), 5.70 (dd,  $J = 8.8, 11.2$  Hz, 1H), 5.48 (d,  $J = 8.8$  Hz, 1H), 4.45 (d,  $J = 11.2$  Hz, 1H), 2.50 (s, 3H), 2.27 (s, 3H);  $^{13}\text{C NMR}$  (100 MHz,  $\text{CDCl}_3$ )  $\delta$  170.2, 153.8, 144.8, 133.1, 133.0, 132.4, 131.1, 130.5, 128.9, 128.5, 128.1, 128.0, 126.8, 125.2, 124.1, 123.0, 113.1, 112.9, 111.8, 111.0, 63.3, 61.7, 58.8, 50.0, 14.5, 13.9; **HRMS** (ESI+) calcd for  $\text{C}_{26}\text{H}_{20}\text{BrN}_5\text{NaO}$   $[\text{M}+\text{Na}]^+$  520.0743, found 520.0746; The ee was determined by **HPLC** analysis (Daicel Chiralcel OD-3 column, hexane-*i*-PrOH = 98: 2, flow rate = 1.0 mL/min)  $t_{\text{R}} = 11.0$  (major enantiomer), 14.7 (minor) min.

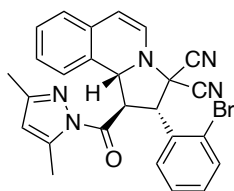

**(1R,2S,10bR)-(+)-2-(2-Bromophenyl)-1-(3,5-dimethyl-1H-pyrazole-1-carbonyl)-1,10b-dihydropyrrolo[2,1-a]isoquinoline-3,3(2H)-dicarbonitrile (3ae)** (Table 2): 80% yield; Yellow foam;  $[\alpha]^{28}_{\text{D}} +185.6$  (94% ee,  $c$  0.67,  $\text{CHCl}_3$ );  $^1\text{H NMR}$  (400 MHz,  $\text{CDCl}_3$ )  $\delta$  7.69 (dd,  $J = 1.6, 8.0$  Hz, 1H), 7.61 (dd,  $J = 1.0, 7.8$  Hz, 1H), 7.38–7.30 (m, 1H), 7.29–7.19 (m, 2H), 7.18–6.09 (m, 2H), 6.88 (d,  $J = 8.0$  Hz, 1H), 6.48 (d,  $J = 7.6$  Hz, 1H), 6.04 (d,  $J = 7.6$  Hz, 1H), 5.98 (d,  $J = 1.2$  Hz, 1H), 5.43 (d,  $J = 8.8$  Hz, 1H), 5.29 (t,  $J = 8.4$  Hz, 1H), 5.13 (d,  $J = 8.4$  Hz, 1H), 2.55 (s, 3H), 2.04 (s, 3H);  $^{13}\text{C NMR}$  (100 MHz,  $\text{CDCl}_3$ )  $\delta$  170.1, 153.3, 144.6, 134.0, 133.1, 131.5, 130.8, 129.9, 129.5, 128.5, 128.0, 127.8, 126.2, 125.1, 124.1, 112.8, 112.5, 111.5, 110.9, 62.4, 59.6, 57.2, 51.9, 14.4, 13.6; **HRMS** (ESI+) calcd for  $\text{C}_{26}\text{H}_{20}\text{BrN}_5\text{NaO}$   $[\text{M}+\text{Na}]^+$  520.0743, found 520.0758; The ee was determined by **HPLC** analysis (Daicel Chiralcel AD-3 column, hexane-*i*-PrOH = 98.4: 1.6, flow rate = 1.0 mL/min)  $t_{\text{R}} = 17.1$  (major enantiomer), 24.8 (minor) min.

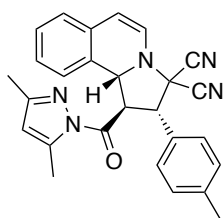

**(1R,2S,10bR)-(+)-1-(3,5-Dimethyl-1H-pyrazole-1-carbonyl)-2-(p-tolyl)-1,10b-**

**dihydropyrrolo[2,1-a]isoquinoline-3,3(2H)-dicarbonitrile (3af) (Table 2):** 96% yield; Yellow form;  $[\alpha]_D^{29} +568.4$  (96% ee,  $c$  0.83,  $\text{CHCl}_3$ );  $^1\text{H NMR}$  (400 MHz,  $\text{CDCl}_3$ )  $\delta$  7.50 (d,  $J = 8.0$  Hz, 2H), 7.23–7.12 (m, 3H), 7.13–7.01 (m, 2H), 6.85 (d,  $J = 7.6$  Hz, 1H), 6.39 (d,  $J = 7.2$  Hz, 1H), 6.00 (s, 1H), 5.98 (d,  $J = 7.2$  Hz, 1H), 5.75 (dd,  $J = 8.8, 11.2$  Hz, 1H), 5.46 (d,  $J = 8.8$  Hz, 1H), 4.52 (d,  $J = 11.6$  Hz, 1H), 2.49 (s, 3H), 2.32 (s, 3H); 2.25 (s, 3H);  $^{13}\text{C NMR}$  (100 MHz,  $\text{CDCl}_3$ )  $\delta$  170.7, 153.4, 144.7, 139.9, 131.2, 129.7, 129.2, 129.0, 128.3, 127.8, 127.5, 127.0, 125.0, 124.3, 113.2, 112.9, 112.2, 110.5, 63.6, 62.1, 59.3, 49.9, 21.3, 14.5, 13.9; **HRMS** (ESI+) calcd for  $\text{C}_{27}\text{H}_{24}\text{N}_5\text{O}$   $[\text{M}+\text{H}]^+$  434.1975, found 434.1977; The ee was determined by **HPLC** analysis (Daicel Chiralcel IC-3 column, hexane-*i*-PrOH = 98: 2, flow rate = 1.0 mL/min)  $t_R = 14.9$  (major enantiomer), 21.7 (minor) min.

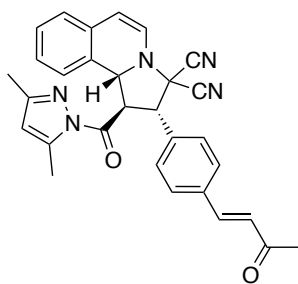

**(1R,2S,10bR)-(+)-1-(3,5-Dimethyl-1H-pyrazole-1-carbonyl)-2-(4-((E)-3-**

**oxobut-1-en-1-yl)phenyl)-1,10b-dihydropyrrolo[2,1-a]isoquinoline-3,3(2H)-dicarbonitrile (3ag) (Table 2):** 95% yield; Yellow form;  $[\alpha]_D^{29} +582.6$  (99% ee,  $c$  0.77,  $\text{CHCl}_3$ );  $^1\text{H NMR}$  (400 MHz,  $\text{CDCl}_3$ )  $\delta$  7.65 (d,  $J = 8.0$  Hz, 2H), 7.54 (d,  $J = 8.8$  Hz, 2H), 7.54 (d,  $J = 8.8$  Hz, 2H), 7.46 (d,  $J = 16.8$  Hz, 1H), 7.22 (t,  $J = 7.6$  Hz, 1H), 7.15–7.03 (m, 2H), 6.85 (d,  $J = 8.0$  Hz, 1H), 6.70 (d,  $J = 16.0$  Hz, 1H), 6.40 (d,  $J = 7.2$  Hz, 1H), 6.05–5.98 (m, 2H), 5.71 (dd,  $J = 8.4, 10.8$  Hz, 1H), 5.47 (d,  $J = 8.4$  Hz, 1H), 4.53 (d,  $J = 10.8$  Hz, 1H), 2.50 (s, 3H), 2.37 (s, 3H); 2.22 (s, 3H);  $^{13}\text{C NMR}$  (100 MHz,  $\text{CDCl}_3$ )  $\delta$  198.2, 170.3, 153.6, 144.8, 142.1, 133.2, 131.1, 130.0, 129.0, 128.7, 128.5, 128.2, 127.9, 126.9, 125.2, 124.2, 113.0, 111.9, 111.0, 63.4, 61.6, 59.2, 50.2, 27.7, 14.5, 13.9; **HRMS** (ESI+) calcd for  $\text{C}_{30}\text{H}_{26}\text{N}_5\text{O}_2$   $[\text{M}+\text{H}]^+$  488.2081, found 488.2071; The ee was determined by **HPLC** analysis (Daicel Chiralcel OD-3 column, hexane-*i*-PrOH = 90: 10, flow rate = 1.0 mL/min)  $t_R = 23.3$  (major enantiomer), 30.1 (minor) min.

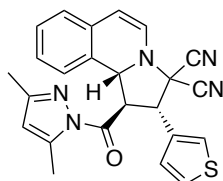

**(1R,2S,10bR)-(+)-1-(3,5-Dimethyl-1H-pyrazole-1-carbonyl)-2-(thiophen-3-yl)-**

**1,10b-dihydropyrrolo[2,1-a]isoquinoline-3,3(2H)-dicarbonitrile (3ah):** 96% yield; Yellow form;

$[\alpha]^{30}_{\text{D}} +556.2$  (99% ee,  $c$  0.79,  $\text{CHCl}_3$ );  $^1\text{H NMR}$  (400 MHz,  $\text{CDCl}_3$ )  $\delta$  7.70–7.63 (m, 1H), 7.39–7.29 (m, 2H), 7.19 (t,  $J = 7.4$  Hz, 1H), 7.12–7.01 (m, 2H), 6.84 (d,  $J = 8.0$  Hz, 1H), 6.38 (d,  $J = 7.2$  Hz, 1H), 6.05 (s, 1H), 5.99 (d,  $J = 7.2$  Hz, 1H), 5.71 (dd,  $J = 8.8, 11.2$  Hz, 1H), 5.44 (d,  $J = 8.4$  Hz, 1H), 4.69 (d,  $J = 11.6$  Hz, 1H), 2.52 (s, 3H), 2.28 (s, 3H);  $^{13}\text{C NMR}$  (100 MHz,  $\text{CDCl}_3$ )  $\delta$  170.5, 137.7, 144.9, 131.5, 131.1, 128.9, 128.4, 127.9, 127.4, 127.1, 126.8, 126.2, 125.1, 124.3, 113.2, 113.0, 112.2, 110.8, 63.6, 61.6, 55.0, 50.7, 14.6, 14.0; **HRMS** (ESI+) calcd for  $\text{C}_{24}\text{H}_{20}\text{N}_5\text{OS}$   $[\text{M}+\text{H}]^+$  426.1383, found 426.1362. The ee was determined by **HPLC** analysis (Daicel Chiralcel AD-3 column, hexane-*i*-PrOH = 98.4: 1.6, flow rate = 1.0 mL/min)  $t_{\text{R}} = 27.7$  (major enantiomer), 35.4 (minor) min.

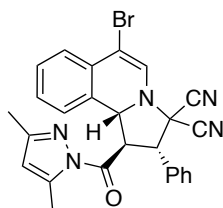

**(1R,2S,10bR)-(+)-6-Bromo-1-(3,5-dimethyl-1H-pyrazole-1-carbonyl)-2-phenyl-1,10b-dihydropyrrolo[2,1-a]isoquinoline-3,3(2H)-dicyanitrile (3ba) (Table 2):** 98% yield; Yellow form;  $[\alpha]^{30}_{\text{D}} +500.2$  (>99% ee,  $c$  0.92,  $\text{CHCl}_3$ );  $^1\text{H NMR}$  (400 MHz,  $\text{CDCl}_3$ )  $\delta$  7.65–7.55 (m, 2H), 7.54–7.47 (m, 2H), 7.43–7.29 (m, 4H), 7.26–7.16 (m, 1H), 6.98 (d,  $J = 7.2$  Hz, 1H), 6.77 (d,  $J = 3.6$  Hz, 1H), 6.00 (s, 1H), 5.82–5.72 (m, 1H), 5.50 (d,  $J = 8.4, 11.2$  Hz, 1H), 4.53 (dd,  $J = 4.0, 11.2$  Hz, 1H), 2.48 (s, 3H), 2.24 (s, 3H);  $^{13}\text{C NMR}$  (100 MHz,  $\text{CDCl}_3$ )  $\delta$  170.3, 153.7, 144.8, 130.2, 130.1, 129.8, 129.3, 129.1, 128.7, 127.6, 125.3, 124.2, 113.0, 112.5, 111.9, 106.4, 63.4, 61.5, 59.5, 49.9, 14.5, 13.9; **HRMS** (ESI+) calcd for  $\text{C}_{26}\text{H}_{20}\text{BrN}_5\text{NaO}$   $[\text{M}+\text{Na}]^+$  520.0743, found 520.0764; The ee was determined by **HPLC** analysis (Daicel Chiralcel AD-3 column, hexane-*i*-PrOH = 98.4: 1.6, flow rate = 1.0 mL/min)  $t_{\text{R}} = 14.4$  (major enantiomer), 25.3 (minor) min.

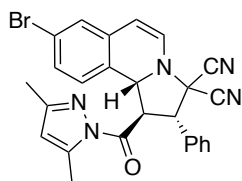

**(1R,2S,10bR)-(+)-8-Bromo-1-(3,5-dimethyl-1H-pyrazole-1-carbonyl)-2-phenyl-1,10b-dihydropyrrolo[2,1-a]isoquinoline-3,3(2H)-dicyanitrile (3ca) (Table 2):** 94% yield; Yellow form;  $[\alpha]^{30}_{\text{D}} +483.8$  (>99% ee,  $c$  0.80,  $\text{CHCl}_3$ );  $^1\text{H NMR}$  (400 MHz,  $\text{CDCl}_3$ )  $\delta$  7.65–7.56 (m, 2H), 7.42–7.35 (m, 3H), 7.25–7.18 (m, 2H), 6.76 (d,  $J = 8.0$  Hz, 1H), 6.44 (d,  $J = 7.6$  Hz, 1H), 6.01 (s, 1H), 5.92 (d,  $J = 7.2$  Hz, 1H), 5.73 (dd,  $J = 8.4, 11.2$  Hz, 1H), 5.39 (d,  $J = 8.4$  Hz, 1H), 4.53 (d,  $J = 11.6$  Hz, 1H), 2.48 (s, 3H), 2.24 (s, 3H);  $^{13}\text{C NMR}$  (100 MHz,  $\text{CDCl}_3$ )  $\delta$  170.2, 153.7, 144.8, 133.3, 130.5, 130.4, 130.0, 129.2, 129.1, 128.2, 127.7, 127.6, 126.0, 122.4, 113.0, 112.9, 111.9, 109.4, 63.2, 61.7, 59.5, 49.8, 14.5, 13.9; **HRMS** (ESI+) calcd for  $\text{C}_{26}\text{H}_{20}\text{BrN}_5\text{NaO}$   $[\text{M}+\text{Na}]^+$  520.0743, found 520.0774; The ee was determined by **HPLC** analysis (Daicel Chiralcel AD-3 column, hexane-*i*-PrOH = 98.4: 1.6, flow rate = 1.0 mL/min)  $t_{\text{R}} = 15.7$  (major enantiomer), 21.4 (minor) min.

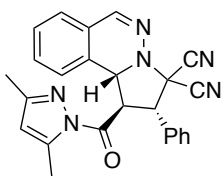

**(1R,2S,10bR)-(+)-1-(3,5-dimethyl-1H-pyrazole-1-carbonyl)-2-phenyl-1,10b-dihydropyrrolo[2,1-a]phthalazine-3,3(2H)-dicarbonitrile (3da) (Table 2):** 98% yield; White solid;  $[\alpha]^{30}_{\text{D}} +262.2$  (>99% ee,  $c$  0.79,  $\text{CHCl}_3$ );  $^1\text{H NMR}$  (400 MHz,  $\text{CDCl}_3$ )  $\delta$  7.82 (s, 1H), 7.46–7.32 (m, 8H), 7.07–7.00 (m, 1H), 6.01 (s, 1H), 5.21 (dd,  $J = 7.6, 9.2$  Hz, 1H), 5.09 (d,  $J = 8.4, 9.2$  Hz, 1H), 4.35 (d,  $J = 7.6$  Hz, 1H), 2.56 (d,  $J = 1.2$  Hz, 3H), 2.04 (s, 3H);  $^{13}\text{C NMR}$  (100 MHz,  $\text{CDCl}_3$ )  $\delta$  170.3, 153.4, 146.2, 144.7, 135.8, 132.7, 132.2, 129.4, 129.0, 128.9, 126.3, 125.3, 124.5, 123.9, 113.4, 112.7, 111.8, 62.3, 59.9, 57.9, 50.2, 14.4, 13.6; **HRMS** (ESI+) calcd for  $\text{C}_{25}\text{H}_{20}\text{N}_6\text{NaO}$   $[\text{M}+\text{Na}]^+$  443.1591, found 443.1602; The ee was determined by **HPLC** analysis (Daicel Chiralcel AD-3 column, hexane-*i*-PrOH = 95: 5, flow rate = 1.0 mL/min)  $t_{\text{R}} = 18.4$  (major enantiomer), 22.6 (minor) min.

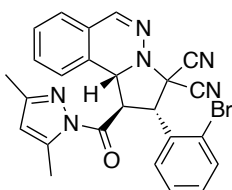

**(1R,2S,10bR)-(+)-2-(2-Bromophenyl)-1-(3,5-dimethyl-1H-pyrazole-1-carbonyl)-1,10b-dihydropyrrolo[2,1-a]phthalazine-3,3(2H)-dicarbonitrile (3de) (Table 2):** 97% yield; White solid;  $[\alpha]^{29}_{\text{D}} +116.2$  (98% ee,  $c$  0.75,  $\text{CHCl}_3$ );  $^1\text{H NMR}$  (400 MHz,  $\text{CDCl}_3$ )  $\delta$  7.88 (s, 1H), 7.62 (dd,  $J = 1.0, 8.2$  Hz, 1H), (dd,  $J = 1.4, 7.8$  Hz, 1H), 7.50–7.38 (m, 3H), 7.38–7.30 (m, 1H), 7.25–7.18 (m, 1H), 7.11–7.02 (m, 1H), 6.01 (s, 1H), 5.17–5.09 (m, 1H), 4.99–4.91 (m, 1H), 2.59 (s, 3H), 1.94 (s, 3H);  $^{13}\text{C NMR}$  (100 MHz,  $\text{CDCl}_3$ )  $\delta$  169.8, 153.5, 147.3, 144.7, 137.1, 133.3, 132.8, 132.3, 130.4, 129.2, 129.0, 128.3, 126.4, 126.0, 125.4, 123.8, 112.8, 112.5, 111.3, 61.3, 58.8, 55.6, 50.7, 14.3, 13.5; **HRMS** (ESI+) calcd for  $\text{C}_{25}\text{H}_{19}\text{BrN}_6\text{NaO}$   $[\text{M}+\text{Na}]^+$  521.0696, found 521.0712; The ee was determined by **HPLC** analysis (Daicel Chiralcel AD-3 column, hexane-*i*-PrOH = 90: 10, flow rate = 1.0 mL/min)  $t_{\text{R}} = 11.2$  (major enantiomer), 28.1 (minor) min.

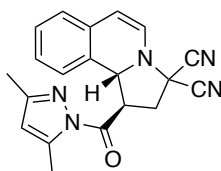

**(1R,10bR)-(+)-1-(3,5-Dimethyl-1H-pyrazole-1-carbonyl)-1,10b-dihydropyrrolo[2,1-a]isoquinoline-3,3(2H)-dicarbonitrile (3ai) (Table 2):** 98% yield; Yellow form;  $[\alpha]^{30}_{\text{D}} +92.3$  (>99% ee,  $c$  0.91,  $\text{CHCl}_3$ );  $^1\text{H NMR}$  (400 MHz,  $\text{CDCl}_3$ )  $\delta$  7.21 (t,  $J = 7.6$  Hz, 1H), 7.16–7.09 (m, 1H), 7.09–7.02 (m, 1H), 6.84 (d,  $J = 8.0$  Hz, 1H), 6.44 (d,  $J = 7.6$  Hz, 1H), 6.07 (d,  $J = 1.2$  Hz, 1H), 6.00 (d,  $J = 7.2$  Hz, 1H), 5.31 (d,  $J = 9.2$  Hz, 1H), 4.89 (q,  $J = 9.2$  Hz, 1H), 3.43 (dd,  $J = 9.4, 13.4$  Hz, 1H), 2.94 (dd,  $J = 9.4, 13.4$  Hz, 1H), 2.60 (s, 3H), 2.26 (s, 3H);  $^{13}\text{C NMR}$  (100 MHz,  $\text{CDCl}_3$ )  $\delta$  170.5, 153.8, 144.8, 131.2, 129.5, 128.3, 127.8, 127.6, 124.9, 124.4, 113.6, 113.4, 112.5,



110.9,61.3, 53.4, 46.6, 42.3, 36.0, 14.5, 14.0; **HRMS** (ESI+) calcd for C<sub>20</sub>H<sub>17</sub>N<sub>5</sub>NaO [M+Na]<sup>+</sup> 366.1325, found 366.1334; The ee was determined by **HPLC** analysis (Daicel Chiralcel AD-3 column, hexane-*i*-PrOH = 98.4: 1.6, flow rate = 1.0 mL/min) *t*<sub>R</sub> = 23.1 (minor enantiomer), 26.1 (major) min.

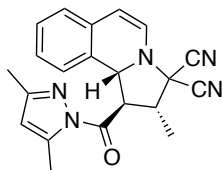

**(1R,2R,10bR)-(+)-1-(3,5-Dimethyl-1H-pyrazole-1-carbonyl)-2-methyl-1,10b-**

**dihydropyrrolo[2,1-*a*]isoquinoline-3,3(2H)-dicarbonitrile (3aj)** (Table 2): 97% yield; Yellow form; [α]<sup>30</sup><sub>D</sub> +460.1 (>99% ee, *c* 0.67, CHCl<sub>3</sub>); <sup>1</sup>H NMR (400 MHz, CDCl<sub>3</sub>) δ 7.17 (t, *J* = 7.4 Hz, 1H), 7.11–6.99 (m, 2H), 6.69 (d, *J* = 7.6 Hz, 1H), 6.38 (d, *J* = 7.2 Hz, 1H), 6.12 (s, 1H), 5.96 (d, *J* = 7.2 Hz, 1H), 5.38 (d, *J* = 8.8 Hz, 1H), 4.97 (q, *J* = 8.8, 10.4 Hz, 1H), 3.38–3.28 (m, 1H), 2.61 (s, 3H), 2.27 (s, 3H); 1.47 (d, *J* = 6.8 Hz, 3H); <sup>13</sup>C NMR (100 MHz, CDCl<sub>3</sub>) δ 170.8, 153.7, 144.8, 131.0, 129.2, 128.2, 127.8, 127.1, 124.9, 123.9, 113.2, 113.0, 112.1, 110.6, 63.0, 60.7, 52.7, 49.8, 14.6, 14.5, 14.0; **HRMS** (ESI+) calcd for C<sub>21</sub>H<sub>20</sub>N<sub>5</sub>O [M+H]<sup>+</sup> 358.1662, found 358.1649; The ee was determined by **HPLC** analysis (Daicel Chiralcel OD-3 column, hexane-*i*-PrOH = 98: 2, flow rate = 1.0 mL/min) *t*<sub>R</sub> = 9.2 (major enantiomer), 17.3 (minor) min.

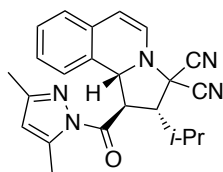

**(1R,2R,10bR)-(+)-1-(3,5-Dimethyl-1H-pyrazole-1-carbonyl)-2-isopropyl-**

**1,10b-dihydropyrrolo[2,1-*a*]isoquinoline-3,3(2H)-dicarbonitrile (3ak)** (Table 2): 86% yield; Yellow form; [α]<sup>27</sup><sub>D</sub> +262.9 (94% ee, *c* 0.87, CHCl<sub>3</sub>); <sup>1</sup>H NMR (400 MHz, CDCl<sub>3</sub>) δ 7.22–7.13 (m, 2H), 7.12–7.05 (m, 1H), 7.03 (d, *J* = 7.6 Hz, 1H), 6.42 (d, *J* = 7.2 Hz, 1H), 6.10 (s, 1H), 6.07 (d, *J* = 7.6 Hz, 1H), 5.14–5.06 (m, 2H), 3.39–3.29 (m, 1H), 2.58 (s, 3H), 2.31 (s, 3H), 2.29–2.18 (m, 1H), 1.22 (d, *J* = 6.4 Hz, 3H), 0.93 (d, *J* = 6.8 Hz, 3H); <sup>13</sup>C NMR (100 MHz, CDCl<sub>3</sub>) δ 172.4, 153.6, 145.0, 131.3, 129.1, 128.2, 127.9, 127.1, 124.9, 124.5, 114.1, 112.9, 112.5, 112.4, 65.0, 61.0, 58.8, 50.1, 31.0, 22.2, 20.2, 14.7, 14.0; **HRMS** (ESI+) calcd for C<sub>23</sub>H<sub>23</sub>N<sub>5</sub>NaO [M+Na]<sup>+</sup> 408.1789, found 408.1797; The ee was determined by **HPLC** analysis (Daicel Chiralcel AS-3 column, hexane-*i*-PrOH = 99: 1, flow rate = 1.0 mL/min) *t*<sub>R</sub> = 9.2 (minor enantiomer), 13.4 (major) min.

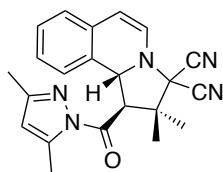

**(1R,10bR)-(+)-1-(3,5-Dimethyl-1H-pyrazole-1-carbonyl)-2,2-dimethyl-1,10b-**

**dihydropyrrolo[2,1-*a*]isoquinoline-3,3(2H)-dicarbonitrile (3al)** (Table 2): 97% yield; Yellow form; [α]<sup>25</sup><sub>D</sub> +283.2 (>99% ee, *c* 0.87, CHCl<sub>3</sub>); <sup>1</sup>H NMR (400 MHz, CDCl<sub>3</sub>) δ 7.21–7.14 (m, 1H), 7.13–7.00 (m, 2H), 6.63 (d, *J* = 7.6 Hz, 1H), 6.42 (d, *J* = 7.6 Hz, 1H), 6.10 (s, 1H), 6.01 (d, *J* = 7.2

Hz, 1H), 5.40 (d,  $J = 9.2$  Hz, 1H), 5.01 (d,  $J = 9.2$  Hz, 1H), 2.61 (s, 3H), 2.27 (s, 3H); 1.57 (s, 3H), 1.36 (s, 3H);  $^{13}\text{C}$  NMR (100 MHz,  $\text{CDCl}_3$ )  $\delta$  169.7, 153.3, 144.7, 131.1, 130.0, 128.2, 127.9, 127.8, 125.0, 123.6, 112.6, 111.9, 111.0, 66.5, 60.9, 54.8, 50.9, 25.8, 21.5, 14.6, 14.0; HRMS (ESI+) calcd for  $\text{C}_{22}\text{H}_{21}\text{N}_5\text{NaO}$   $[\text{M}+\text{Na}]^+$  394.1638, found 394.1641; The ee was determined by HPLC analysis (Daicel Chiralcel AD-3 column, hexane-*i*-PrOH = 98.4: 1.6, flow rate = 1.0 mL/min)  $t_{\text{R}} = 8.6$  (major enantiomer), 11.2 (minor) min.

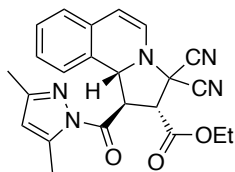

**Ethyl (1R,2R,10bR)-(+)-3,3-dicyano-1-(3,5-dimethyl-1H-pyrazole-1-**

**carbonyl)-1,2,3,10b-tetrahydropyrrolo[2,1-*a*]isoquinoline-2-carboxylate (3am) (Table 2):** 97% yield; Yellow solid;  $[\alpha]_{\text{D}}^{30} +338.2$  (>99% ee,  $c$  0.85,  $\text{CHCl}_3$ );  $^1\text{H}$  NMR (400 MHz,  $\text{CDCl}_3$ )  $\delta$  7.26–7.19 (m, 1H), 7.19–7.02 (m, 3H), 6.41 (d,  $J = 7.2$  Hz, 1H), 6.13–6.08 (m, 2H), 5.36 (dd,  $J = 8.4, 9.6$  Hz, 1H), 5.26 (d,  $J = 8.4$  Hz, 1H), 4.32 (d,  $J = 10.4$  Hz, 1H), 4.30–4.22 (m, 2H), 2.61 (s, 3H), 2.26 (s, 3H); 1.21 (d,  $J = 7.2$  Hz, 3H);  $^{13}\text{C}$  NMR (100 MHz,  $\text{CDCl}_3$ )  $\delta$  170.1, 166.2, 153.5, 144.9, 130.8, 128.7, 128.5, 128.0, 126.6, 125.1, 124.6, 112.7, 112.7, 112.4, 111.8, 63.1, 62.9, 57.4, 56.2, 48.5, 14.5, 13.9, 13.7; HRMS (FAB+) calcd for  $\text{C}_{23}\text{H}_{21}\text{N}_5\text{NaO}_3$   $[\text{M}+\text{Na}]^+$  438.1537, found 438.1557; The ee was determined by HPLC analysis (Daicel Chiralcel OD-3 column, hexane-*i*-PrOH = 98: 2, flow rate = 1.0 mL/min)  $t_{\text{R}} = 14.5$  (major enantiomer), 29.0 (minor) min.

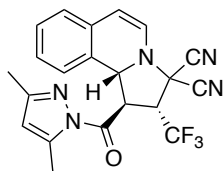

**(1R,2R,10bR)-(+)-1-(3,5-Dimethyl-1H-pyrazole-1-carbonyl)-2-**

**(trifluoromethyl)-1,10b-dihydropyrrolo[2,1-*a*]isoquinoline-3,3(2H)-dicyanitrile (3an) (Table 2):** 99% yield; Yellow foam;  $[\alpha]_{\text{D}}^{26} +339.7$  (>99% ee,  $c$  0.93,  $\text{CHCl}_3$ );  $^1\text{H}$  NMR (400 MHz,  $\text{CDCl}_3$ )  $\delta$  7.28–7.21 (m, 1H), 7.21–7.11 (m, 2H), 7.11–7.07 (m, 1H), 6.42 (d,  $J = 7.2$  Hz, 1H), 6.19 (d,  $J = 7.2$  Hz, 1H), 6.11 (s, 1H), 5.37 (dd,  $J = 7.4, 8.8$  Hz, 1H), 5.21 (d,  $J = 7.6$  Hz, 1H), 4.40–4.29 (m, 1H), 2.59 (s, 3H), 2.26 (s, 3H);  $^{13}\text{C}$  NMR (100 MHz,  $\text{CDCl}_3$ )  $\delta$  169.1, 154.3, 145.0, 130.6, 128.8, 128.4, 128.1, 126.1, 125.4, 124.4, 114.3, 113.2, 112.0, 110.1, 64.1(2C), 56.3 (q,  $J_{\text{CF}} = 29.6$  Hz), 54.4, 46.7, 14.4, 13.9;  $^{19}\text{F}$  NMR (376 MHz,  $\text{CDCl}_3$ )  $\delta$  -66.3; HRMS (ESI+) calcd for  $\text{C}_{21}\text{H}_{16}\text{F}_3\text{N}_5\text{NaO}$   $[\text{M}+\text{Na}]^+$  434.1199, found 434.1198; The ee was determined by HPLC analysis (Daicel Chiralcel AD-3 column, hexane-*i*-PrOH = 98.4: 1.6, flow rate = 1.0 mL/min)  $t_{\text{R}} = 16.6$  (major enantiomer), 19.7 (minor) min.

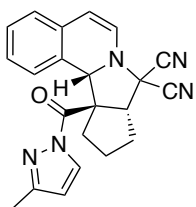

**(8aR,11aR,11bS)-(-)-11a-(3-Methyl-1H-pyrazole-1-carbonyl)-8a,9,10,11,11a,11b-**

**hexahydro-8H-cyclopenta[3,4]pyrrolo[2,1-a]isoquinoline-8,8-dicarbonitrile (3ap) (Table 3):**

97% yield; Yellow form;  $[\alpha]^{26}_D -127.2$  (99% ee,  $c$  0.88,  $\text{CHCl}_3$ );  $^1\text{H NMR}$  (400 MHz,  $\text{CDCl}_3$ )  $\delta$  8.21 (d,  $J = 2.8$  Hz, 1H), 7.16 (t,  $J = 7.6$  Hz, 1H), 7.12–7.05 (m, 1H), 6.99 (d,  $J = 7.2$  Hz, 1H), 6.94 (d,  $J = 7.2$  Hz, 1H), 6.48 (d,  $J = 7.6$  Hz, 1H), 6.26 (d,  $J = 3.2$  Hz, 1H), 6.00 (s, 1H), 5.79 (d,  $J = 7.6$  Hz, 1H), 4.38–4.30 (m, 1H), 2.99–2.88 (m, 1H), 2.37 (s, 3H), 2.33–2.20 (m, 1H), 2.20–2.10 (m, 2H), 1.92–1.72 (m, 2H);  $^{13}\text{C NMR}$  (100 MHz,  $\text{CDCl}_3$ )  $\delta$  170.6, 155.1, 132.3, 130.8, 129.6, 128.9, 128.2, 127.2, 125.1, 125.0, 114.5, 112.7, 110.9, 108.9, 67.3, 63.9, 58.8, 57.3, 33.0, 32.5, 25.9, 13.8; **HRMS** (ESI+) calcd for  $\text{C}_{22}\text{H}_{19}\text{N}_5\text{NaO}$   $[\text{M}+\text{Na}]^+$  392.1482, found 392.1490; The ee was determined by **HPLC** analysis (Daicel Chiralcel OD-3 column, hexane-*i*-PrOH = 98.0: 2.0, flow rate = 1 mL/min)  $t_R = 14.0$  (major enantiomer), 20.1 (minor) min.

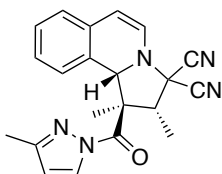

**(1R,2R,10bS)-(+)-1,2-Dimethyl-1-(3-methyl-1H-pyrazole-1-carbonyl)-1,10b-**

**dihydropyrrolo[2,1-a]isoquinoline-3,3(2H)-dicarbonitrile (3aq) (Table 3):** 93% yield; Yellow

form;  $[\alpha]^{26}_D +270.5$  (99% ee,  $c$  0.98,  $\text{CHCl}_3$ );  $^1\text{H NMR}$  (400 MHz,  $\text{CDCl}_3$ )  $\delta$  7.27 (d,  $J = 2.8$  Hz, 1H), 7.17–7.05 (m, 1H), 7.03–6.90 (m, 2H), 6.75 (s, 1H), 6.51 (d,  $J = 7.6$  Hz, 1H), 6.40 (d,  $J = 7.6$  Hz, 1H), 6.28 (d,  $J = 2.8$  Hz, 1H), 5.58 (d,  $J = 8.0$  Hz, 1H), 4.90–4.80 (m, 1H), 2.33 (s, 3H), 1.43 (s, 3H), 1.37 (d,  $J = 7.6$  Hz, 3H);  $^{13}\text{C NMR}$  (100 MHz,  $\text{CDCl}_3$ )  $\delta$  169.5, 154.9, 132.0, 131.5, 128.3, 128.1, 127.9, 126.9, 125.4, 124.4, 114.7, 112.4, 110.5, 105.0, 66.8, 58.4, 57.7, 49.5, 14.2, 13.6, 11.0; **HRMS**: the compound is too unstable to undergo the conditions of the mass spectrometer; The ee was determined by **HPLC** analysis (Daicel Chiralcel OD-3 column, hexane-*i*-PrOH = 98: 2, flow rate = 1 mL/min)  $t_R = 11.1$  (major enantiomer), 12.8 (minor) min.

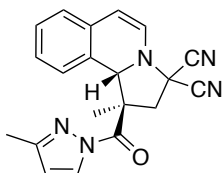

**(1R,10bS)-(-)-1-Methyl-1-(3-methyl-1H-pyrazole-1-carbonyl)-1,10b-**

**dihydropyrrolo[2,1-a]isoquinoline-3,3(2H)-dicarbonitrile (3ar) (Table 3):** 94% yield; Yellow

form;  $[\alpha]^{29}_D -126.0$  (89% ee,  $c$  0.93,  $\text{CHCl}_3$ );  $^1\text{H NMR}$  (400 MHz,  $\text{CDCl}_3$ )  $\delta$  8.22 (d,  $J = 2.8$  Hz, 1H), 7.18 (t,  $J = 7.4$  Hz, 1H), 7.09 (t,  $J = 7.6$  Hz, 1H), 7.06–6.98 (m, 2H), 6.45 (d,  $J = 7.6$  Hz, 1H), 6.29 (d,  $J = 2.8$  Hz, 1H), 5.83 (s, 1H), 5.74 (d,  $J = 7.6$  Hz, 1H), 3.59 (d,  $J = 14.0$  Hz, 1H), 3.26 (d,  $J = 14.0$  Hz,

1H), 2.35 (s, 3H), 1.77 (s, 3H);  $^{13}\text{C}$  NMR (100 MHz,  $\text{CDCl}_3$ )  $\delta$  170.7, 155.0, 132.4, 130.8, 128.3, 127.9, 126.9, 126.1, 125.3, 114.2, 114.1, 110.7, 107.5, 66.0, 52.9, 51.7, 48.9, 21.3, 14.1; HRMS (ESI+) calcd for  $\text{C}_{20}\text{H}_{17}\text{N}_5\text{NaO}$   $[\text{M}+\text{Na}]^+$  366.1325, found 366.1339; The ee was determined by HPLC analysis (Daicel Chiralcel OD-3 column, hexane-*i*-PrOH = 98.0: 2.0, flow rate = 1 mL/min)  $t_{\text{R}}$  = 24.5 (major enantiomer), 39.2 (minor) min.

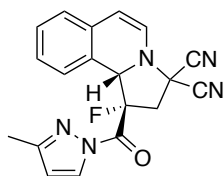

**(1S,10bS)-(+)-1-Fluoro-1-(3-methyl-1H-pyrazole-1-carbonyl)-1,10b-dihydropyrrolo[2,1-a]isoquinoline-3,3(2H)-dicarbonitrile (3as) (Table 3):** 97% yield; Yellow form;  $[\alpha]_{\text{D}}^{28} +31.9$  (>99% ee,  $c$  0.84,  $\text{CHCl}_3$ );  $^1\text{H}$  NMR (400 MHz,  $\text{CDCl}_3$ )  $\delta$  8.28 (d,  $J$  = 2.8 Hz, 1H), 7.22 (t,  $J$  = 7.2 Hz, 1H), 7.18–7.02 (m, 2H), 6.94 (d,  $J$  = 7.2 Hz, 1H), 6.52 (d,  $J$  = 7.6 Hz, 1H), 6.37 (d,  $J$  = 2.8 Hz, 1H), 5.95 (d,  $J$  = 21.2 Hz, 1H), 5.87 (d,  $J$  = 7.2 Hz, 1H), 4.23–4.08 (m, 1H), 3.31 (dd,  $J$  = 15.0, 24.6 Hz, 1H), 2.37 (s, 3H);  $^{13}\text{C}$  NMR (100 MHz,  $\text{CDCl}_3$ )  $\delta$  163.6 (d,  $J$  = 26.9 Hz, 1C), 156.6, 131.8, 131.0, 128.8, 127.4 (d,  $J$  = 14.3 Hz, 1C), 125.5, 124.7, 124.6, 113.6, 113.1, 112.1, 108.8, 67.7, 67.5, 52.2, 48.8, 48.5, 13.9;  $^{19}\text{F}$  NMR (376 MHz,  $\text{CDCl}_3$ )  $\delta$  -153.6; HRMS (ESI+) calcd for  $\text{C}_{19}\text{H}_{15}\text{FN}_5\text{O}$   $[\text{M}+\text{H}]^+$  348.1225, found 348.1251; The ee was determined by HPLC analysis (Daicel Chiralcel AD-3 column, hexane-*i*-PrOH = 95: 5, flow rate = 1 mL/min)  $t_{\text{R}}$  = 19.4 (major enantiomer), 22.7 (minor) min.

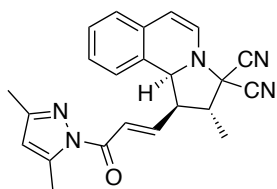

**(1R,2R,10bS)-(+)-1-((E)-3-(3,5-Dimethyl-1H-pyrazol-1-yl)-3-oxoprop-1-en-1-yl)-2-methyl-1,10b-dihydropyrrolo[2,1-a]isoquinoline-3,3(2H)-dicarbonitrile (endo-6aa) (Use of L5, Table 5):** 96% yield; Yellow form;  $[\alpha]_{\text{D}}^{30} +353.4$  (95% ee,  $c$  0.75,  $\text{CHCl}_3$ );  $^1\text{H}$  NMR (400 MHz,  $\text{CDCl}_3$ )  $\delta$  7.73 (d,  $J$  = 15.6 Hz, 1H), 7.23–7.09 (m, 3H), 7.08–6.99 (m, 2H), 6.34 (d,  $J$  = 7.6 Hz, 1H), 6.05 (s, 1H), 5.94 (d,  $J$  = 7.2 Hz, 1H), 5.02 (d,  $J$  = 8.8 Hz, 1H), 3.36–3.23 (m, 1H), 2.97–2.83 (m, 1H), 2.61 (s, 3H), 2.28 (s, 3H), 1.46 (d,  $J$  = 6.8 Hz, 3H);  $^{13}\text{C}$  NMR (100 MHz,  $\text{CDCl}_3$ )  $\delta$  163.9, 152.7, 145.2, 144.7, 131.0, 129.5, 128.4, 127.8, 126.7, 126.0, 125.1, 123.7, 113.4, 112.3, 112.1, 110.2, 62.9, 60.3, 54.2, 49.3, 14.7, 13.9, 13.0; HRMS (ESI+) calcd for  $\text{C}_{23}\text{H}_{21}\text{N}_5\text{NaO}$   $[\text{M}+\text{Na}]^+$  406.1638, found 406.1626; The ee was determined by HPLC analysis (Daicel Chiralcel AD-3, hexane-*i*-PrOH = 98.4: 1.6, flow rate = 1.0 mL/min)  $t_{\text{R}}$  = 22.9 (minor enantiomer), 23.9 (major) min.

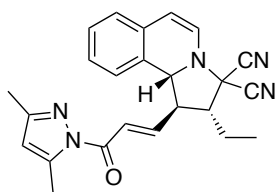

**(1R,2R,10bR)-(+)-1-((E)-3-(3,5-dimethyl-1H-pyrazol-1-yl)-3-oxoprop-1-en-1-yl)-2-ethyl-1,10b-dihydropyrrolo[2,1-a]isoquinoline-3,3(2H)-dicarbonitrile (*exo*-6ab)** (Use of **L5**, **Table 5**): 54% yield; Yellowish form;  $[\alpha]^{25}_D +380.7$  (>99% ee, *c* 0.50, CHCl<sub>3</sub>); <sup>1</sup>H NMR (400 MHz, CDCl<sub>3</sub>) δ 7.73 (d, *J* = 15.6 Hz, 1H), 7.24–6.98 (m, 5H), 6.37 (d, *J* = 7.6 Hz, 1H), 6.05 (s, 1H), 5.93 (d, *J* = 7.6 Hz, 1H), 4.99 (d, *J* = 8.8 Hz, 1H), 3.39–3.26 (m, 1H), 2.86–2.72 (m, 1H), 2.62 (s, 3H), 2.28 (s, 3H), 2.06–1.91 (m, 1H), 1.90–1.76 (m, 1H), 1.22 (t, *J* = 7.6 Hz, 3H); <sup>13</sup>C NMR (100 MHz, CDCl<sub>3</sub>) δ 163.9, 152.7, 145.8, 144.7, 131.2, 129.6, 128.4, 127.7, 126.7, 126.0, 125.0, 123.7, 114.0, 112.2, 112.1, 109.9, 62.8, 58.5, 55.9, 53.4, 22.9, 14.7, 13.9; 12.3; **HRMS** (FAB+) calcd for C<sub>24</sub>H<sub>23</sub>N<sub>5</sub>NaO [M+Na]<sup>+</sup> 420.1800, found 420.1811; The ee was determined by **HPLC** analysis (Daicel Chiralcel IA-3, hexane-*i*-PrOH = 99: 1, flow rate = 1.0 mL/min) *t*<sub>R</sub> = 21.9 (minor enantiomer), 26.5 (major) min.

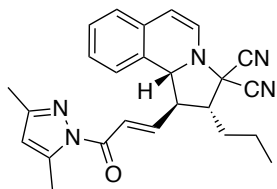

**(1R,2R,10bR)-(+)-1-((E)-3-(3,5-Dimethyl-1H-pyrazol-1-yl)-3-oxoprop-1-en-1-yl)-2-propyl-1,10b-dihydropyrrolo[2,1-a]isoquinoline-3,3(2H)-dicarbonitrile** (Use of **L5**, *exo*-6ac) (**Table 5**): 78% yield; Brown form;  $[\alpha]^{26}_D +330.0$  (81% ee, *c* 0.98, CHCl<sub>3</sub>); <sup>1</sup>H NMR (400 MHz, CDCl<sub>3</sub>) δ 7.72 (d, *J* = 16.0 Hz, 1H), 7.22–7.09 (m, 3H), 7.09–6.99 (m, 2H), 6.37 (d, *J* = 7.2 Hz, 1H), 6.05 (s, 1H), 5.92 (d, *J* = 7.6 Hz, 1H), 4.98 (d, *J* = 8.8 Hz, 1H), 3.40–3.25 (m, 1H), 2.92–2.80 (m, 1H), 2.62 (s, 3H), 2.29 (s, 3H), 1.91–1.49 (m, 4H), 1.02 (t, *J* = 7.0 Hz, 3H); <sup>13</sup>C NMR (100 MHz, CDCl<sub>3</sub>) δ 163.9, 152.7, 145.8, 144.7, 131.2, 129.6, 128.3, 127.7, 126.7, 126.0, 125.0, 123.7, 113.9, 112.2, 112.1, 109.9, 62.7, 58.7, 54.1, 53.4, 31.7, 21.0, 14.7, 14.1, 13.9; **HRMS** (ESI+) calcd for C<sub>25</sub>H<sub>25</sub>N<sub>5</sub>NaO [M+Na]<sup>+</sup> 434.1951, found 434.1965; The ee was determined by **HPLC** analysis (Daicel Chiralcel IA-3, hexane-*i*-PrOH = 99: 1, flow rate = 1.0 mL/min) *t*<sub>R</sub> = 21.7 (minor enantiomer), 23.2 (major) min.

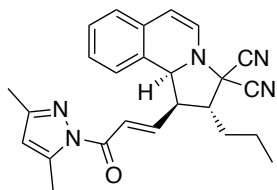

**(1R,2R,10bS)-(+)-1-((E)-3-(3,5-dimethyl-1H-pyrazol-1-yl)-3-oxoprop-1-en-1-yl)-2-propyl-1,10b-dihydropyrrolo[2,1-a]isoquinoline-3,3(2H)-dicarbonitrile (*endo*-6ac)** (Use of **L7**, **Table 5**): 82% yield; 38% ee; <sup>1</sup>H NMR (400 MHz, CDCl<sub>3</sub>) δ 7.46 (d, *J* = 15.6 Hz, 1H), 7.27–7.10 (m, 2H), 7.09–6.97 (m, 2H), 6.88 (d, *J* = 7.2 Hz, 1H), 6.44 (d, *J* = 7.6 Hz, 1H), 6.00 (s, 1H), 5.84

(d,  $J = 7.6$  Hz, 1H), 4.92 (d,  $J = 6.0$  Hz, 1H), 3.32–3.20 (m, 1H), 2.72–2.62 (m, 1H), 2.53 (s, 3H), 2.29 (s, 3H), 1.99–1.81 (m, 2H), 1.68–1.51 (m, 2H), 1.05 (t,  $J = 6.8$  Hz, 3H);  $^{13}\text{C}$  NMR (100 MHz,  $\text{CDCl}_3$ )  $\delta$  163.9, 152.3, 148.1, 144.7, 131.9, 128.4, 128.0, 127.9, 127.3, 126.1, 125.4, 122.8, 113.4, 111.8, 111.3, 109.6, 61.7, 58.1, 56.0, 48.9, 33.9, 21.2, 14.7, 14.0; HRMS (ESI+) calcd for  $\text{C}_{25}\text{H}_{25}\text{N}_5\text{NaO}$   $[\text{M}+\text{Na}]^+$  434.1951, found 434.1972; The ee was determined by HPLC analysis (Daicel Chiralcel IA-3, hexane-*i*-PrOH = 98.4: 1.6, flow rate = 1.0 mL/min)  $t_{\text{R}}$  = 18.2 (major enantiomer), 24.5 (minor) min.

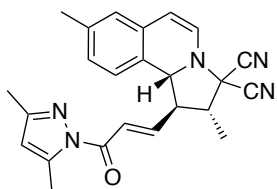

**(1R,2R,10bR)-(+)-1-((E)-3-(3,5-Dimethyl-1H-pyrazol-1-yl)-3-oxoprop-1-en-1-yl)-2,8-dimethyl-1,10b-dihydropyrrolo[2,1-a]isoquinoline-3,3(2H)-dicyanitrile (*exo*-6ea)**

(Use of L5, Table 5): 88% yield; Yellow form;  $[\alpha]_{\text{D}}^{24} +353.0$  (89% ee,  $c$  0.75,  $\text{CHCl}_3$ );  $^1\text{H}$  NMR (400 MHz,  $\text{CDCl}_3$ )  $\delta$  7.71 (d,  $J = 15.6$  Hz, 1H), 7.17 (dd,  $J = 9.2, 16.0$  Hz, 1H), 6.92 (s, 2H), 6.83 (s, 1H), 6.32 (d,  $J = 7.6$  Hz, 1H), 6.05 (s, 1H), 5.90 (d,  $J = 7.2$  Hz, 1H), 4.98 (d,  $J = 8.8$  Hz, 1H), 3.31–3.21 (m, 1H), 2.94–2.81 (m, 1H), 2.61 (s, 3H), 2.28 (s, 3H), 2.27 (s, 3H), 1.45 (d,  $J = 6.8$  Hz, 3H);  $^{13}\text{C}$  NMR (100 MHz,  $\text{CDCl}_3$ )  $\delta$  163.9, 152.7, 145.3, 144.7, 138.0, 130.8, 128.4, 126.8, 126.7, 125.9, 125.8, 123.6, 113.4, 112.3, 112.1, 110.3, 62.8, 60.3, 54.4, 49.3, 21.1, 14.7, 13.9, 13.0; HRMS (FAB+) calcd for  $\text{C}_{24}\text{H}_{23}\text{N}_5\text{NaO}$   $[\text{M}+\text{Na}]^+$  420.1800, found 420.1790; The ee was determined by HPLC analysis (Daicel Chiralcel AD-3 column, hexane-*i*-PrOH = 98.4: 1.6, flow rate = 1 mL/min)  $t_{\text{R}}$  = 15.6 (minor enantiomer), 17.5 (major) min.

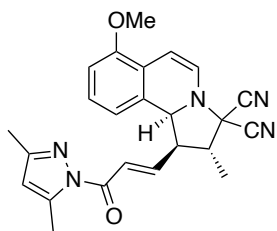

**(1R,2R,10bS)-1-((E)-3-(3,5-Dimethyl-1H-pyrazol-1-yl)-3-oxoprop-1-en-1-yl)-7-methoxy-2-methyl-1,10b-dihydropyrrolo[2,1-a]isoquinoline-3,3(2H)-dicyanitrile (*endo*-6fa)**

(Use of L5, Table 5): 73% yield; Yellow form;  $[\alpha]_{\text{D}}^{27} +71.4$  (84% ee,  $c$  0.98,  $\text{CHCl}_3$ );  $^1\text{H}$  NMR (400 MHz,  $\text{CDCl}_3$ )  $\delta$  7.47 (d,  $J = 15.6$  Hz, 1H), 7.22 (dd,  $J = 10.0, 15.6$  Hz, 1H), 7.08–6.99 (m, 1H), 6.71 (d,  $J = 8.4$  Hz, 1H), 6.47 (d,  $J = 7.2$  Hz, 1H), 6.41 (d,  $J = 7.6$  Hz, 1H), 6.21 (d,  $J = 7.6$  Hz, 1H), 6.00 (s, 1H), 4.99 (d,  $J = 6.4$  Hz, 1H), 3.82 (s, 3H), 3.28–3.18 (m, 1H), 2.85–2.73 (m, 1H), 2.53 (s, 3H), 2.28 (s, 3H), 1.55 (d,  $J = 6.8$  Hz, 3H);  $^{13}\text{C}$  NMR (100 MHz,  $\text{CDCl}_3$ )  $\delta$  163.8, 154.2, 152.3, 147.5, 144.7, 129.0, 128.2, 126.9, 123.0, 121.1, 118.3, 113.3, 111.7, 111.4, 110.3, 103.4, 61.5, 59.0, 55.7, 51.1, 50.5, 16.1, 14.7, 13.9; HRMS (ESI+) calcd for  $\text{C}_{24}\text{H}_{23}\text{N}_5\text{NaO}_2$   $[\text{M}+\text{Na}]^+$  436.1744, found 436.1730; The ee was determined by HPLC analysis (Daicel Chiralcel OD-3 column, hexane-*i*-PrOH

= 98: 2, flow rate = 1 mL/min)  $t_R$  = 30.6 (major enantiomer), 33.0 (minor) min.

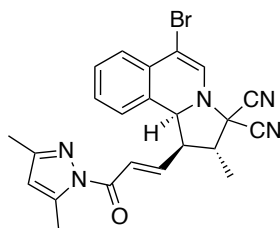

**(1R,2R,10bS)-(-)-6-Bromo-1-((E)-3-(3,5-dimethyl-1H-pyrazol-1-yl)-3-oxoprop-1-en-1-yl)-2-methyl-1,10b-dihydropyrrolo[2,1-a]isoquinoline-3,3(2H)-dicyanitrile (endo-6ba) (Use of L5, Table 5):** 54% yield; Brown form;  $[\alpha]^{24}_D$  -8.0 (97% ee,  $c$  0.70,  $\text{CHCl}_3$ );  $^1\text{H NMR}$  (400 MHz,  $\text{CDCl}_3$ )  $\delta$  7.51 (d,  $J$  = 15.6 Hz, 1H), 7.48–7.43 (m, 1H), 7.30–7.23 (m, 1H), 7.21–7.11 (m, 2H), 6.86 (d,  $J$  = 7.2 Hz, 1H), 6.80 (s, 1H), 6.01 (d,  $J$  = 1.2 Hz, 1H), 5.08 (d,  $J$  = 6.4 Hz, 1H), 3.33–3.24 (m, 1H), 2.88–2.78 (m, 1H), 2.53 (s, 3H), 2.28 (s, 3H). 1.56 (t,  $J$  = 7.2 Hz, 3H);  $^{13}\text{C NMR}$  (100 MHz,  $\text{CDCl}_3$ )  $\delta$  163.6, 152.5, 146.4, 144.8, 130.8, 128.7, 128.6, 127.7, 125.9, 125.8, 123.6, 112.9, 111.9, 111.1, 103.1, 61.5, 58.7, 51.2, 50.3, 16.1, 14.6, 13.9; **HRMS** (ESI+) calcd for  $\text{C}_{23}\text{H}_{20}\text{BrN}_5\text{NaO}$   $[\text{M}+\text{Na}]^+$  484.0743, found 484.0759; The ee was determined by **HPLC** analysis (Daicel Chiralcel AD-3 column, hexane-*i*-PrOH = 98.4: 1.6, flow rate = 1 mL/min)  $t_R$  = 22.8 (major enantiomer), 28.0 (minor) min.

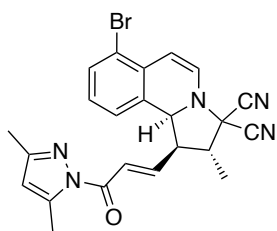

**(1R,2R,10bS)-(+)-7-Bromo-1-((E)-3-(3,5-dimethyl-1H-pyrazol-1-yl)-3-oxoprop-1-en-1-yl)-2-methyl-1,10b-dihydropyrrolo[2,1-a]isoquinoline-3,3(2H)-dicyanitrile (endo-6ga) (Use of L5, Table 5):** 43% yield; Yellow form;  $[\alpha]^{26}_D$  +104.2 (94% ee,  $c$  0.61,  $\text{CHCl}_3$ );  $^1\text{H NMR}$  (400 MHz,  $\text{CDCl}_3$ )  $\delta$  7.49 (d,  $J$  = 16.0 Hz, 1H), 7.39 (d,  $J$  = 8.4 Hz, 1H), 7.18 (dd,  $J$  = 10.0, 15.6 Hz, 1H), 6.90 (t,  $J$  = 7.6 Hz, 1H), 6.80 (d,  $J$  = 7.6 Hz, 1H), 6.52 (d,  $J$  = 8.0 Hz, 1H), 6.20 (d,  $J$  = 7.6 Hz, 1H), 6.01 (s, 1H), 5.06 (d,  $J$  = 6.0 Hz, 1H), 3.31–3.21 (m, 1H), 2.88–2.78 (m, 1H), 2.54 (s, 3H), 2.28 (s, 3H). 1.56 (t,  $J$  = 7.2 Hz, 3H);  $^{13}\text{C NMR}$  (100 MHz,  $\text{CDCl}_3$ )  $\delta$  163.6, 152.5, 146.5, 144.8, 132.6, 131.6, 129.5, 128.1, 125.3, 123.6, 121.1, 113.0, 111.9, 111.2, 107.5, 61.5, 58.7, 51.2, 50.4, 16.2, 14.7, 13.9; **HRMS** (ESI+) calcd for  $\text{C}_{23}\text{H}_{20}\text{BrN}_5\text{NaO}$   $[\text{M}+\text{Na}]^+$  484.0743, found 484.0771; The ee was determined by **HPLC** analysis (Daicel Chiralcel AD-3 column, hexane-*i*-PrOH = 98.4: 1.6, flow rate = 1 mL/min)  $t_R$  = 29.2 (major enantiomer), 40.5 (minor) min.

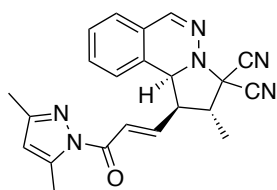

**(1R,2R,10bS)-(-)-1-((E)-3-(3,5-Dimethyl-1H-pyrazol-1-yl)-3-oxoprop-1-**

**en-1-yl)-2-methyl-1,10b-dihydropyrrolo[2,1-*a*]phthalazine-3,3(2*H*)-dicarbonitrile** (*endo*-6da)  
**(Use of L5, Table 5):** 42% yield; Brown form;  $[\alpha]_D^{26} -46.7$  (98% ee, *c* 1.5, CHCl<sub>3</sub>); <sup>1</sup>H NMR (400 MHz, CDCl<sub>3</sub>) δ 7.71 (s, 1H), 7.51 (d, *J* = 15.6 Hz, 1H), 7.40–7.28 (m, 3H), 7.11 (dd, *J* = 10.8, 15.6 Hz, 1H), 7.08–7.02 (m, 1H), 6.02 (s, 1H), 4.70 (d, *J* = 7.6 Hz, 1H), 3.23–3.13 (m, 1H), 2.82–2.71 (m, 1H), 2.55 (s, 3H), 2.29 (s, 3H). 1.57 (t, *J* = 7.2 Hz, 3H); <sup>13</sup>C NMR (100 MHz, CDCl<sub>3</sub>) δ 169.9, 165.9, 153.7, 145.0, 129.6, 129.3, 128.7, 124.8, 124.2, 123.1, 120.4, 112.7, 111.9, 111.6, 63.2, 63.0, 57.1, 56.1, 48.2, 14.5, 13.9, 13.7; **HRMS** (ESI+) calcd for C<sub>22</sub>H<sub>20</sub>N<sub>6</sub>NaO [M+Na]<sup>+</sup> 407.1591, found 407.1617; The ee was determined by **HPLC** analysis (Daicel Chiralcel AD-3 column, hexane-*i*-PrOH = 90: 10, flow rate = 1 mL/min) *t*<sub>R</sub> = 14.3 (minor enantiomer), 15.3 (major) min.

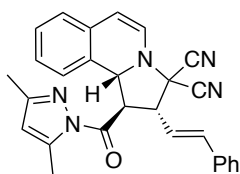

**(1*R*,2*R*,10*bR*)-(+)-1-(3,5-Dimethyl-1*H*-pyrazole-1-carbonyl)-2-((*E*)-styryl)-**

**1,10b-dihydropyrrolo[2,1-*a*]isoquinoline-3,3(2*H*)-dicarbonitrile** (*exo*-5ad) **(Use of L5, Table 5):** 63% yield; Yellow form;  $[\alpha]_D^{30} +621.9$  (>99% ee, *c* 0.56, CHCl<sub>3</sub>); <sup>1</sup>H NMR (400 MHz, CDCl<sub>3</sub>) δ 7.40–7.27 (m, 5H), 7.19 (t, *J* = 7.2 Hz, 1H), 7.09 (t, *J* = 7.2 Hz, 1H), 7.03 (d, *J* = 6.8 Hz, 1H), 6.80–6.71 (m, 2H), 6.40–6.29 (m, 2H), 6.02 (s, 1H), 5.99 (d, *J* = 7.6 Hz, 1H), 5.49 (d, *J* = 8.8 Hz, 1H), 5.37 (dd, *J* = 8.8, 10.8 Hz, 1H), 4.03–3.92 (m, 1H), 2.56 (s, 3H), 2.24 (s, 3H); <sup>13</sup>C NMR (100 MHz, CDCl<sub>3</sub>) δ 170.3, 153.6, 144.7, 138.1, 135.4, 140.0, 128.9, 128.7, 128.3, 127.9, 127.0, 126.7, 125.1, 124.0, 119.9, 113.0, 112.2, 110.8, 62.7, 60.7, 58.1, 52.1, 14.6, 13.9; **HRMS** (ESI+) calcd for C<sub>22</sub>H<sub>20</sub>N<sub>6</sub>NaO [M+H]<sup>+</sup> 446.1975, found 446.1977; The ee was determined by **HPLC** analysis (Daicel Chiralcel AD-3 column, hexane-*i*-PrOH = 98.4: 1.6, flow rate = 1 mL/min) *t*<sub>R</sub> = 33.9 (major enantiomer), 37.0 (minor) min.

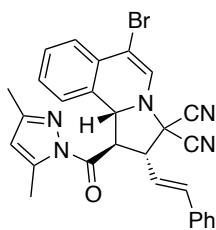

**(1*R*,2*R*,10*bR*)-(+)-6-bromo-1-(3,5-dimethyl-1*H*-pyrazole-1-carbonyl)-2-((*E*)-**

**styryl)-1,10b-dihydropyrrolo[2,1-*a*]isoquinoline-3,3(2*H*)-dicarbonitrile** (*exo*-5bd) **(Use of L5, Table 5):** 78% yield; Yellowish form;  $[\alpha]_D^{25} +607.3$  (>99% ee, *c* 0.92, CHCl<sub>3</sub>); <sup>1</sup>H NMR (400 MHz, CDCl<sub>3</sub>) δ 7.50 (d, *J* = 7.6 Hz, 1H), 7.42–7.27 (m, 6H), 7.21 (t, *J* = 7.6 Hz, 1H), 6.87–6.70 (m, 3H), 6.31 (dd, *J* = 9.2, 15.6 Hz, 1H), 6.03 (s, 1H), 5.52 (d, *J* = 8.4 Hz, 1H), 5.40 (dd, *J* = 8.4, 10.8 Hz, 1H), 4.04–3.93 (m, 1H), 2.56 (s, 3H), 2.26 (s, 3H); <sup>13</sup>C NMR (100 MHz, CDCl<sub>3</sub>) δ 170.0, 153.8, 144.8, 138.5, 135.2, 129.5, 128.7, 128.6, 127.2, 127.0, 123.9, 119.3, 113.1, 112.3, 111.9, 106.6, 62.5, 60.3, 58.2, 51.9, 14.5, 14.0; **HRMS** (ESI+) calcd for C<sub>28</sub>H<sub>22</sub>BrN<sub>5</sub>NaO [M+Na]<sup>+</sup> 546.0900, found 546.0892;



The ee was determined by **HPLC** analysis (Daicel Chiralcel IA-3 column, hexane-*i*-PrOH = 98.4: 1.6, flow rate = 1 mL/min)  $t_R$  = 12.9 (major enantiomer), 16.0 (minor) min.

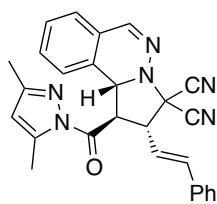

**(1R,2R,10bR)-(+)-1-(3,5-dimethyl-1H-pyrazole-1-carbonyl)-2-((E)-styryl)-**

**1,10b-dihydropyrrolo[2,1-a]phthalazine-3,3(2H)-dicyanitrile (*exo*-5dd) (Use of L5, Table 5):**

91% yield; White form;  $[\alpha]_D^{25} +353.6$  (>99% ee,  $c$  0.88, CHCl<sub>3</sub>); <sup>1</sup>H NMR (400 MHz, CDCl<sub>3</sub>)  $\delta$  7.76 (s, 1H), 7.44–7.25 (m, 8H), 6.98–6.89 (m, 1H), 6.67 (d,  $J$  = 15.6 Hz, 1H), 6.33 (dd,  $J$  = 10.0, 15.6 Hz, 1H), 6.04 (s, 1H), 5.10–4.93 (m, 2H), 3.98 (dd,  $J$  = 7.6, 9.6 Hz, 1H), 2.59 (s, 3H), 2.17 (s, 3H); <sup>13</sup>C NMR (100 MHz, CDCl<sub>3</sub>)  $\delta$  170.1, 153.6, 145.3, 144.7, 137.2, 135.5, 132.2, 128.9, 128.7, 127.0, 126.3, 125.0, 123.9, 122.7, 113.4, 112.9, 111.8, 61.2, 60.0, 56.3, 49.8, 14.5, 13.8; **HRMS** (ESI+) calcd for C<sub>27</sub>H<sub>23</sub>N<sub>6</sub>O [M+H]<sup>+</sup> 447.1928, found 447.1917; The ee was determined by **HPLC** analysis (Daicel Chiralcel AD-3 column, hexane-*i*-PrOH = 98: 2, flow rate = 1 mL/min)  $t_R$  = 35.0 (minor enantiomer), 45.5 (major) min.

## 7. Synthetic Transformation of 3am (Scheme 3)

### Chlorination:

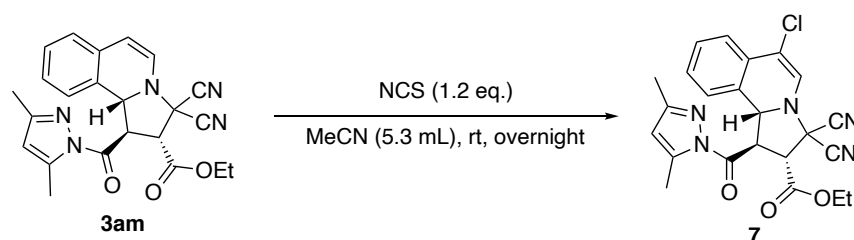

A mixture of **3am** (0.2 mmol) and *N*-Chlorosuccinimide (NCS, 1.2 equiv) were dissolved in anhydrous acetonitrile (5.3 mL). After stirring overnight at ambient temperature, the reaction was quenched by the addition of saturated *aq.* Na<sub>2</sub>S<sub>2</sub>O<sub>3</sub> (5 mL). The resultant mixture was extracted with ethyl acetate (3 x 10 mL). The combined organic layer was dried over Na<sub>2</sub>SO<sub>4</sub>, filtered and concentrated. The crude product was purified by column chromatography on silica gel using (hexane-EtOAc = 10:1 → 5:1) to give **7**.

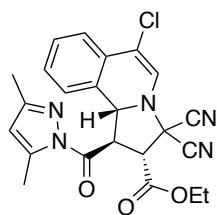

**Ethyl (1R,2R,10bR)-(+)-6-Chloro-3,3-dicyano-1-(3,5-dimethyl-1H-pyrazole-1-**

**carbonyl)-1,2,3,10b-tetrahydropyrrolo[2,1-a]isoquinoline-2-carboxylate (7):** 75% yield; Yellow foam;  $[\alpha]_D^{25} +424.1$  (>99% ee,  $c$  0.66, CHCl<sub>3</sub>); <sup>1</sup>H NMR (400 MHz, CDCl<sub>3</sub>)  $\delta$  7.54 (d,  $J$  = 8.0 Hz,

1H), 7.39–7.27 (m, 3H), 6.62 (s, 1H), 6.10 (s, 1H), 5.40 (dd,  $J = 7.2, 9.6$  Hz, 1H), 5.24 (d,  $J = 7.2$  Hz, 1H), 4.40 (d,  $J = 9.6$  Hz, 1H), 4.30–4.20 (m, 2H), 2.60 (s, 3H), 2.26 (s, 3H), 1.20 (t,  $J = 7.2$  Hz, 3H);  $^{13}\text{C}$  NMR (100 MHz,  $\text{CDCl}_3$ )  $\delta$  169.9, 165.9, 153.7, 145.0, 129.7, 129.3, 128.7, 124.8, 124.2, 123.1, 120.4, 112.7, 111.9, 111.6, 63.2, 63.0, 57.1, 56.1, 48.2, 14.5, 13.9, 13.7; HRMS (FAB+) calcd for  $\text{C}_{23}\text{H}_{20}\text{ClN}_5\text{NaO}_3$   $[\text{M}+\text{Na}]^+$  472.1147; found 472.1167; The ee was determined by HPLC analysis (Daicel Chiralcel IA-3 column, hexane-*i*-PrOH = 95: 5, flow rate = 1.0 mL/min)  $t_{\text{R}} = 8.4$  (minor enantiomer), 10.0 (major) min

### Elimination:

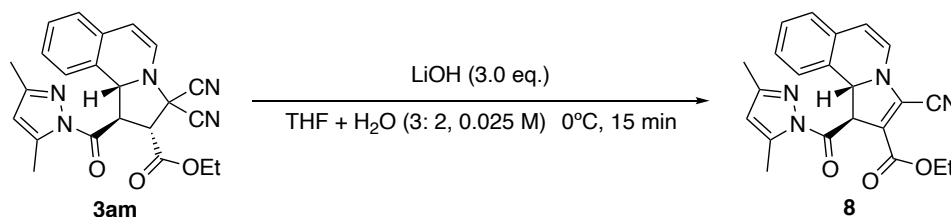

To a solution of **3am** (0.2 mmol) in THF/ $\text{H}_2\text{O}$  (3:2, 8 mL) was added LiOH (3.0 equiv) at ambient temperature. After stirring 15 minutes at ambient temperature, the reaction was quenched by the addition of 1 M HCl. The resultant mixture was extracted with ethyl acetate. The combined organic layer was dried over  $\text{Na}_2\text{SO}_4$ , filtered and concentrated. The crude product was purified by column chromatography on silica gel using (hexane-EtOAc = 10:1  $\rightarrow$  5:1) to give **8**.

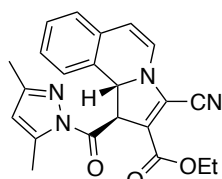

**Ethyl (1R,10bR)-(+)-3-cyano-1-(3,5-dimethyl-1H-pyrazole-1-carbonyl)-1,10b-dihydropyrrolo[2,1-a]isoquinoline-2-carboxylate (8):** 91% yield; Yellow foam;  $[\alpha]_{\text{D}}^{26} +327.0$  (>99% ee,  $c$  0.74,  $\text{CHCl}_3$ );  $^1\text{H}$  NMR (400 MHz,  $\text{CDCl}_3$ )  $\delta$  7.38 (d,  $J = 7.2$  Hz, 1H), 7.28–7.21 (m, 1H), 7.20–7.14 (m, 1H), 7.09 (dd,  $J = 1.2, 7.2$  Hz, 1H), 6.82 (d,  $J = 7.6$  Hz, 1H), 6.19 (d,  $J = 10.6$  Hz, 1H), 6.11 (d,  $J = 1.2$  Hz, 1H), 6.00 (d,  $J = 8.0$  Hz, 1H), 5.49 (d,  $J = 13.6$  Hz, 1H), 4.14 (dd,  $J = 7.2, 9.2$  Hz, 1H), 2.58 (s, 3H), 2.32 (s, 3H), 1.12 (t,  $J = 7.2$  Hz, 3H);  $^{13}\text{C}$  NMR (100 MHz,  $\text{CDCl}_3$ )  $\delta$  173.1, 162.3, 152.9, 144.6, 131.5, 129.6, 128.5, 127.5, 125.0, 124.7, 124.4, 124.0, 116.0, 112.5, 110.1, 109.1, 66.2, 61.0, 51.3, 14.6, 14.1, 13.8; HRMS (ESI+) calcd for  $\text{C}_{22}\text{H}_{20}\text{N}_4\text{NaO}_3$   $[\text{M}+\text{Na}]^+$  411.1428; found 411.1448; The ee was determined by HPLC analysis (Daicel Chiralcel OD-3 column, hexane-*i*-PrOH = 98: 2, flow rate = 1.0 mL/min)  $t_{\text{R}} = 19.0$  (major enantiomer), 25.8 (minor) min.

### **8. General Procedure for the Remote Asymmetric Dearomative [3+2] Cycloaddition Reactions of 1a with 9a.**

A mixture of mono-peptide ligand **L5** (11 mol%), copper(II) triflate (10 mol%) and activated molecular sieves 4A (150–200 mg) were dissolved in anhydrous acetonitrile (1.0 mL). After stirring

for 15 min at ambient temperature, the solution was concentrated under reduced pressure. The resultant residue was diluted with CH<sub>2</sub>Cl<sub>2</sub> (2.0 mL) and cooled to -10°C. Isoquinolinium ylides **1a** (0.2 mmol, 1.0 equiv) and **9a** (0.2 mmol) were then added and the reaction mixture was stirred at the same temperature for 48 h. The reaction was quenched with a few drops of triethylamine and then passed through a short pad silica gel to remove ligand and copper. After evaporation of the filtrate under reduced pressure, the crude product was then purified by column chromatography on silica gel (hexane–EtOAc = 10:1 to 5:1) to give products **10aa**, **11aa**, and **12aa**.

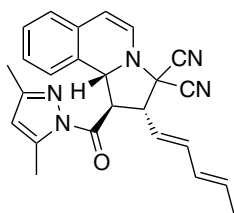

**(1R,2R,10bR)-(+)-1-(3,5-Dimethyl-1H-pyrazole-1-carbonyl)-2-((1E,3E)-**

**penta-1,3-dien-1-yl)-1,10b-dihydropyrrolo[2,1-a]isoquinoline-3,3(2H)-dicarbonitrile (10aa):**

7% yield; Yellowish form;  $[\alpha]^{24}_D +483.7$  (>99% ee, *c* 0.53, CHCl<sub>3</sub>); <sup>1</sup>H NMR (400 MHz, CDCl<sub>3</sub>) δ 7.22–7.12 (m, 1H), 7.11–6.98 (m, 2H), 6.73 (d, *J* = 7.6 Hz, 1H), 6.38 (dd, *J* = 10.4, 15.2 Hz, 1H), 6.34 (d, *J* = 7.2 Hz, 1H), 6.08 (d, *J* = 0.8 Hz, 1H), 6.07–5.92 (m, 3H), 5.83–5.70 (m, 1H), 5.64 (dd, *J* = 9.6, 15.2 Hz, 1H), 5.40 (d, *J* = 8.8 Hz, 1H), 5.27 (dd, *J* = 8.8, 11.6 Hz, 1H), 3.86 (dd, *J* = 9.6, 10.8 Hz, 1H), 2.57 (s, 3H), 2.27 (s, 3H), 1.76 (dd, *J* = 1.0, 7.0 Hz, 3H); <sup>13</sup>C NMR (100 MHz, CDCl<sub>3</sub>) δ 170.5, 153.5, 144.6, 138.8, 133.6, 131.0, 129.9, 129.0, 128.3, 127.8, 126.7, 125.0, 124.1, 119.6, 113.1, 113.0, 112.2, 110.6, 63.0, 60.8, 58.0, 51.8, 18.3, 14.6, 14.0; HRMS (ESI+) calcd for C<sub>25</sub>H<sub>24</sub>N<sub>5</sub>O [M+Na]<sup>+</sup> 432.1795, found 432.1793; The ee was determined by HPLC analysis (Daicel Chiralcel IA-3, hexane–*i*-PrOH = 98.4: 16, flow rate = 1.0 mL/min) *t*<sub>R</sub> = 12.3 (major enantiomer), 13.9 (minor) min.

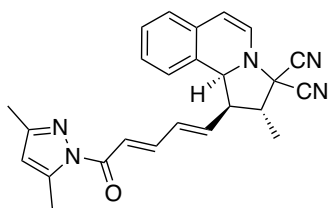

**(1R,2R,10bS)-(+)-1-((1E,3E)-5-(3,5-Dimethyl-1H-pyrazol-1-yl)-5-**

**oxopenta-1,3-dien-1-yl)-2-methyl-1,10b-dihydropyrrolo[2,1-a]isoquinoline-3,3(2H)-**

**dicarbonitrile (11aa):** 75% yield; Yellowish form;  $[\alpha]^{26}_D +33.5$  (86% ee, *c* 0.49, CHCl<sub>3</sub>); <sup>1</sup>H NMR (400 MHz, CDCl<sub>3</sub>) δ 7.41–7.29 (m, 2H), 7.20–7.12 (m, 1H), 7.11–6.99 (m, 2H), 6.84 (d, *J* = 8.0 Hz, 1H), 6.52–6.39 (m, 2H), 6.22 (dd, *J* = 10.0, 15.2 Hz, 1H), 5.99 (s, 1H), 5.81 (d, *J* = 8.0 Hz, 1H), 5.00 (d, *J* = 6.8 Hz, 1H), 3.12–3.02 (m, 1H), 2.82–2.70 (m, 1H), 2.56 (s, 3H), 2.27 (s, 3H), 1.53 (d, *J* = 7.2 Hz, 3H); <sup>13</sup>C NMR (100 MHz, CDCl<sub>3</sub>) δ 165.2, 152.1, 144.5, 144.4, 141.5, 131.9, 131.3, 128.3, 128.0, 127.1, 126.3, 125.4, 121.9, 113.4, 111.5, 111.4, 108.8, 61.5, 59.1, 51.6, 51.3, 16.0, 14.7, 13.9; HRMS (ESI+) calcd for C<sub>25</sub>H<sub>24</sub>N<sub>5</sub>O [M+H]<sup>+</sup> 410.1975, found 410.1987; The ee was determined by HPLC analysis (Daicel Chiralcel IA-3, hexane–*i*-PrOH = 95: 5, flow rate = 1.0 mL/min) *t*<sub>R</sub> = 24.6 (minor

enantiomer), 44.2 (major) min.

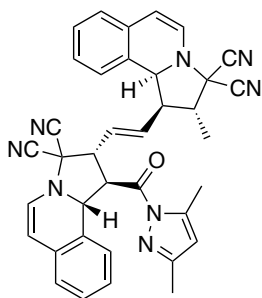

**(1R,2R,10bS)-(+)-1-((E)-2-((1R,2R,10bR)-3,3-Dicyano-1-(3,5-dimethyl-1H-pyrazole-1-carbonyl)-1,2,3,10b-tetrahydropyrrolo[2,1-a]isoquinolin-2-yl)vinyl)-2-methyl-**

**1,10b-dihydropyrrolo[2,1-a]isoquinoline-3,3(2H)-dicyanonitrile (12aa):** 11% yield; Yellowish form;  $[\alpha]_D^{24} +240.0$  (>99% ee,  $c$  0.98,  $\text{CHCl}_3$ );  $^1\text{H NMR}$  (400 MHz,  $\text{CDCl}_3$ )  $\delta$  7.23–6.79 (m, 6H), 6.84 (d,  $J = 7.6$  Hz, 1H), 6.65 (d,  $J = 7.2$  Hz, 1H), 6.39–6.29 (m, 2H), 6.12–6.01 (m, 2H), 5.96 (d,  $J = 7.6$  Hz, 1H), 5.86 (dd,  $J = 8.8, 15.6$  Hz, 1H), 5.78 (d,  $J = 7.2$  Hz, 1H), 5.38 (d,  $J = 8.8$  Hz, 1H), 5.26 (d,  $J = 8.6, 11.4$  Hz, 1H), 4.88 (d,  $J = 6.8$  Hz, 1H), 3.78 (dd,  $J = 8.6, 11.0$  Hz, 1H), 3.02–2.90 (m, 1H), 2.51 (s, 3H), 2.26 (s, 3H), 2.23–2.15 (m, 1H), 1.34 (d,  $J = 7.2$  Hz, 3H);  $^{13}\text{C NMR}$  (100 MHz,  $\text{CDCl}_3$ )  $\delta$  169.9, 153.6, 145.1, 138.5, 131.7, 130.8, 128.8, 128.4, 128.0, 127.7, 127.5, 126.4, 126.3, 125.3, 125.1, 123.9, 123.8, 113.4, 112.9, 112.5, 112.2, 111.3, 110.8, 109.1, 62.7, 60.9, 60.0, 58.8, 57.2, 51.9, 51.2, 50.5, 15.8, 14.7, 14.0; **HRMS** (ESI+) calcd for  $\text{C}_{37}\text{H}_{30}\text{N}_8\text{NaO}$   $[\text{M}+\text{Na}]^+$  625.2435, found 625.2441; The ee was determined by **HPLC** analysis (Daicel Chiralcel IA-3, hexane-*i*-PrOH = 98.4: 16, flow rate = 1.0 mL/min)  $t_R = 33.4$  (major enantiomer), 35.4 (minor) min.

### 9. NOE Analysis of 6aa, 6ab and 6ac

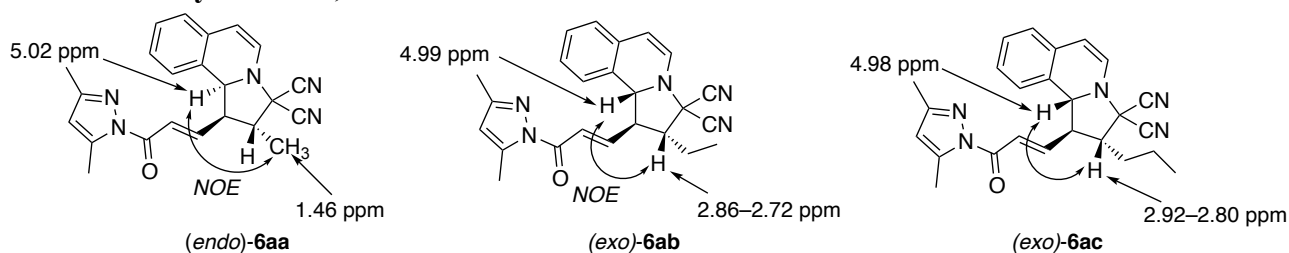

### 10. X-ray Diffraction Analysis of (1R,2S,10bR)-3de (Fig. 1)

(1R,2S,10bR)-**3de** (98% ee) was recrystallized in hexane- $\text{CH}_2\text{Cl}_2$  at ambient temperature to obtain a single crystal (>99% ee).

Crystal data of (1R,2S,10bR)-**3de** (Figure S1): Formula  $\text{C}_{25}\text{H}_{19}\text{BrN}_6\text{O}$ , colorless, monoclinic, space group  $P 1 21 1$ ,  $a = 8.2893(3)$  Å,  $b = 14.1630(4)$  Å,  $c = 10.0325(3)$  Å,  $\alpha = 90^\circ$ ,  $\beta = 103.686(3)^\circ$ ,  $\gamma = 90^\circ$ ,  $V = 1144.39(6)$  Å<sup>3</sup>,  $Z = 2$ ,  $\rho_{\text{calc}} = 1.449$  g/cm<sup>3</sup>,  $\lambda(\text{MoK}\alpha) = 0.71073$  Å,  $T = 123$  K. 9917 reflections collected, and 5540 parameters were used for the solution of the structure.  $R_1 = 0.0246$  and  $wR_2 = 0.0655$ . GOF = 10.75. Flack x parameter = 0.011(4). Crystallographic data (excluding

structure factors) for the structure reported in this paper have been deposited with the Cambridge Crystallographic Data Centre as supplementary publication no. CCDC-2325959. Copies of the data can be obtained free of charge on application to CCDC, 12 Union Road, Cambridge CB2 1EZ, UK [Fax: int. code + 44(1223)336-033; E-mail: [deposit@ccdc.cam.ac.uk](mailto:deposit@ccdc.cam.ac.uk); Web page: <http://www.ccdc.cam.ac.uk/pages/Home.aspx>].

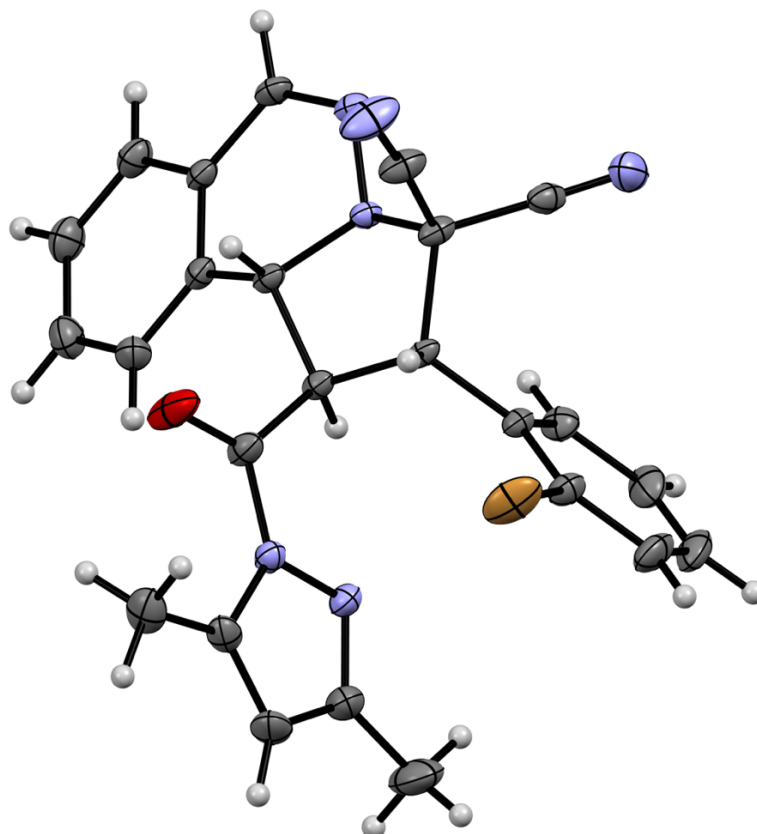

**Fig. S1** X-ray diffraction analysis of (1*R*,2*S*,10*bR*)-3de (ORTEP Drawing).

## 11. HOMO of 1a and LUMO of 4a

The LUMO/HOMO coefficients of compound **4a**, **4a•HCl**, **4a•Cu(OTf)<sub>2</sub>•4a** and **1a** were calculated using DFT calculations with RB3LYP with 6-31G(d) basis sets (6-311G\*\* for **4a•Cu(OTf)<sub>2</sub>•4a**; Spartan'18 for Macintosh). The molecular orbital coefficients are shown in below and the results are summarized in Table S1.

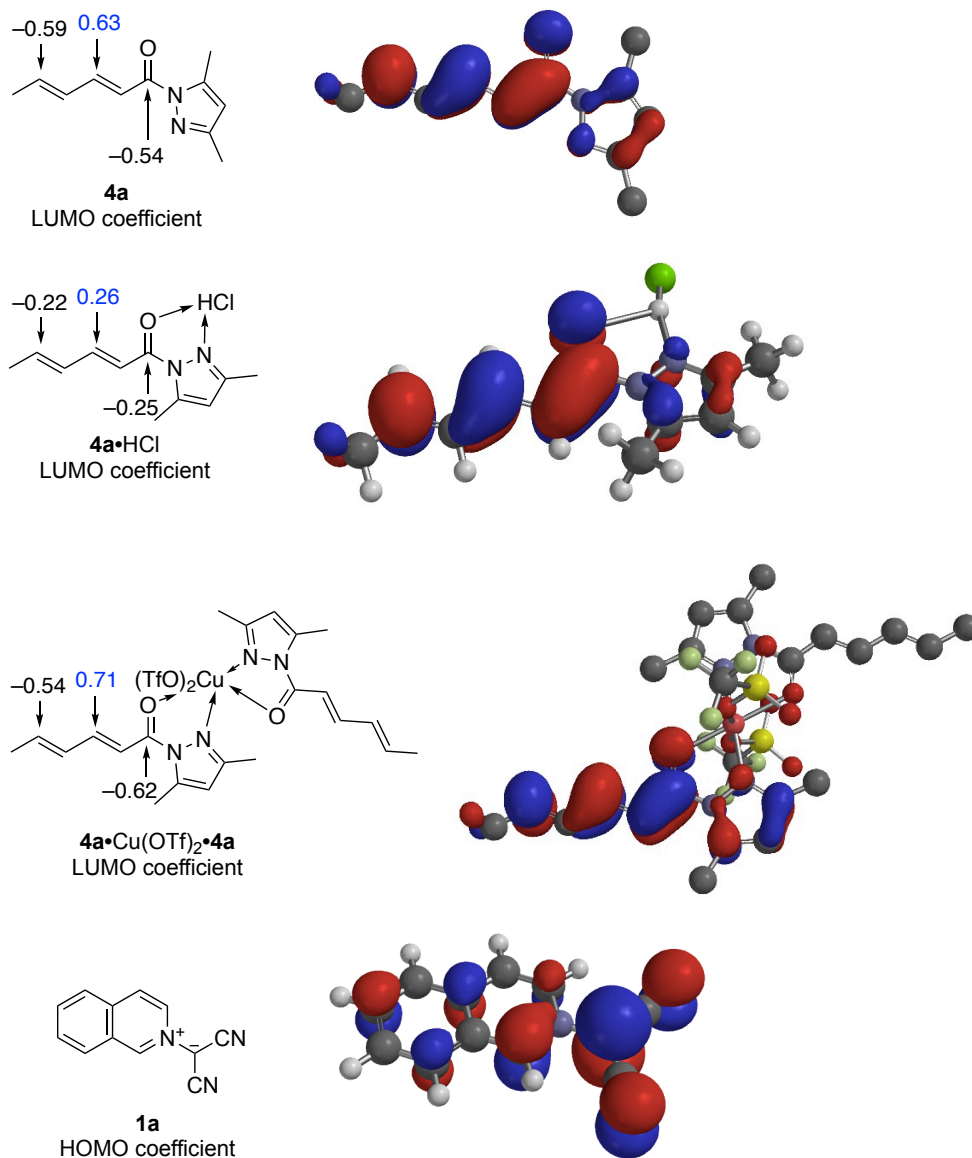

**Table S1** Summary of calculation for molecular orbital coefficients of **4a**, **4a•HCl**, **4a•Cu(OTf)<sub>2</sub>** and **1a**.

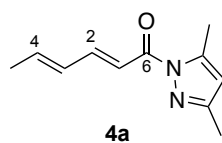

SPARTAN '18 Quantum Mechanics Program: (x86/Darwin)

build 1.3.0

Parallel Job: 8 threads

Job type: Geometry optimization.

Method: RB3LYP

Basis set: 6-31G(D)

Number of basis functions: 238

Number of electrons: 102

SCF model:

A restricted hybrid HF-DFT SCF calculation will be performed using Pulay DIIS + Geometric Direct Minimization

Optimization:

| Step | Energy      | Max Grad. | Max Dist. |
|------|-------------|-----------|-----------|
| 1    | -612.303619 | 0.018376  | 0.064515  |
| 2    | -612.305870 | 0.004914  | 0.015896  |
| 3    | -612.306083 | 0.000870  | 0.002602  |
| 4    | -612.306092 | 0.000530  | 0.003335  |

Reason for exit: Successful completion

Quantum Calculation CPU Time : 6:54.91

Quantum Calculation Wall Time: 59.22

SPARTAN '18 Properties Program: (x86/Darwin)

build 1.3.0

Use of molecular symmetry enabled

Cartesian Coordinates (Angstroms)

| Atom     | X          | Y          | Z          |
|----------|------------|------------|------------|
| 1 C C6   | -0.9648205 | 0.0000000  | -0.3179337 |
| 2 N N1   | -0.3666913 | 0.0000000  | -1.6055558 |
| 3 N N2   | 1.0012275  | 0.0000000  | -1.7415912 |
| 4 C C7   | 1.2188309  | 0.0000000  | -3.0456937 |
| 5 C C8   | -1.0110466 | 0.0000000  | -2.8338870 |
| 6 C C9   | -0.0062819 | 0.0000000  | -3.7713097 |
| 7 C C11  | 2.6168086  | 0.0000000  | -3.5934514 |
| 8 C C10  | -2.4935884 | 0.0000000  | -3.0273499 |
| 9 O O1   | -2.1833003 | 0.0000000  | -0.2158308 |
| 10 C C1  | -0.0323300 | 0.0000000  | 0.8205637  |
| 11 C C2  | -0.5211040 | 0.0000000  | 2.0795414  |
| 12 C C3  | 0.2960092  | 0.0000000  | 3.2726726  |
| 13 C C4  | -0.2145824 | 0.0000000  | 4.5187408  |
| 14 C C5  | 0.5906537  | 0.0000000  | 5.7801393  |
| 15 H H15 | -0.1327163 | 0.0000000  | -4.8455147 |
| 16 H H16 | 2.6059652  | 0.0000000  | -4.6871693 |
| 17 H H17 | 3.1716589  | 0.8827250  | -3.2567735 |
| 18 H H18 | 3.1716589  | -0.8827250 | -3.2567735 |
| 19 H H19 | -2.9615352 | -0.8758258 | -2.5683225 |
| 20 H H20 | -2.7132223 | 0.0000000  | -4.0994595 |
| 21 H H21 | -2.9615352 | 0.8758258  | -2.5683225 |
| 22 H H22 | 1.0307441  | 0.0000000  | 0.6154028  |
| 23 H H23 | -1.6030333 | 0.0000000  | 2.2075054  |
| 24 H H24 | 1.3779790  | 0.0000000  | 3.1369784  |
| 25 H H25 | -1.2995823 | 0.0000000  | 4.6342113  |
| 26 H H26 | 0.3588784  | -0.8793435 | 6.3970875  |
| 27 H H27 | 0.3588784  | 0.8793435  | 6.3970875  |
| 28 H H28 | 1.6660772  | 0.0000000  | 5.5750077  |

MO:

| Eigenvalues: | 51       | 52       | 53       | 54      | 55       |
|--------------|----------|----------|----------|---------|----------|
| (ev)         | -0.23062 | -0.06568 | -0.00114 | 0.05490 | 0.07647  |
|              | -6.27552 | -1.78726 | -0.03103 | 1.49398 | 2.08091  |
|              | A*       | A*       | A*       | A*      | A*       |
| 1 C6 S1      | 0.00000  | 0.00000  | 0.00000  | 0.00000 | 0.00000  |
| 2 C6 S       | 0.00000  | 0.00000  | 0.00000  | 0.00000 | 0.00000  |
| 3 C6 PX      | 0.00000  | 0.00000  | 0.00000  | 0.00000 | 0.00000  |
| 4 C6 PY      | 0.02252  | -0.28289 | -0.17641 | 0.25157 | -0.06969 |
| 5 C6 PZ      | 0.00000  | 0.00000  | 0.00000  | 0.00000 | 0.00000  |
| 6 C6 S'      | 0.00000  | 0.00000  | 0.00000  | 0.00000 | 0.00000  |
| 7 C6 PX'     | 0.00000  | 0.00000  | 0.00000  | 0.00000 | 0.00000  |
| 8 C6 PY'     | 0.00853  | -0.22194 | -0.14964 | 0.21676 | -0.07250 |
| 9 C6 PZ'     | 0.00000  | 0.00000  | 0.00000  | 0.00000 | 0.00000  |
| 10 C6 DXX    | 0.00000  | 0.00000  | 0.00000  | 0.00000 | 0.00000  |
| 11 C6 DYY    | 0.00000  | 0.00000  | 0.00000  | 0.00000 | 0.00000  |
| 12 C6 DZZ    | 0.00000  | 0.00000  | 0.00000  | 0.00000 | 0.00000  |
| 13 C6 DXY    | 0.01526  | -0.02558 | -0.00723 | 0.00800 | 0.00106  |
| 14 C6 DXZ    | 0.00000  | 0.00000  | 0.00000  | 0.00000 | 0.00000  |
| 15 C6 DYZ    | 0.01319  | -0.00677 | 0.02038  | 0.00835 | -0.00461 |
| 16 N1 S1     | 0.00000  | 0.00000  | 0.00000  | 0.00000 | 0.00000  |
| 17 N1 S      | 0.00000  | 0.00000  | 0.00000  | 0.00000 | 0.00000  |
| 18 N1 PX     | 0.00000  | 0.00000  | 0.00000  | 0.00000 | 0.00000  |

|           |          |          |          |          |          |
|-----------|----------|----------|----------|----------|----------|
| 19 N1 PY  | -0.08835 | 0.05819  | -0.21173 | -0.23687 | 0.10183  |
| 20 N1 PZ  | 0.00000  | 0.00000  | 0.00000  | 0.00000  | 0.00000  |
| 21 N1 S'  | 0.00000  | 0.00000  | 0.00000  | 0.00000  | 0.00000  |
| 22 N1 PX' | 0.00000  | 0.00000  | 0.00000  | 0.00000  | 0.00000  |
| 23 N1 PY' | -0.06962 | 0.03340  | -0.24215 | -0.24160 | 0.12716  |
| 24 N1 PZ' | 0.00000  | 0.00000  | 0.00000  | 0.00000  | 0.00000  |
| 25 N1 DXX | 0.00000  | 0.00000  | 0.00000  | 0.00000  | 0.00000  |
| 26 N1 DYY | 0.00000  | 0.00000  | 0.00000  | 0.00000  | 0.00000  |
| 27 N1 DZZ | 0.00000  | 0.00000  | 0.00000  | 0.00000  | 0.00000  |
| 28 N1 DXY | -0.00430 | 0.00503  | 0.01194  | 0.00523  | 0.02180  |
| 29 N1 DXZ | 0.00000  | 0.00000  | 0.00000  | 0.00000  | 0.00000  |
| 30 N1 DYZ | -0.00169 | -0.01864 | -0.02006 | 0.01067  | 0.01184  |
| 31 N2 S1  | 0.00000  | 0.00000  | 0.00000  | 0.00000  | 0.00000  |
| 32 N2 S   | 0.00000  | 0.00000  | 0.00000  | 0.00000  | 0.00000  |
| 33 N2 PX  | 0.00000  | 0.00000  | 0.00000  | 0.00000  | 0.00000  |
| 34 N2 PY  | -0.10110 | 0.10543  | 0.28351  | 0.19580  | 0.15155  |
| 35 N2 PZ  | 0.00000  | 0.00000  | 0.00000  | 0.00000  | 0.00000  |
| 36 N2 S'  | 0.00000  | 0.00000  | 0.00000  | 0.00000  | 0.00000  |
| 37 N2 PX' | 0.00000  | 0.00000  | 0.00000  | 0.00000  | 0.00000  |
| 38 N2 PY' | -0.06677 | 0.08273  | 0.32316  | 0.25334  | 0.20607  |
| 39 N2 PZ' | 0.00000  | 0.00000  | 0.00000  | 0.00000  | 0.00000  |
| 40 N2 DXX | 0.00000  | 0.00000  | 0.00000  | 0.00000  | 0.00000  |
| 41 N2 DYY | 0.00000  | 0.00000  | 0.00000  | 0.00000  | 0.00000  |
| 42 N2 DZZ | 0.00000  | 0.00000  | 0.00000  | 0.00000  | 0.00000  |
| 43 N2 DXY | 0.00554  | -0.00621 | -0.00155 | 0.00374  | -0.01610 |
| 44 N2 DXZ | 0.00000  | 0.00000  | 0.00000  | 0.00000  | 0.00000  |
| 45 N2 DYZ | 0.00217  | -0.00168 | -0.00157 | 0.00204  | 0.01424  |
| 46 C7 S1  | 0.00000  | 0.00000  | 0.00000  | 0.00000  | 0.00000  |
| 47 C7 S   | 0.00000  | 0.00000  | 0.00000  | 0.00000  | 0.00000  |
| 48 C7 PX  | 0.00000  | 0.00000  | 0.00000  | 0.00000  | 0.00000  |
| 49 C7 PY  | 0.02557  | -0.09771 | -0.22120 | -0.17073 | -0.35725 |
| 50 C7 PZ  | 0.00000  | 0.00000  | 0.00000  | 0.00000  | 0.00000  |
| 51 C7 S'  | 0.00000  | 0.00000  | 0.00000  | 0.00000  | 0.00000  |
| 52 C7 PX' | 0.00000  | 0.00000  | 0.00000  | 0.00000  | 0.00000  |
| 53 C7 PY' | 0.00707  | -0.06317 | -0.21901 | -0.21956 | -0.46165 |
| 54 C7 PZ' | 0.00000  | 0.00000  | 0.00000  | 0.00000  | 0.00000  |
| 55 C7 DXX | 0.00000  | 0.00000  | 0.00000  | 0.00000  | 0.00000  |
| 56 C7 DYY | 0.00000  | 0.00000  | 0.00000  | 0.00000  | 0.00000  |
| 57 C7 DZZ | 0.00000  | 0.00000  | 0.00000  | 0.00000  | 0.00000  |
| 58 C7 DXY | -0.00397 | 0.00183  | 0.00260  | -0.00204 | -0.01943 |
| 59 C7 DXZ | 0.00000  | 0.00000  | 0.00000  | 0.00000  | 0.00000  |
| 60 C7 DYZ | -0.00750 | 0.00923  | 0.02130  | 0.01129  | -0.00304 |
| 61 C8 S1  | 0.00000  | 0.00000  | 0.00000  | 0.00000  | 0.00000  |
| 62 C8 S   | 0.00000  | 0.00000  | 0.00000  | 0.00000  | 0.00000  |
| 63 C8 PX  | 0.00000  | 0.00000  | 0.00000  | 0.00000  | 0.00000  |
| 64 C8 PY  | 0.08842  | 0.12093  | 0.30544  | 0.09063  | -0.30861 |
| 65 C8 PZ  | 0.00000  | 0.00000  | 0.00000  | 0.00000  | 0.00000  |
| 66 C8 S'  | 0.00000  | 0.00000  | 0.00000  | 0.00000  | 0.00000  |
| 67 C8 PX' | 0.00000  | 0.00000  | 0.00000  | 0.00000  | 0.00000  |
| 68 C8 PY' | 0.04903  | 0.14884  | 0.34211  | 0.07541  | -0.42683 |
| 69 C8 PZ' | 0.00000  | 0.00000  | 0.00000  | 0.00000  | 0.00000  |
| 70 C8 DXX | 0.00000  | 0.00000  | 0.00000  | 0.00000  | 0.00000  |
| 71 C8 DYY | 0.00000  | 0.00000  | 0.00000  | 0.00000  | 0.00000  |
| 72 C8 DZZ | 0.00000  | 0.00000  | 0.00000  | 0.00000  | 0.00000  |
| 73 C8 DXY | 0.00369  | 0.00034  | -0.00591 | -0.00527 | 0.01810  |
| 74 C8 DXZ | 0.00000  | 0.00000  | 0.00000  | 0.00000  | 0.00000  |
| 75 C8 DYZ | -0.00704 | 0.00625  | -0.00732 | -0.01695 | -0.01496 |
| 76 C9 S1  | 0.00000  | 0.00000  | 0.00000  | 0.00000  | 0.00000  |
| 77 C9 S   | 0.00000  | 0.00000  | 0.00000  | 0.00000  | 0.00000  |
| 78 C9 PX  | 0.00000  | 0.00000  | 0.00000  | 0.00000  | 0.00000  |
| 79 C9 PY  | 0.13600  | -0.09225 | -0.09852 | 0.05998  | 0.39448  |
| 80 C9 PZ  | 0.00000  | 0.00000  | 0.00000  | 0.00000  | 0.00000  |
| 81 C9 S'  | 0.00000  | 0.00000  | 0.00000  | 0.00000  | 0.00000  |
| 82 C9 PX' | 0.00000  | 0.00000  | 0.00000  | 0.00000  | 0.00000  |
| 83 C9 PY' | 0.11289  | -0.11839 | -0.14028 | 0.09043  | 0.61752  |
| 84 C9 PZ' | 0.00000  | 0.00000  | 0.00000  | 0.00000  | 0.00000  |
| 85 C9 DXX | 0.00000  | 0.00000  | 0.00000  | 0.00000  | 0.00000  |
| 86 C9 DYY | 0.00000  | 0.00000  | 0.00000  | 0.00000  | 0.00000  |
| 87 C9 DZZ | 0.00000  | 0.00000  | 0.00000  | 0.00000  | 0.00000  |
| 88 C9 DXY | -0.00178 | -0.00793 | -0.02313 | -0.01444 | -0.00465 |
| 89 C9 DXZ | 0.00000  | 0.00000  | 0.00000  | 0.00000  | 0.00000  |
| 90 C9 DYZ | 0.00321  | 0.00238  | 0.00554  | -0.00180 | -0.01857 |





235 H27 S 0.07055 0.05628 -0.04105 0.04877 -0.00894  
 236 H27 S' 0.09815 0.12054 -0.10375 0.13037 -0.02435

237 H28 S 0.00000 0.00000 0.00000 0.00000 0.00000  
 238 H28 S' 0.00000 0.00000 0.00000 0.00000 0.00000

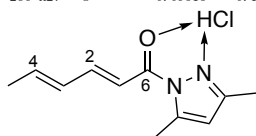

**4a•HCl**

SPARTAN '18 Quantum Mechanics Program: (x86/Darwin) build 1.3.0

Job type: Geometry optimization.

Method: RB3LYP

Basis set: 6-31G(D)

Number of basis functions: 259

Number of electrons: 120

Parallel Job: 8 threads

SCF model:

A restricted hybrid HF-DFT SCF calculation will be performed using Pulay DIIS + Geometric Direct Minimization

Optimization:

| Step | Energy       | Max Grad. | Max Dist. |
|------|--------------|-----------|-----------|
| 1    | -1072.823833 | 0.130926  | 0.156773  |
| 2    | -1072.894278 | 0.100359  | 0.164955  |
| 3    | -1072.945216 | 0.075410  | 0.162483  |
| 4    | -1072.982635 | 0.055150  | 0.159841  |
| 5    | -1073.009282 | 0.039189  | 0.149404  |
| 6    | -1073.028516 | 0.027172  | 0.133966  |
| 7    | -1073.043005 | 0.018038  | 0.114815  |
| 8    | -1073.054732 | 0.013077  | 0.118709  |
| 9    | -1073.064912 | 0.012859  | 0.123393  |
| 10   | -1073.074069 | 0.012215  | 0.126609  |
| 11   | -1073.082204 | 0.010932  | 0.130875  |
| 12   | -1073.088853 | 0.008209  | 0.133658  |
| 13   | -1073.093294 | 0.006332  | 0.132882  |
| 14   | -1073.095702 | 0.008822  | 0.113862  |
| 15   | -1073.097415 | 0.008134  | 0.110163  |
| 16   | -1073.098827 | 0.005603  | 0.111118  |
| 17   | -1073.099887 | 0.003244  | 0.116913  |
| 18   | -1073.100551 | 0.001553  | 0.144373  |
| 19   | -1073.100958 | 0.000846  | 0.154690  |
| 20   | -1073.101241 | 0.000826  | 0.169536  |
| 21   | -1073.101467 | 0.000866  | 0.132014  |
| 22   | -1073.101681 | 0.001374  | 0.130523  |
| 23   | -1073.101926 | 0.001026  | 0.120991  |
| 24   | -1073.102250 | 0.001613  | 0.129436  |
| 25   | -1073.102632 | 0.002290  | 0.137072  |
| 26   | -1073.102959 | 0.001303  | 0.146188  |
| 27   | -1073.103140 | 0.000661  | 0.091098  |
| 28   | -1073.103232 | 0.000886  | 0.102457  |
| 29   | -1073.103315 | 0.001053  | 0.072466  |
| 30   | -1073.103355 | 0.000642  | 0.047352  |
| 31   | -1073.103379 | 0.000407  | 0.032468  |
| 32   | -1073.103395 | 0.000337  | 0.081692  |

Reason for exit: Successful completion

Quantum Calculation CPU Time : 1:12:05.17

Quantum Calculation Wall Time: 9:33.39

SPARTAN '18 Properties Program: (x86/Darwin) build 1.3.0

Use of molecular symmetry disabled

Cartesian Coordinates (Angstroms)

| Atom   | X         | Y          | Z          |
|--------|-----------|------------|------------|
| 1 C C1 | 0.4338406 | -0.2118767 | -5.9455800 |
| 2 C C2 | 0.9096536 | 0.1245998  | -4.5681559 |

|           |            |            |            |
|-----------|------------|------------|------------|
| 3 C C3    | 0.2512824  | -0.1584856 | -3.4274147 |
| 4 C C4    | 0.7607832  | 0.1827586  | -2.1197729 |
| 5 C C5    | 0.1336641  | -0.0918903 | -0.9535957 |
| 6 C C6    | 0.7788875  | 0.2550000  | 0.3210752  |
| 7 O O1    | 1.9287818  | 0.6318832  | 0.4222299  |
| 8 N N2    | -0.0064517 | 0.0789064  | 1.5153307  |
| 9 N N1    | 0.6834009  | -0.0863828 | 2.6861258  |
| 10 C C10  | -0.2223708 | -0.1430270 | 3.6484066  |
| 11 C C11  | -1.3715449 | 0.1569871  | 1.7505208  |
| 12 C C12  | -1.5278630 | 0.0135895  | 3.1085345  |
| 13 C C13  | 0.1771866  | -0.3583500 | 5.0756578  |
| 14 C C14  | -2.4370446 | 0.4101048  | 0.7278169  |
| 15 H H2   | 2.5382269  | -0.0407444 | 2.9100588  |
| 16 C1 C11 | 3.7720781  | -0.1421979 | 3.3843425  |
| 17 H H17  | 0.3371996  | 0.6940449  | -6.5592465 |
| 18 H H18  | 1.1560599  | -0.8594515 | -6.4611163 |
| 19 H H19  | -0.5345731 | -0.7217530 | -5.9284608 |
| 20 H H20  | 1.8697454  | 0.6377351  | -4.4977023 |
| 21 H H21  | -0.7084514 | -0.6739046 | -3.4753142 |
| 22 H H22  | 1.7211828  | 0.6936128  | -2.0680753 |
| 23 H H23  | -0.8150823 | -0.6148446 | -0.9492940 |
| 24 H H24  | -2.4646053 | 0.0357026  | 3.6487006  |
| 25 H H25  | 1.2652903  | -0.3608346 | 5.1738770  |
| 26 H H26  | -0.2309381 | 0.4297318  | 5.7188910  |
| 27 H H27  | -0.2047965 | -1.3163375 | 5.4488430  |
| 28 H H28  | -2.1655200 | 1.2070177  | 0.0283869  |
| 29 H H29  | -3.3514217 | 0.7124239  | 1.2454977  |
| 30 H H30  | -2.6766005 | -0.4840174 | 0.1394327  |

| M0:          | 61       | 62       | 63      | 64      | 65      |
|--------------|----------|----------|---------|---------|---------|
| Eigenvalues: | -0.08312 | -0.01248 | 0.03837 | 0.05404 | 0.07493 |
| (ev)         | -2.26174 | -0.33956 | 1.04407 | 1.47048 | 2.03897 |

|           | A        | A        | A        | A        | A        |
|-----------|----------|----------|----------|----------|----------|
| 1 C1 S1   | 0.00008  | 0.00041  | -0.00037 | -0.00035 | -0.00380 |
| 2 C1 S    | -0.00068 | -0.00099 | 0.00179  | 0.00207  | 0.01281  |
| 3 C1 PX   | -0.01294 | 0.00087  | 0.00901  | 0.00272  | 0.04597  |
| 4 C1 PY   | 0.02387  | -0.00280 | -0.01211 | 0.00073  | 0.03259  |
| 5 C1 PZ   | -0.00180 | -0.00133 | 0.00147  | 0.00171  | -0.00286 |
| 6 C1 S'   | 0.00337  | -0.00433 | -0.00574 | -0.01209 | -0.01877 |
| 7 C1 PX'  | 0.00617  | -0.00895 | 0.00187  | 0.00204  | 0.10091  |
| 8 C1 PY'  | -0.01239 | 0.01299  | 0.00617  | 0.00134  | 0.01613  |
| 9 C1 PZ'  | 0.00266  | -0.00209 | -0.00673 | -0.00444 | -0.03507 |
| 10 C1 DXX | 0.00139  | -0.00194 | 0.00323  | 0.00019  | 0.00104  |
| 11 C1 DYY | -0.00315 | 0.00320  | -0.00455 | -0.00004 | 0.00238  |
| 12 C1 DZZ | 0.00181  | -0.00122 | 0.00118  | -0.00034 | -0.00458 |
| 13 C1 DXY | -0.00056 | 0.00099  | -0.00178 | -0.00013 | 0.00252  |
| 14 C1 DXZ | 0.00834  | -0.00677 | 0.00824  | 0.00021  | -0.00015 |
| 15 C1 DYZ | -0.01539 | 0.01239  | -0.01473 | -0.00060 | 0.00515  |
| 16 C2 S1  | -0.00019 | -0.00061 | -0.00178 | -0.00072 | -0.02042 |
| 17 C2 S   | 0.00085  | 0.00097  | 0.00225  | 0.00158  | 0.03302  |
| 18 C2 PX  | 0.13717  | -0.10247 | 0.11725  | 0.00507  | 0.05084  |
| 19 C2 PY  | -0.25880 | 0.19166  | -0.21037 | -0.00653 | 0.10436  |
| 20 C2 PZ  | 0.01574  | -0.01054 | 0.01576  | 0.00417  | 0.01908  |
| 21 C2 S'  | -0.01153 | -0.00140 | 0.04073  | 0.02300  | 0.29417  |
| 22 C2 PX' | 0.14369  | -0.13016 | 0.18282  | -0.00810 | 0.05678  |
| 23 C2 PY' | -0.25905 | 0.24307  | -0.35543 | -0.02160 | 0.20994  |
| 24 C2 PZ' | 0.01547  | -0.01774 | 0.02205  | -0.00636 | -0.05035 |
| 25 C2 DXX | 0.00129  | -0.00426 | 0.00914  | -0.00009 | -0.01195 |
| 26 C2 DYY | -0.00086 | 0.00359  | -0.00870 | -0.00048 | 0.00034  |
| 27 C2 DZZ | -0.00056 | 0.00028  | -0.00066 | 0.00042  | 0.00797  |
| 28 C2 DXY | -0.00092 | 0.00368  | -0.00809 | -0.00057 | 0.00097  |
| 29 C2 DXZ | -0.00173 | 0.00364  | -0.00642 | 0.00036  | 0.00312  |



|         |     |          |          |          |          |          |         |     |          |          |          |          |          |
|---------|-----|----------|----------|----------|----------|----------|---------|-----|----------|----------|----------|----------|----------|
| 174 C12 | PZ' | 0.03047  | 0.00972  | -0.04619 | -0.01214 | -0.06022 | 217 C11 | PZ2 | 0.00378  | 0.00157  | -0.00379 | 0.00109  | -0.00210 |
| 175 C12 | DXX | -0.00016 | -0.00090 | -0.00120 | 0.00049  | -0.00170 | 218 C11 | S   | 0.00194  | -0.00247 | -0.00968 | 0.00644  | -0.00307 |
| 176 C12 | DYY | 0.00261  | 0.00533  | 0.00305  | -0.00188 | 0.00165  | 219 C11 | PX  | 0.00253  | 0.01085  | 0.01327  | -0.01201 | -0.00005 |
| 177 C12 | DZZ | -0.00194 | -0.00499 | -0.00290 | 0.00026  | -0.00166 | 220 C11 | PY  | -0.00615 | -0.01811 | -0.01526 | 0.00936  | -0.00328 |
| 178 C12 | DXY | -0.00273 | -0.00766 | -0.00697 | 0.01954  | -0.00291 | 221 C11 | PZ  | -0.01122 | -0.00541 | 0.01113  | -0.00246 | 0.00695  |
| 179 C12 | DXZ | -0.00226 | -0.00373 | 0.00066  | 0.00233  | 0.00468  | 222 C11 | S'  | 0.00016  | -0.01307 | -0.02527 | 0.02071  | 0.00017  |
| 180 C12 | DYZ | -0.00729 | -0.02017 | -0.01222 | -0.00316 | 0.00092  | 223 C11 | PX' | 0.00054  | 0.01561  | 0.02967  | -0.02448 | 0.00264  |
| 181 C13 | S1  | 0.00171  | 0.00021  | -0.00402 | 0.00329  | 0.00208  | 224 C11 | PY' | 0.00066  | 0.00214  | 0.00170  | 0.00009  | 0.00138  |
| 182 C13 | S   | -0.00441 | -0.00076 | 0.00778  | -0.00653 | -0.00194 | 225 C11 | PZ' | 0.00021  | 0.00729  | 0.00903  | -0.01027 | -0.00289 |
| 183 C13 | PX  | 0.00107  | -0.00060 | -0.00431 | 0.00302  | 0.00253  | 226 C11 | DXX | 0.00108  | 0.00187  | 0.00153  | -0.00253 | -0.00039 |
| 184 C13 | PY  | 0.01226  | 0.01407  | 0.00155  | 0.06815  | -0.00662 | 227 C11 | DYY | 0.00019  | -0.00036 | -0.00129 | 0.00111  | -0.00027 |
| 185 C13 | PZ  | 0.00803  | 0.00291  | -0.00499 | 0.01693  | 0.00859  | 228 C11 | DZZ | -0.00024 | -0.00044 | -0.00040 | 0.00068  | -0.00005 |
| 186 C13 | S'  | 0.00561  | 0.00609  | 0.03445  | -0.03015 | -0.02635 | 229 C11 | DXY | -0.00032 | -0.00161 | -0.00165 | 0.00150  | -0.00016 |
| 187 C13 | PX' | -0.00433 | -0.01663 | -0.01076 | -0.00562 | 0.01534  | 230 C11 | DXZ | -0.00007 | 0.00040  | 0.00156  | -0.00158 | 0.00009  |
| 188 C13 | PY' | 0.00502  | 0.01666  | 0.01571  | 0.25310  | -0.00766 | 231 C11 | DYZ | -0.00003 | -0.00037 | -0.00054 | 0.00068  | -0.00013 |
| 189 C13 | PZ' | -0.00033 | 0.00461  | 0.00817  | 0.04508  | 0.02586  | 232 H17 | S   | 0.05712  | -0.04193 | 0.04637  | 0.00191  | -0.01751 |
| 190 C13 | DXX | 0.00029  | 0.00087  | 0.00093  | -0.00120 | 0.00017  | 233 H17 | S'  | 0.11863  | -0.10172 | 0.11411  | 0.00239  | -0.11368 |
| 191 C13 | DYY | -0.00166 | -0.00375 | -0.00250 | 0.00798  | -0.00004 | 234 H18 | S   | -0.05736 | 0.04258  | -0.04715 | -0.00133 | 0.00615  |
| 192 C13 | DZZ | 0.00186  | 0.00290  | 0.00088  | -0.00644 | 0.00070  | 235 H18 | S'  | -0.11837 | 0.10557  | -0.12576 | -0.00597 | -0.07531 |
| 193 C13 | DXY | 0.00068  | 0.00251  | 0.00154  | 0.00169  | -0.00034 | 236 H19 | S   | 0.00021  | -0.00039 | 0.00118  | -0.00009 | 0.01603  |
| 194 C13 | DXZ | -0.00012 | 0.00068  | 0.00142  | -0.00106 | 0.00063  | 237 H19 | S'  | -0.00029 | -0.00098 | 0.00806  | 0.00539  | 0.18284  |
| 195 C13 | DYZ | 0.00561  | 0.01172  | 0.00708  | -0.02764 | 0.00076  | 238 H20 | S   | 0.00052  | 0.00031  | -0.00206 | -0.00222 | -0.03674 |
| 196 C14 | S1  | -0.00677 | 0.00212  | 0.01328  | 0.00001  | 0.07036  | 239 H20 | S'  | -0.00065 | 0.00149  | -0.02274 | -0.00563 | -0.45743 |
| 197 C14 | S   | 0.01878  | -0.00465 | -0.02083 | 0.00240  | -0.07647 | 240 H21 | S   | -0.00027 | -0.00009 | -0.00127 | 0.00082  | 0.02683  |
| 198 C14 | PX  | 0.01393  | 0.00428  | 0.00912  | -0.01315 | 0.05940  | 241 H21 | S'  | 0.00240  | 0.00702  | 0.05130  | 0.05825  | 0.64095  |
| 199 C14 | PY  | 0.00993  | 0.00450  | 0.02917  | 0.04519  | 0.10978  | 242 H22 | S   | -0.00171 | -0.00037 | -0.00389 | 0.00087  | -0.05151 |
| 200 C14 | PZ  | -0.01654 | 0.01515  | 0.01926  | 0.03479  | 0.06191  | 243 H22 | S'  | 0.01451  | 0.00243  | -0.04927 | -0.02229 | -0.40506 |
| 201 C14 | S'  | 0.05328  | -0.01558 | -0.17548 | -0.01425 | -1.11008 | 244 H23 | S   | -0.00647 | -0.00785 | 0.01325  | 0.01111  | 0.05116  |
| 202 C14 | PX' | -0.03596 | 0.04282  | 0.06675  | -0.07454 | 0.08718  | 245 H23 | S'  | 0.00118  | -0.00980 | 0.17077  | 0.06140  | 1.00491  |
| 203 C14 | PY' | 0.05025  | 0.06765  | 0.13491  | 0.10950  | 0.33742  | 246 H24 | S   | 0.00494  | 0.00291  | -0.00717 | -0.00401 | -0.01505 |
| 204 C14 | PZ' | -0.00894 | 0.00448  | 0.05422  | 0.10736  | 0.19481  | 247 H24 | S'  | -0.00054 | 0.00084  | -0.03344 | -0.08645 | 0.02320  |
| 205 C14 | DXX | -0.00060 | 0.00185  | 0.00091  | -0.00007 | 0.00341  | 248 H25 | S   | 0.00066  | 0.00351  | 0.00538  | -0.00708 | 0.00168  |
| 206 C14 | DYY | 0.00135  | -0.00396 | -0.00190 | -0.00155 | 0.00810  | 249 H25 | S'  | 0.00433  | 0.01800  | 0.01101  | -0.00657 | -0.00067 |
| 207 C14 | DZZ | 0.00045  | 0.00217  | 0.00369  | 0.00150  | 0.00871  | 250 H26 | S   | 0.01992  | 0.03460  | 0.01638  | -0.07941 | 0.00173  |
| 208 C14 | DXY | 0.00406  | 0.01137  | 0.00644  | 0.01277  | -0.00584 | 251 H26 | S'  | 0.03209  | 0.04440  | -0.00037 | -0.39973 | 0.01389  |
| 209 C14 | DXZ | 0.00350  | 0.00448  | 0.00170  | 0.00565  | -0.00293 | 252 H27 | S   | -0.01961 | -0.03802 | -0.02259 | 0.08637  | -0.00257 |
| 210 C14 | DYZ | 0.00427  | 0.01739  | 0.01190  | 0.01204  | 0.00153  | 253 H27 | S'  | -0.02814 | -0.06249 | -0.06130 | 0.44216  | -0.01753 |
| 211 H2  | S   | 0.00268  | 0.00718  | 0.00806  | -0.01101 | -0.00146 | 254 H28 | S   | -0.00482 | -0.05535 | -0.03619 | -0.03674 | 0.00613  |
| 212 H2  | S'  | -0.00836 | 0.01890  | 0.05734  | -0.03956 | 0.00674  | 255 H28 | S'  | -0.08787 | -0.15635 | -0.08638 | -0.07175 | 0.21161  |
| 213 C11 | S1  | 0.00011  | -0.00034 | -0.00089 | 0.00066  | -0.00019 | 256 H29 | S   | -0.01839 | -0.01155 | -0.00562 | -0.02321 | 0.01422  |
| 214 C11 | S2  | -0.00011 | 0.00196  | 0.00392  | -0.00322 | 0.00049  | 257 H29 | S'  | -0.07609 | -0.01688 | 0.03246  | -0.21202 | 0.30751  |
| 215 C11 | PX2 | -0.00109 | -0.00418 | -0.00494 | 0.00458  | 0.00000  | 258 H30 | S   | 0.02603  | 0.06390  | 0.04731  | 0.05736  | 0.02150  |
| 216 C11 | PY2 | 0.00208  | 0.00600  | 0.00495  | -0.00310 | 0.00101  | 259 H30 | S'  | 0.05708  | 0.21892  | 0.31471  | 0.29216  | 0.83979  |

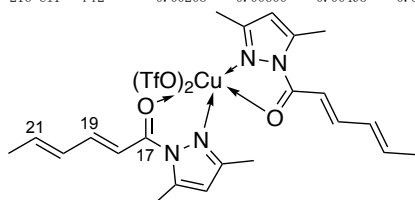

**4a·Cu(OTf)<sub>2</sub>·4a**

SPARTAN '18 Quantum Mechanics Program: (x86/Darwin) build 1.3.0

|    |              |          |          |
|----|--------------|----------|----------|
| 4  | -4788.810099 | 0.018370 | 0.064226 |
| 5  | -4788.812929 | 0.011941 | 0.077012 |
| 6  | -4788.814283 | 0.007557 | 0.119958 |
| 7  | -4788.814875 | 0.004871 | 0.038904 |
| 8  | -4788.815046 | 0.002814 | 0.038054 |
| 9  | -4788.815140 | 0.002109 | 0.015197 |
| 10 | -4788.815197 | 0.001544 | 0.019733 |
| 11 | -4788.815226 | 0.001057 | 0.020112 |
| 12 | -4788.815195 | 0.000730 | 0.015057 |
| 13 | -4788.815265 | 0.000665 | 0.030911 |
| 14 | -4788.815273 | 0.000489 | 0.015099 |

Job type: Geometry optimization.

Method: UB3LYP

Basis set: 6-311G\*\*

Number of basis functions: 1014

Number of electrons: 379 (1 unpaired)

Parallel Job: 8 threads

SCF model:

An unrestricted hybrid HF-DFT SCF calculation will be performed using Pulay DIIS + Geometric Direct Minimization

Reason for exit: Successful completion

Quantum Calculation CPU Time : 53:00:09.84

Quantum Calculation Wall Time: 6:49:48.46

Optimization:

| Step | Energy       | Max Grad. | Max Dist. |
|------|--------------|-----------|-----------|
| 1    | -4788.717519 | 0.097541  | 0.163819  |
| 2    | -4788.771084 | 0.064680  | 0.155669  |
| 3    | -4788.799830 | 0.033522  | 0.113838  |

SPARTAN '18 Properties Program: (x86/Darwin)

build 1.3.0

Use of molecular symmetry enabled

| Atom      | Cartesian Coordinates (Angstroms) |            |            |
|-----------|-----------------------------------|------------|------------|
|           | X                                 | Y          | Z          |
| 1 N N1    | 1.9106751                         | 0.0000001  | -0.7304400 |
| 2 C C2    | 3.1074934                         | -0.0000009 | -0.1761514 |
| 3 C C3    | 4.0928643                         | -0.0000015 | -1.1905566 |
| 4 C C4    | 3.4310050                         | -0.0000009 | -2.3918266 |
| 5 N N2    | 2.0801197                         | 0.0000002  | -2.0887339 |
| 6 C C1    | 0.8819120                         | 0.0000010  | -2.8639818 |
| 7 C C5    | 0.9675530                         | 0.0000035  | -4.3167456 |
| 8 O O1    | -0.1786319                        | -0.0000001 | -2.2588862 |
| 9 C C7    | -0.1698259                        | -0.0000008 | -5.0451798 |
| 10 C C8   | -0.2227965                        | 0.0000024  | -6.4841672 |
| 11 C C9   | -1.3817797                        | -0.0000024 | -7.1652179 |
| 12 C C10  | -1.5143974                        | 0.0000011  | -8.6517922 |
| 13 C C11  | 3.2889127                         | -0.0000016 | 1.3048727  |
| 14 C C12  | 4.0553286                         | -0.0000025 | -3.7484613 |
| 15 Cu Cu1 | 0.0328566                         | 0.0000005  | 0.0672101  |
| 16 O O2   | 0.2496030                         | 0.0000005  | 2.4226810  |
| 17 N N3   | -1.8561350                        | 0.0000003  | 0.8568840  |
| 18 C C13  | -3.0557005                        | -0.0000002 | 0.3123068  |
| 19 C C14  | -4.0363557                        | -0.0000016 | 1.3397205  |
| 20 C C15  | -3.3736375                        | -0.0000021 | 2.5337857  |
| 21 N N4   | -2.0152473                        | -0.0000007 | 2.2245249  |
| 22 C C17  | -0.8219232                        | 0.0000001  | 3.0030723  |
| 23 C C18  | -0.9279314                        | 0.0000006  | 4.4631844  |
| 24 C C19  | 0.1966284                         | 0.0000009  | 5.2104894  |
| 25 C C20  | 0.2248833                         | 0.0000017  | 6.6513734  |
| 26 C C21  | 1.3694417                         | 0.0000013  | 7.3563045  |
| 27 C C22  | 1.4705159                         | 0.0000017  | 8.8454943  |
| 28 C C23  | -3.2880232                        | 0.0000006  | -1.1576513 |
| 29 C C24  | -4.0025182                        | -0.0000042 | 3.8898601  |
| 30 O O3   | 0.0833236                         | 2.0047473  | 0.2472795  |
| 31 S S1   | -0.1906970                        | 3.0354538  | -0.8356129 |
| 32 O O5   | 0.8322668                         | 3.0631507  | -1.8821785 |
| 33 O O4   | -1.5943218                        | 3.0919556  | -1.2410422 |
| 34 C C26  | 0.0980176                         | 4.5866712  | 0.1771345  |
| 35 F F1   | 1.3441204                         | 4.6111150  | 0.6651795  |
| 36 F F3   | -0.7606260                        | 4.6482803  | 1.2026510  |
| 37 F F2   | -0.0797880                        | 5.6674941  | -0.5906062 |
| 38 O O6   | 0.0833236                         | -2.0047450 | 0.2472794  |
| 39 S S2   | -0.1906972                        | -3.0354519 | -0.8356125 |
| 40 O O7   | 0.8322672                         | -3.0631505 | -1.8821774 |
| 41 O O8   | -1.5943217                        | -3.0919528 | -1.2410428 |
| 42 C C6   | 0.0980150                         | -4.5866690 | 0.1771359  |
| 43 F F4   | -0.7606301                        | -4.6482770 | 1.2026513  |
| 44 F F5   | 1.3441171                         | -4.6111134 | 0.6651826  |
| 45 F F6   | -0.0797904                        | -5.6674923 | -0.5906044 |
| 46 H H46  | 5.1622623                         | -0.0000026 | -1.0551067 |
| 47 H H47  | 1.9254375                         | 0.0000097  | -4.8071167 |
| 48 H H48  | -1.1141238                        | -0.0000071 | -4.5090790 |
| 49 H H49  | 0.7199048                         | 0.0000090  | -7.0274109 |
| 50 H H50  | -2.3102925                        | -0.0000091 | -6.5968838 |
| 51 H H51  | -2.0777399                        | -0.8773681 | -8.9893195 |
| 52 H H52  | -0.5433100                        | 0.0000066  | -9.1507528 |
| 53 H H53  | -2.0777468                        | 0.8773678  | -8.9893147 |
| 54 H H54  | 4.3494603                         | -0.0000053 | 1.5584327  |
| 55 H H55  | 2.8158672                         | -0.8801267 | 1.7449324  |
| 56 H H56  | 2.8158732                         | 0.8801266  | 1.7449325  |
| 57 H H57  | 3.7864609                         | -0.8886126 | -4.3244912 |
| 58 H H58  | 3.7864673                         | 0.8886099  | -4.3244906 |
| 59 H H59  | 5.1380791                         | -0.0000063 | -3.6227124 |
| 60 H H60  | -5.1063454                        | -0.0000023 | 1.2079088  |
| 61 H H61  | -1.8917992                        | 0.0000012  | 4.9421568  |
| 62 H H62  | 1.1500484                         | 0.0000003  | 4.6897673  |
| 63 H H63  | -0.7280255                        | 0.0000025  | 7.1764641  |
| 64 H H64  | 2.3101397                         | 0.0000005  | 6.8080454  |
| 65 H H65  | 2.0265907                         | -0.8771491 | 9.1952066  |
| 66 H H66  | 2.0265898                         | 0.8771533  | 9.1952063  |
| 67 H H67  | 0.4890179                         | 0.0000011  | 9.3233712  |

| M0:          | 191             | 192             | 193             | 194             | 195             |
|--------------|-----------------|-----------------|-----------------|-----------------|-----------------|
| Eigenvalues: | -0.10370        | -0.09380        | -0.03530        | -0.02810        | 0.02002         |
| (ev)         | -2.82176        | -2.55235        | -0.96055        | -0.76466        | 0.54473         |
|              | A <sup>''</sup> | A <sup>''</sup> | A <sup>''</sup> | A <sup>''</sup> | A <sup>''</sup> |
| 1 N1 S1      | 0.00000         | -0.00000        | 0.00000         | 0.00000         | -0.00000        |
| 2 N1 S       | 0.00000         | -0.00000        | 0.00000         | 0.00000         | -0.00000        |
| 3 N1 PX      | 0.00000         | 0.00000         | 0.00000         | 0.00000         | -0.00000        |
| 4 N1 PY      | 0.00630         | 0.05207         | 0.02268         | 0.12778         | -0.00815        |
| 5 N1 PZ      | -0.00000        | -0.00000        | 0.00000         | 0.00000         | -0.00000        |
| 6 N1 S'      | -0.00000        | 0.00000         | -0.00000        | -0.00000        | 0.00000         |
| 7 N1 PX'     | 0.00000         | 0.00000         | 0.00000         | 0.00000         | -0.00000        |
| 8 N1 PY'     | 0.00814         | 0.07382         | 0.03146         | 0.18320         | -0.01334        |
| 9 N1 PZ'     | -0.00000        | -0.00000        | 0.00000         | 0.00000         | 0.00000         |
| 10 N1 S''    | 0.00000         | 0.00000         | -0.00000        | -0.00000        | 0.00000         |
| 11 N1 PX''   | 0.00000         | 0.00000         | 0.00000         | 0.00000         | -0.00000        |
| 12 N1 PY''   | 0.01817         | 0.11678         | 0.05652         | 0.29157         | -0.01291        |
| 13 N1 PZ''   | -0.00000        | -0.00000        | 0.00000         | 0.00000         | -0.00000        |
| 14 N1 DZ**2  | 0.00000         | -0.00000        | -0.00000        | -0.00000        | 0.00000         |
| 15 N1 DX-YY  | 0.00000         | 0.00000         | 0.00000         | -0.00000        | -0.00000        |
| 16 N1 DXY    | -0.00054        | -0.00229        | -0.00126        | -0.00298        | 0.00055         |
| 17 N1 DXZ    | -0.00000        | -0.00000        | 0.00000         | 0.00000         | 0.00000         |
| 18 N1 DYZ    | -0.00034        | -0.00661        | 0.00057         | 0.00160         | 0.00015         |
| 19 C2 S1     | -0.00000        | -0.00000        | -0.00000        | -0.00000        | -0.00000        |
| 20 C2 S      | -0.00000        | -0.00000        | -0.00000        | -0.00000        | -0.00000        |
| 21 C2 PX     | -0.00000        | -0.00000        | -0.00000        | -0.00000        | 0.00000         |
| 22 C2 PY     | -0.00822        | -0.06510        | -0.01986        | -0.09529        | 0.01054         |
| 23 C2 PZ     | -0.00000        | -0.00000        | -0.00000        | -0.00000        | 0.00000         |
| 24 C2 S'     | 0.00000         | -0.00000        | 0.00000         | 0.00000         | 0.00000         |
| 25 C2 PX'    | -0.00000        | -0.00000        | -0.00000        | -0.00000        | 0.00000         |
| 26 C2 PY'    | -0.01209        | -0.10255        | -0.03131        | -0.14859        | 0.01356         |
| 27 C2 PZ'    | -0.00000        | -0.00000        | -0.00000        | -0.00000        | 0.00000         |
| 28 C2 S''    | 0.00000         | 0.00000         | -0.00000        | 0.00000         | 0.00000         |
| 29 C2 PX''   | 0.00000         | 0.00000         | 0.00000         | 0.00000         | -0.00000        |
| 30 C2 PY''   | -0.01507        | -0.12570        | -0.04114        | -0.20837        | 0.02911         |
| 31 C2 PZ''   | -0.00000        | 0.00000         | -0.00000        | -0.00000        | 0.00000         |
| 32 C2 DZ**2  | 0.00000         | 0.00000         | 0.00000         | -0.00000        | -0.00000        |
| 33 C2 DX-YY  | -0.00000        | -0.00000        | -0.00000        | -0.00000        | 0.00000         |
| 34 C2 DXY    | -0.00101        | -0.01031        | -0.00404        | -0.02489        | 0.00090         |
| 35 C2 DXZ    | -0.00000        | 0.00000         | -0.00000        | -0.00000        | 0.00000         |
| 36 C2 DYZ    | -0.00017        | 0.00071         | -0.00042        | -0.00176        | 0.00174         |
| 37 C3 S1     | 0.00000         | 0.00000         | 0.00000         | 0.00000         | 0.00000         |
| 38 C3 S      | 0.00000         | 0.00000         | 0.00000         | 0.00000         | 0.00000         |
| 39 C3 PX     | 0.00000         | -0.00000        | -0.00000        | -0.00000        | -0.00000        |
| 40 C3 PY     | -0.00150        | -0.03834        | -0.00509        | -0.04609        | -0.00979        |
| 41 C3 PZ     | 0.00000         | -0.00000        | 0.00000         | 0.00000         | -0.00000        |
| 42 C3 S'     | -0.00000        | -0.00000        | -0.00000        | -0.00000        | -0.00000        |
| 43 C3 PX'    | 0.00000         | -0.00000        | -0.00000        | -0.00000        | 0.00000         |
| 44 C3 PY'    | -0.00252        | -0.05813        | -0.00694        | -0.06478        | -0.01301        |
| 45 C3 PZ'    | 0.00000         | -0.00000        | 0.00000         | 0.00000         | -0.00000        |
| 46 C3 S''    | -0.00000        | -0.00000        | 0.00000         | 0.00000         | -0.00000        |
| 47 C3 PX''   | 0.00000         | -0.00000        | -0.00000        | -0.00000        | 0.00000         |
| 48 C3 PY''   | -0.00254        | -0.08831        | -0.01947        | -0.15612        | -0.03590        |
| 49 C3 PZ''   | -0.00000        | -0.00000        | -0.00000        | -0.00000        | -0.00000        |
| 50 C3 DZ**2  | -0.00000        | 0.00000         | -0.00000        | 0.00000         | 0.00000         |
| 51 C3 DX-YY  | 0.00000         | 0.00000         | -0.00000        | -0.00000        | -0.00000        |
| 52 C3 DXY    | 0.00009         | 0.00033         | 0.00040         | 0.00053         | -0.00110        |
| 53 C3 DXZ    | -0.00000        | -0.00000        | -0.00000        | -0.00000        | -0.00000        |
| 54 C3 DYZ    | -0.00176        | -0.01463        | -0.00525        | -0.02812        | 0.00096         |
| 55 C4 S1     | 0.00000         | 0.00000         | -0.00000        | -0.00000        | -0.00000        |
| 56 C4 S      | 0.00000         | 0.00000         | -0.00000        | -0.00000        | -0.00000        |
| 57 C4 PX     | 0.00000         | 0.00000         | 0.00000         | 0.00000         | 0.00000         |
| 58 C4 PY     | 0.00779         | 0.07367         | 0.02386         | 0.13692         | 0.00400         |
| 59 C4 PZ     | -0.00000        | -0.00000        | -0.00000        | -0.00000        | 0.00000         |
| 60 C4 S'     | -0.00000        | -0.00000        | 0.00000         | 0.00000         | 0.00000         |















|         |    |          |          |          |          |          |          |    |          |          |          |          |          |
|---------|----|----------|----------|----------|----------|----------|----------|----|----------|----------|----------|----------|----------|
| 925 H59 | S  | 0.00000  | 0.00000  | 0.00000  | 0.00000  | 0.00000  | 970 H66  | PX | -0.00097 | 0.00008  | -0.00028 | 0.00007  | 0.00293  |
| 926 H59 | S' | 0.00000  | 0.00000  | -0.00000 | -0.00000 | -0.00000 | 971 H66  | PY | -0.00024 | 0.00002  | -0.00046 | 0.00009  | 0.00219  |
| 927 H59 | S" | 0.00000  | 0.00000  | -0.00000 | -0.00000 | 0.00000  | 972 H66  | PZ | 0.00234  | -0.00024 | -0.00373 | 0.00065  | 0.00758  |
| 928 H59 | PX | -0.00000 | 0.00000  | 0.00000  | 0.00000  | 0.00000  | 973 H67  | S  | -0.00000 | 0.00000  | 0.00000  | -0.00000 | -0.00000 |
| 929 H59 | PY | -0.00007 | -0.00002 | -0.00018 | -0.00082 | -0.00004 | 974 H67  | S' | -0.00000 | 0.00000  | 0.00000  | -0.00000 | -0.00000 |
| 930 H59 | PZ | 0.00000  | 0.00000  | -0.00000 | -0.00000 | 0.00000  | 975 H67  | S" | -0.00000 | 0.00000  | 0.00000  | -0.00000 | -0.00000 |
| 931 H60 | S  | -0.00000 | 0.00000  | -0.00000 | 0.00000  | 0.00000  | 976 H67  | PX | -0.00000 | 0.00000  | -0.00000 | 0.00000  | 0.00000  |
| 932 H60 | S' | 0.00000  | 0.00000  | -0.00000 | 0.00000  | 0.00000  | 977 H67  | PY | 0.00180  | -0.00016 | -0.00106 | 0.00017  | -0.00002 |
| 933 H60 | S" | 0.00000  | 0.00000  | 0.00000  | 0.00000  | -0.00000 | 978 H67  | PZ | -0.00000 | 0.00000  | 0.00000  | -0.00000 | -0.00000 |
| 934 H60 | PX | 0.00000  | 0.00000  | 0.00000  | 0.00000  | 0.00000  | 979 H68  | S  | 0.01479  | -0.00155 | 0.02157  | -0.00422 | 0.01138  |
| 935 H60 | PY | -0.00462 | 0.00031  | -0.00708 | 0.00177  | -0.00191 | 980 H68  | S' | 0.02593  | -0.00758 | 0.03522  | -0.01031 | 0.01470  |
| 936 H60 | PZ | -0.00000 | 0.00000  | -0.00000 | 0.00000  | -0.00000 | 981 H68  | S" | 0.01970  | -0.00292 | 0.02658  | -0.00606 | 0.02002  |
| 937 H61 | S  | 0.00000  | -0.00000 | 0.00000  | -0.00000 | -0.00000 | 982 H68  | PX | 0.00033  | -0.00031 | -0.00005 | -0.00025 | -0.00063 |
| 938 H61 | S' | 0.00000  | -0.00000 | 0.00000  | 0.00000  | -0.00000 | 983 H68  | PY | -0.00030 | 0.00031  | -0.00016 | 0.00025  | 0.00023  |
| 939 H61 | S" | -0.00000 | 0.00000  | 0.00000  | -0.00000 | -0.00000 | 984 H68  | PZ | -0.00151 | -0.00022 | -0.00397 | 0.00062  | -0.00277 |
| 940 H61 | PX | -0.00000 | 0.00000  | 0.00000  | 0.00000  | 0.00000  | 985 H69  | S  | -0.01479 | 0.00155  | -0.02157 | 0.00422  | -0.01138 |
| 941 H61 | PY | -0.00883 | 0.00097  | 0.01005  | -0.00150 | -0.00055 | 986 H69  | S' | -0.02593 | 0.00758  | -0.03522 | 0.01031  | -0.01470 |
| 942 H61 | PZ | 0.00000  | -0.00000 | -0.00000 | 0.00000  | -0.00000 | 987 H69  | S" | -0.01970 | 0.00292  | -0.02658 | 0.00606  | -0.02002 |
| 943 H62 | S  | -0.00000 | 0.00000  | 0.00000  | -0.00000 | 0.00000  | 988 H69  | PX | -0.00033 | 0.00031  | 0.00005  | 0.00025  | 0.00063  |
| 944 H62 | S' | -0.00000 | 0.00000  | 0.00000  | 0.00000  | 0.00000  | 989 H69  | PY | -0.00030 | 0.00031  | -0.00016 | 0.00025  | 0.00023  |
| 945 H62 | S" | -0.00000 | 0.00000  | 0.00000  | 0.00000  | 0.00000  | 990 H69  | PZ | 0.00151  | 0.00022  | 0.00397  | -0.00062 | 0.00277  |
| 946 H62 | PX | 0.00000  | -0.00000 | 0.00000  | 0.00000  | 0.00000  | 991 H70  | S  | 0.00000  | 0.00000  | 0.00000  | -0.00000 | -0.00000 |
| 947 H62 | PY | 0.01300  | -0.00102 | -0.00317 | 0.00055  | -0.01426 | 992 H70  | S' | 0.00000  | -0.00000 | 0.00000  | 0.00000  | -0.00000 |
| 948 H62 | PZ | -0.00000 | 0.00000  | 0.00000  | 0.00000  | -0.00000 | 993 H70  | S" | 0.00000  | 0.00000  | 0.00000  | 0.00000  | 0.00000  |
| 949 H63 | S  | -0.00000 | 0.00000  | 0.00000  | -0.00000 | -0.00000 | 994 H70  | PX | -0.00000 | 0.00000  | -0.00000 | 0.00000  | 0.00000  |
| 950 H63 | S' | -0.00000 | 0.00000  | 0.00000  | 0.00000  | -0.00000 | 995 H70  | PY | 0.00138  | 0.00195  | 0.00189  | 0.00037  | 0.00079  |
| 951 H63 | S" | 0.00000  | -0.00000 | -0.00000 | 0.00000  | -0.00001 | 996 H70  | PZ | 0.00000  | 0.00000  | 0.00000  | 0.00000  | 0.00000  |
| 952 H63 | PX | 0.00000  | -0.00000 | -0.00000 | 0.00000  | 0.00000  | 997 H71  | S  | 0.01095  | -0.00031 | 0.03284  | -0.00682 | 0.02024  |
| 953 H63 | PY | 0.00334  | -0.00039 | -0.00918 | 0.00166  | 0.02073  | 998 H71  | S' | 0.02197  | -0.00059 | 0.07122  | -0.01486 | 0.06725  |
| 954 H63 | PZ | -0.00000 | -0.00000 | 0.00000  | -0.00000 | -0.00000 | 999 H71  | S" | 0.09221  | -0.00701 | 0.12787  | -0.03371 | 0.11129  |
| 955 H64 | S  | 0.00000  | -0.00000 | -0.00000 | 0.00000  | 0.00000  | 1000 H71 | PX | 0.00173  | -0.00019 | -0.00250 | 0.00041  | -0.00199 |
| 956 H64 | S' | 0.00000  | -0.00000 | 0.00000  | -0.00000 | -0.00000 | 1001 H71 | PY | -0.00061 | 0.00005  | -0.00062 | 0.00020  | 0.00041  |
| 957 H64 | S" | -0.00000 | -0.00000 | 0.00000  | 0.00000  | 0.00000  | 1002 H71 | PZ | 0.00125  | -0.00007 | 0.00350  | -0.00082 | 0.00212  |
| 958 H64 | PX | -0.00000 | 0.00000  | 0.00000  | -0.00000 | 0.00000  | 1003 H72 | S  | -0.01095 | 0.00031  | -0.03284 | 0.00682  | -0.02024 |
| 959 H64 | PY | -0.01174 | 0.00109  | 0.01115  | -0.00185 | -0.01526 | 1004 H72 | S' | -0.02197 | 0.00059  | -0.07122 | 0.01486  | -0.06725 |
| 960 H64 | PZ | 0.00000  | -0.00000 | -0.00000 | -0.00000 | -0.00000 | 1005 H72 | S" | -0.09221 | 0.00701  | -0.12787 | 0.03371  | -0.11130 |
| 961 H65 | S  | -0.03053 | 0.00276  | 0.02437  | -0.00397 | -0.02759 | 1006 H72 | PX | -0.00173 | 0.00019  | 0.00250  | -0.00041 | 0.00199  |
| 962 H65 | S' | -0.06552 | 0.00590  | 0.04716  | -0.00757 | -0.02190 | 1007 H72 | PY | -0.00061 | 0.00005  | -0.00062 | 0.00020  | 0.00041  |
| 963 H65 | S" | -0.07877 | 0.00742  | 0.08579  | -0.01461 | -0.11254 | 1008 H72 | PZ | -0.00125 | 0.00007  | -0.00350 | 0.00082  | -0.00212 |
| 964 H65 | PX | 0.00097  | -0.00008 | 0.00028  | -0.00007 | -0.00293 | 1009 H73 | S  | 0.00000  | -0.00000 | 0.00000  | -0.00000 | -0.00000 |
| 965 H65 | PY | -0.00024 | 0.00002  | -0.00046 | 0.00009  | 0.00219  | 1010 H73 | S' | 0.00000  | -0.00000 | 0.00000  | -0.00000 | -0.00000 |
| 966 H65 | PZ | -0.00234 | 0.00024  | 0.00373  | -0.00065 | -0.00758 | 1011 H73 | S" | 0.00000  | -0.00000 | 0.00000  | -0.00000 | -0.00000 |
| 967 H66 | S  | 0.03053  | -0.00276 | -0.02437 | 0.00397  | 0.02759  | 1012 H73 | PX | 0.00000  | -0.00000 | -0.00000 | 0.00000  | 0.00000  |
| 968 H66 | S' | 0.06552  | -0.00590 | -0.04716 | 0.00757  | 0.02190  | 1013 H73 | PY | 0.00006  | -0.00002 | -0.00086 | 0.00016  | -0.00036 |
| 969 H66 | S" | 0.07877  | -0.00742 | -0.08579 | 0.01461  | 0.11254  | 1014 H73 | PZ | -0.00000 | -0.00000 | 0.00000  | -0.00000 | 0.00000  |

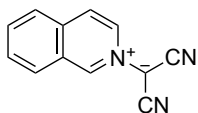

SPARTAN '18 Quantum Mechanics Program: (x86/Darwin) build 1.3.0

Job type: Geometry optimization.

Method: RB3LYP

Basis set: 6-31G(D)

Number of basis functions: 239

Number of electrons: 100

Parallel Job: 8 threads

SCF model:

A restricted hybrid HF-DFT SCF calculation will be performed using Pulay DIIS + Geometric Direct Minimization

|    |             |          |                                 |
|----|-------------|----------|---------------------------------|
| 6  | -625.661601 | 0.004894 | 0.043262                        |
| 7  | -625.661818 | 0.002419 | 0.028972                        |
| 8  | -625.661884 | 0.000785 | 0.008293                        |
| 8  | -625.661884 | 0.001282 | 0.037009 Switching to cartesian |
| 9  | -625.661890 | 0.000892 | 0.008318                        |
| 10 | -625.661872 | 0.004320 | 0.022853                        |
| 11 | -625.661890 | 0.000707 | 0.012895                        |
| 12 | -625.661890 | 0.000980 | 0.005151                        |
| 13 | -625.661892 | 0.000042 | 0.000806                        |

Reason for exit: Successful completion

Quantum Calculation CPU Time : 25:10.27

Quantum Calculation Wall Time: 3:25.25

Optimization:

| Step | Energy      | Max Grad. | Max Dist. |
|------|-------------|-----------|-----------|
| 1    | -625.632394 | 0.043248  | 0.121413  |
| 2    | -625.651939 | 0.019627  | 0.116814  |
| 3    | -625.658187 | 0.010374  | 0.065019  |
| 4    | -625.660078 | 0.005667  | 0.063700  |
| 5    | -625.660987 | 0.004918  | 0.076735  |

SPARTAN '18 Properties Program: (x86/Darwin) build 1.3.0

Use of molecular symmetry enabled

Cartesian Coordinates (Angstroms)

| Atom | X | Y | Z |
|------|---|---|---|
|------|---|---|---|

|          |            |            |            |          |            |            |            |
|----------|------------|------------|------------|----------|------------|------------|------------|
| 1 C C1   | 1.2012142  | 0.0000003  | 2.4380257  | 11 C C8  | -0.3844595 | 0.0000003  | -3.0173063 |
| 2 C C4   | -1.5350777 | -0.0000004 | 1.7371603  | 12 C C11 | -0.5001265 | 1.2542076  | -3.6228956 |
| 3 C C2   | 0.2208799  | 0.0000002  | 3.4067560  | 13 C C12 | -0.5001275 | -1.2542073 | -3.6228959 |
| 4 C C6   | 0.8437978  | 0.0000001  | 1.0674731  | 14 N N2  | -0.5940119 | 2.3252791  | -4.0919675 |
| 5 C C5   | -0.5448025 | -0.0000003 | 0.7184055  | 15 N N3  | -0.5940142 | -2.3252792 | -4.0919681 |
| 6 C C3   | -1.1539057 | -0.0000002 | 3.0582995  | 16 H H16 | 2.2519742  | 0.0000005  | 2.7132212  |
| 7 C C7   | -0.8905418 | -0.0000003 | -0.6460101 | 17 H H17 | -2.5846115 | -0.0000006 | 1.4572489  |
| 8 N N1   | 0.0320006  | -0.0000001 | -1.6087550 | 18 H H18 | 0.5019742  | 0.0000005  | 4.4559406  |
| 9 C C9   | 1.3728929  | 0.0000000  | -1.2917911 | 19 H H19 | -1.9046336 | -0.0000002 | 3.8423962  |
| 10 C C10 | 1.7908106  | 0.0000001  | 0.0095683  | 20 H H20 | -1.9178437 | -0.0000004 | -0.9911467 |
|          |            |            |            | 21 H H21 | 2.0347173  | 0.0000001  | -2.1470733 |
|          |            |            |            | 22 H H22 | 2.8538947  | 0.0000003  | 0.2273142  |

## 12. References

The references are numbered according to the numbering in the manuscript file.

- 2 (e) Z. Li, N. Xu, N. Guo, Y. Zhou, L. Lin and X. Feng, *Chem. Eur. J.*, 2021, **27**, 14841–14845.
- 7 (a) K. Ishihara and M. Fushimi, *Org. Lett.*, 2006, **8**, 1921–1924; (f) M. Hori, A. Sakakura and K. Ishihara, *J. Am. Chem. Soc.*, 2014, **136**, 13198–13201; (l) W. Guo, M. Hori, Y. Oguo, K. Nishimura, K. Oki, T. Ikai, E. Yashima and K. Ishihara, *J. Am. Chem. Soc.*, 2023, **145**, 27080–27088.
- 8 (e) N. Fernandez, L. Carrillo, J. L. Vicario, D. Badia and E. Reyes, *Chem. Commun.*, 2011, **47**, 12313–12315.
- 12 (a) Q. Yao, Z. Wang, Y. H. Zhang, X. H. Liu, L. L. Lin and X. Feng, *J. Org. Chem.*, 2015, **80**, 5704–5712; (b) Y. Zheng, Y. Yao, L. Ye, Z. Shi, X. Li and Z. Zhao, *Tetrahedron*, 2016, **72**, 973–978.

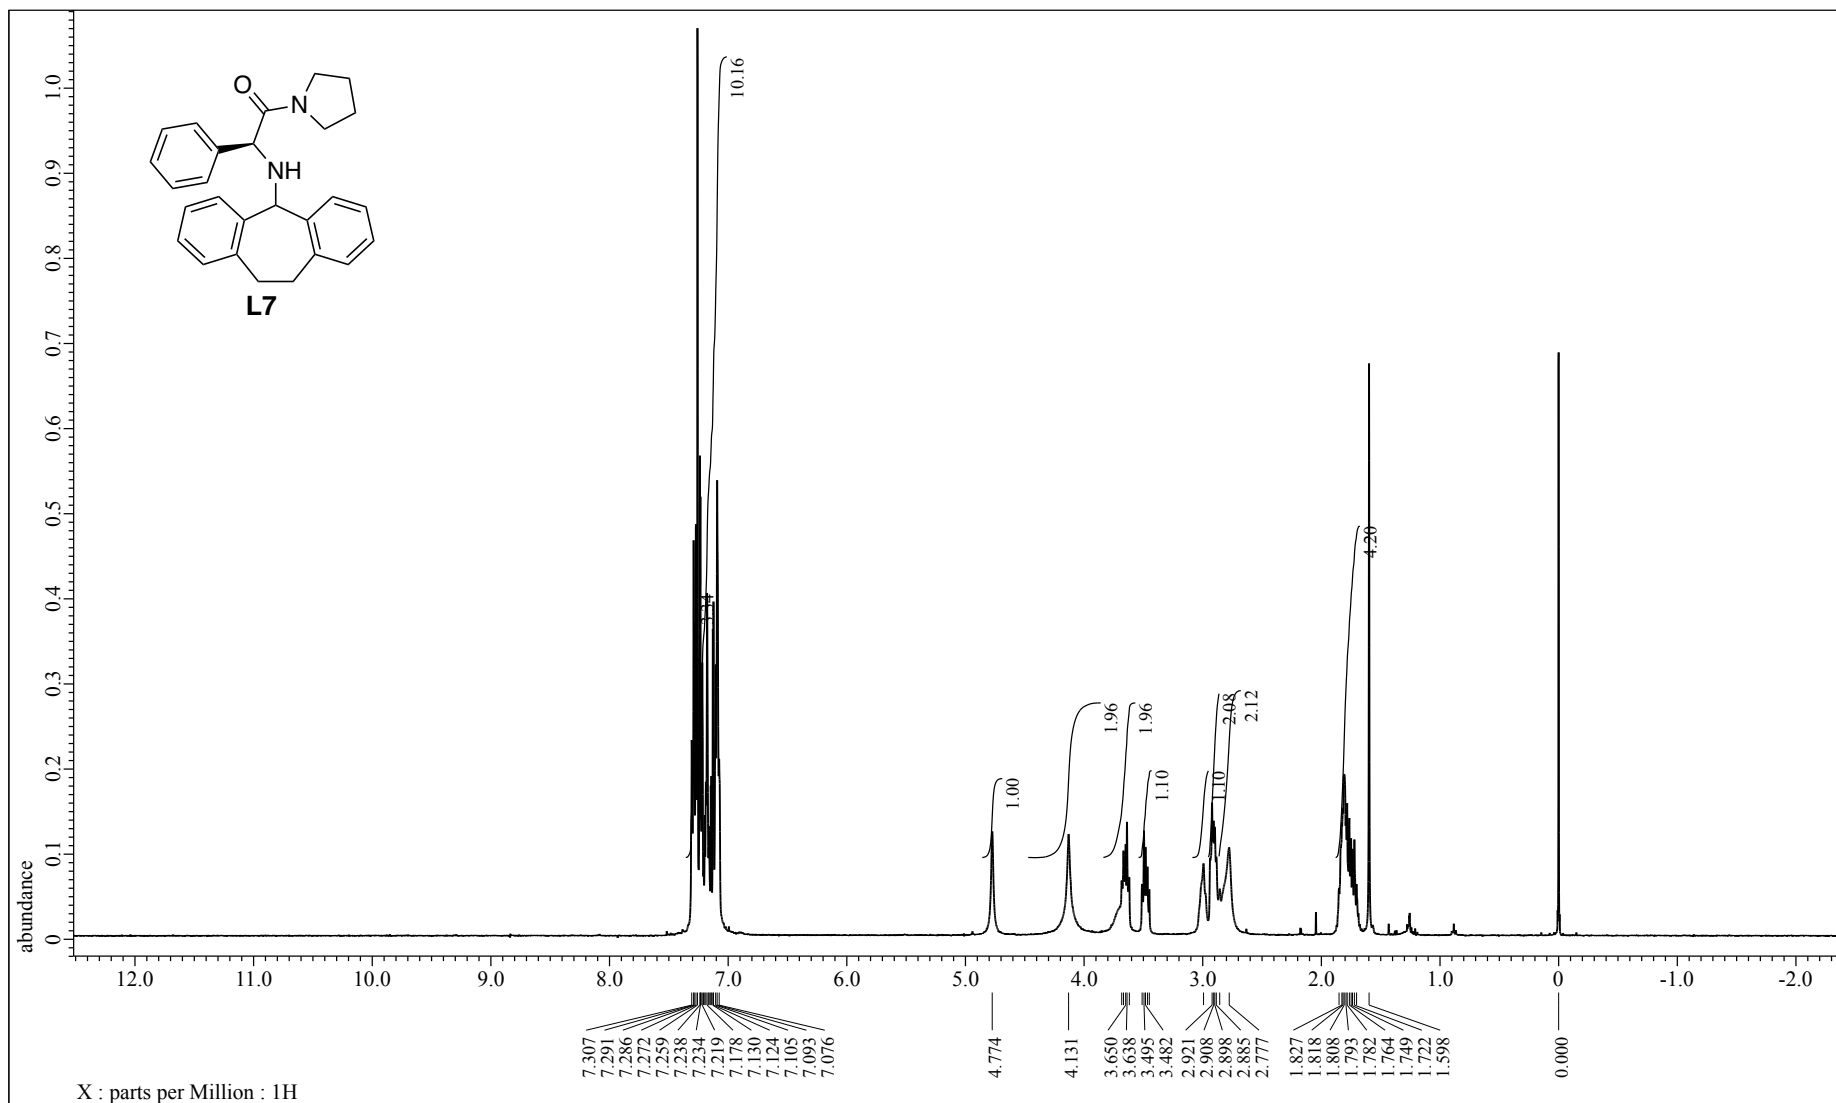

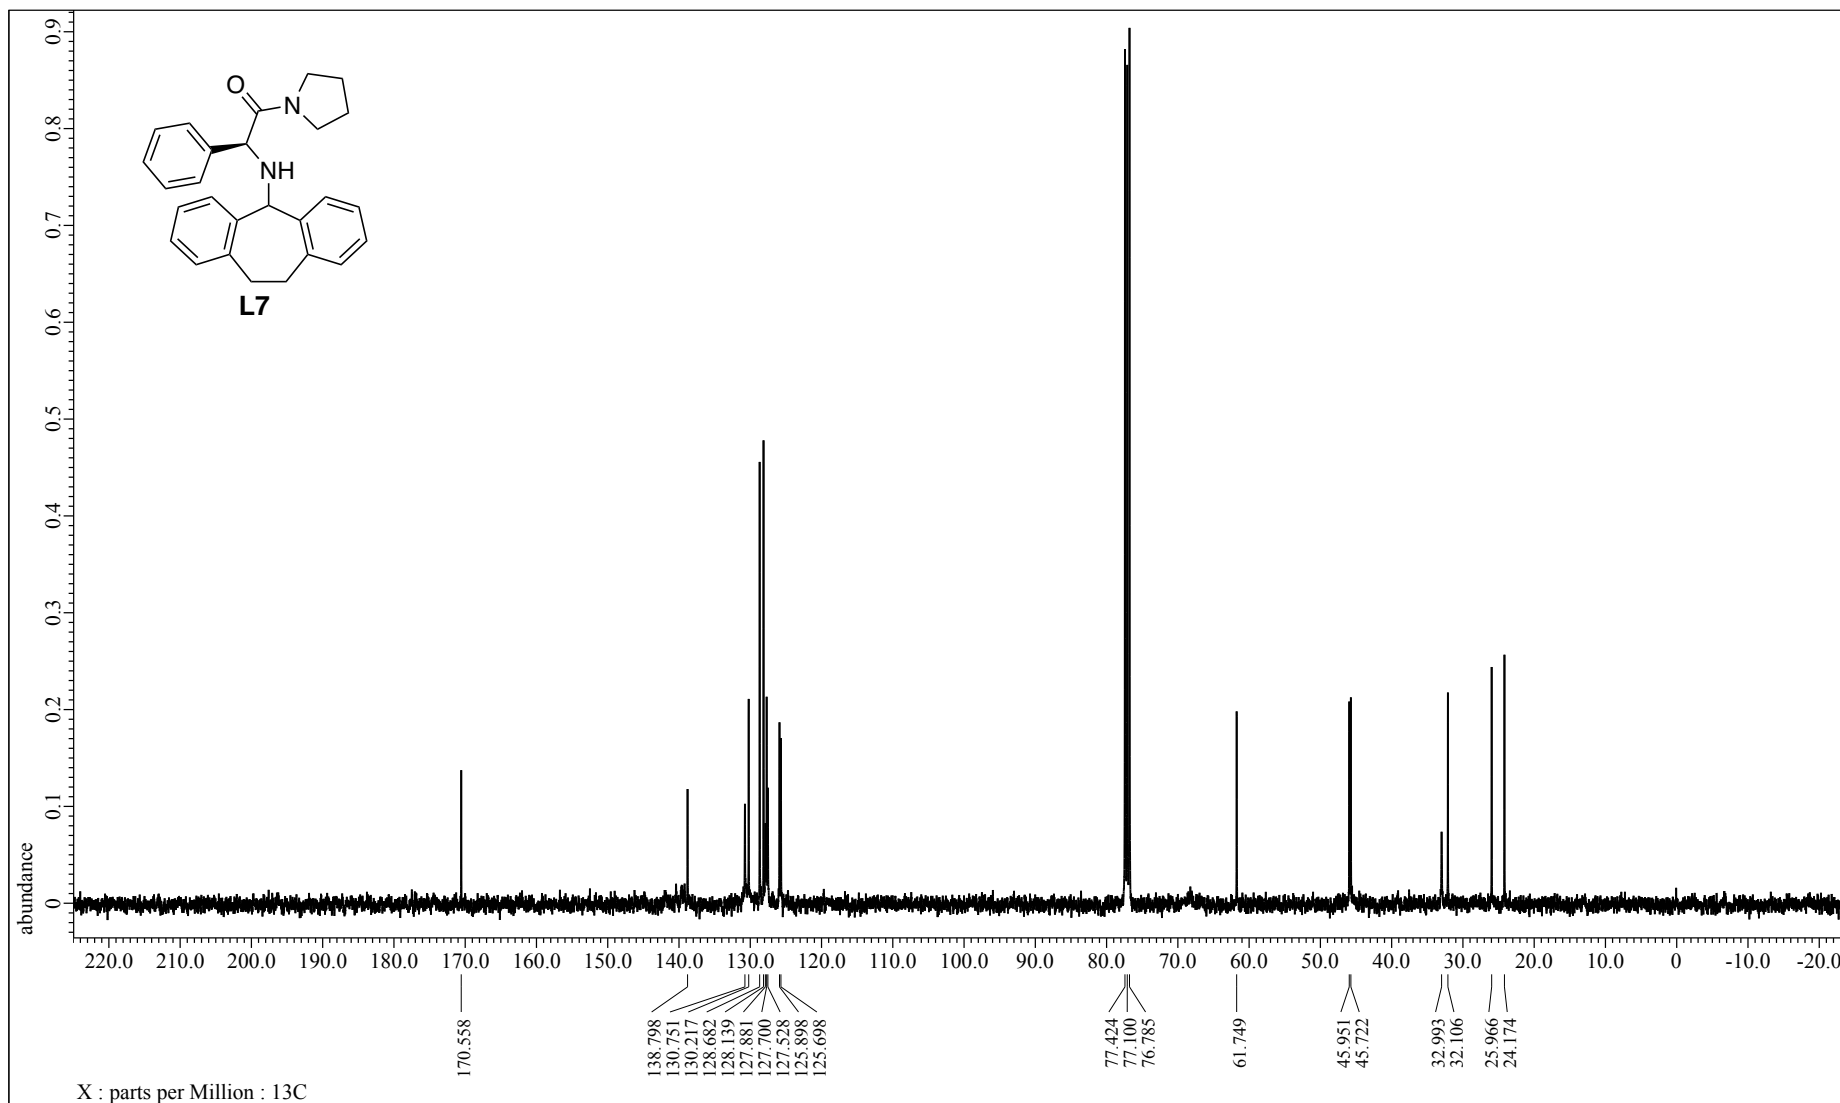

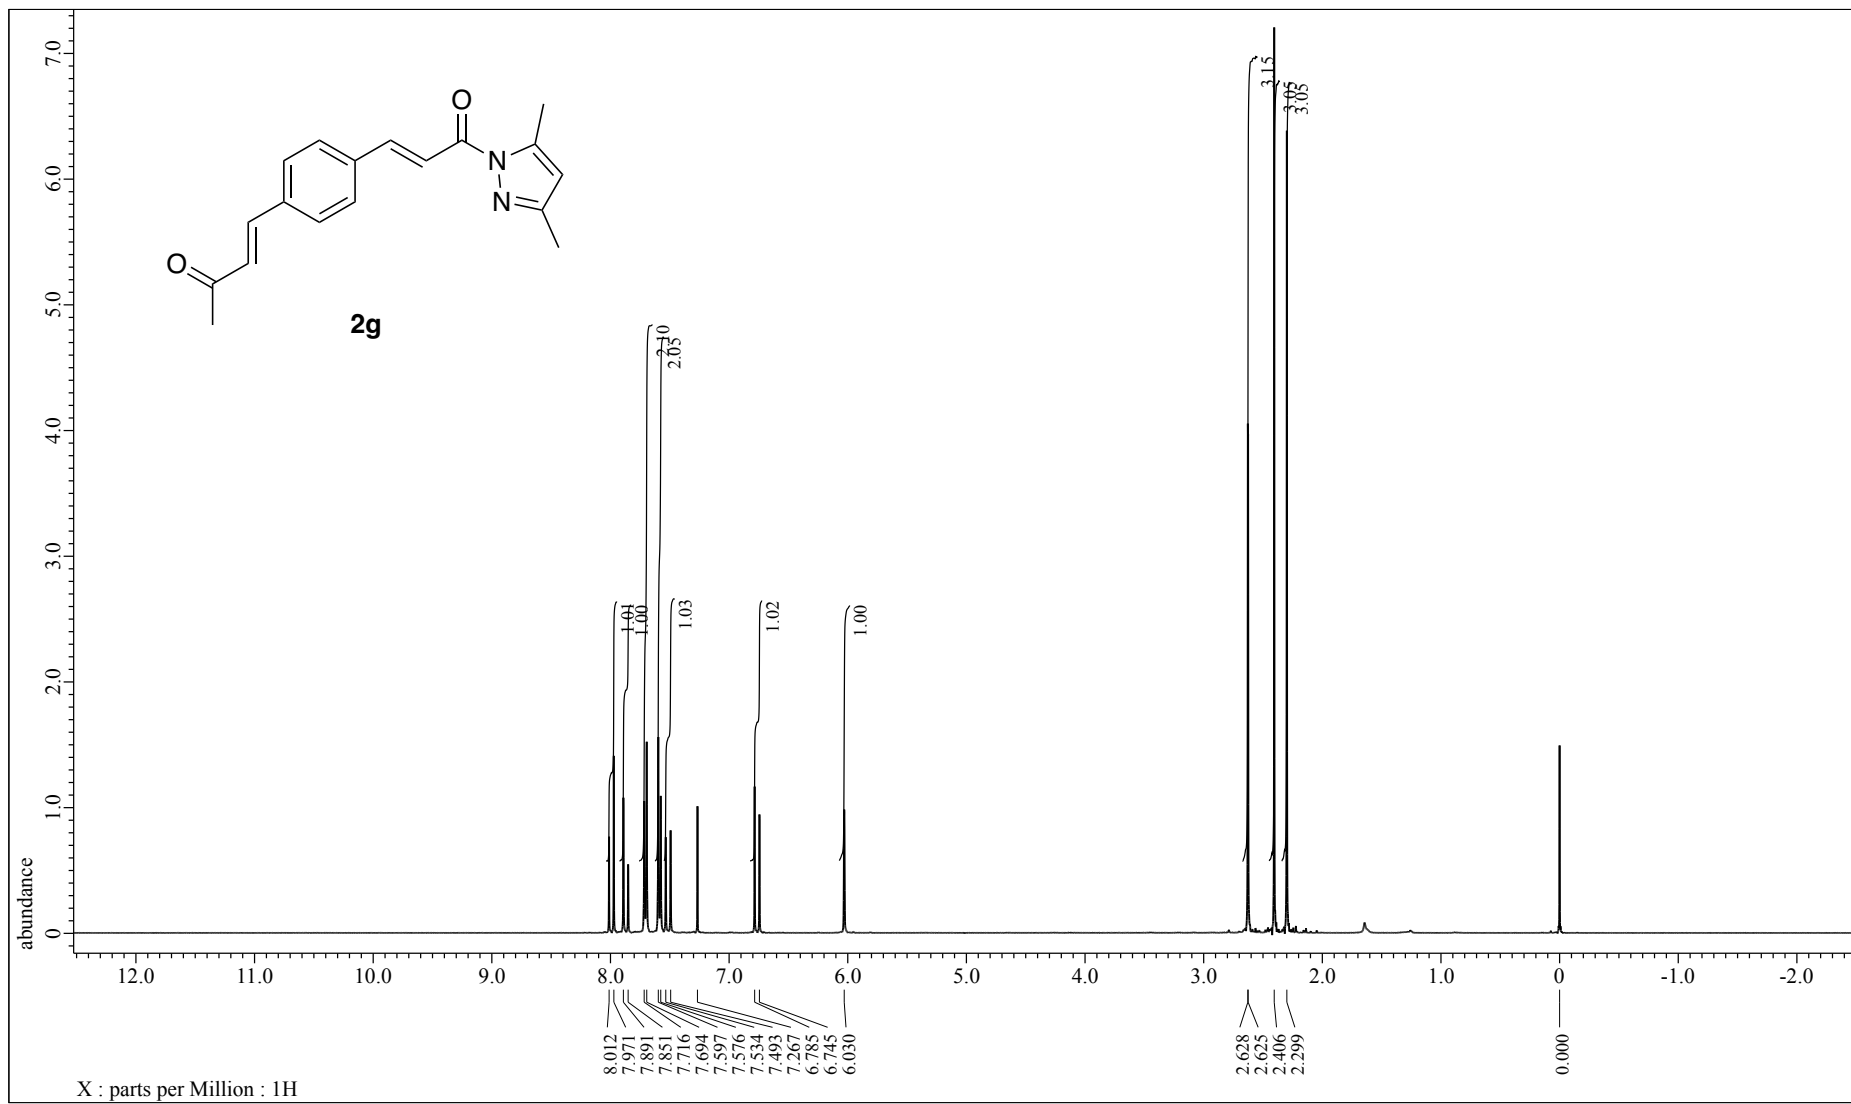

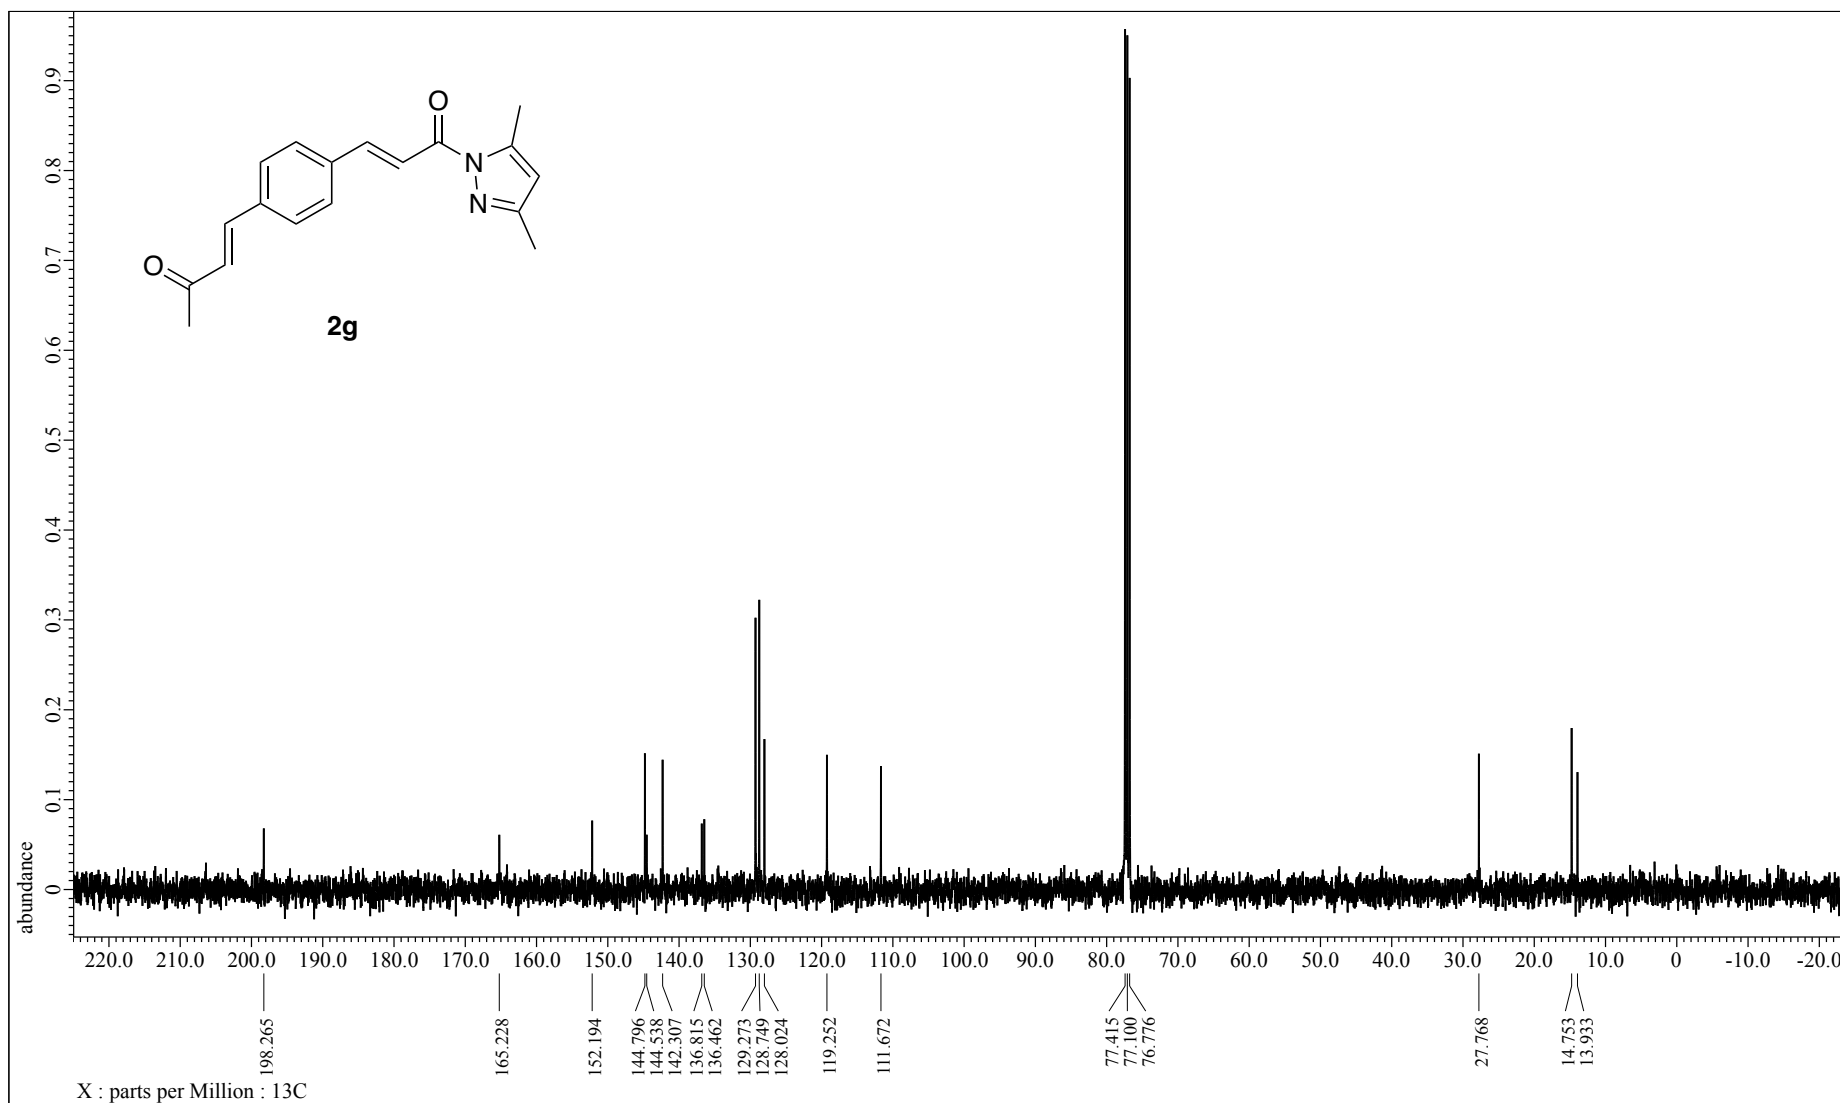



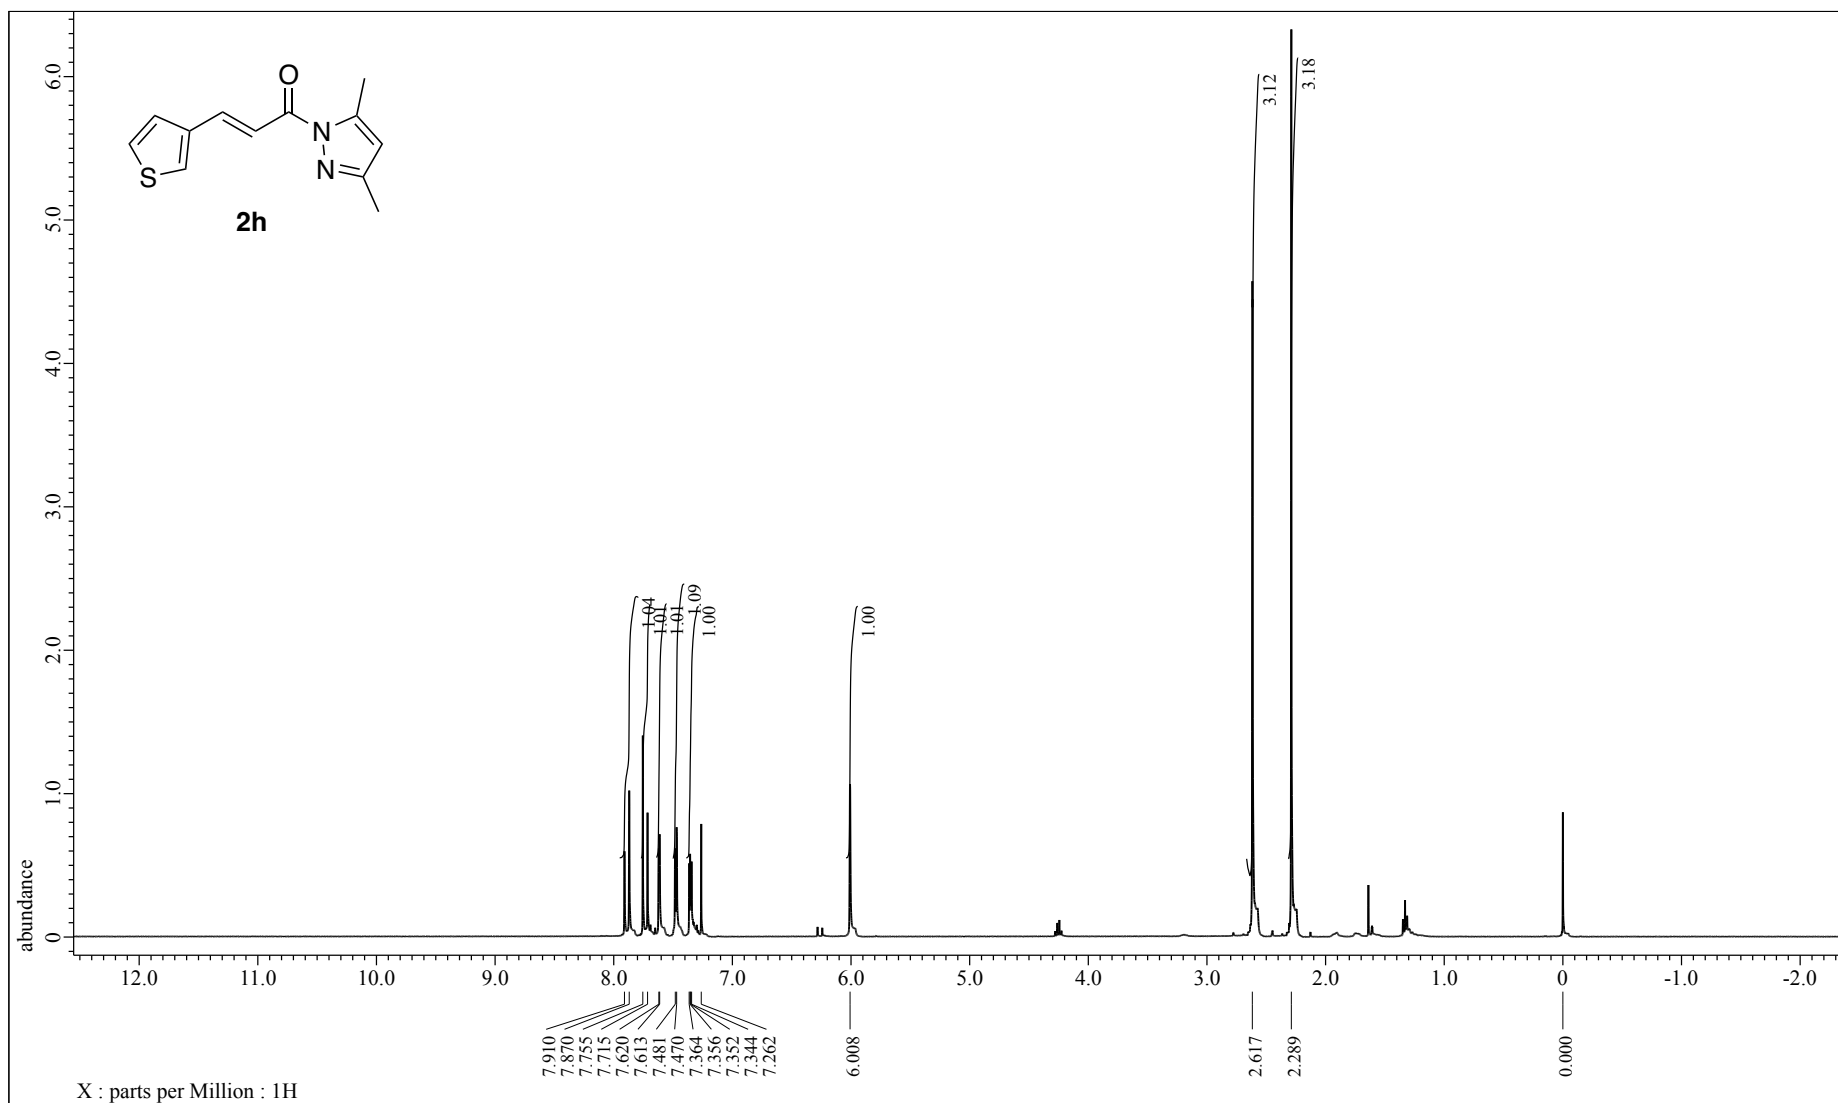

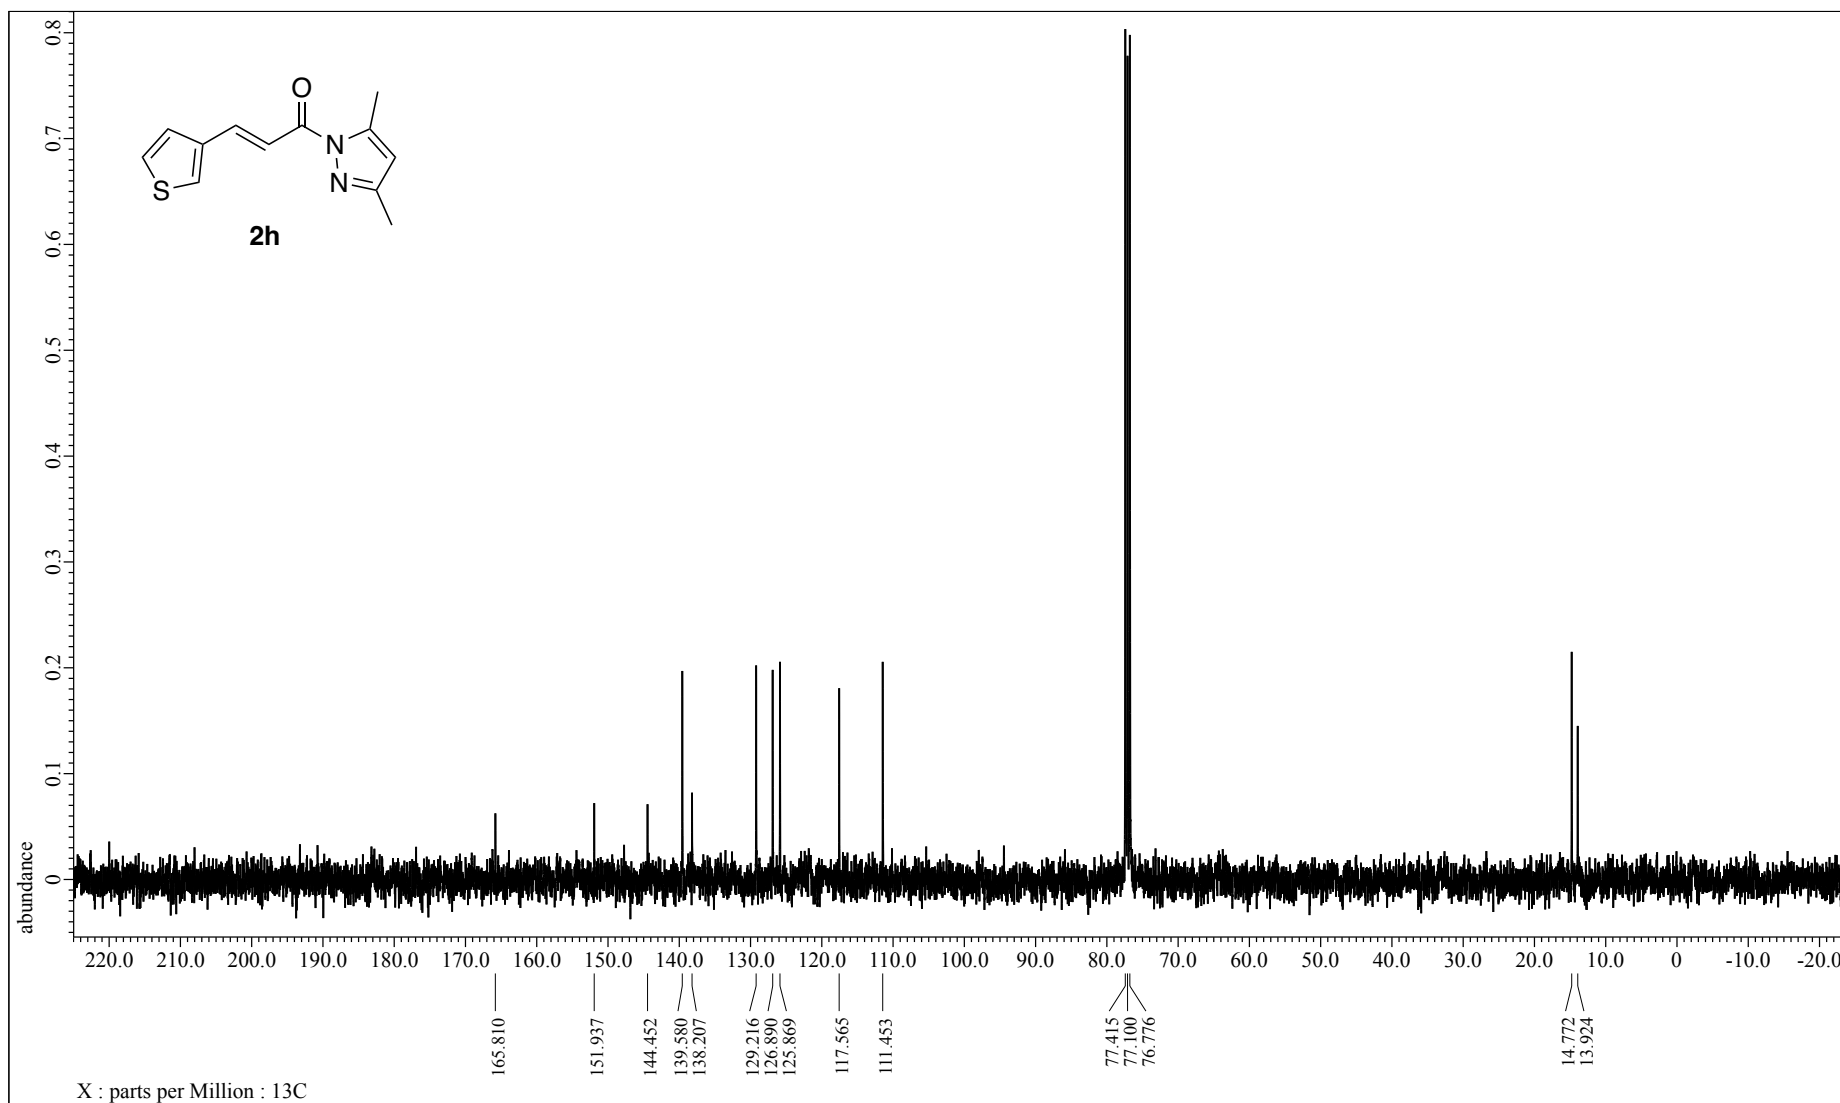

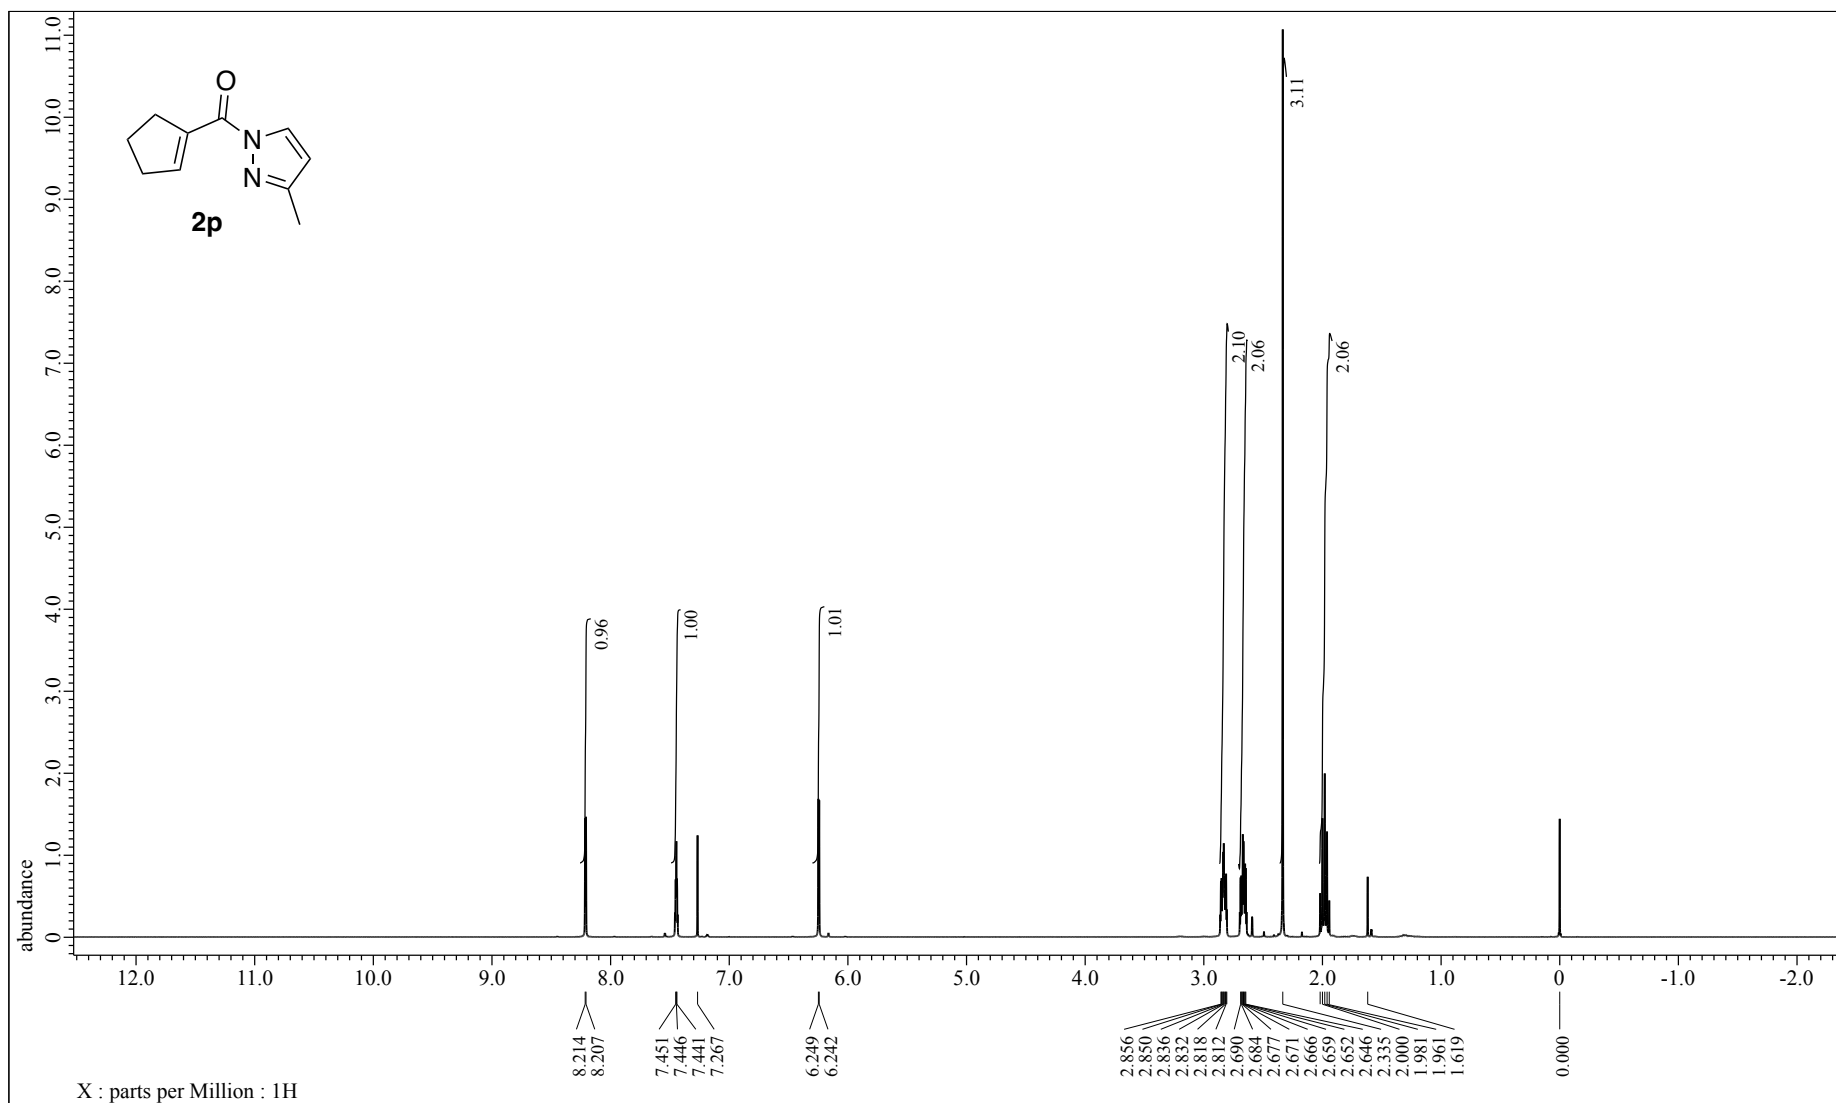

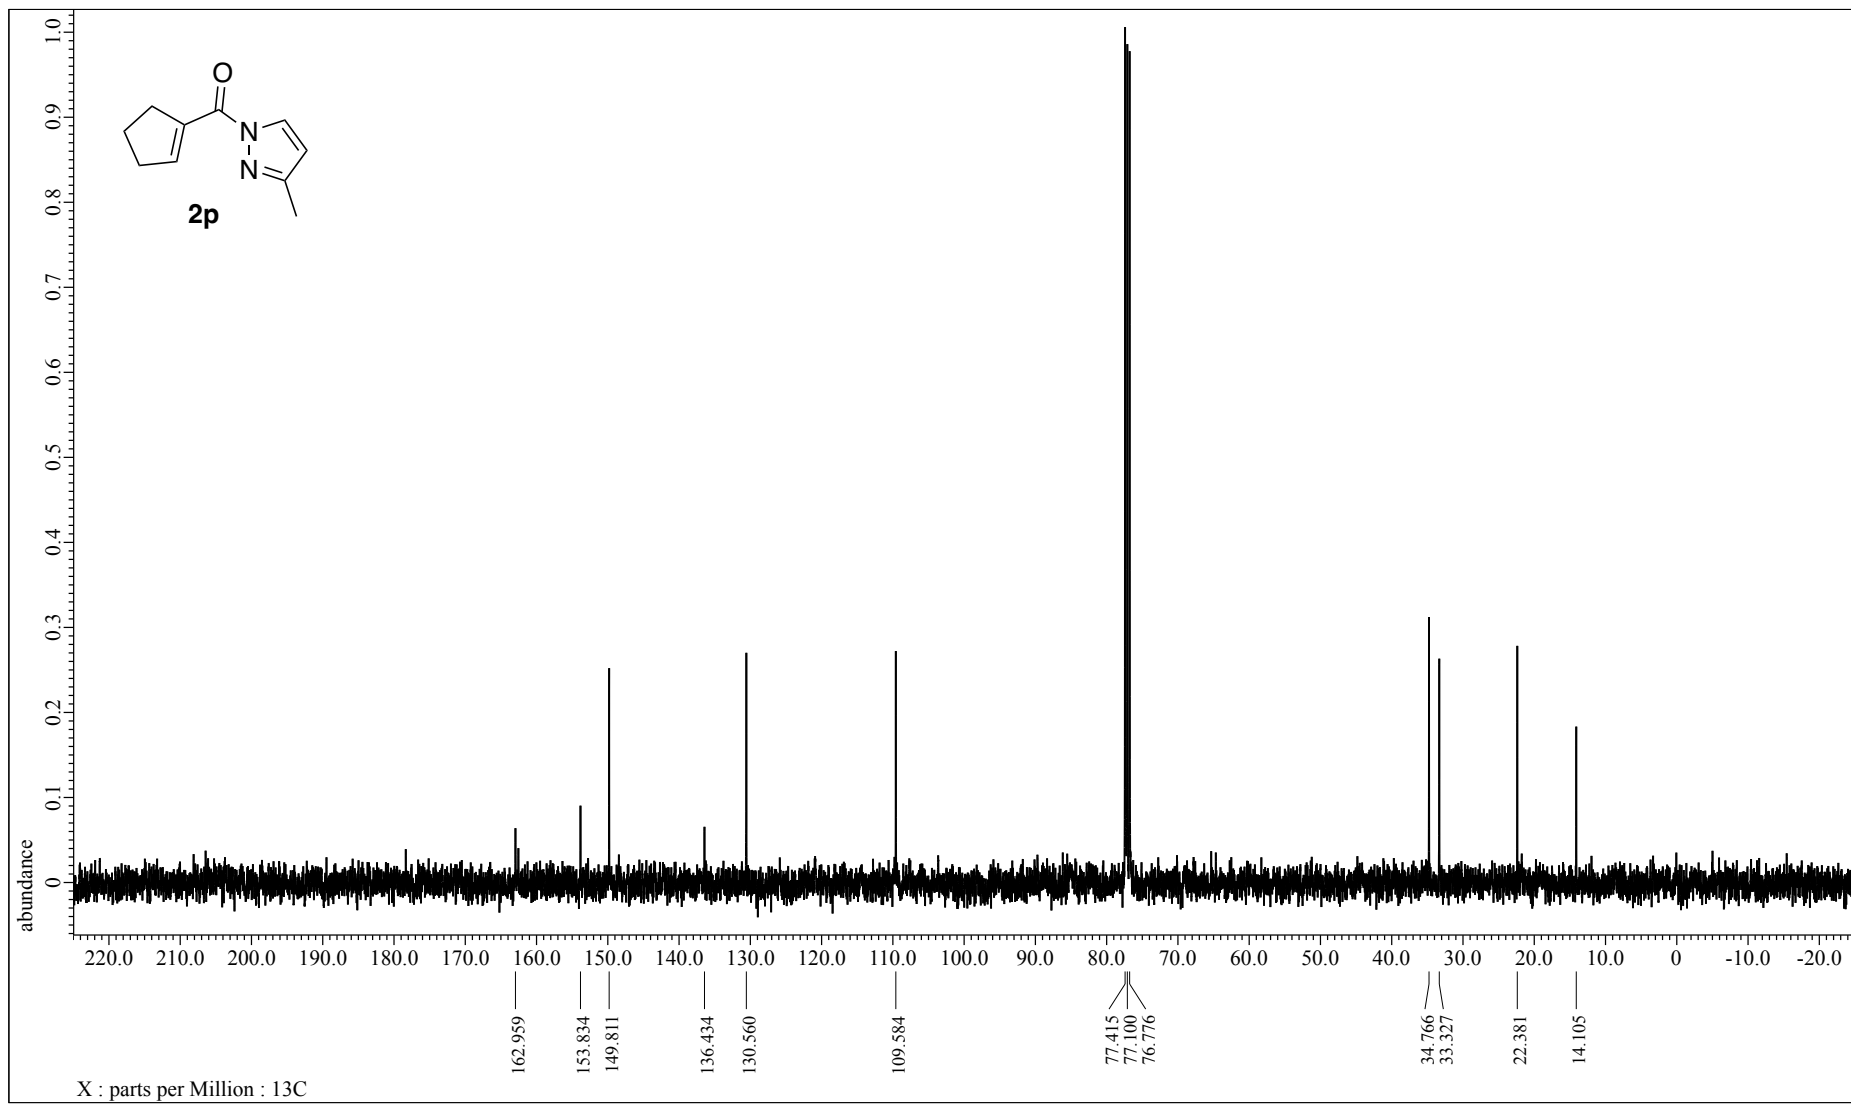

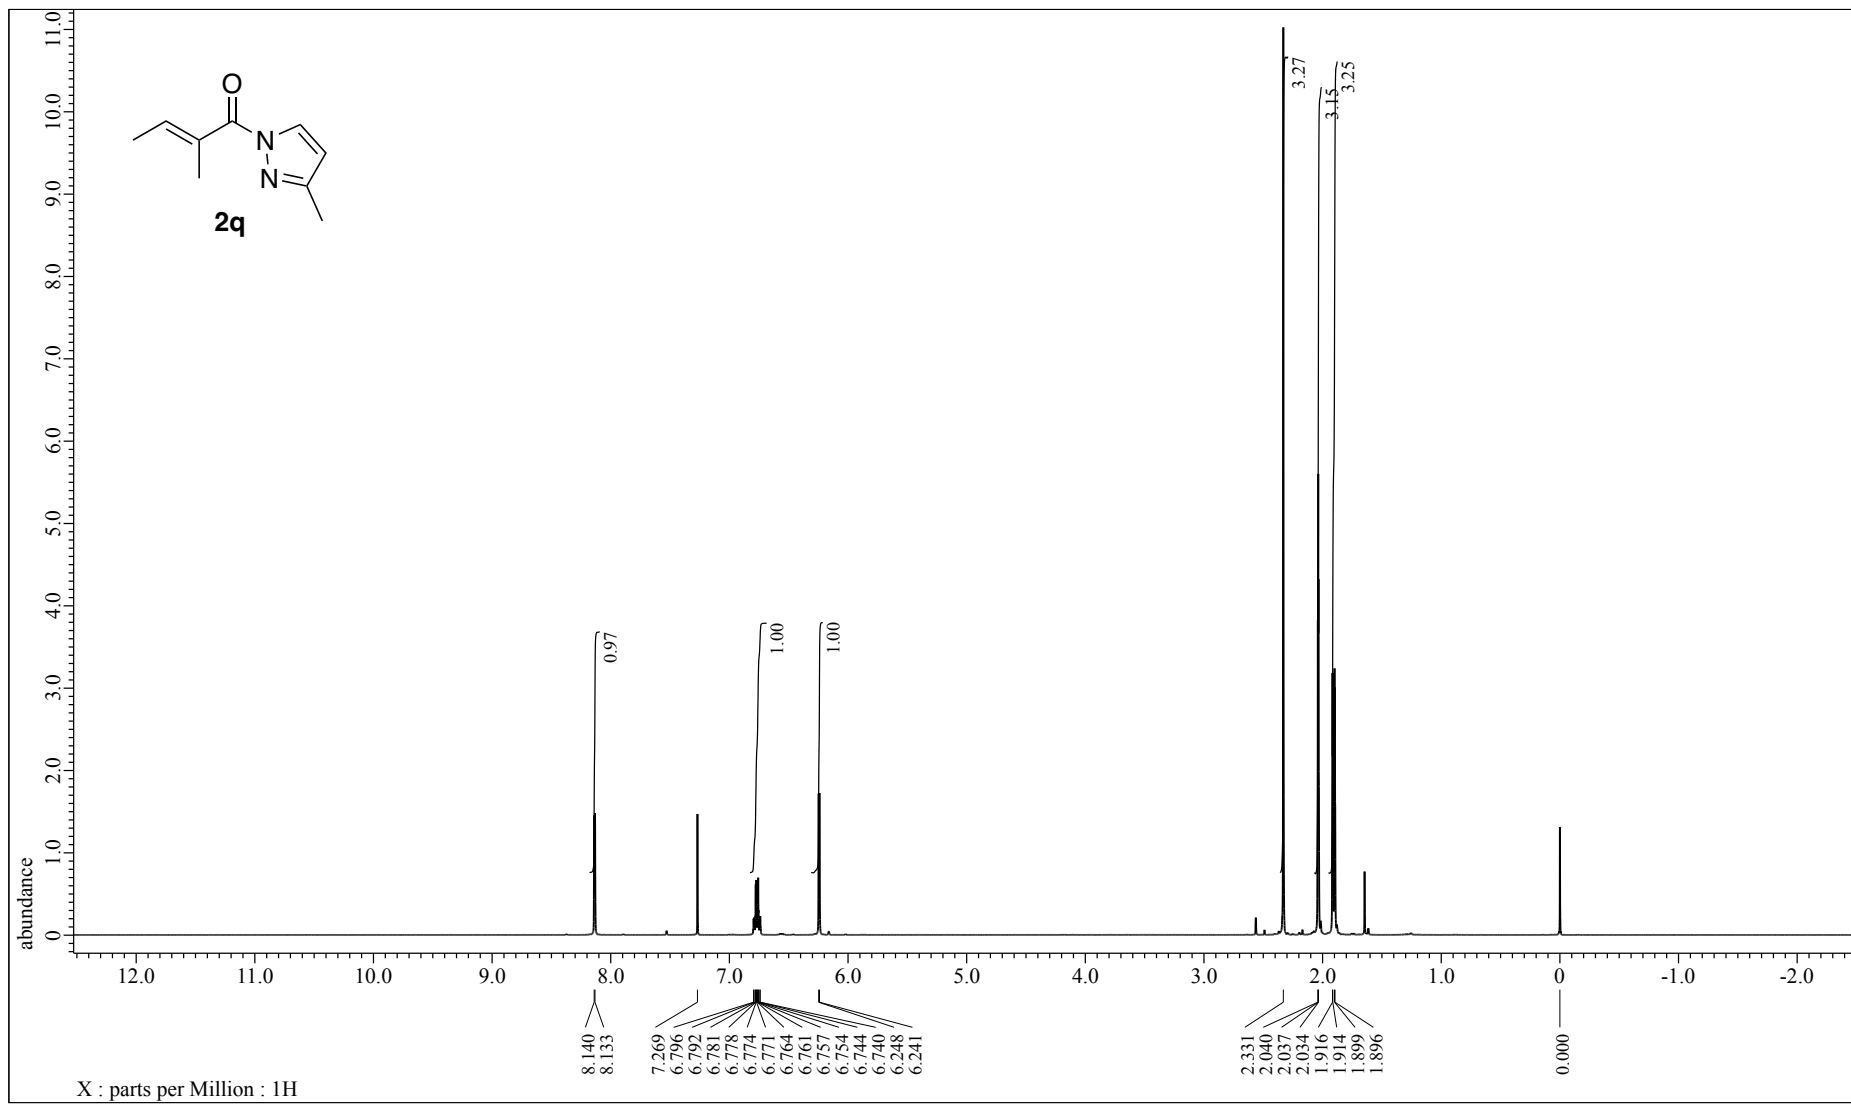

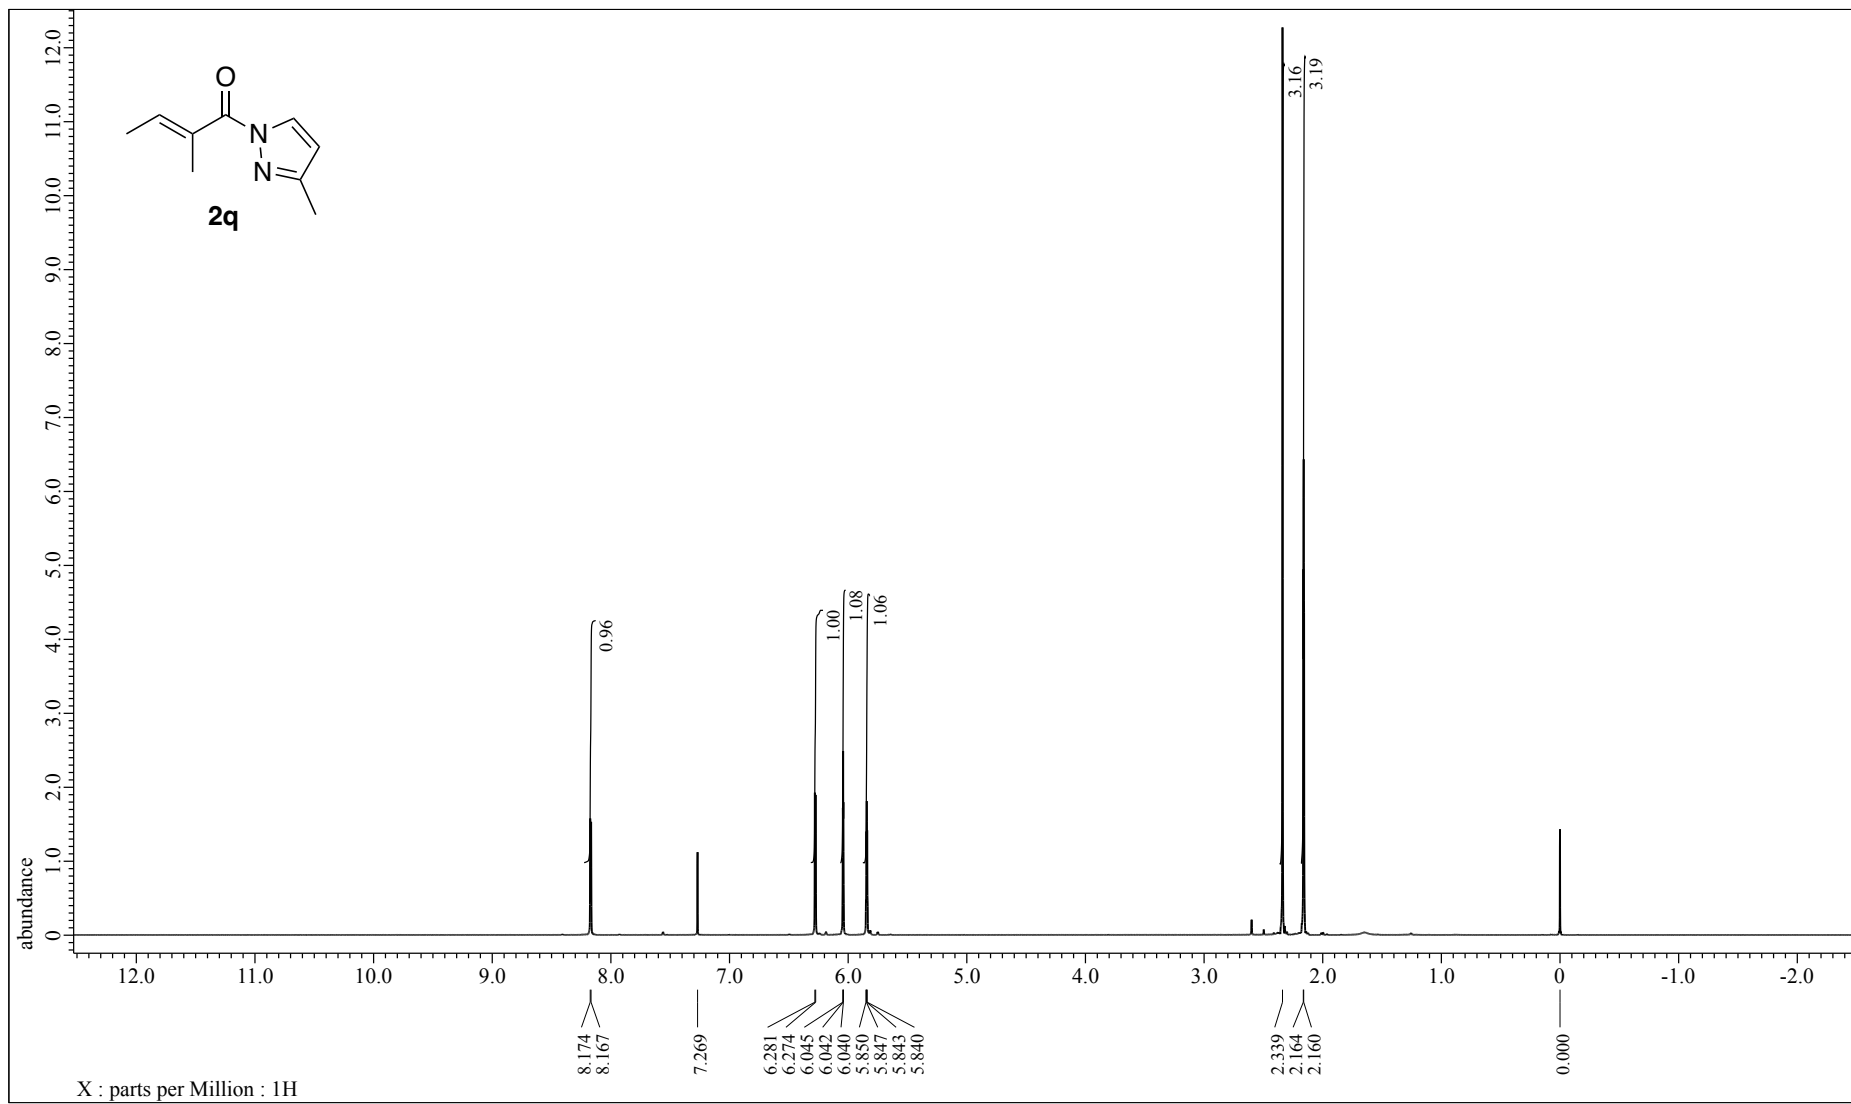

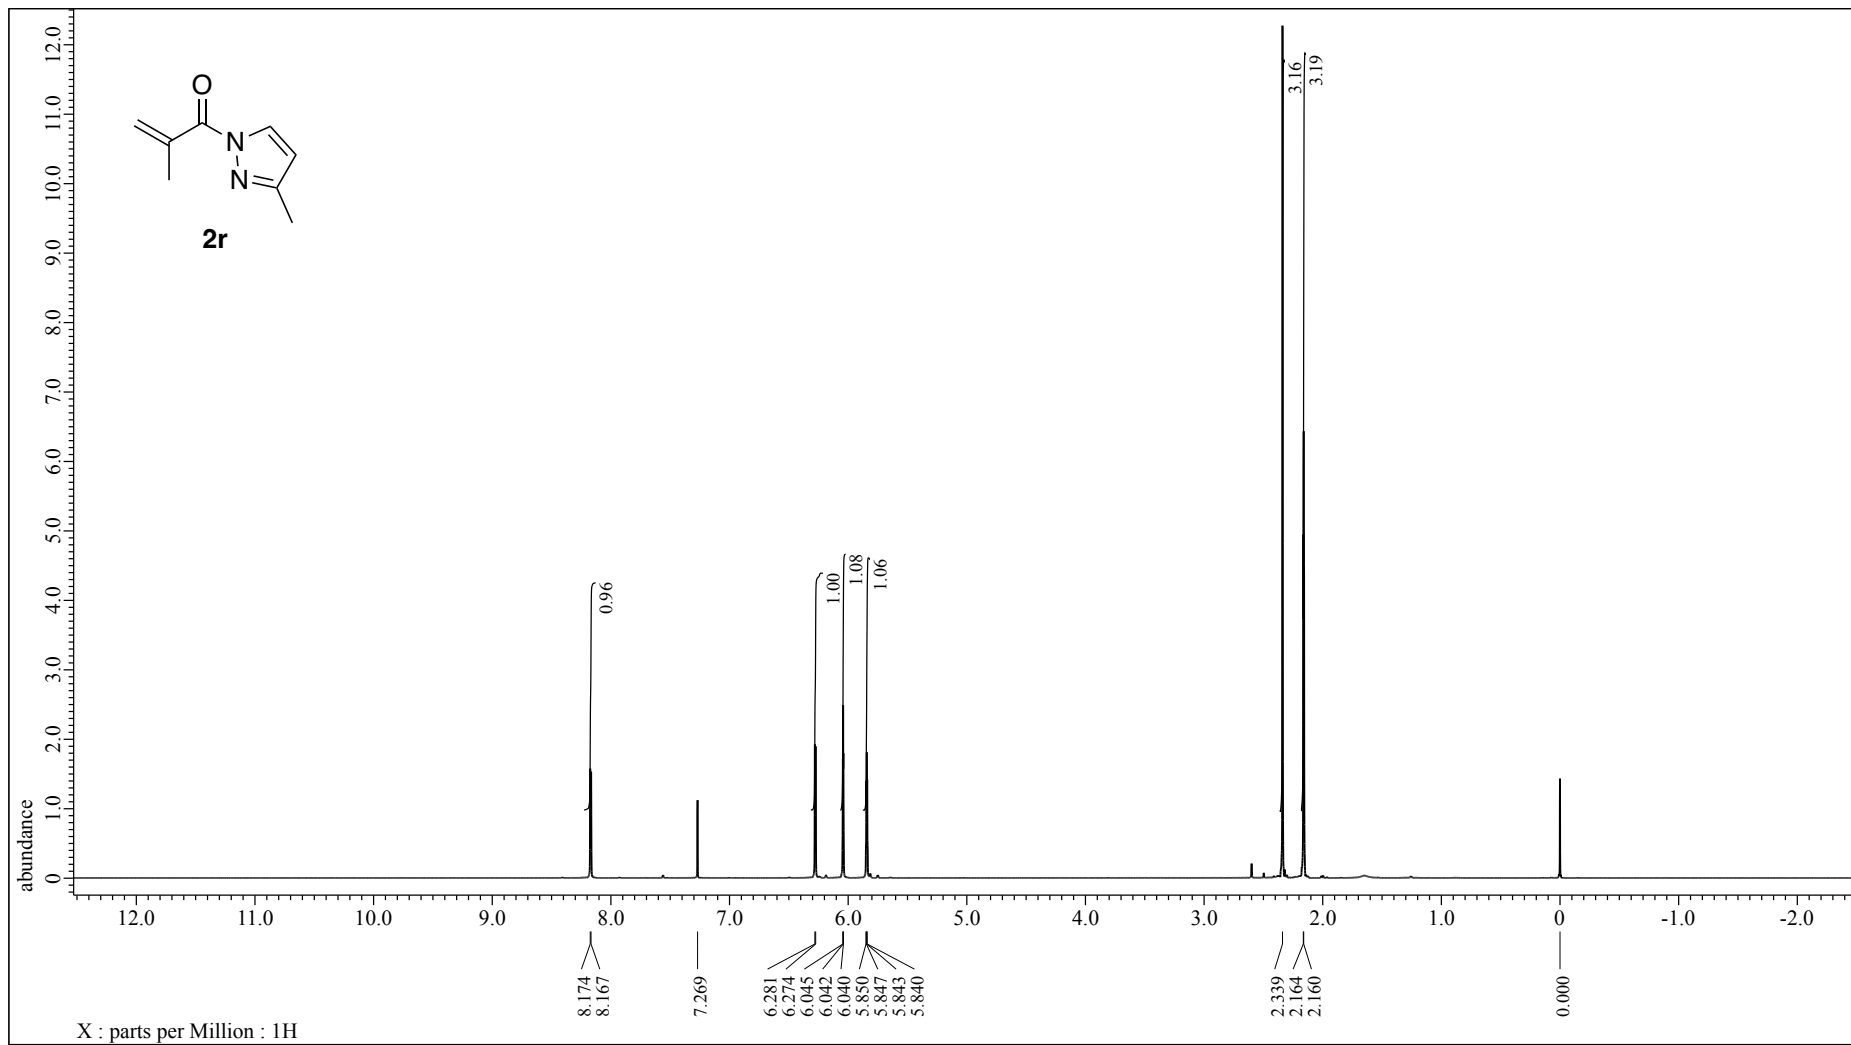

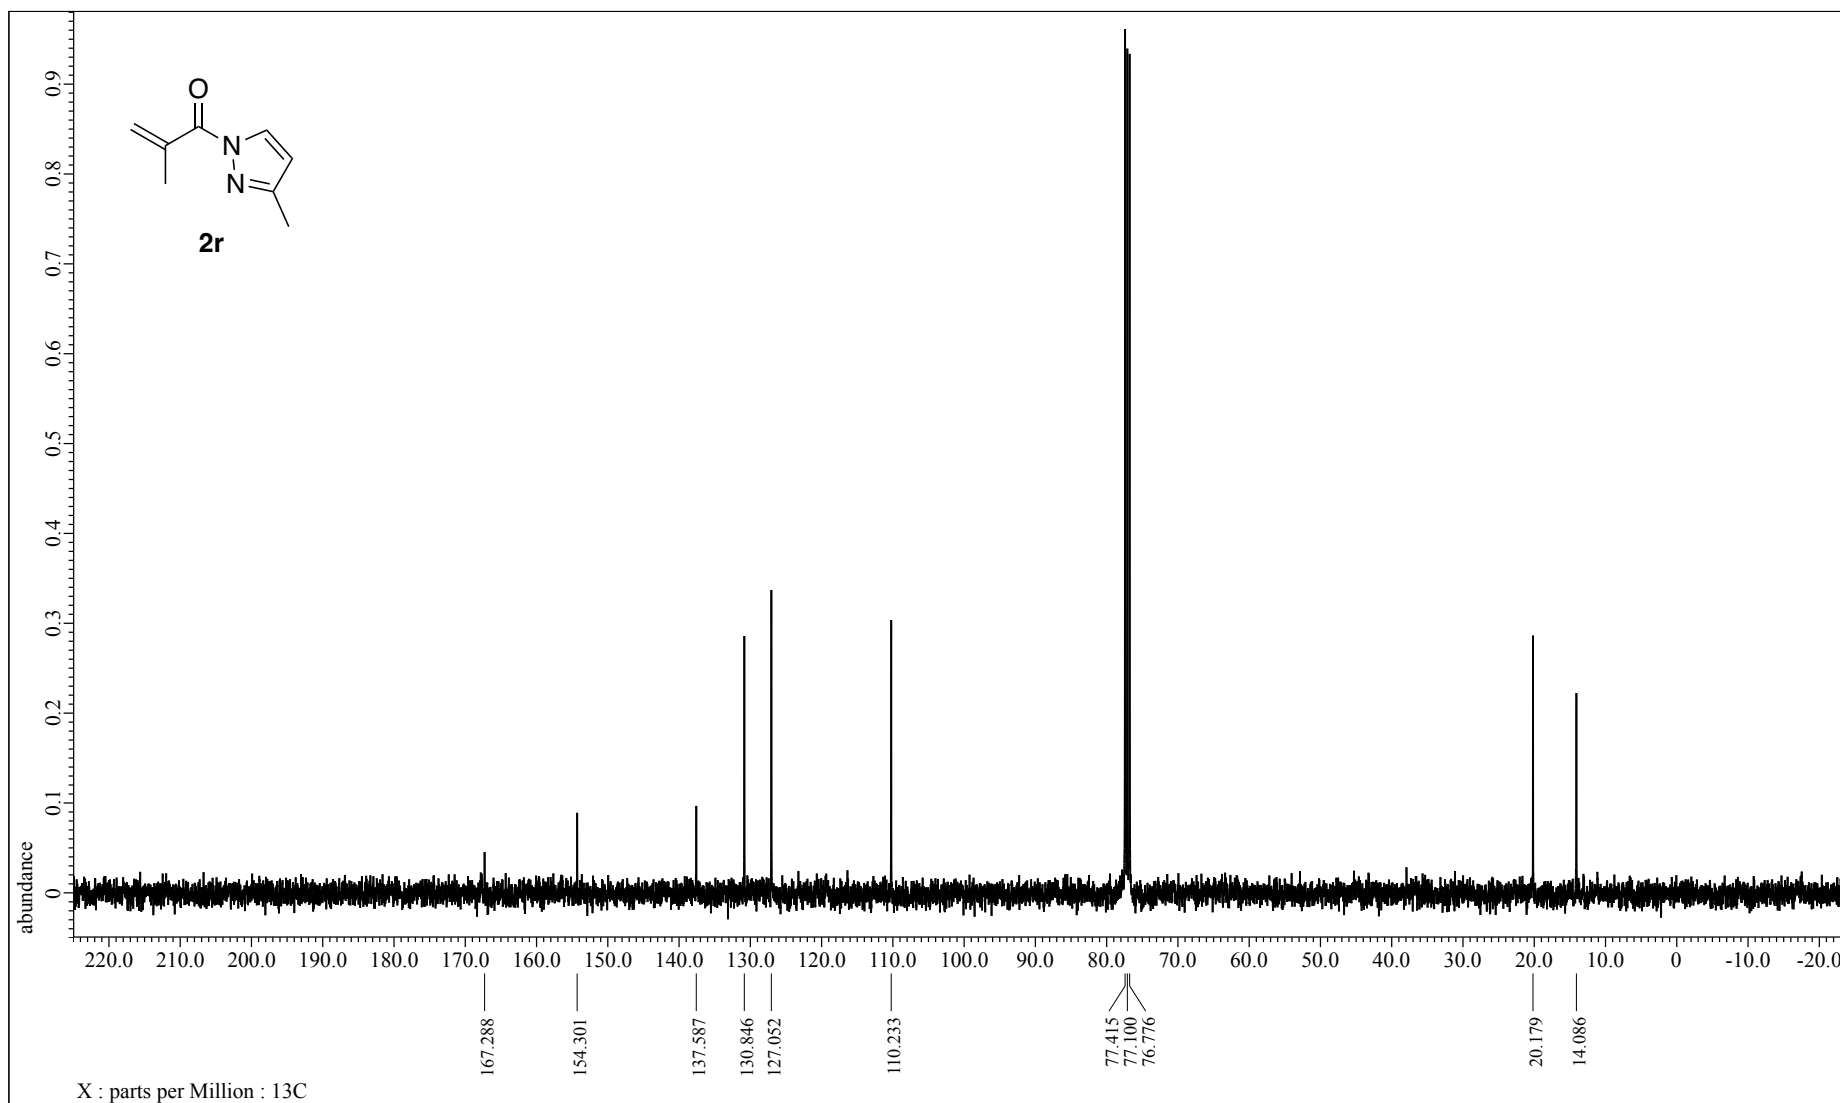



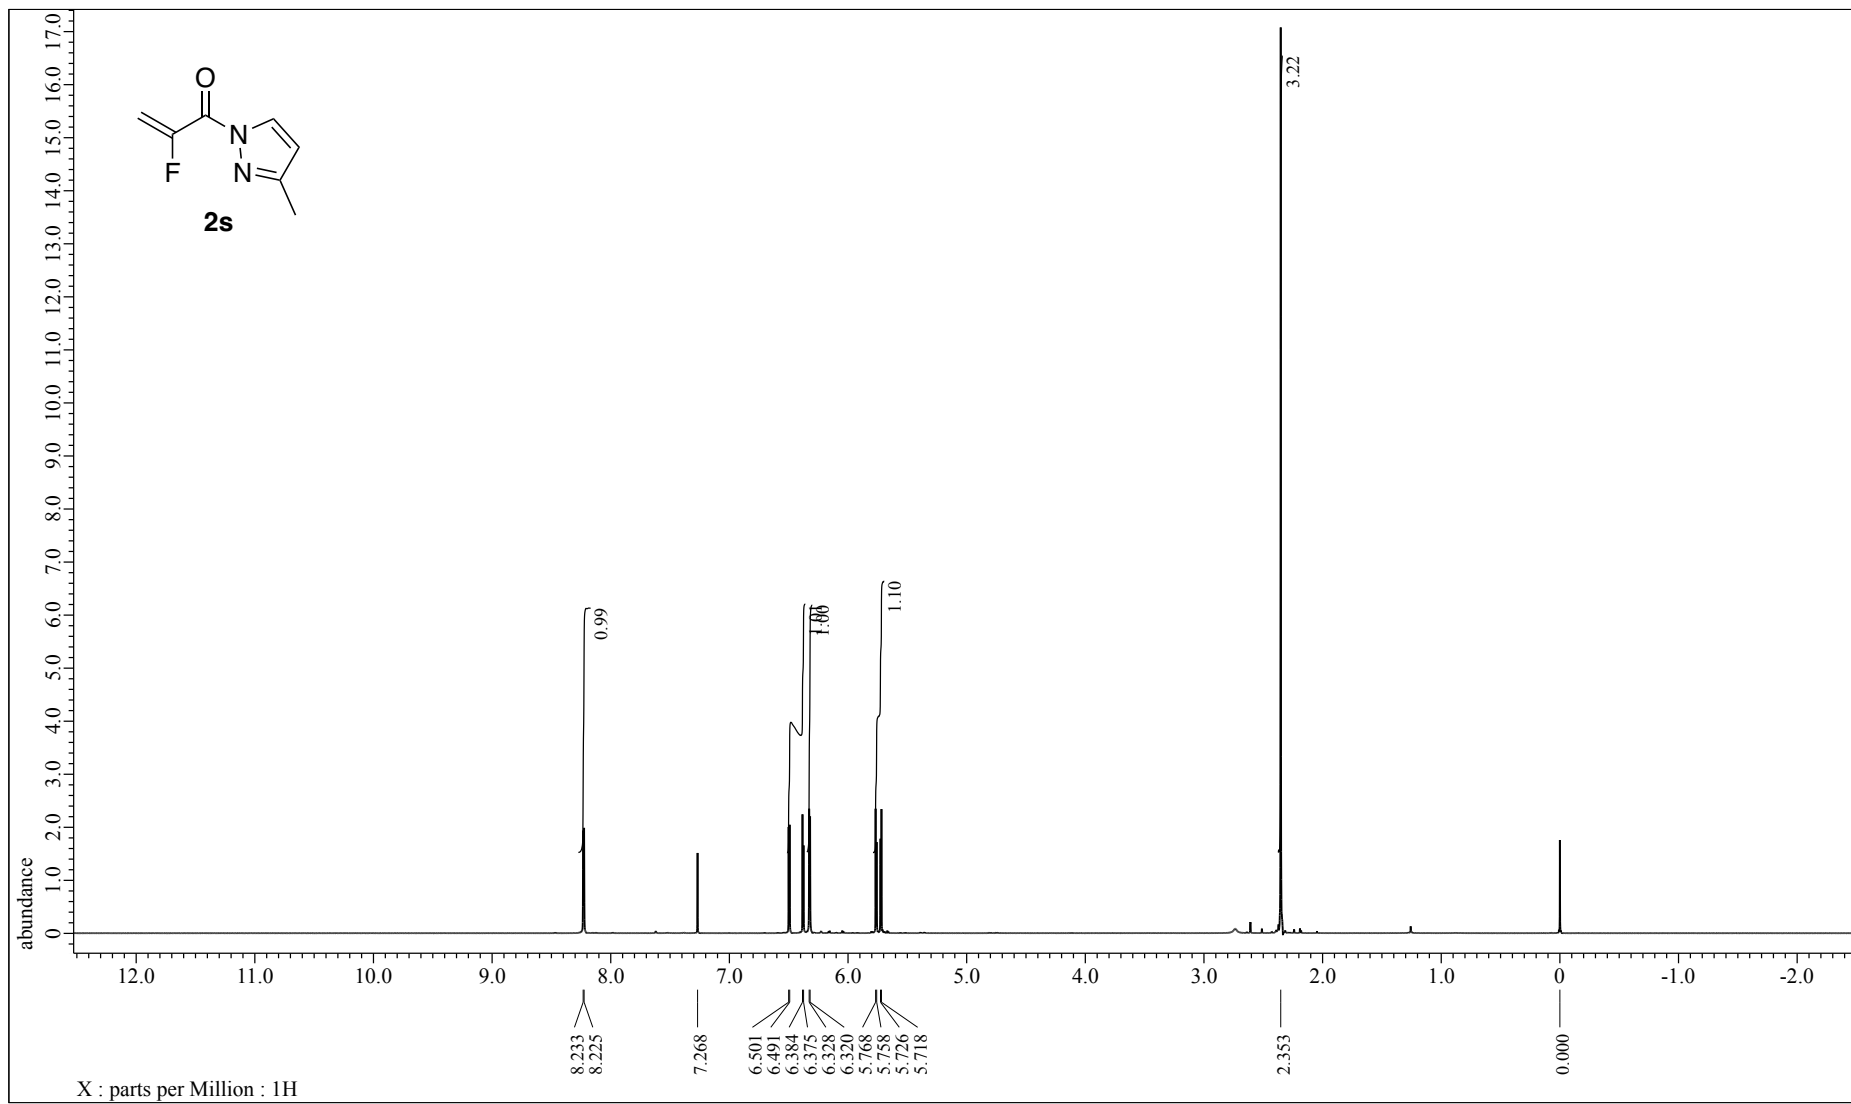

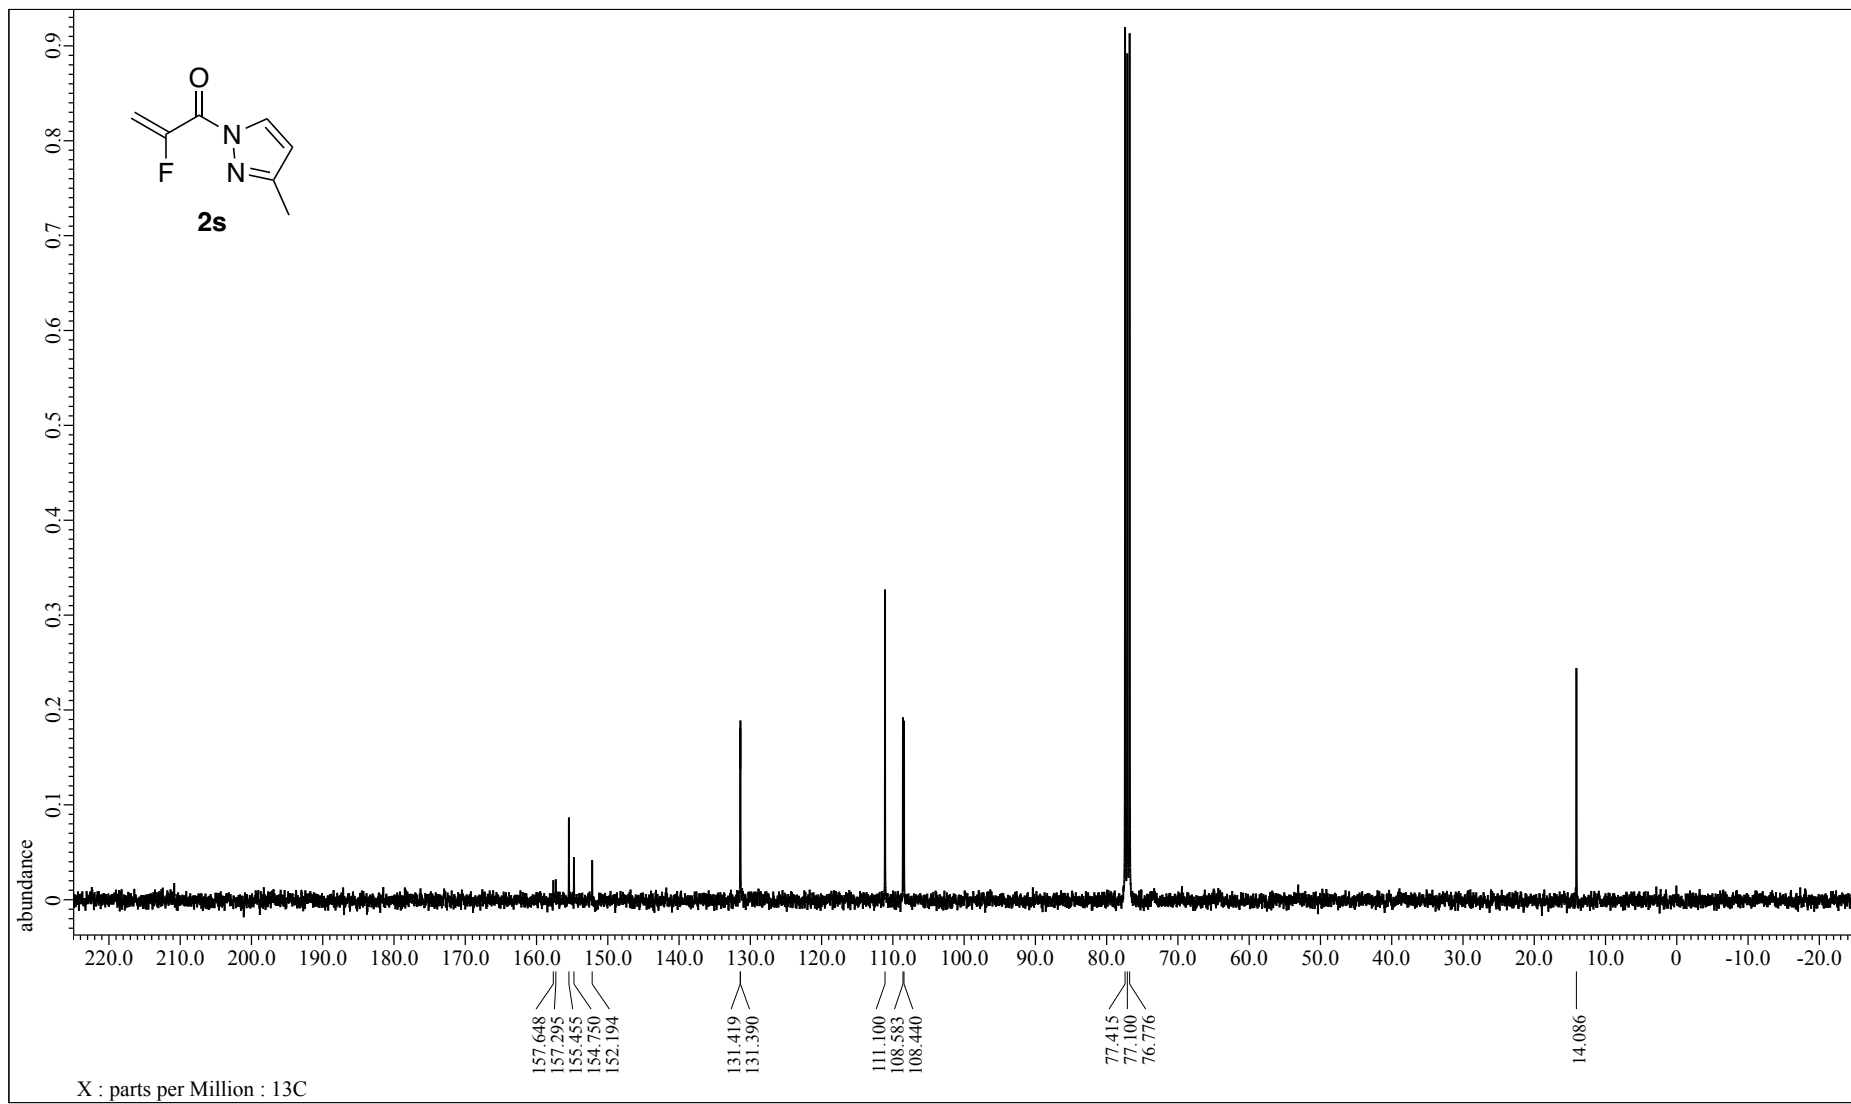

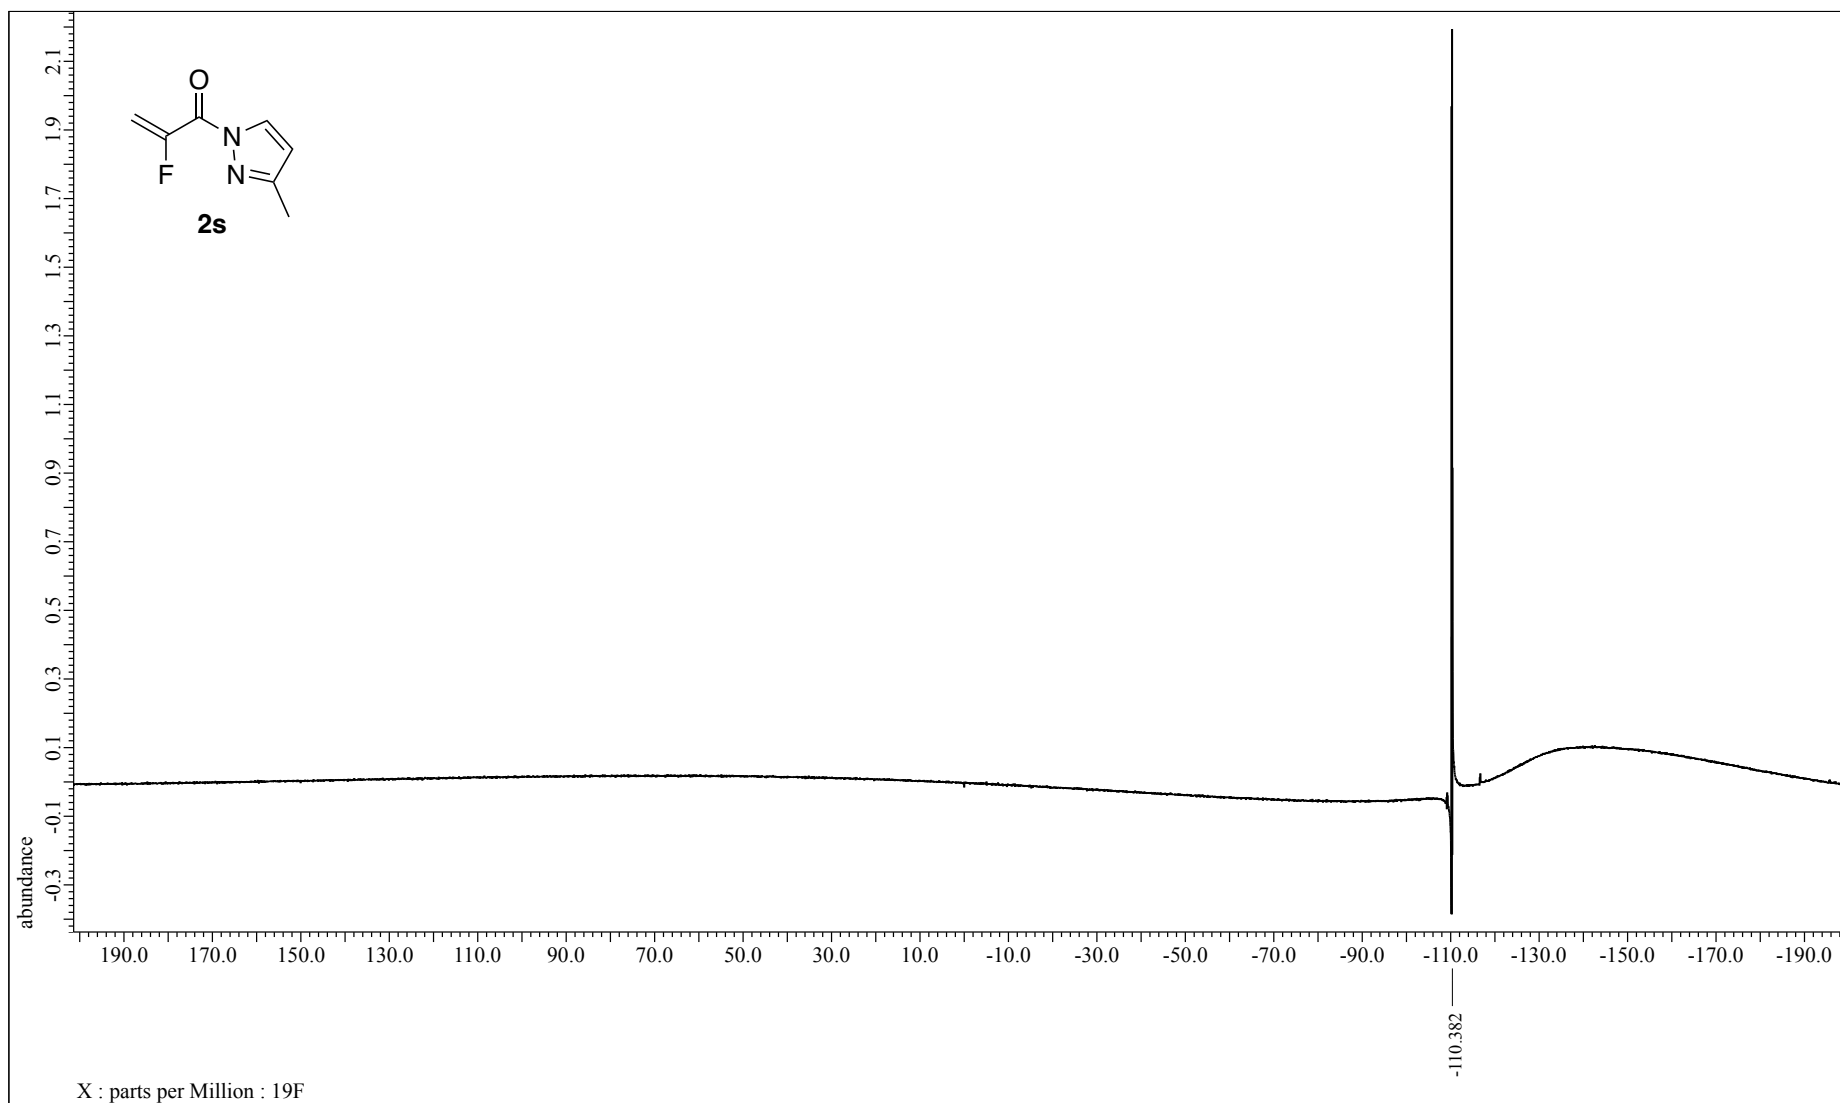

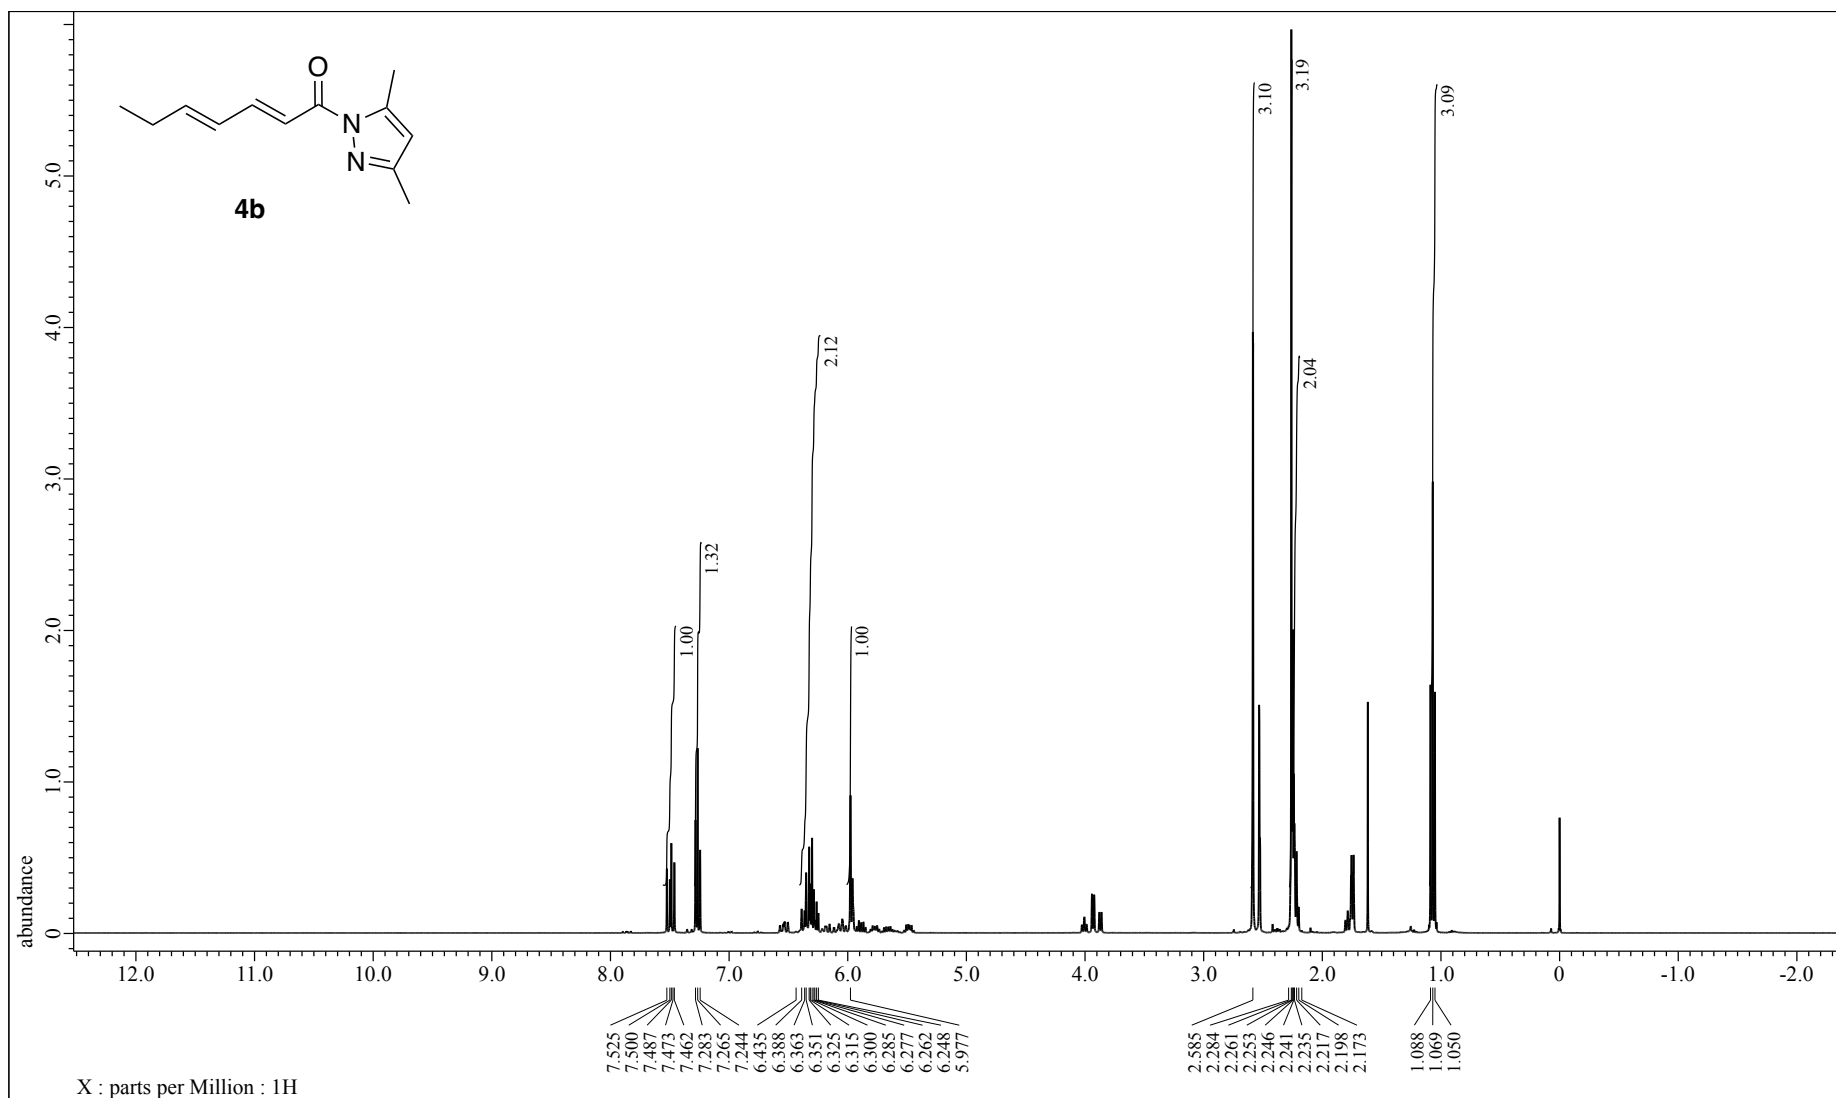

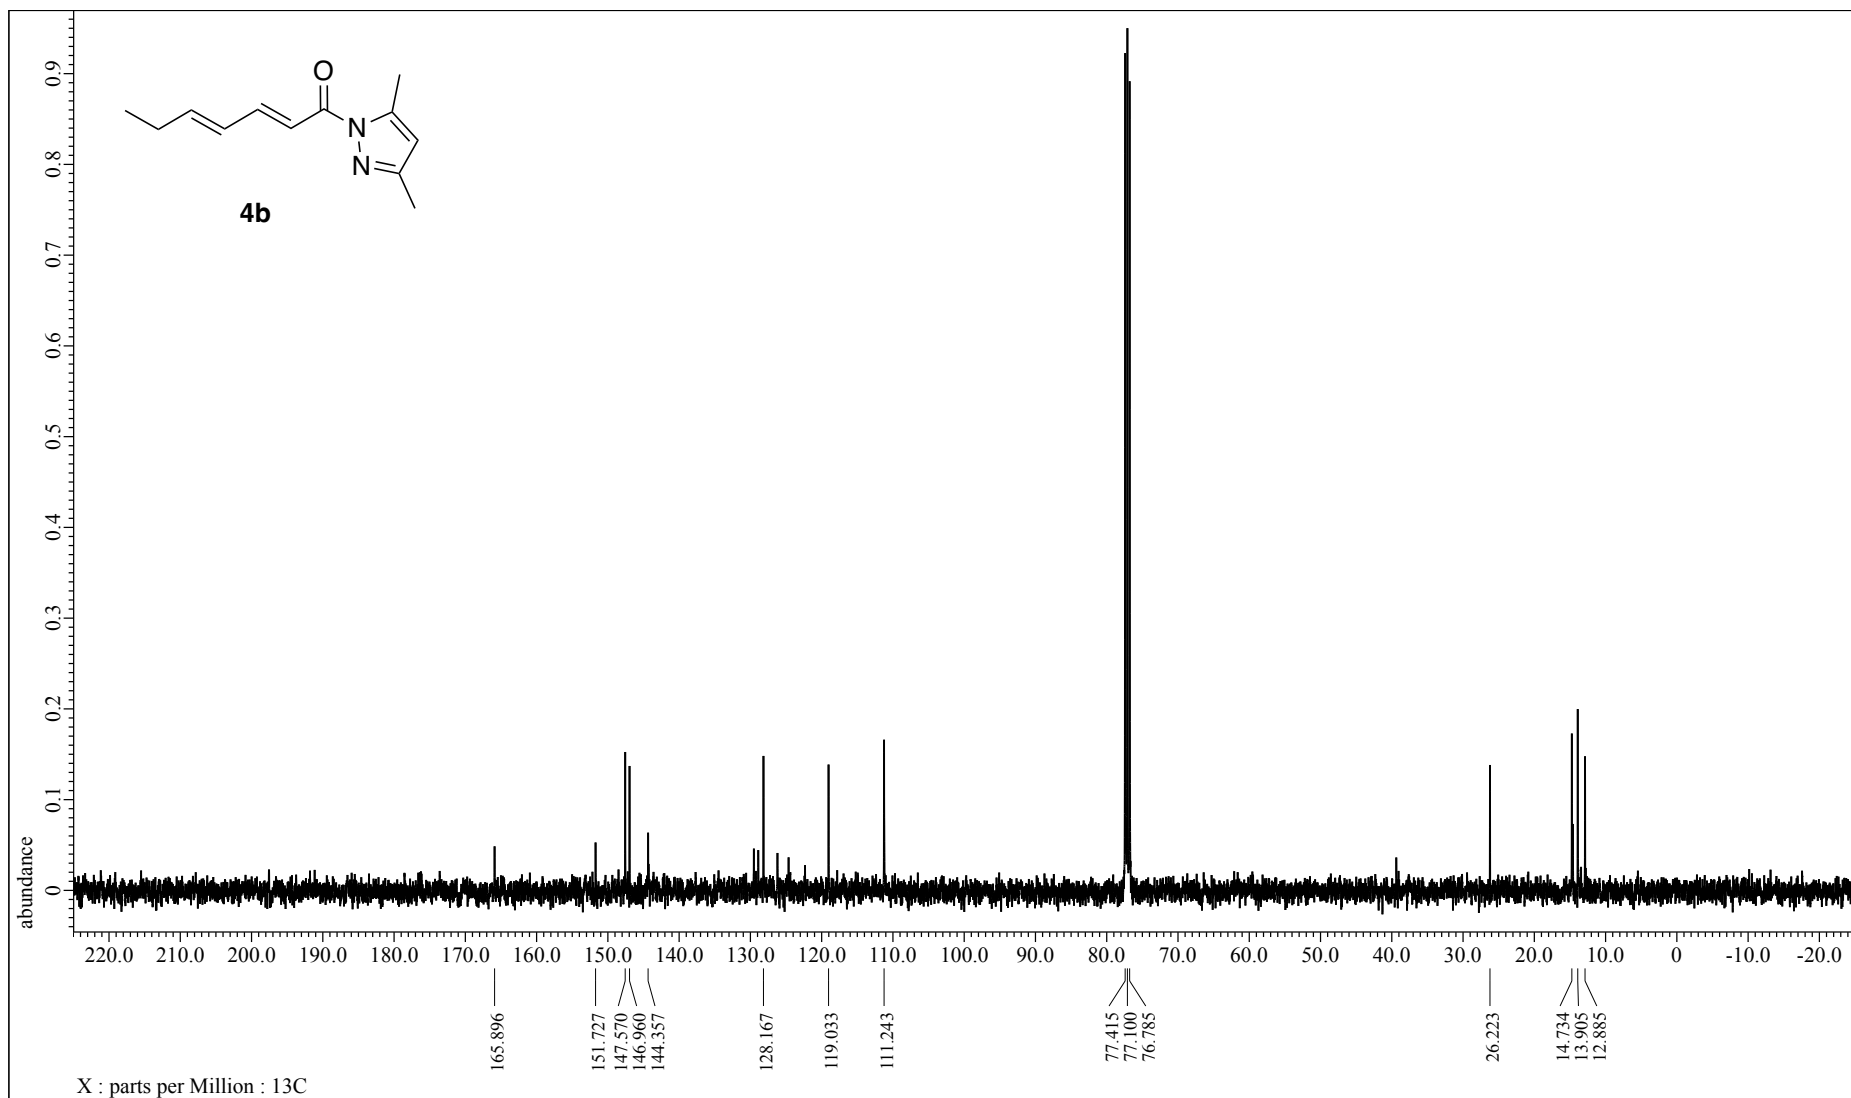

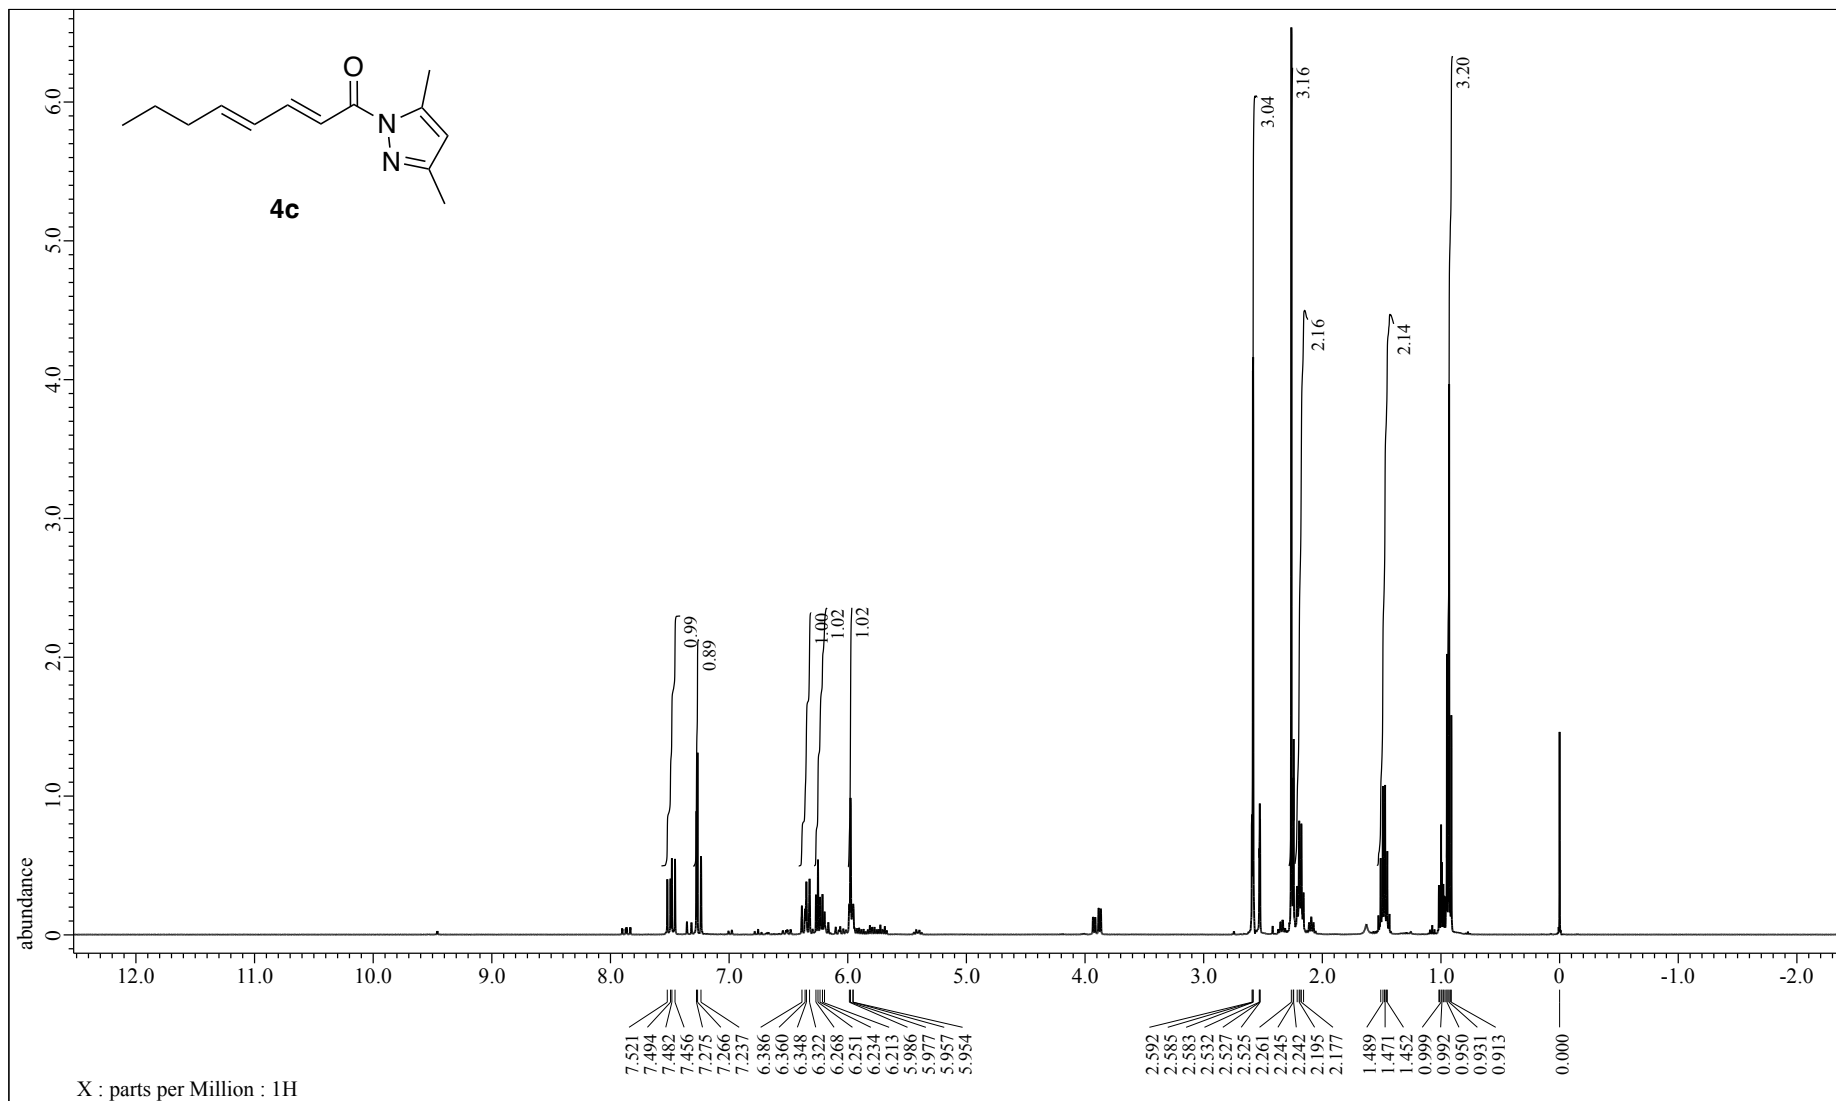

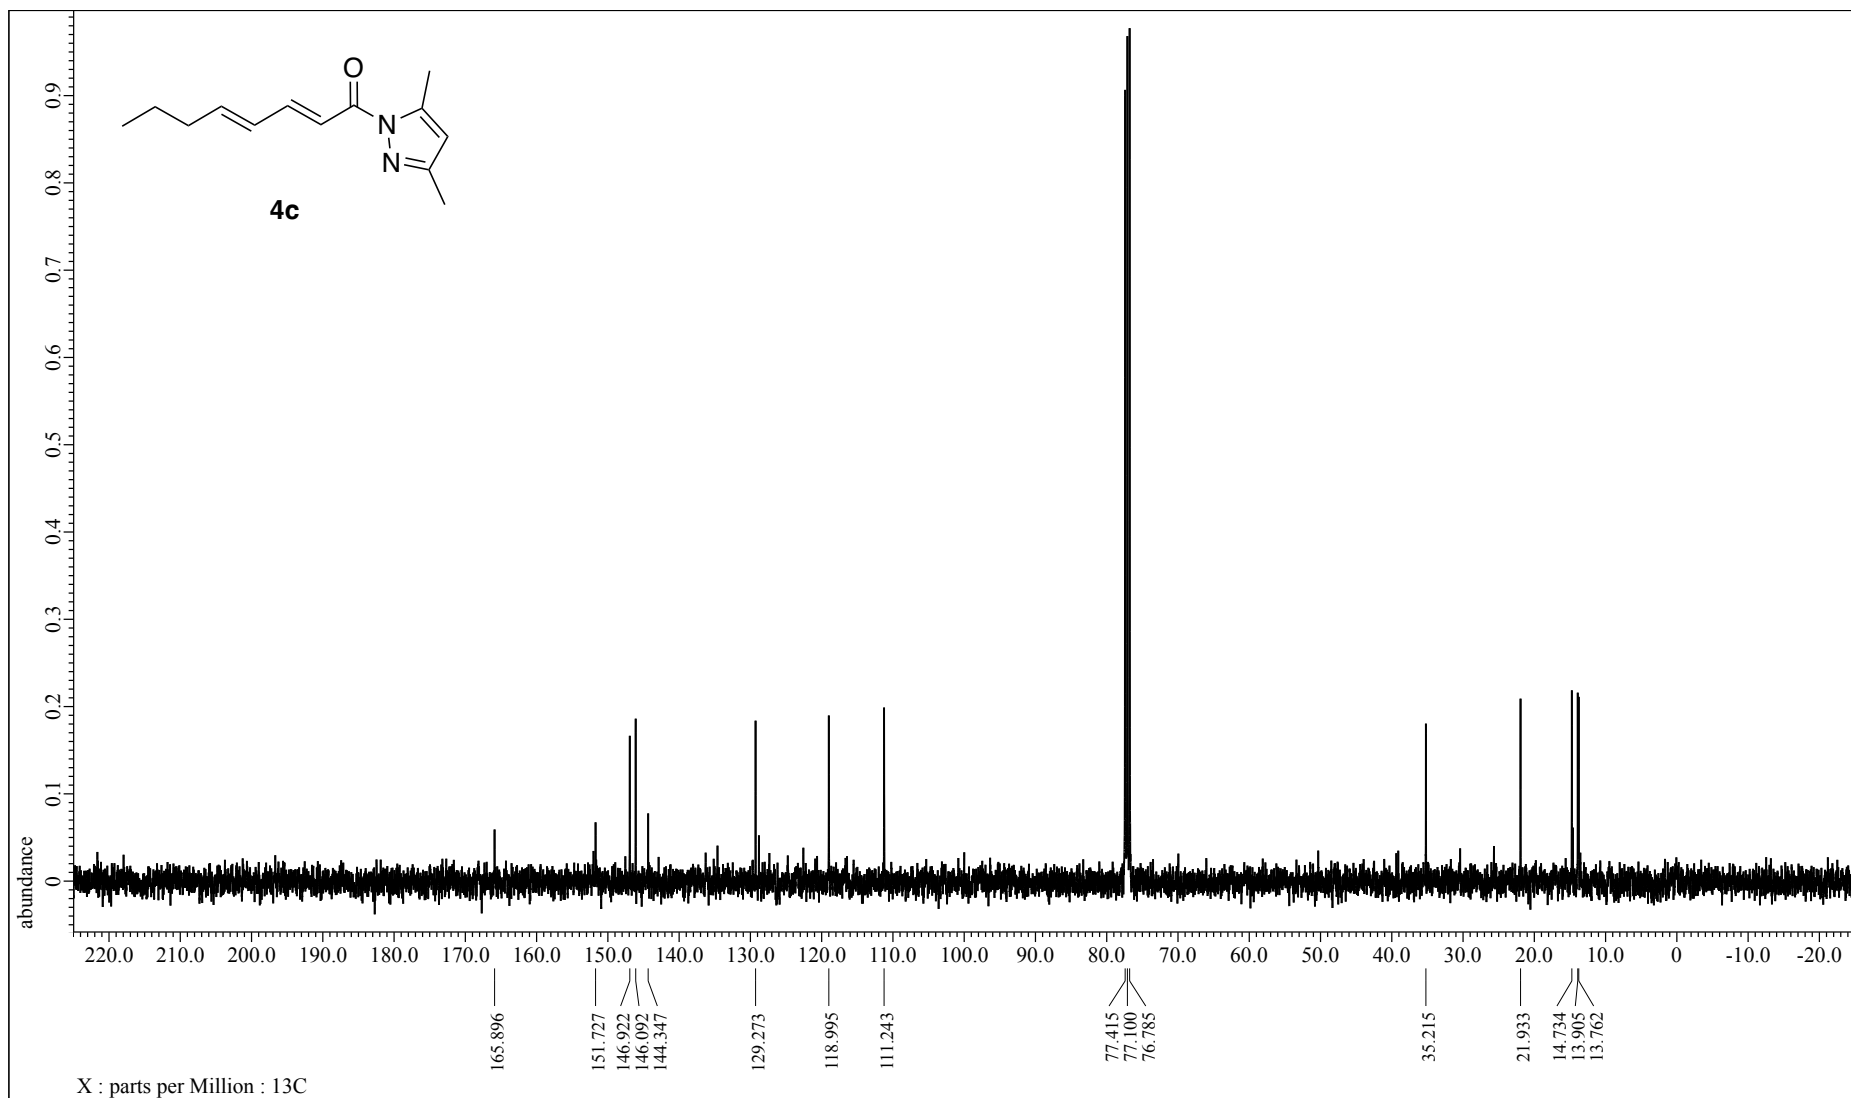

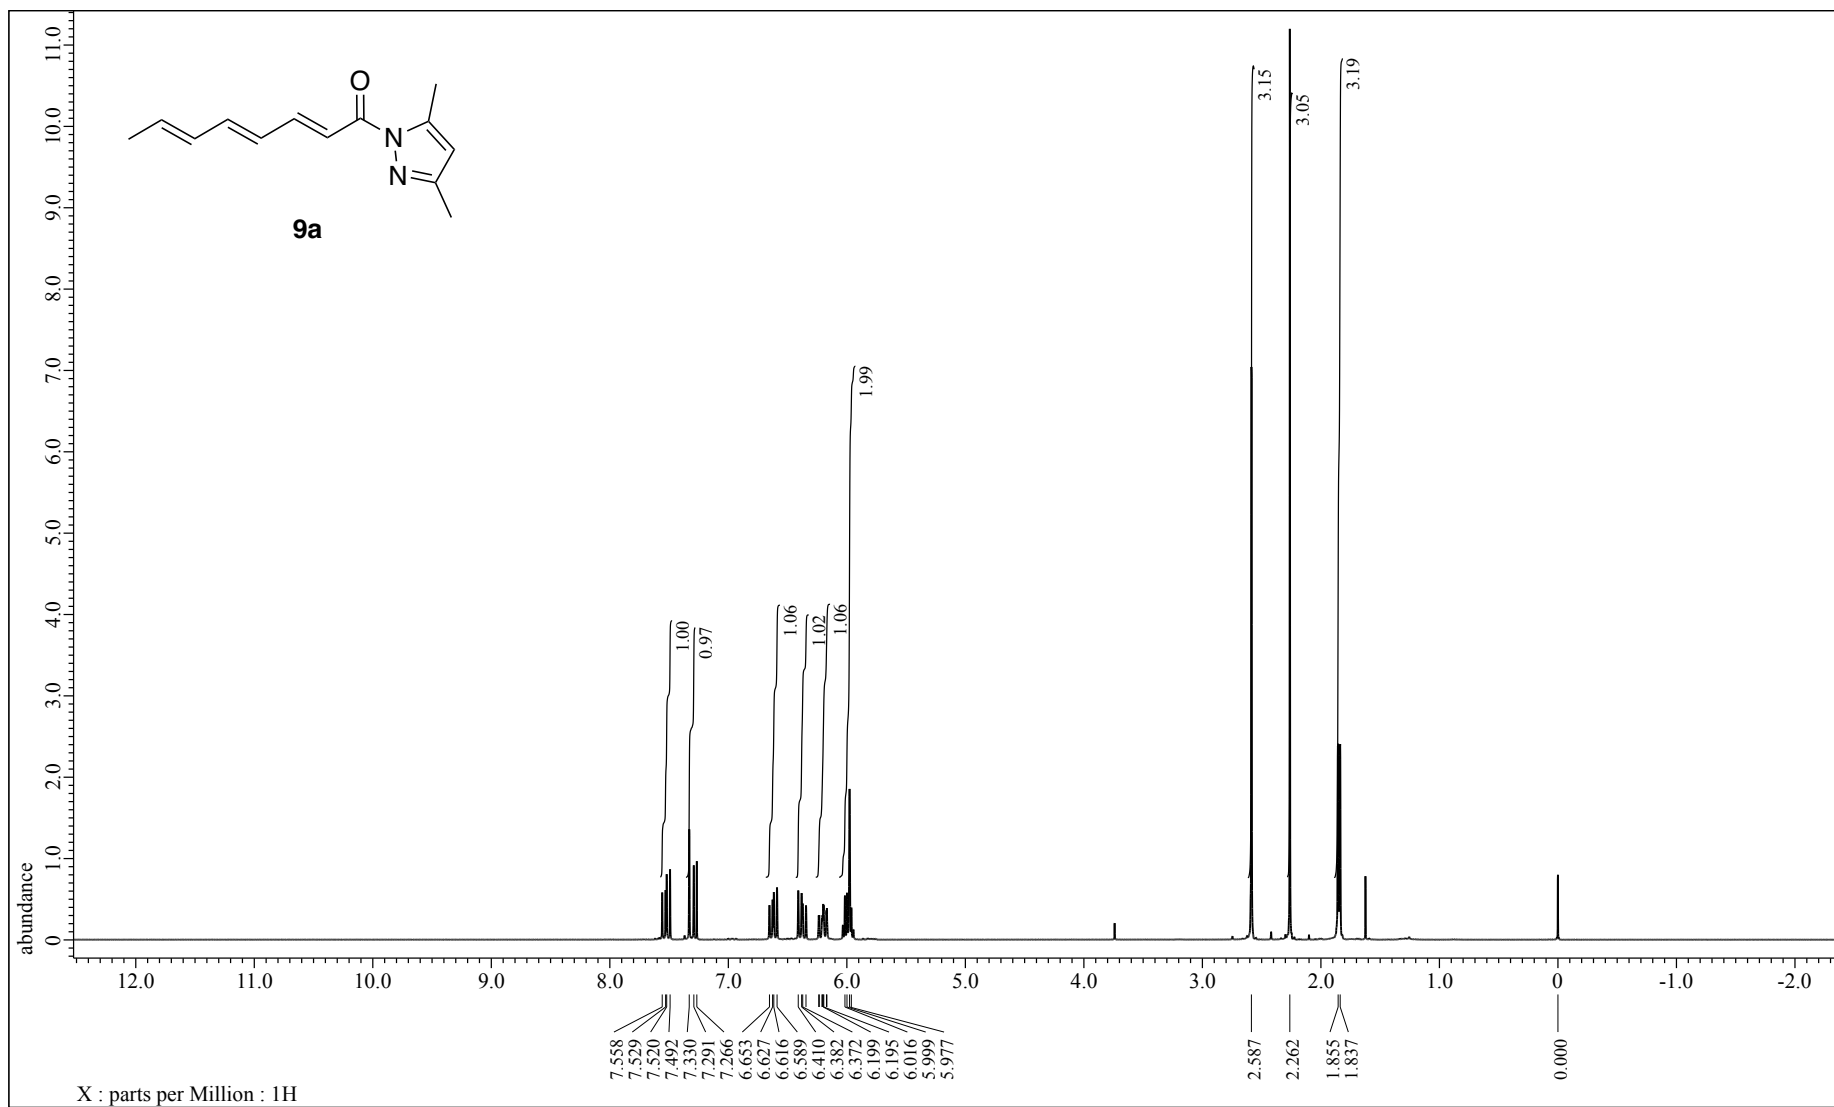



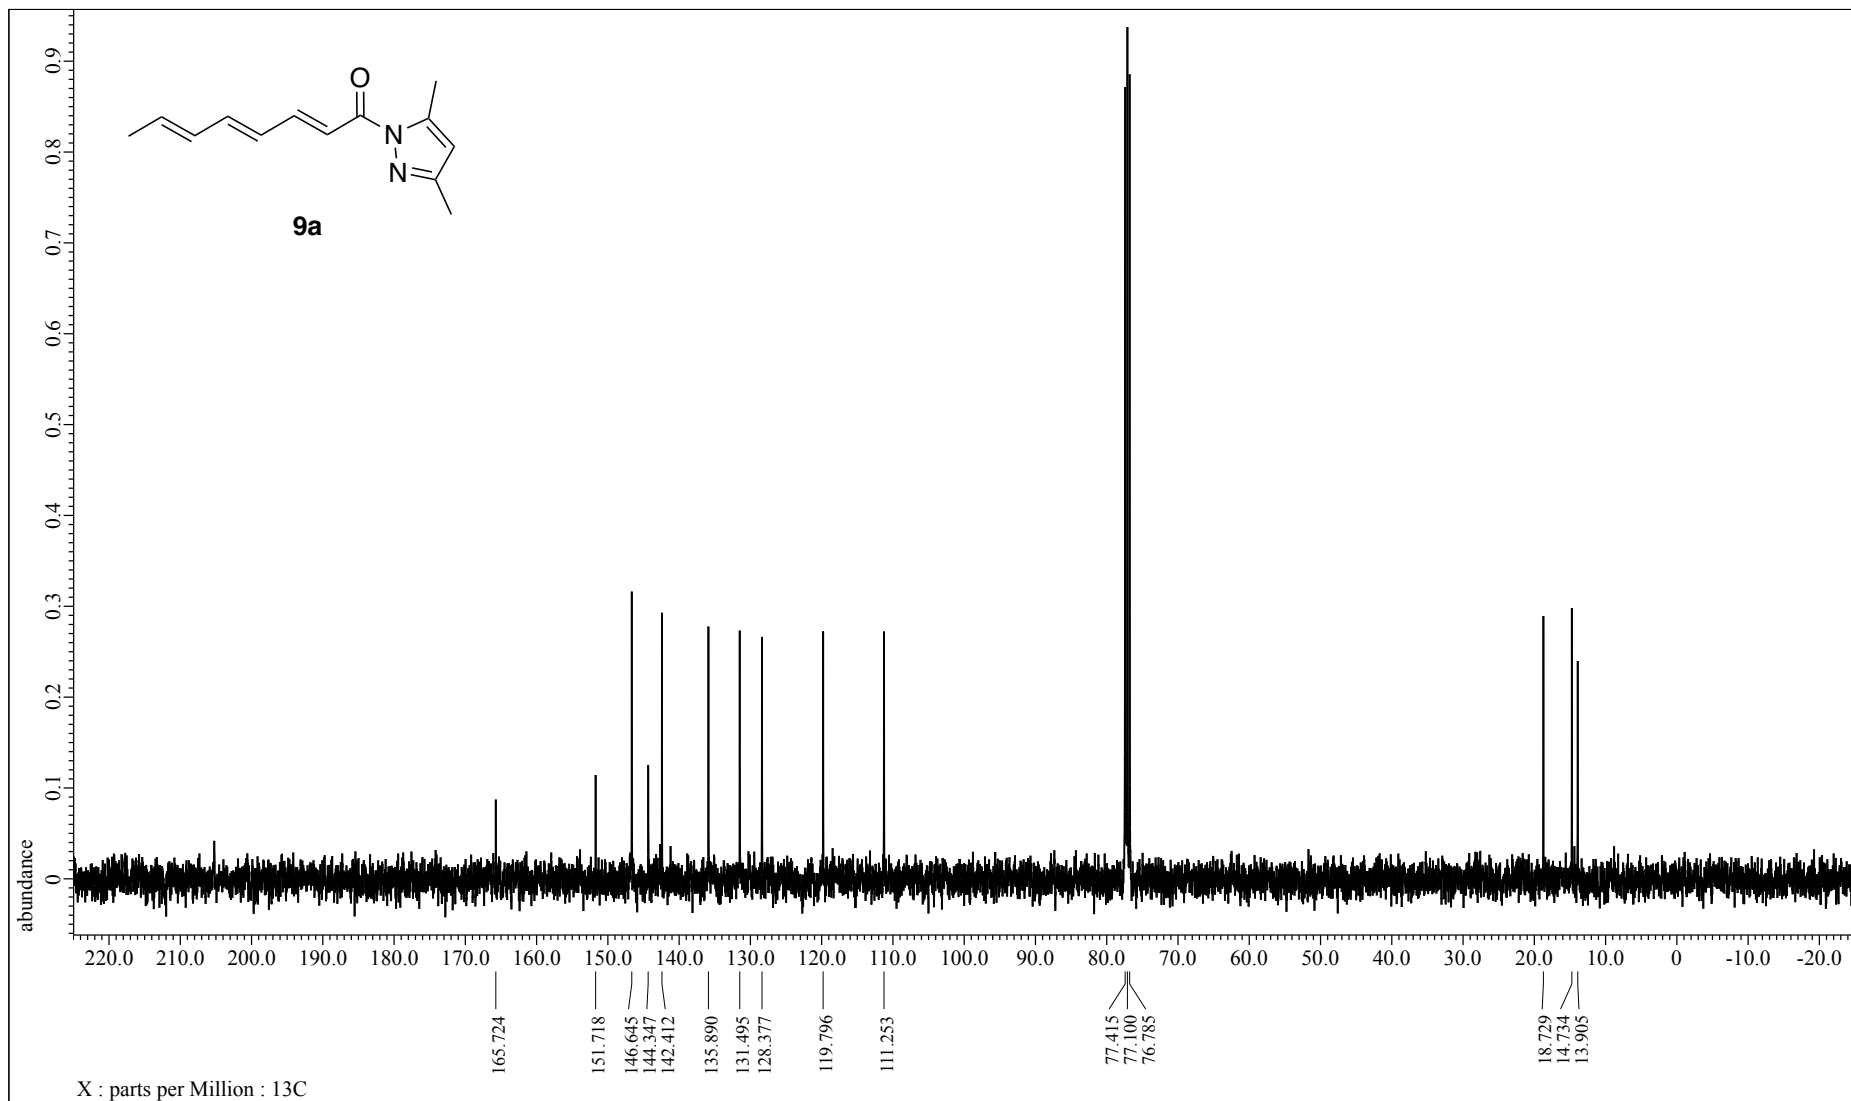

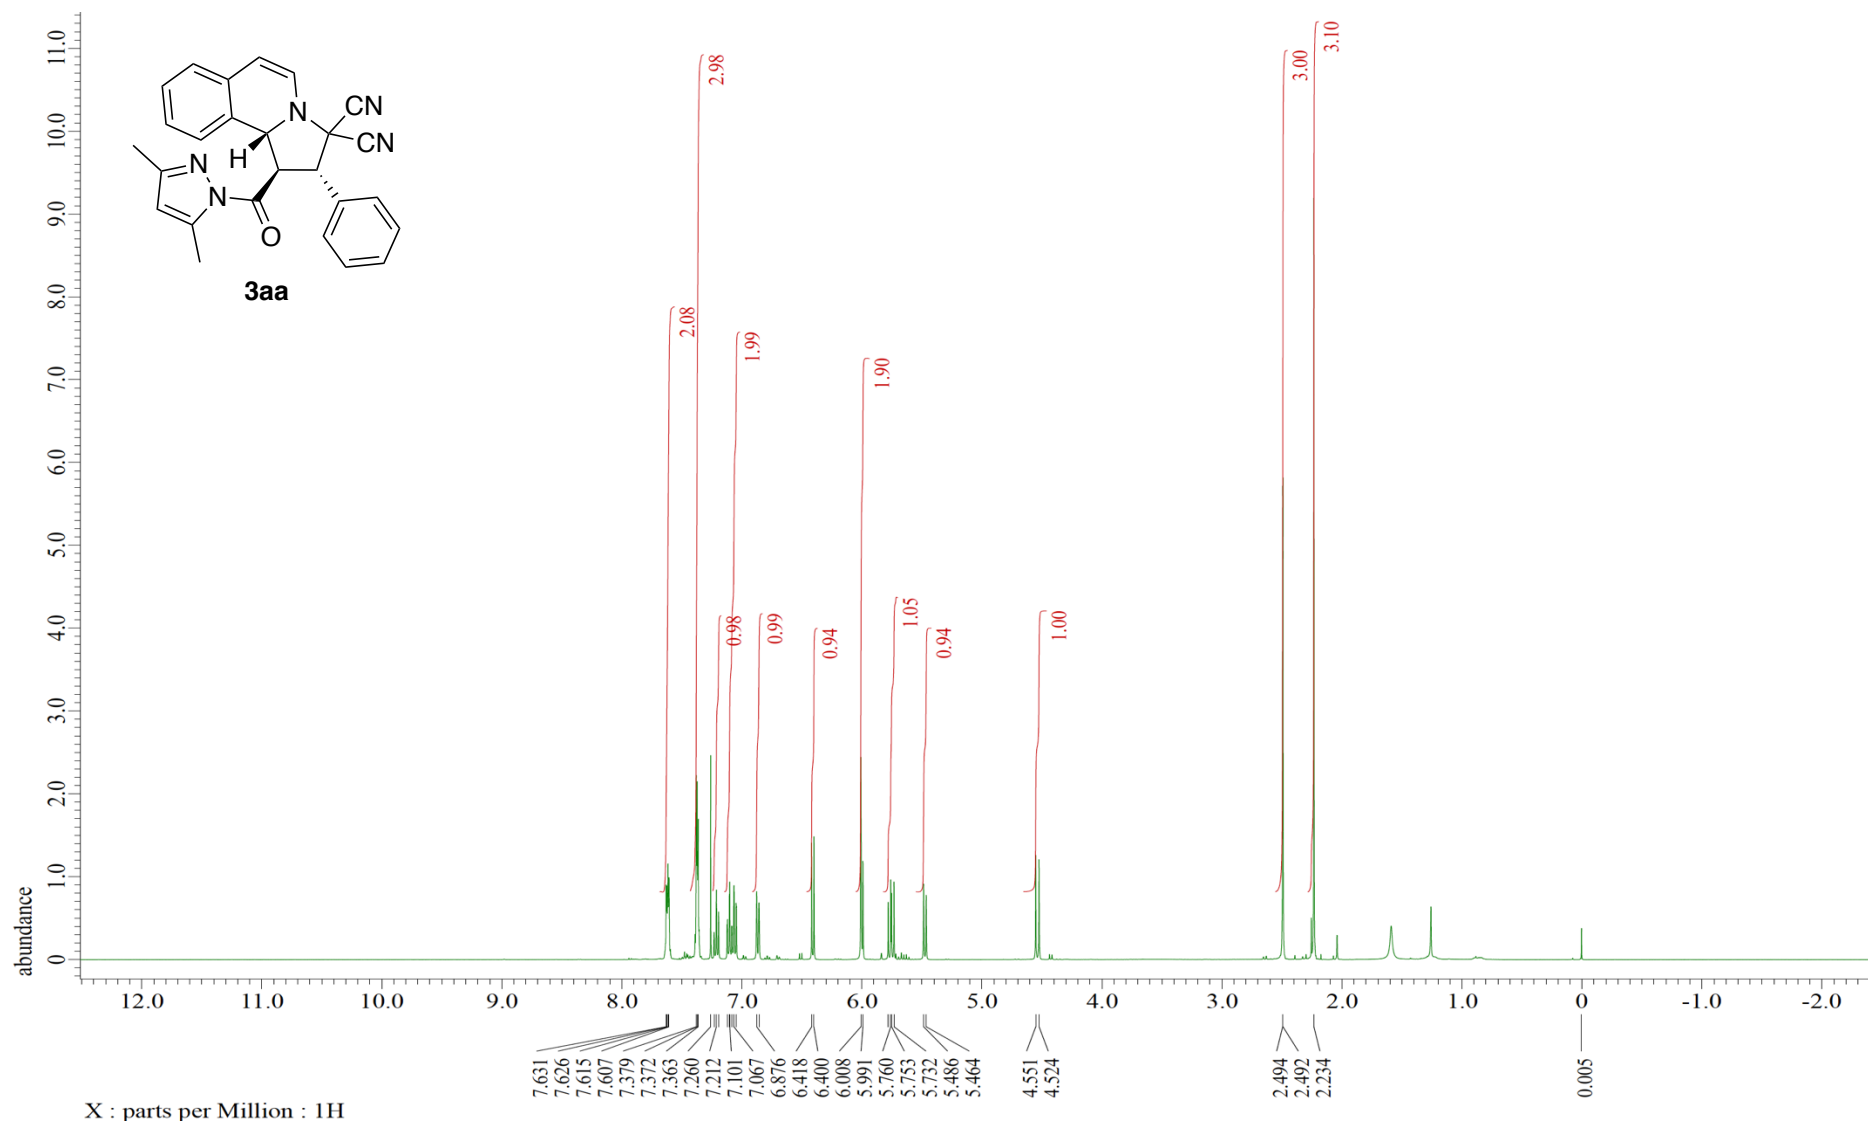

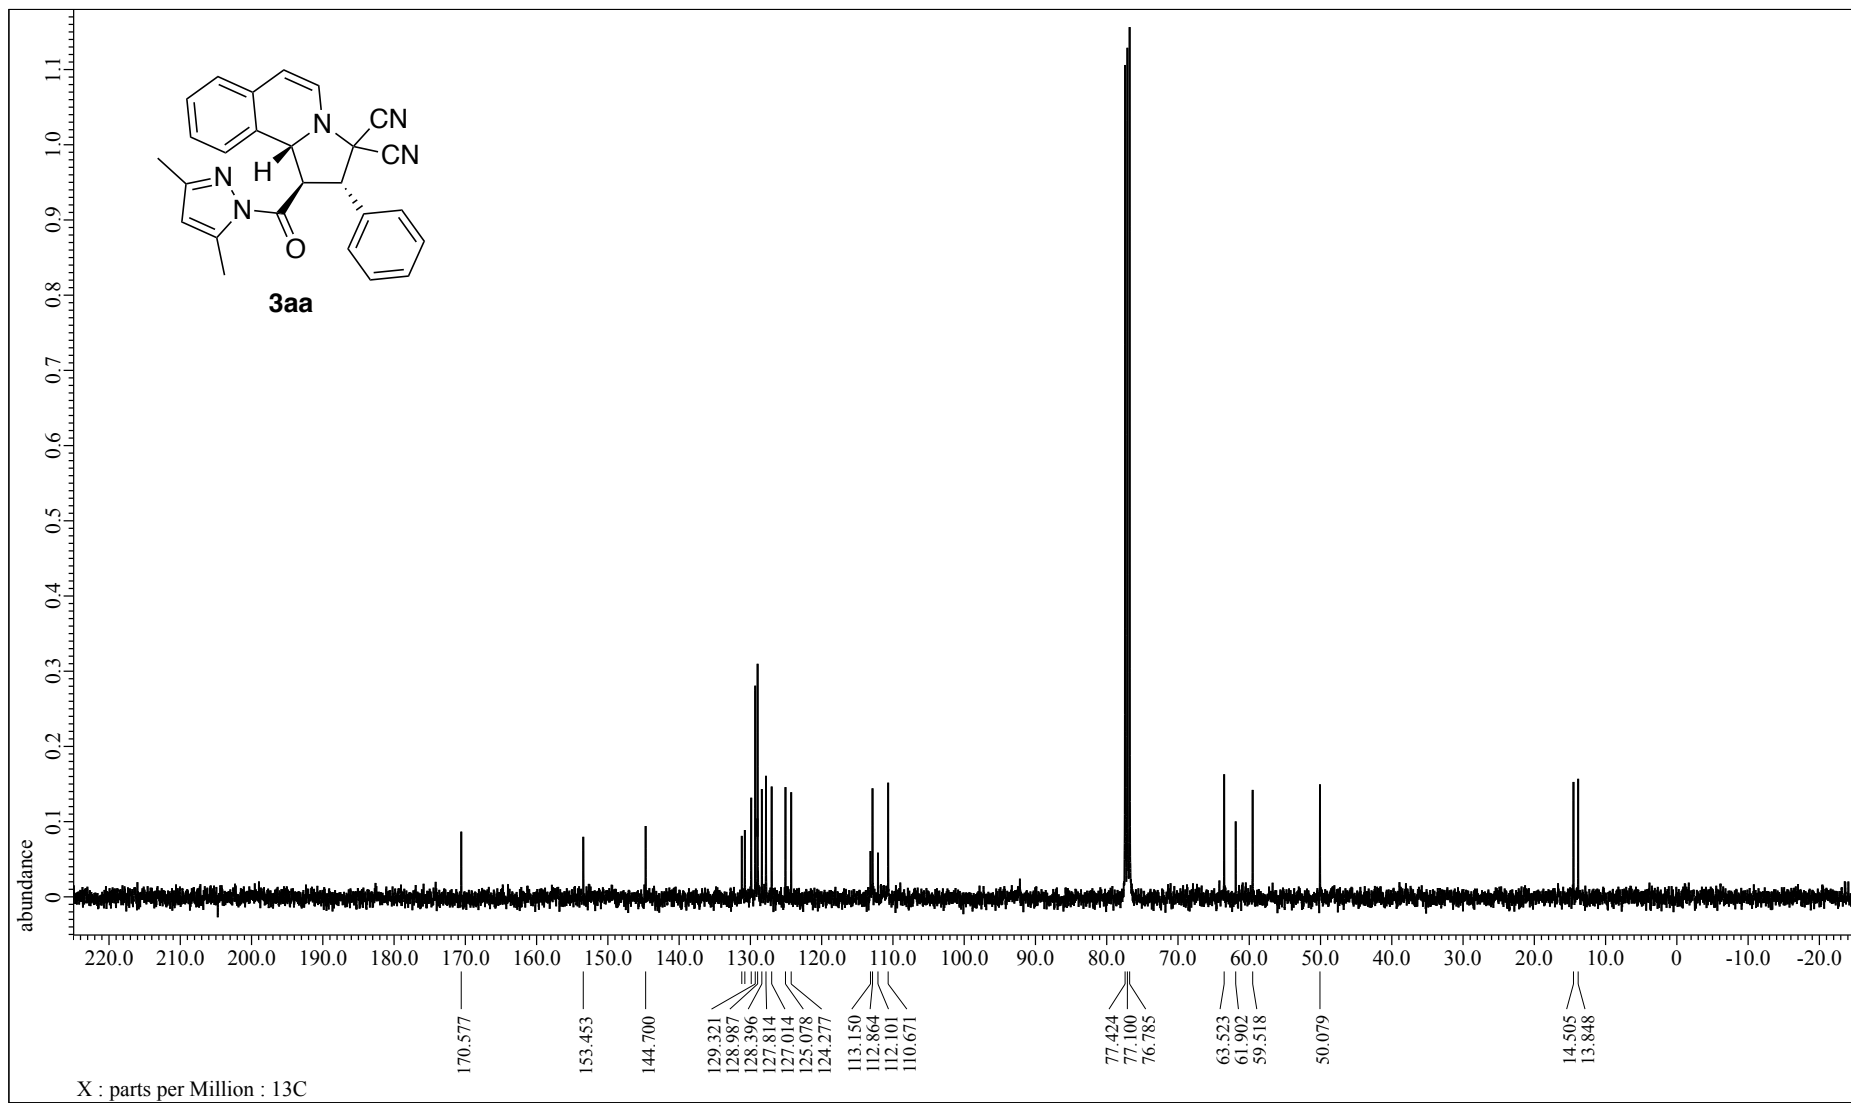

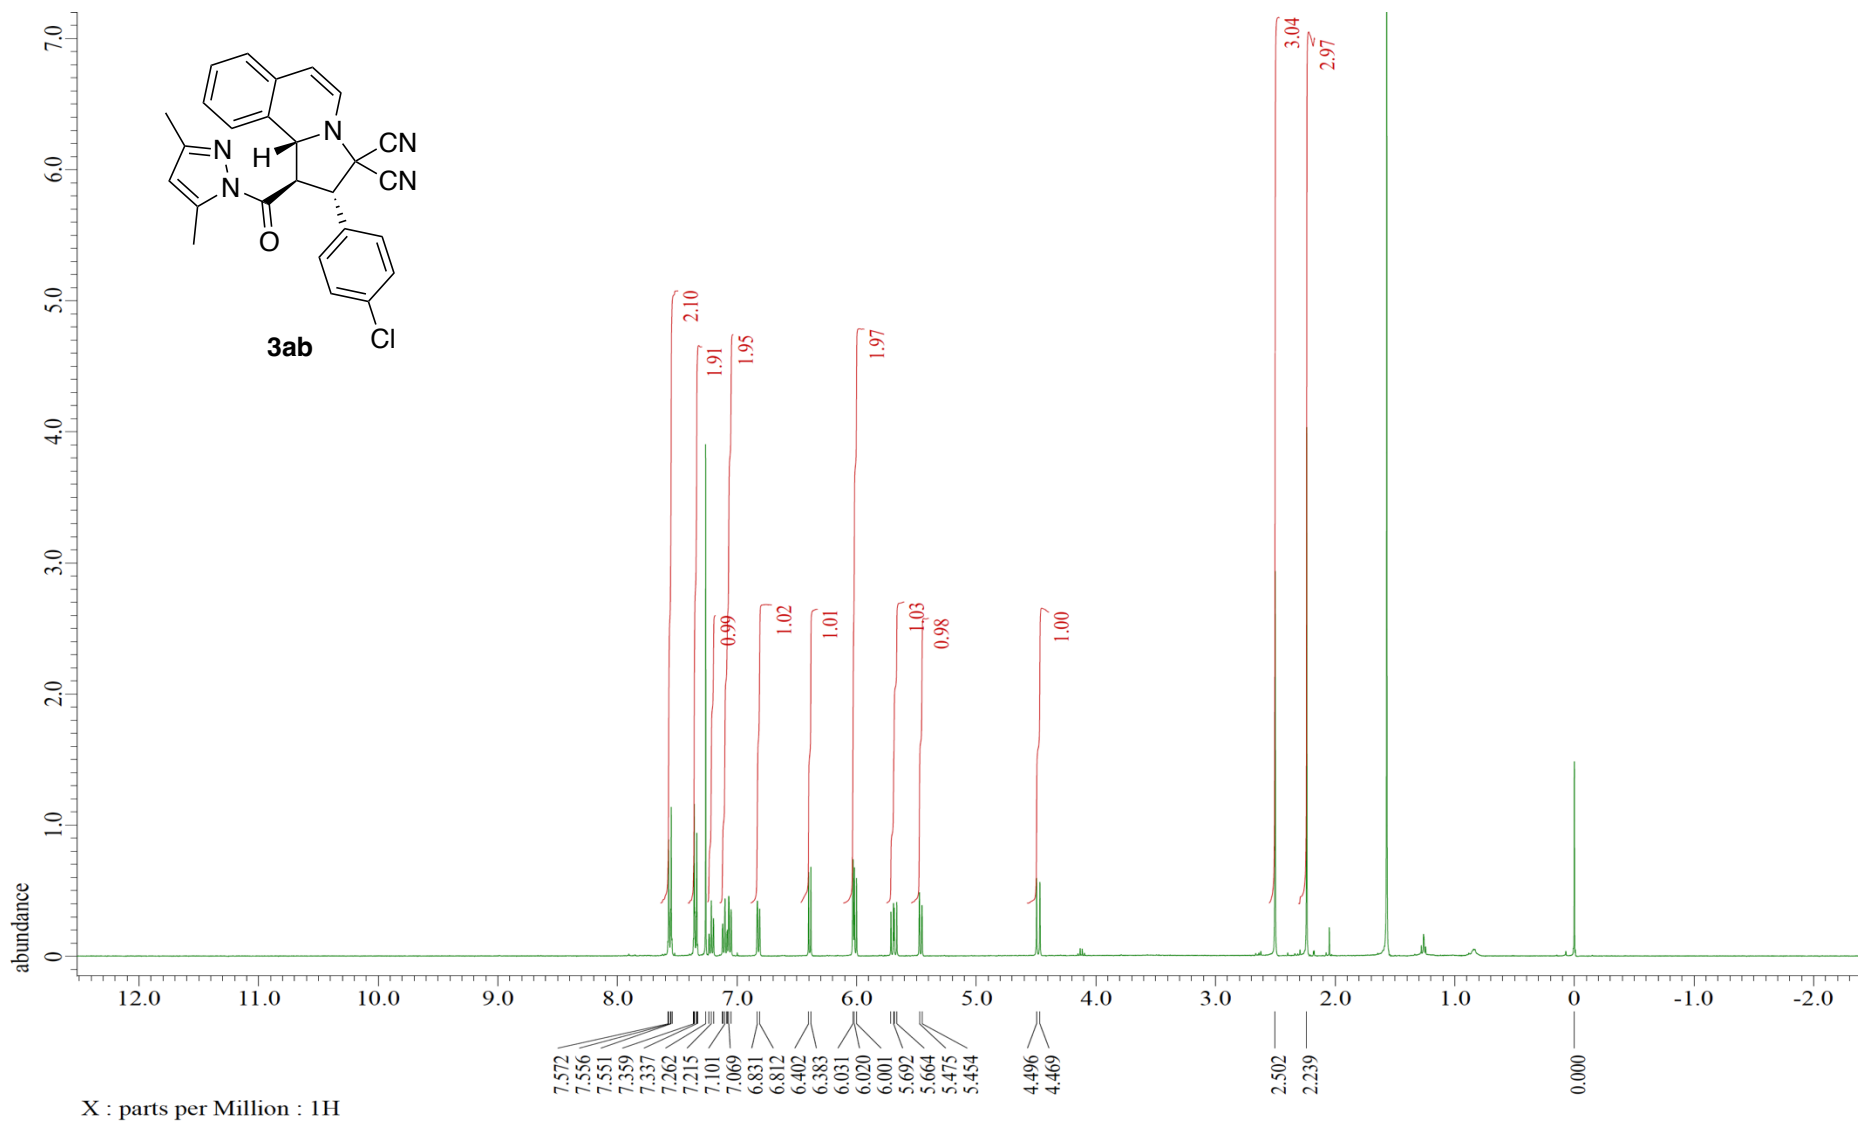

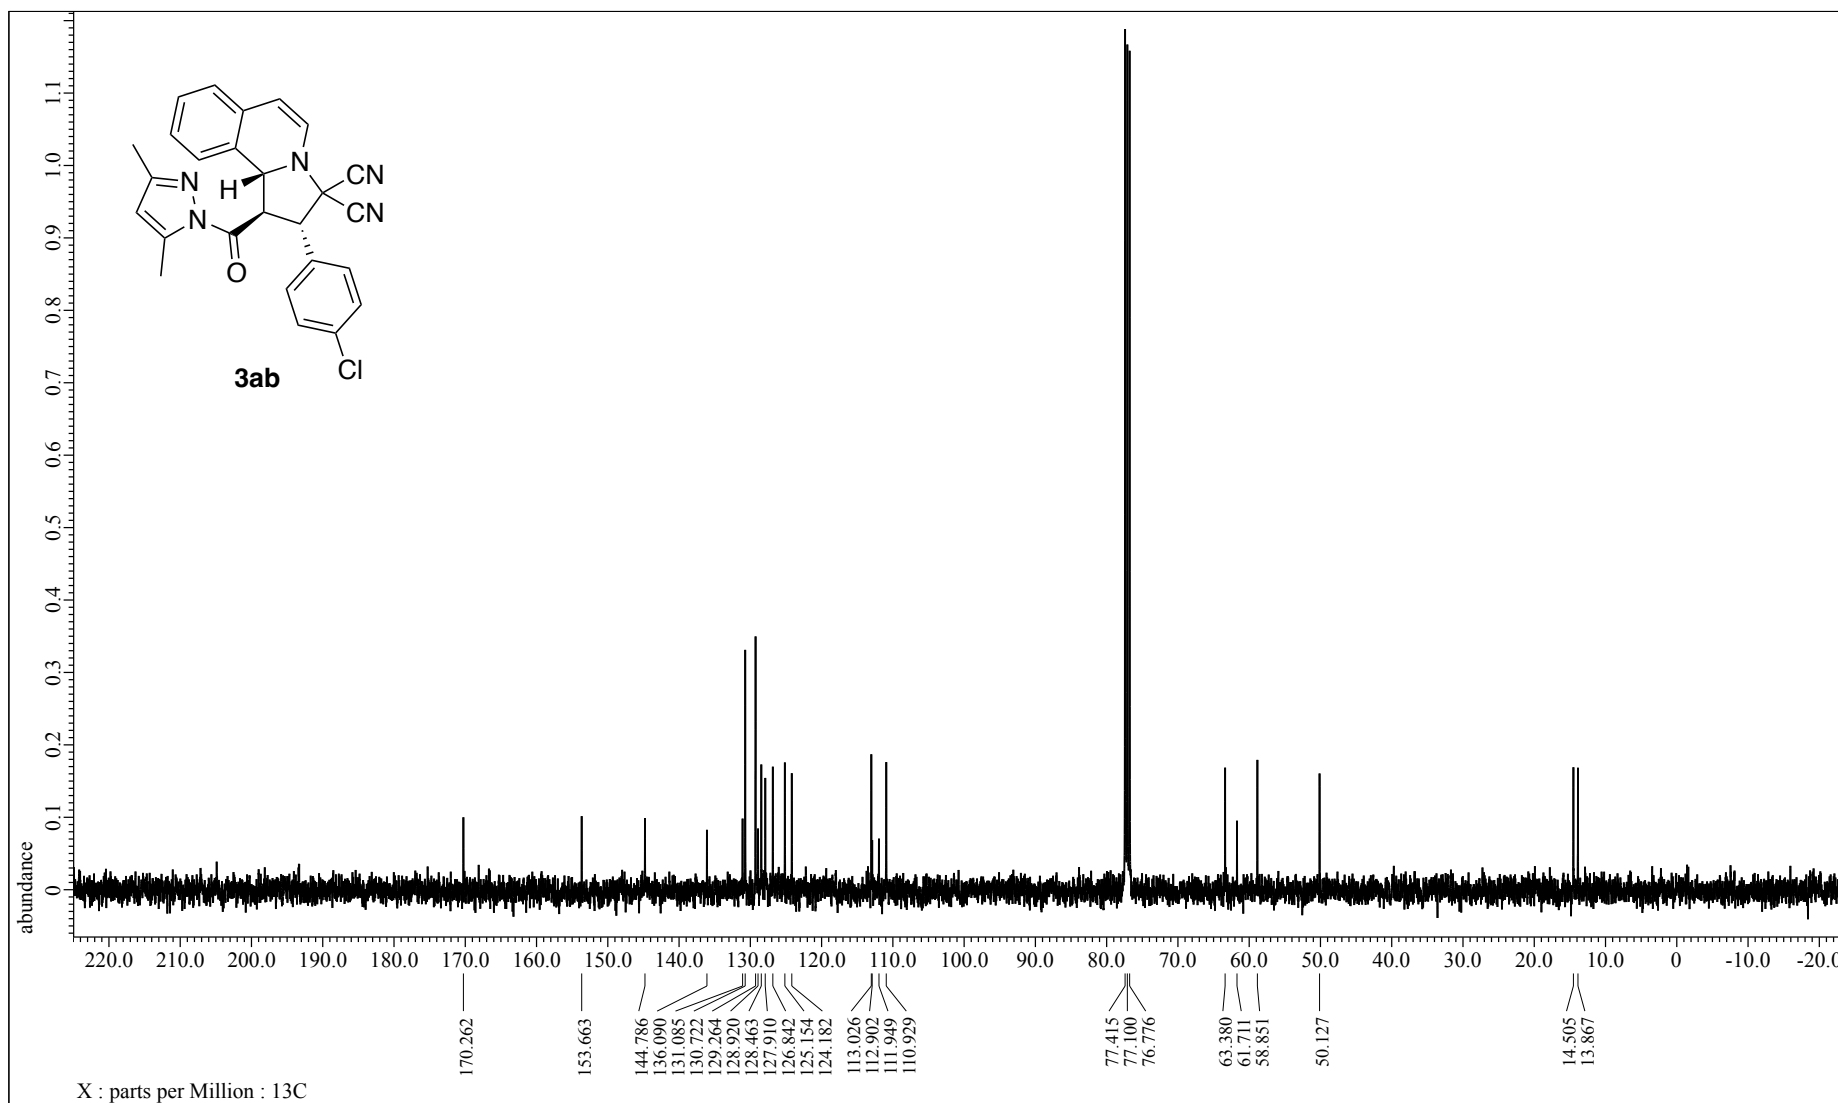

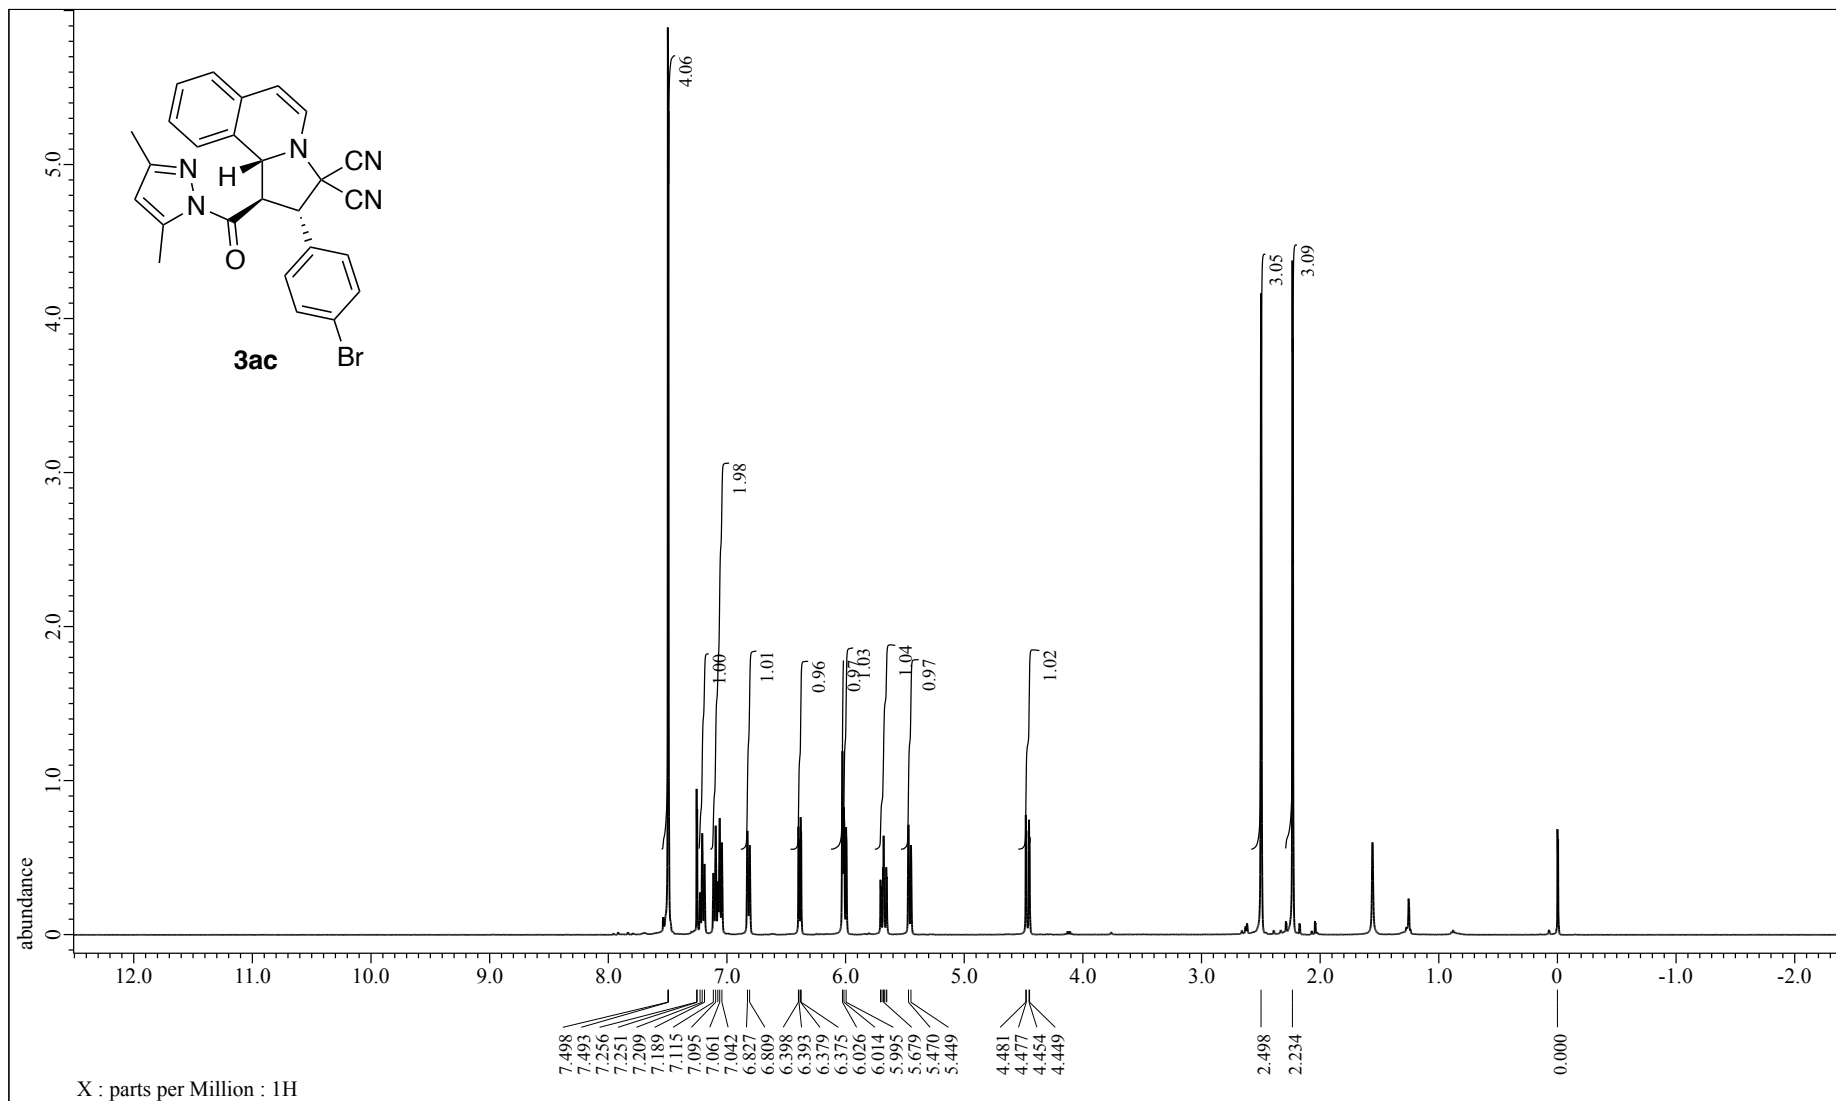

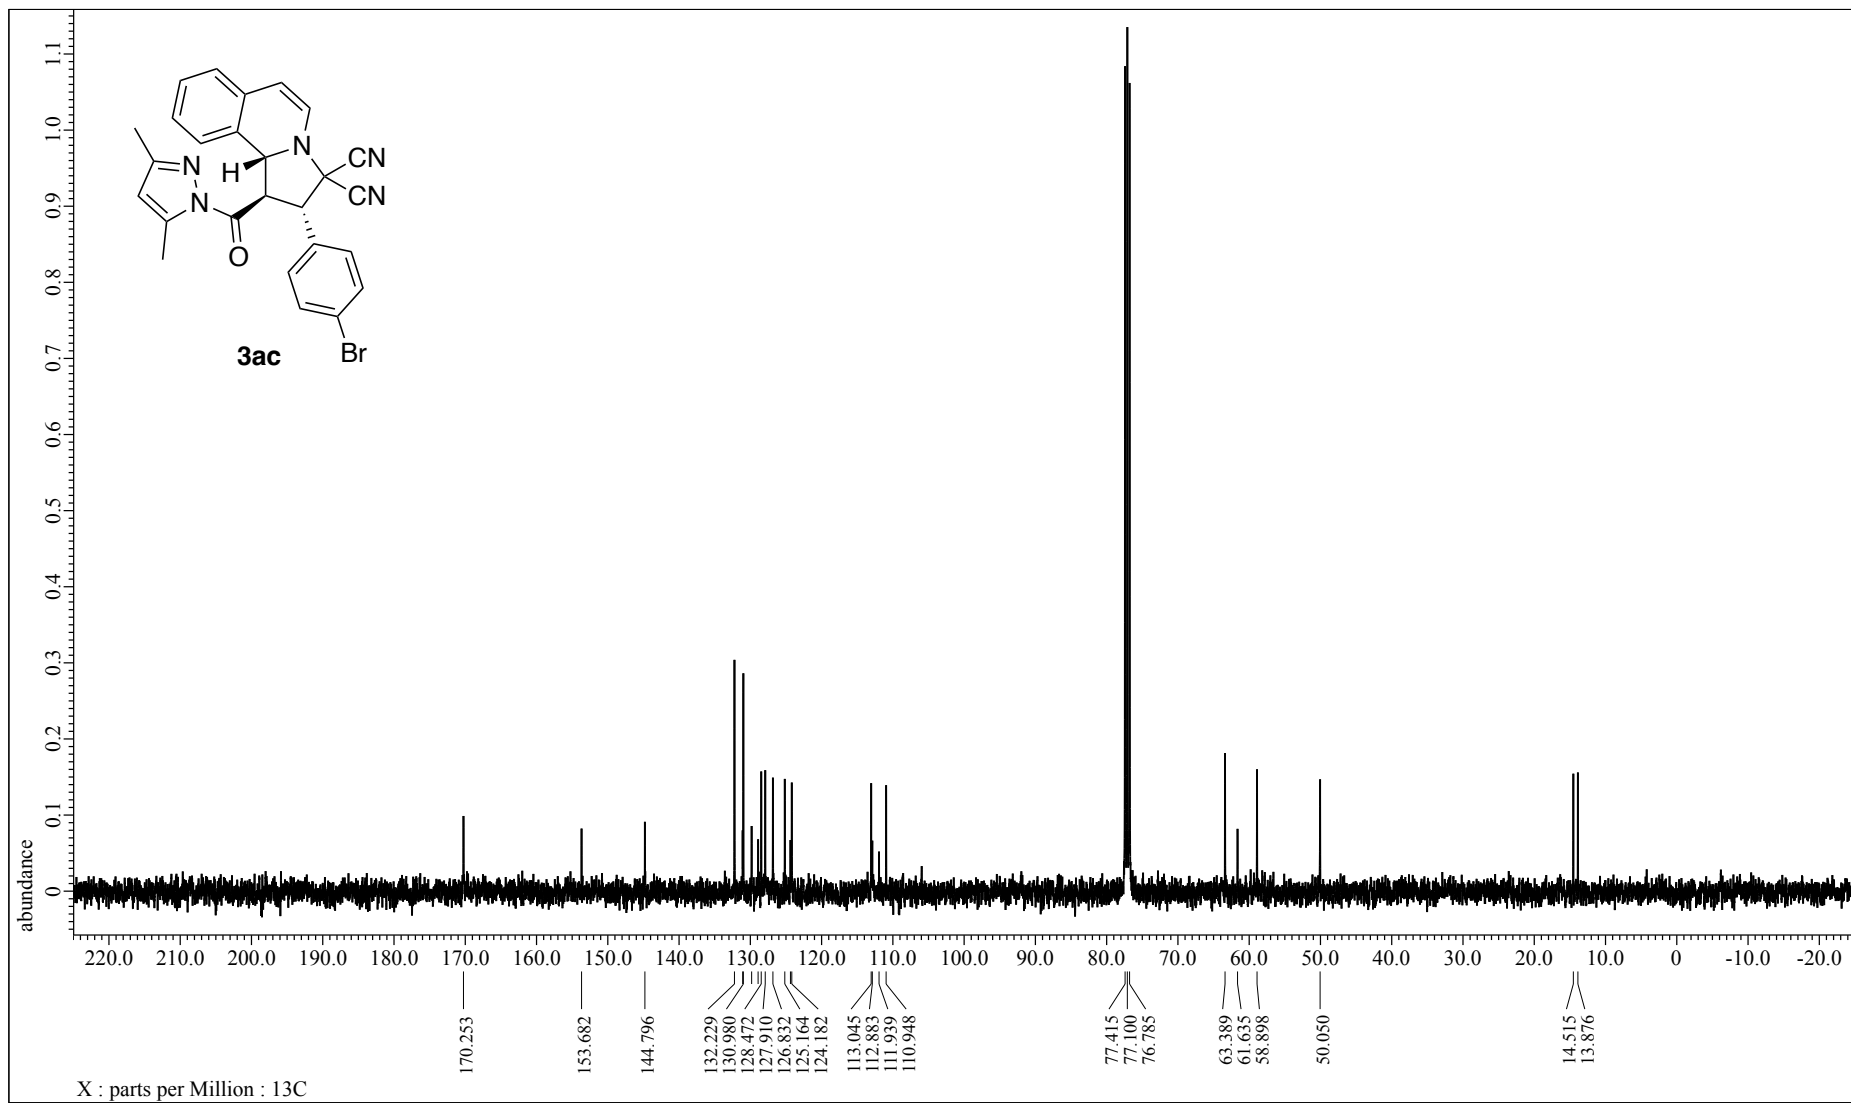

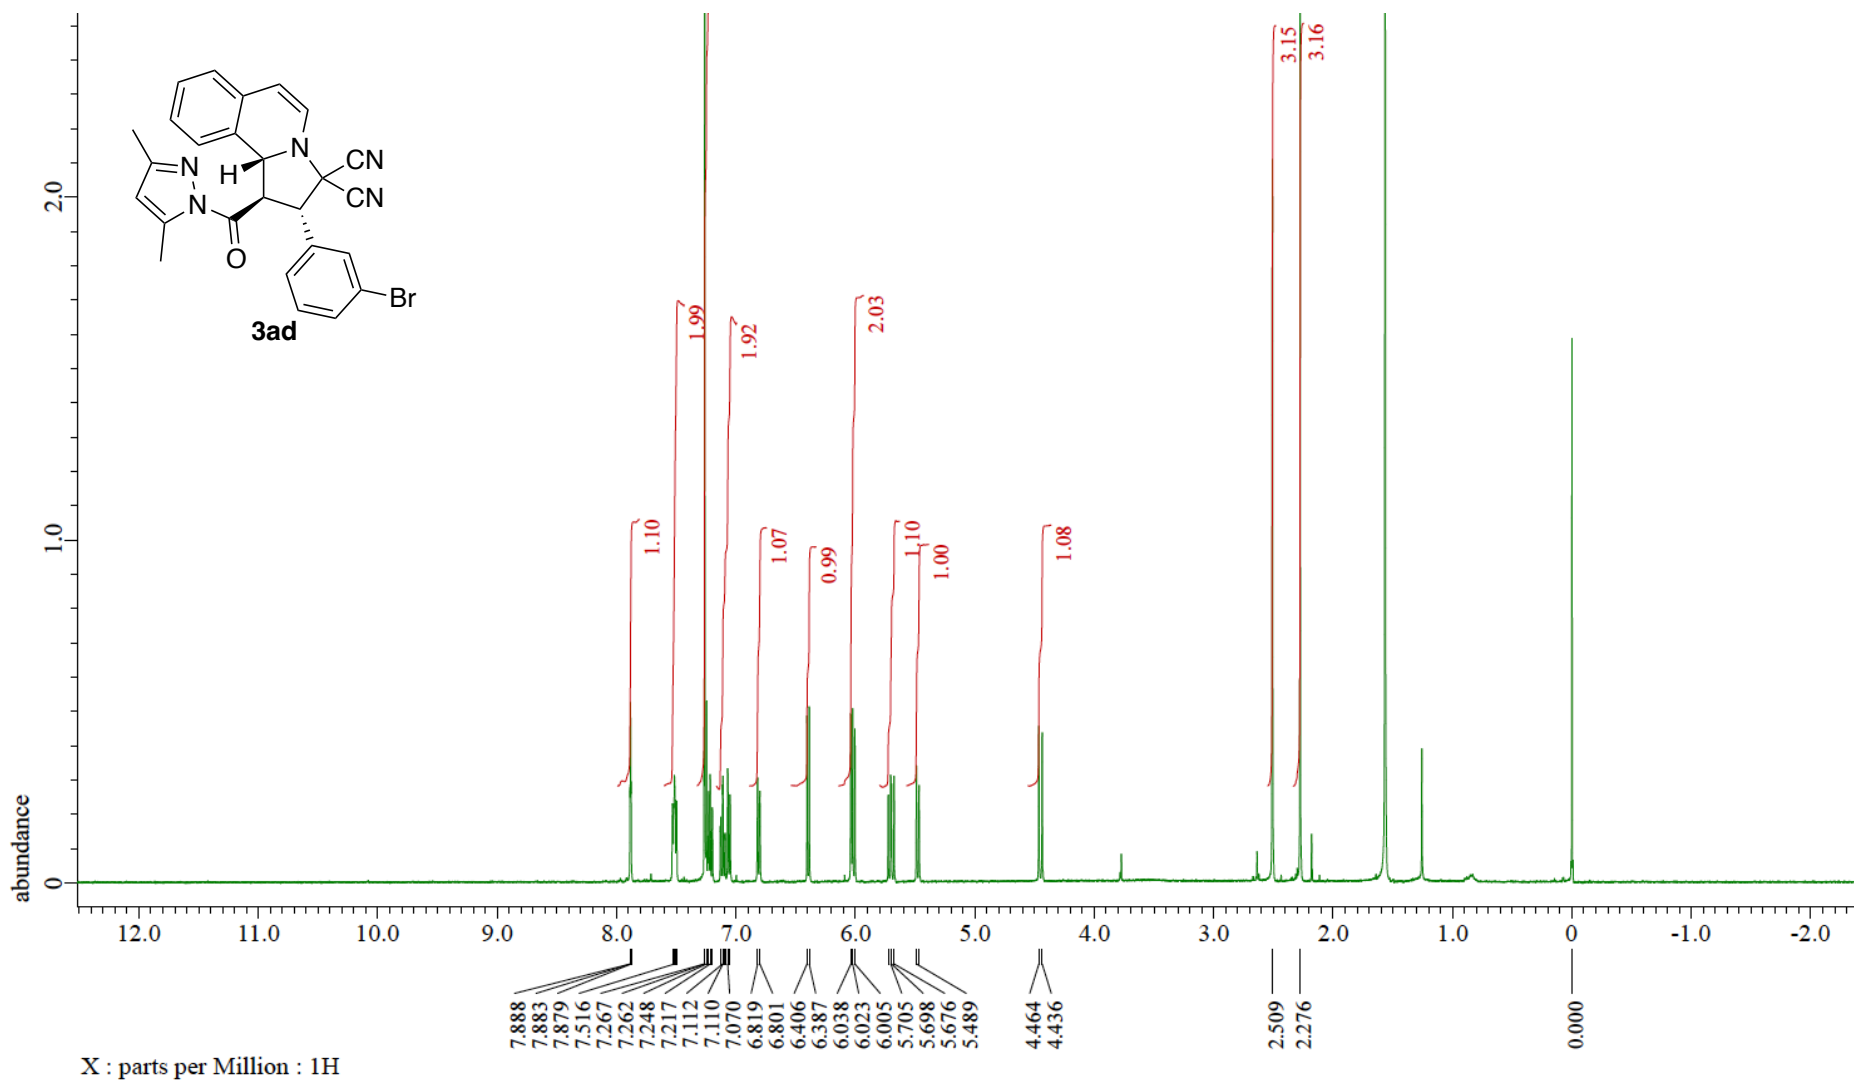



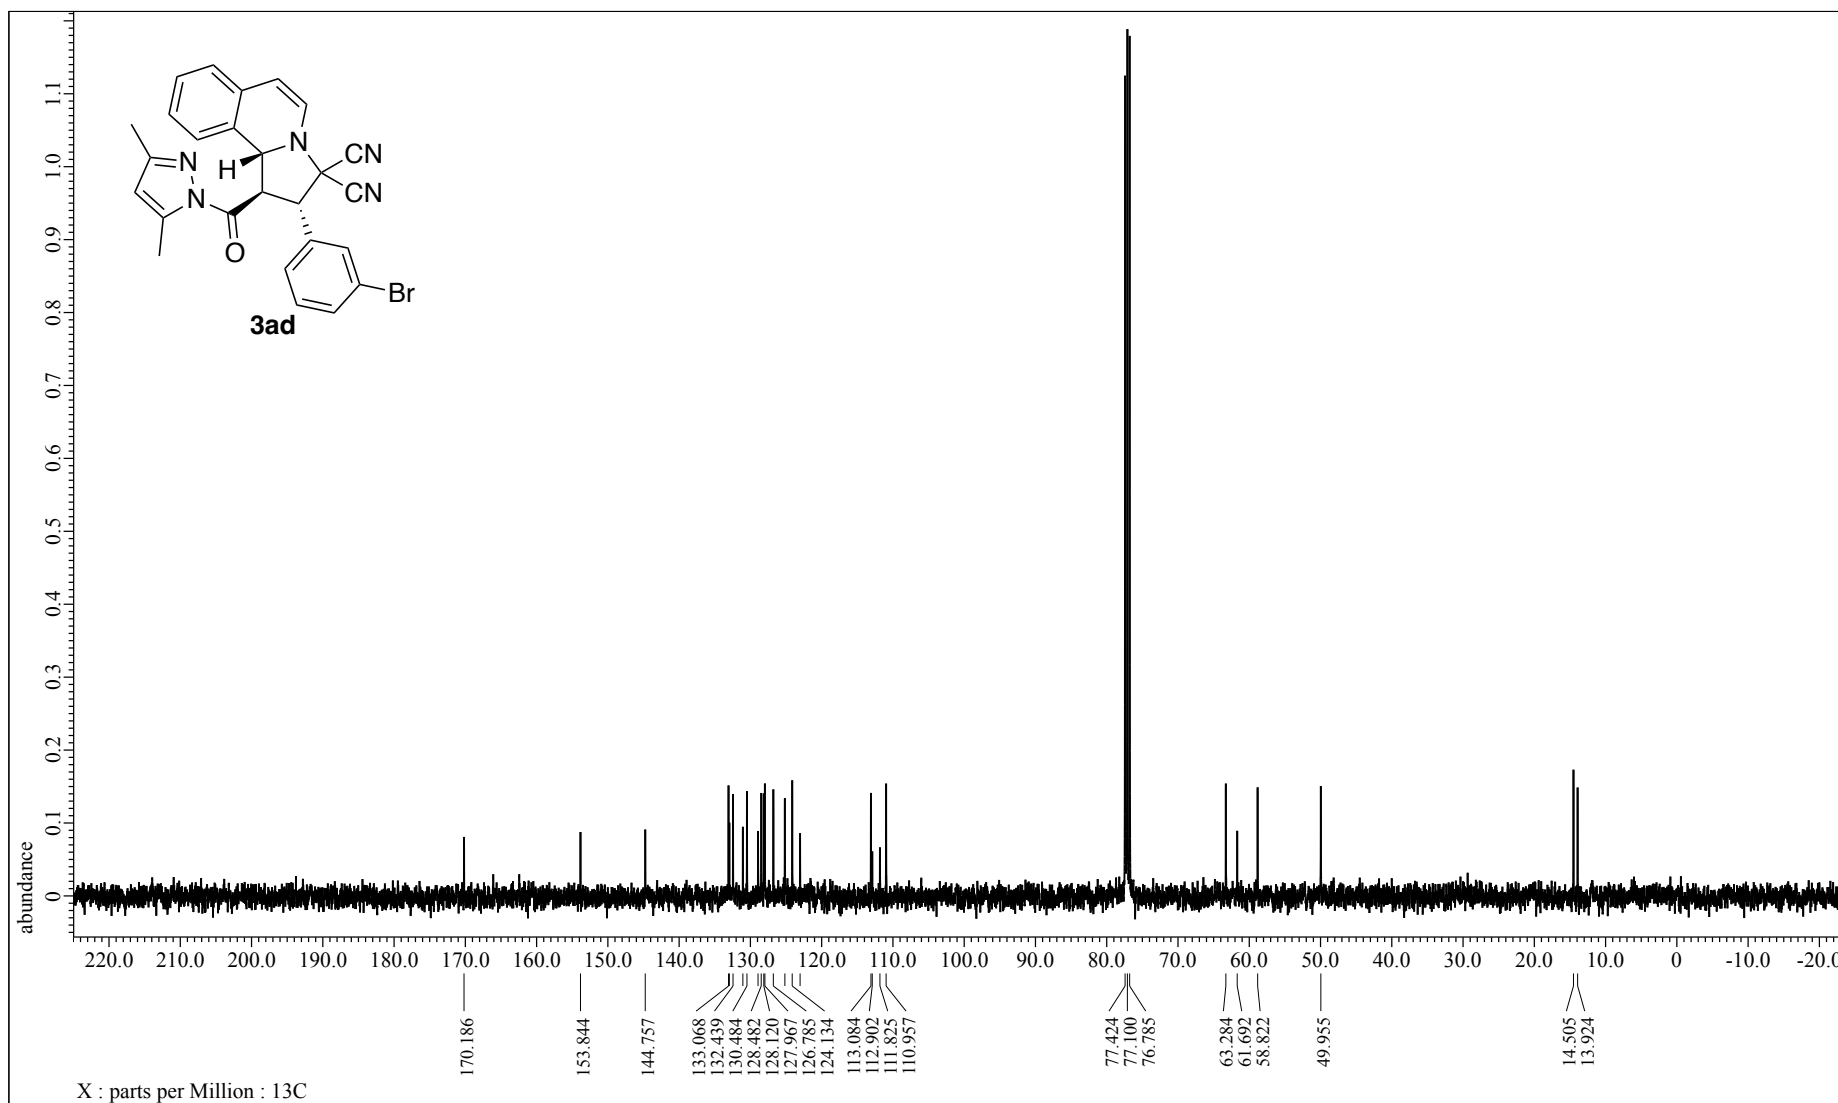

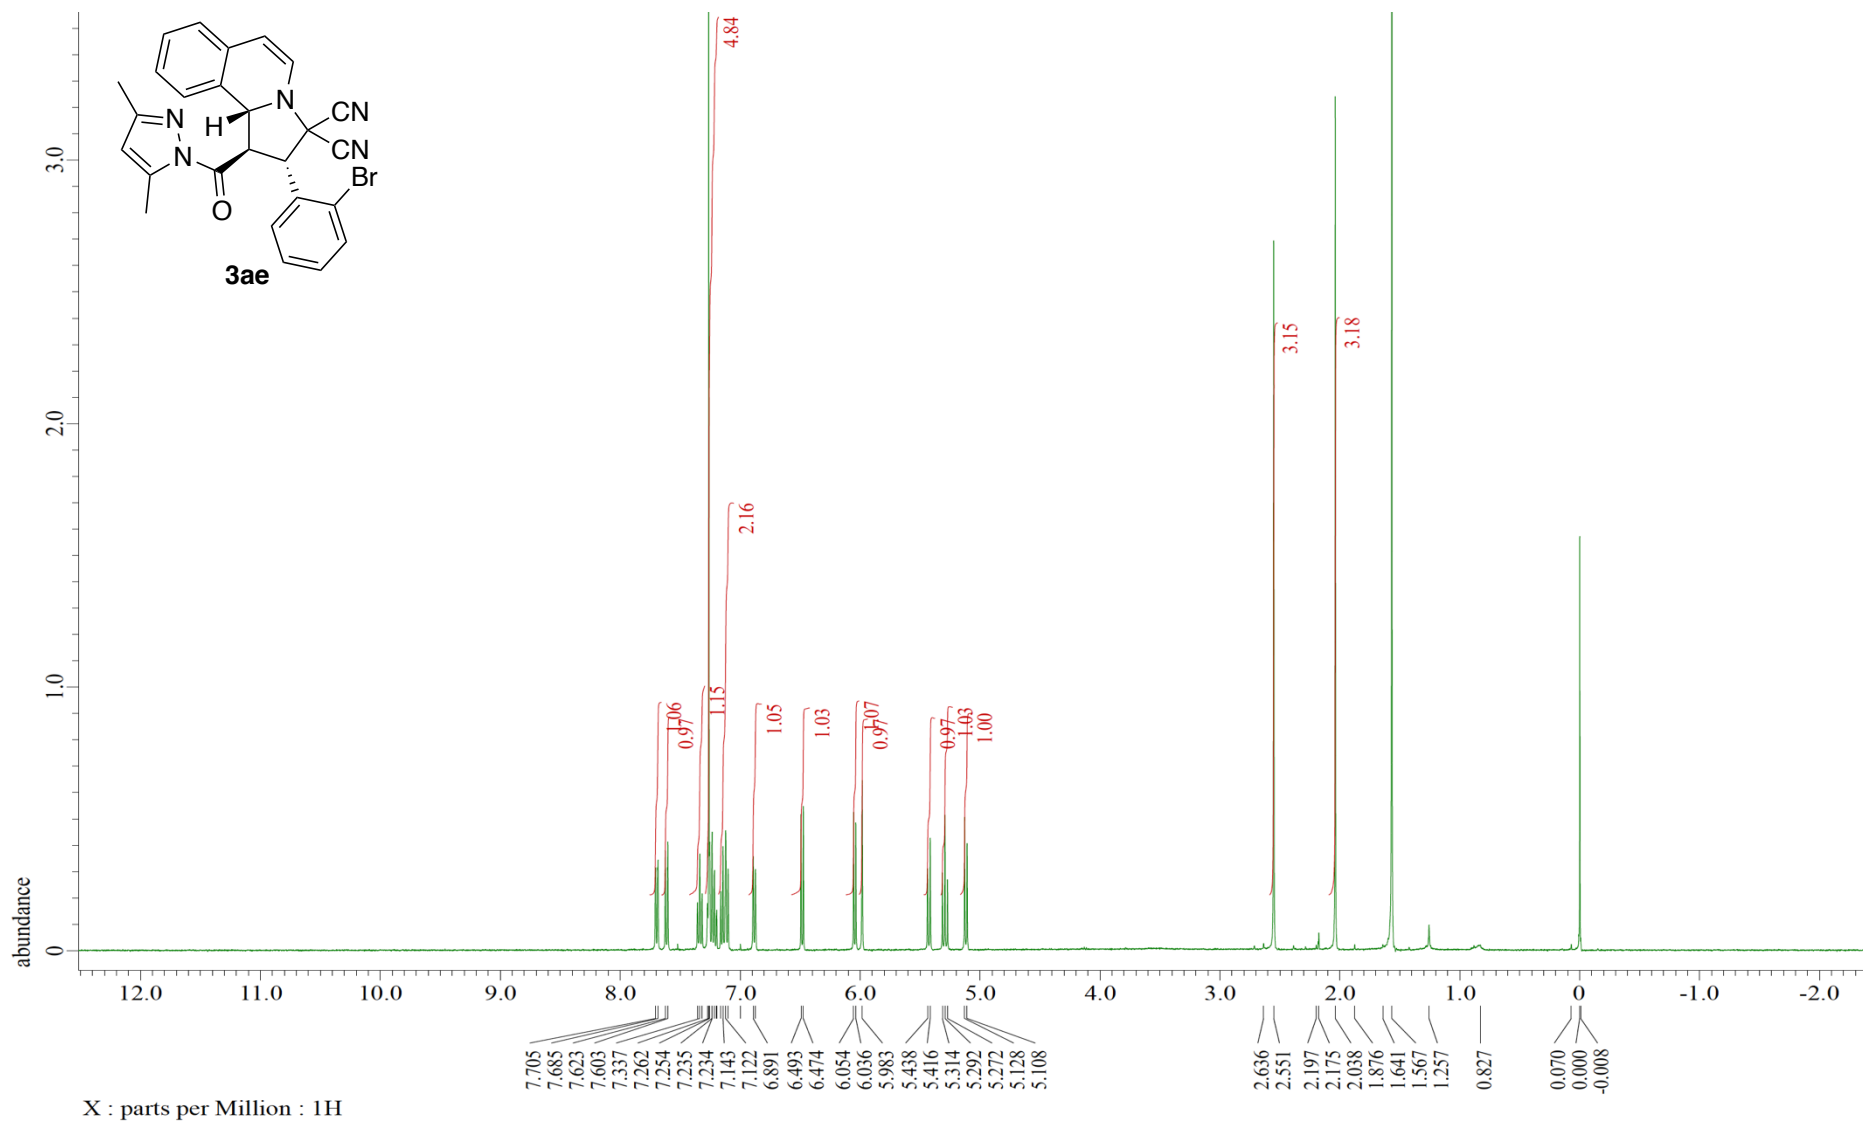

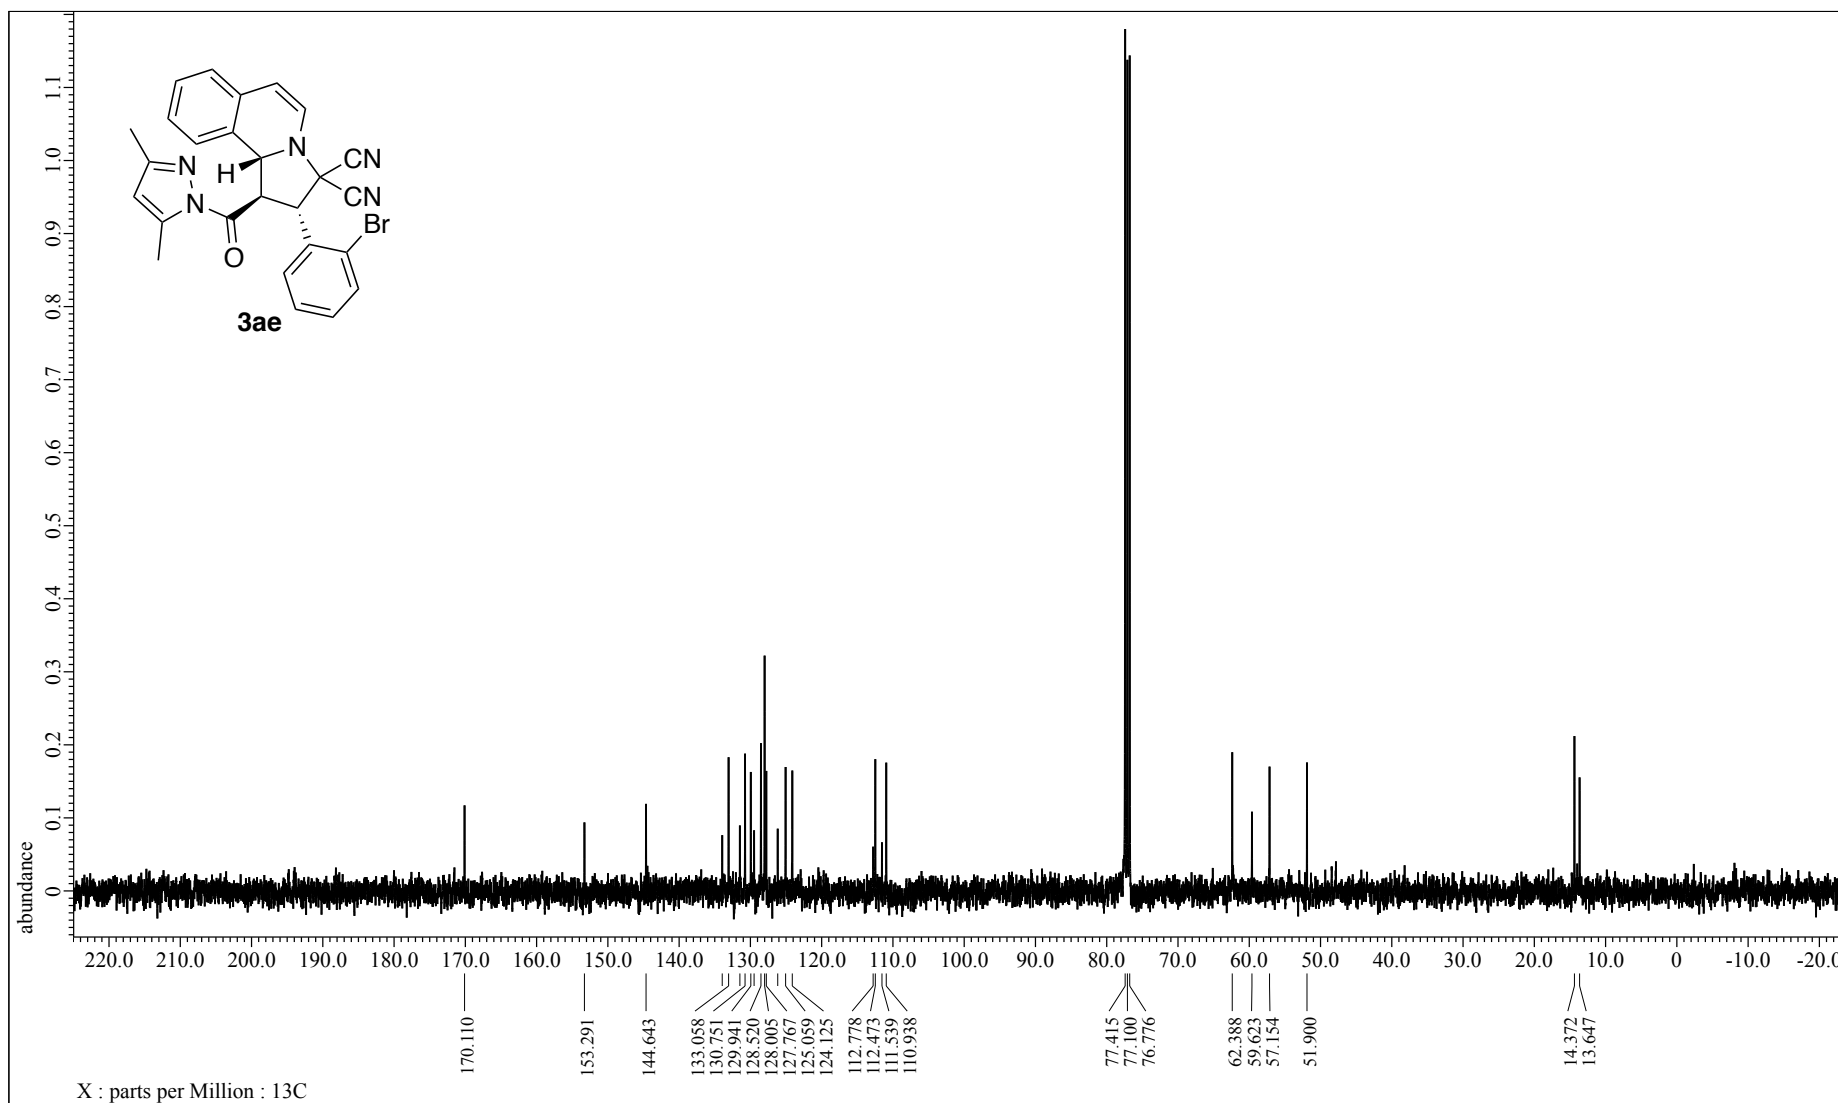

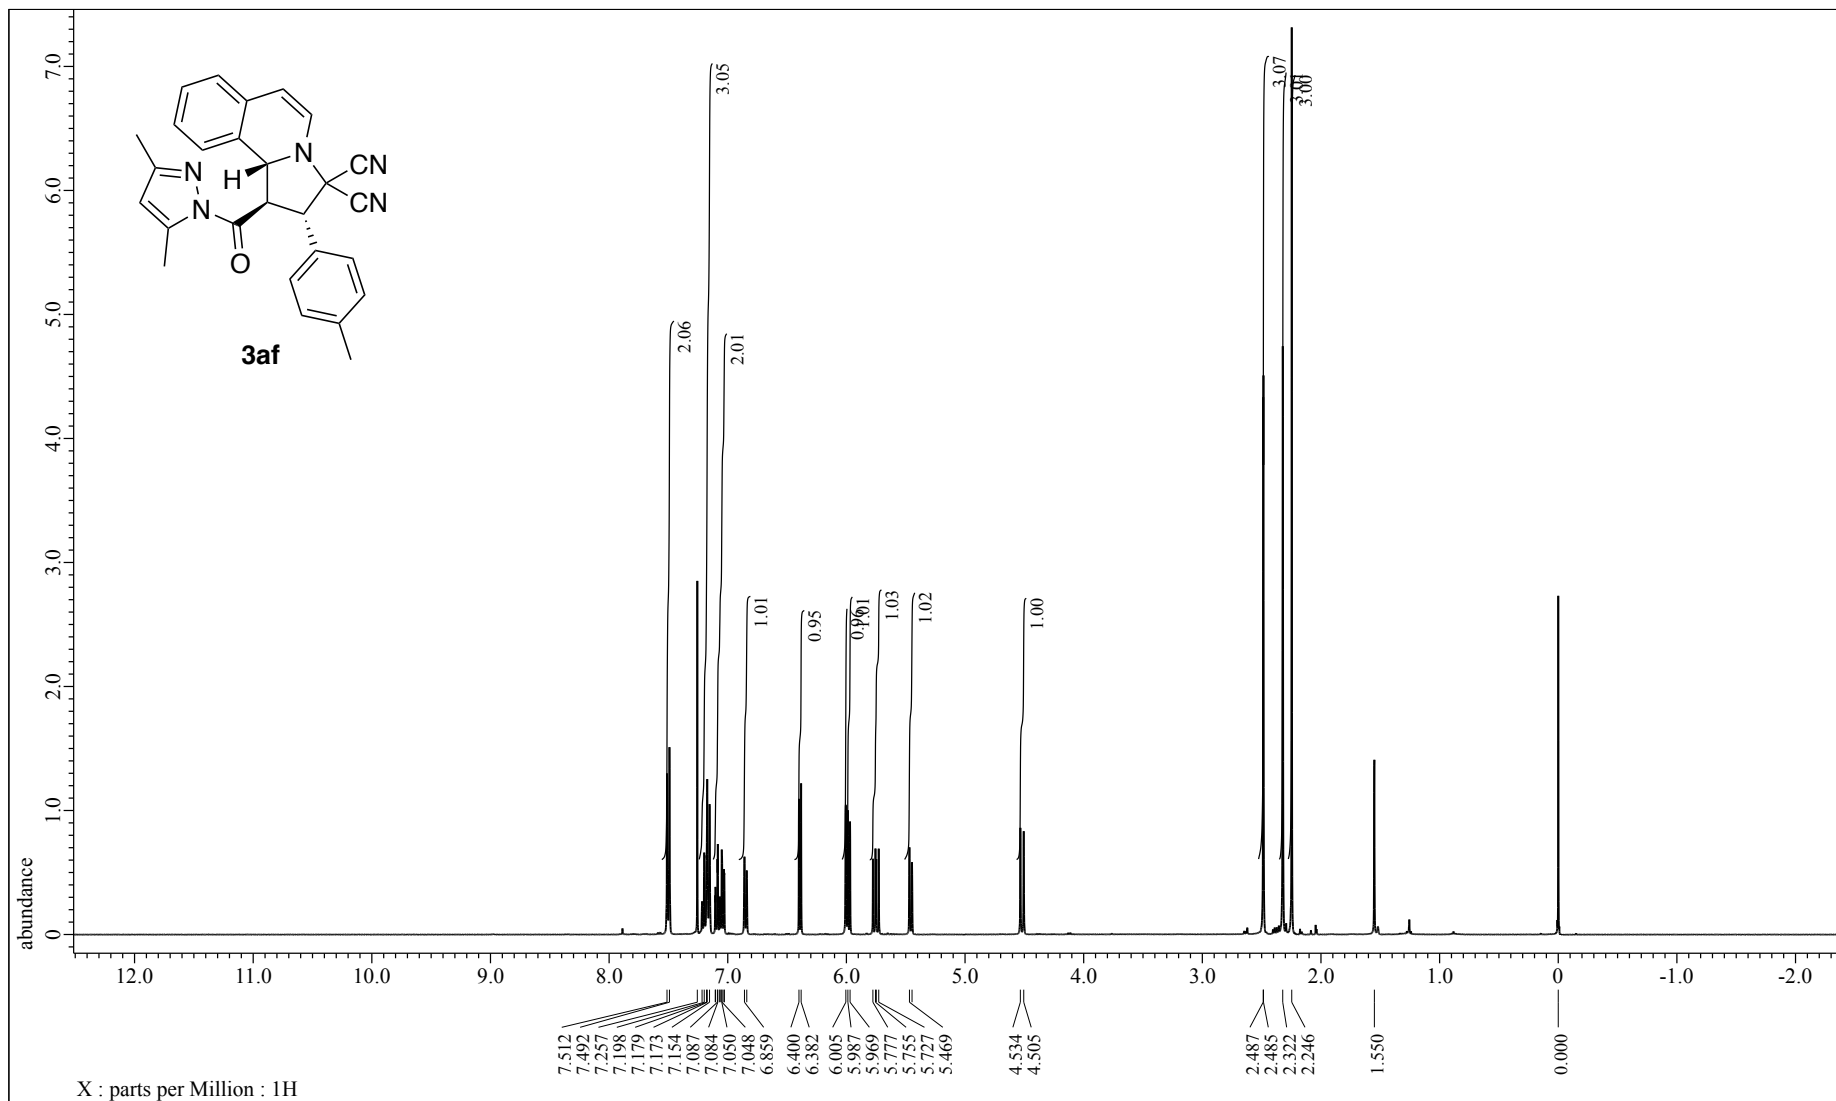

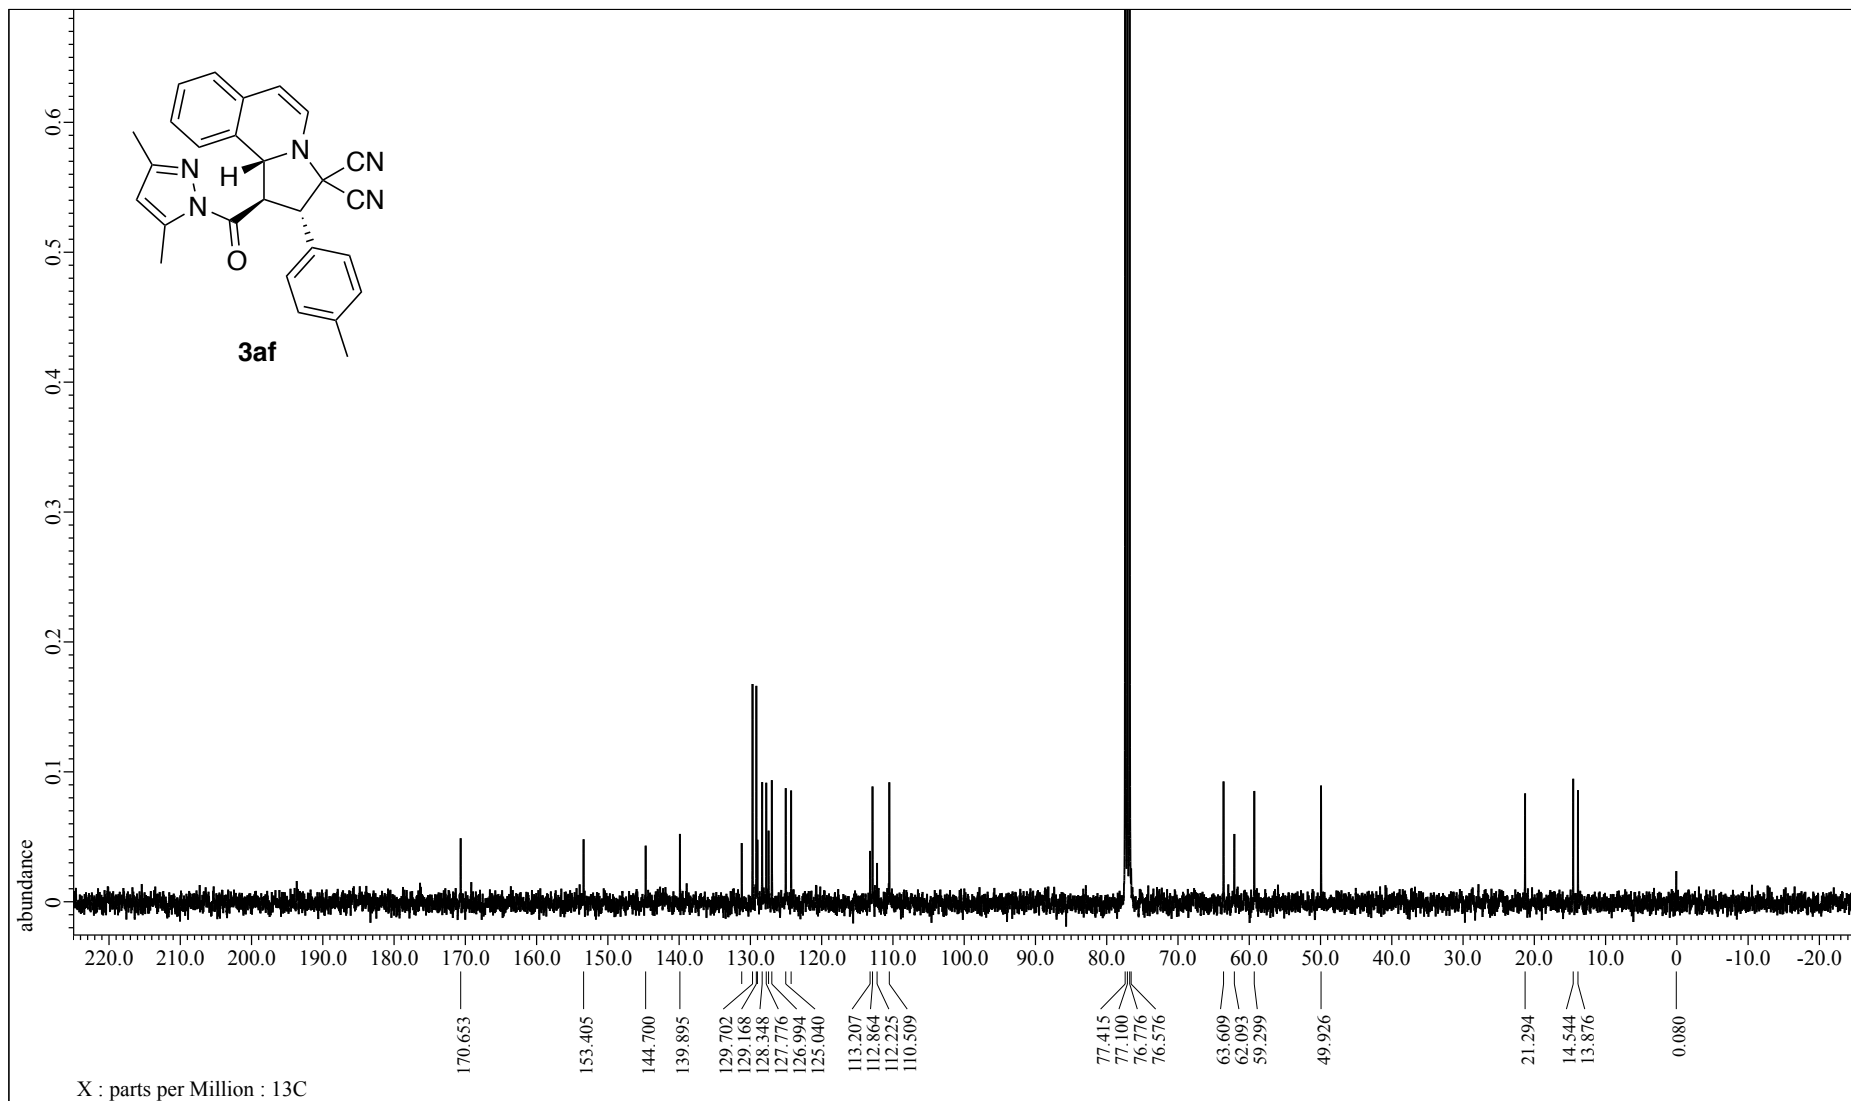

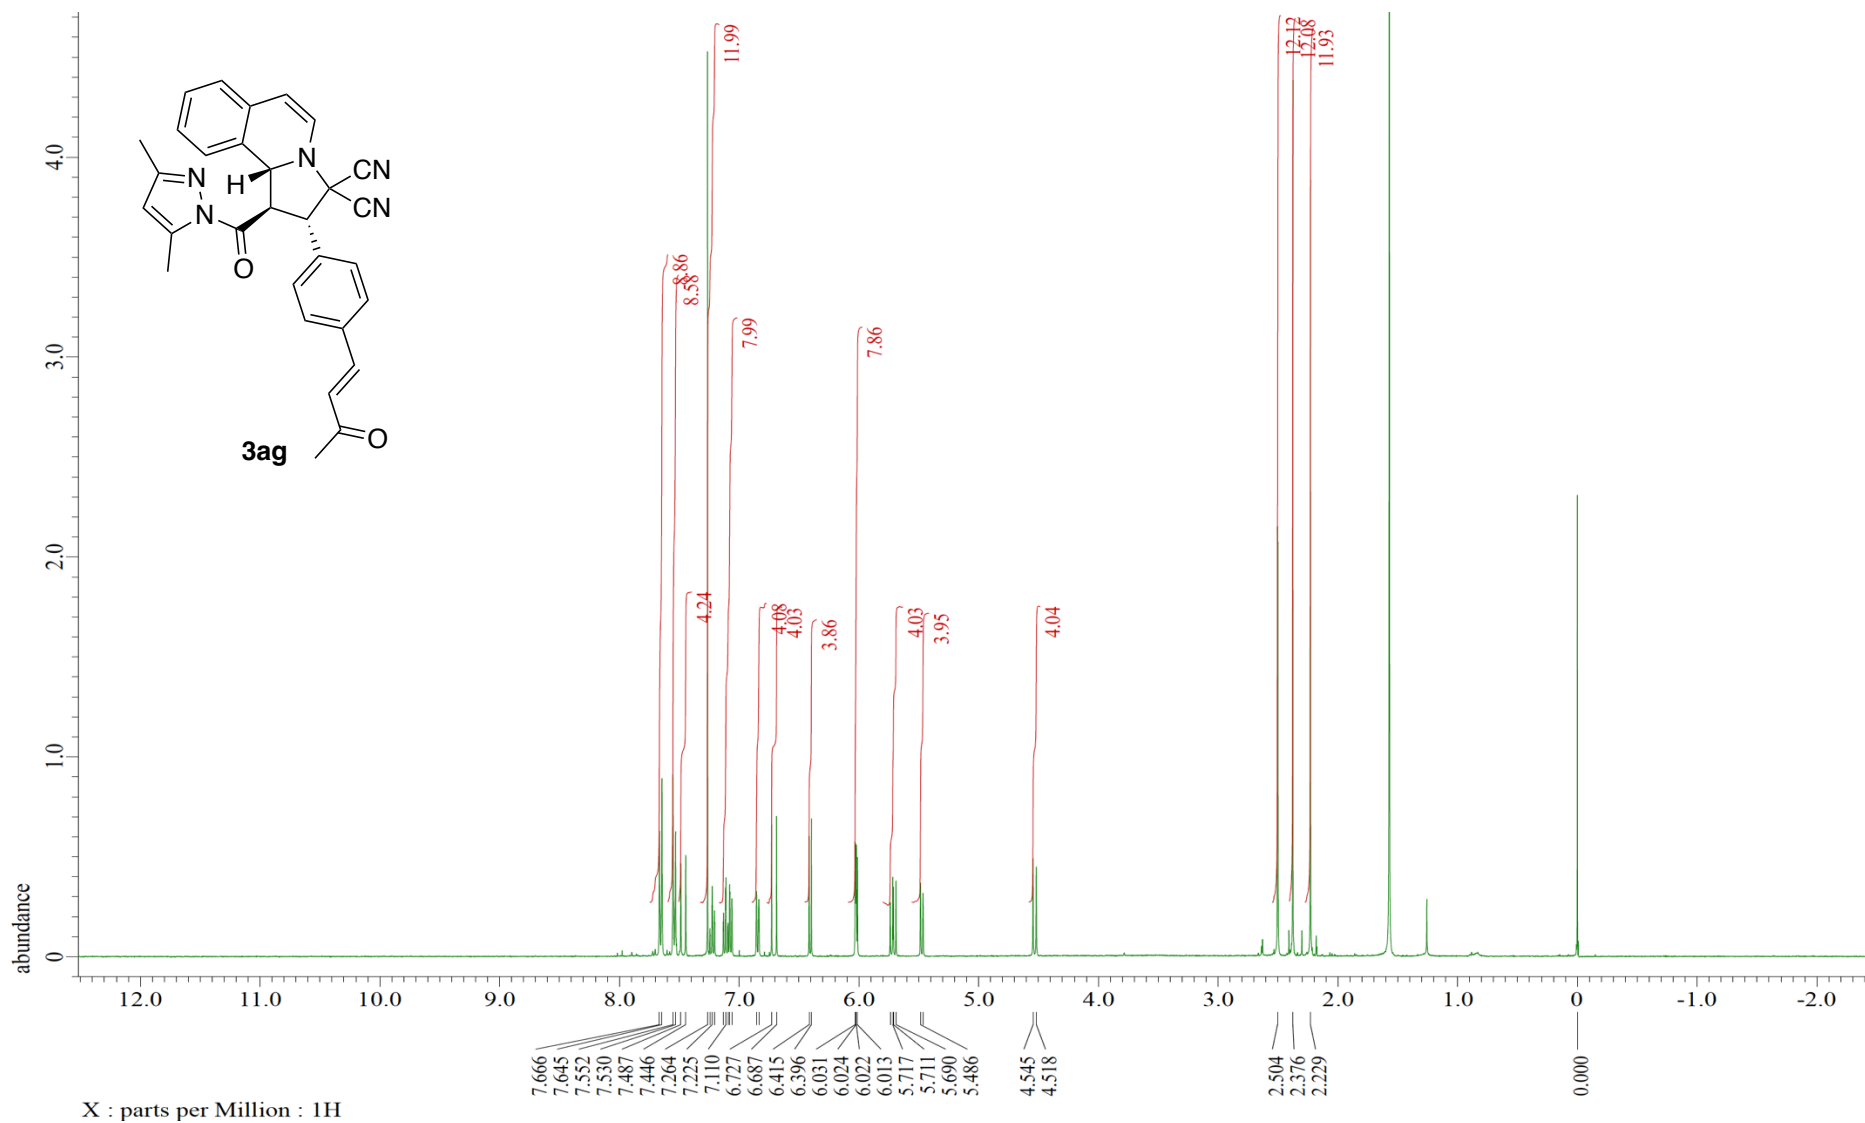

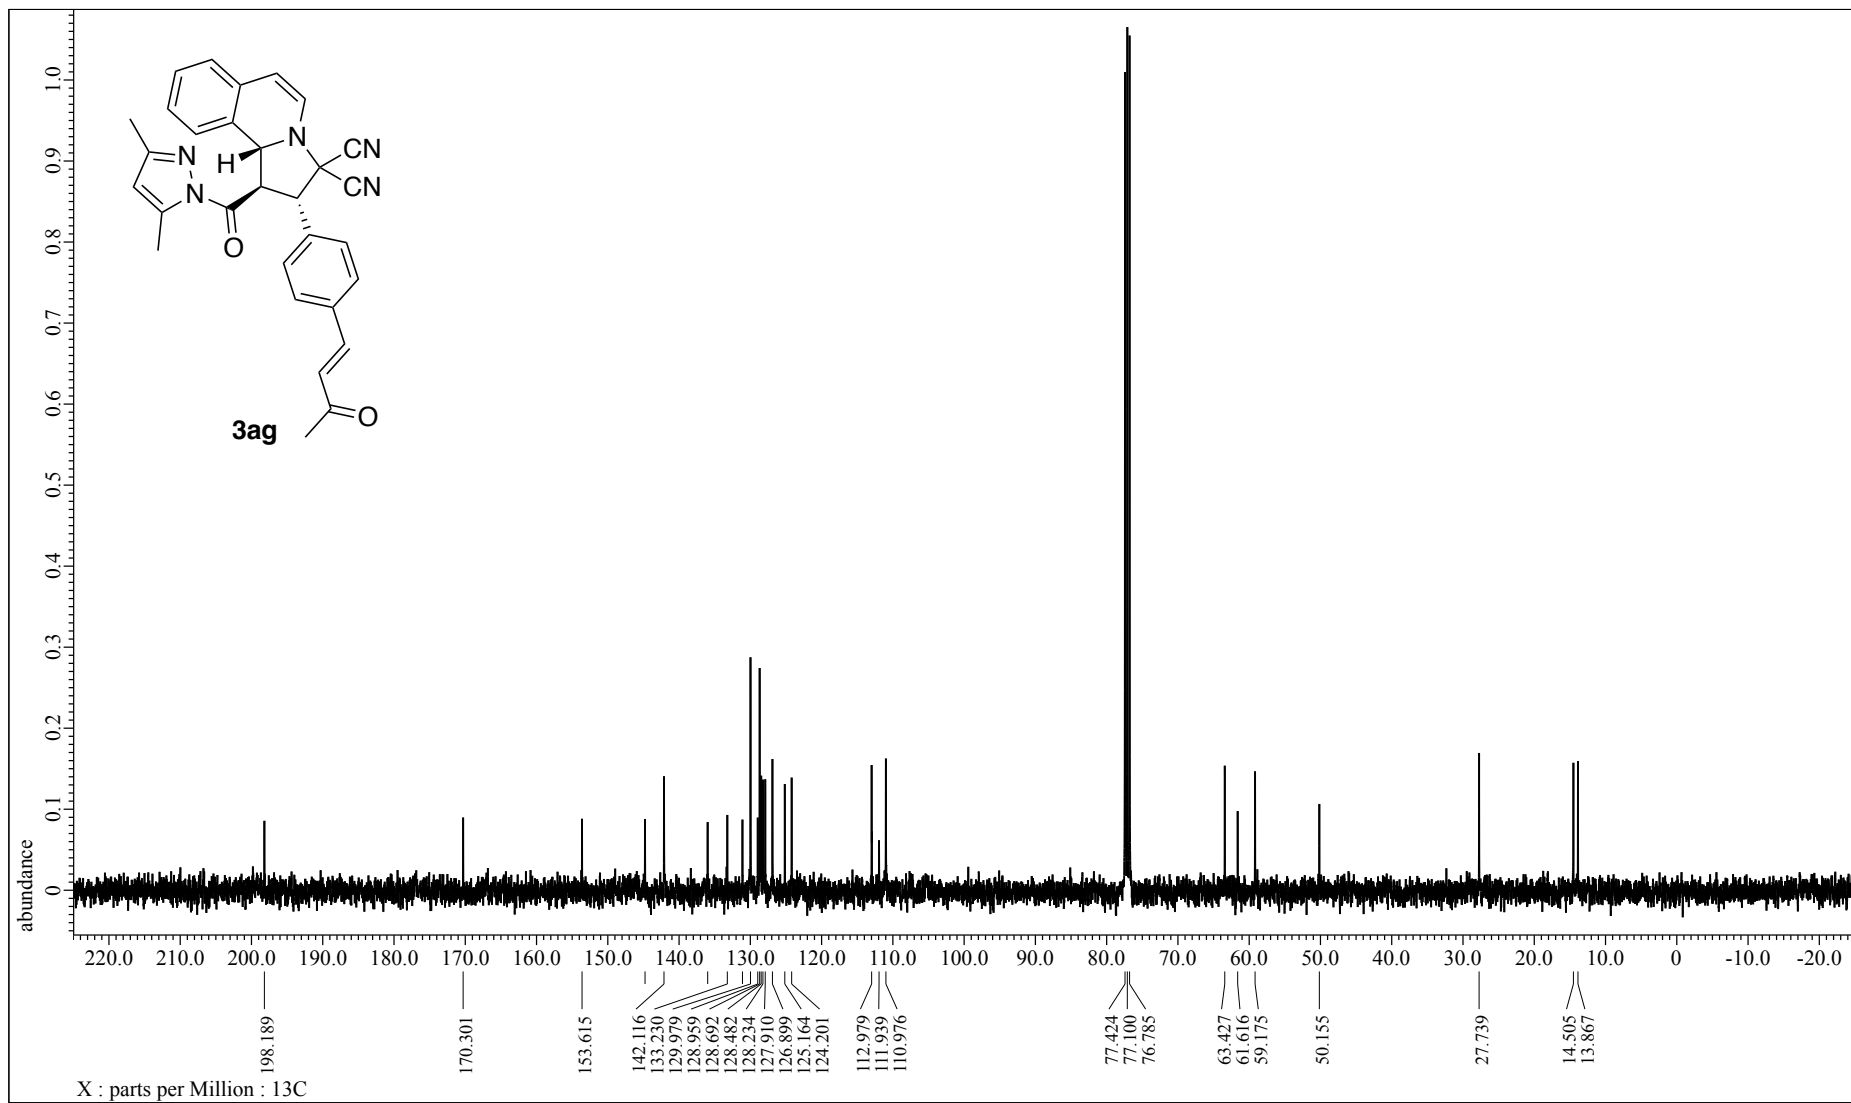

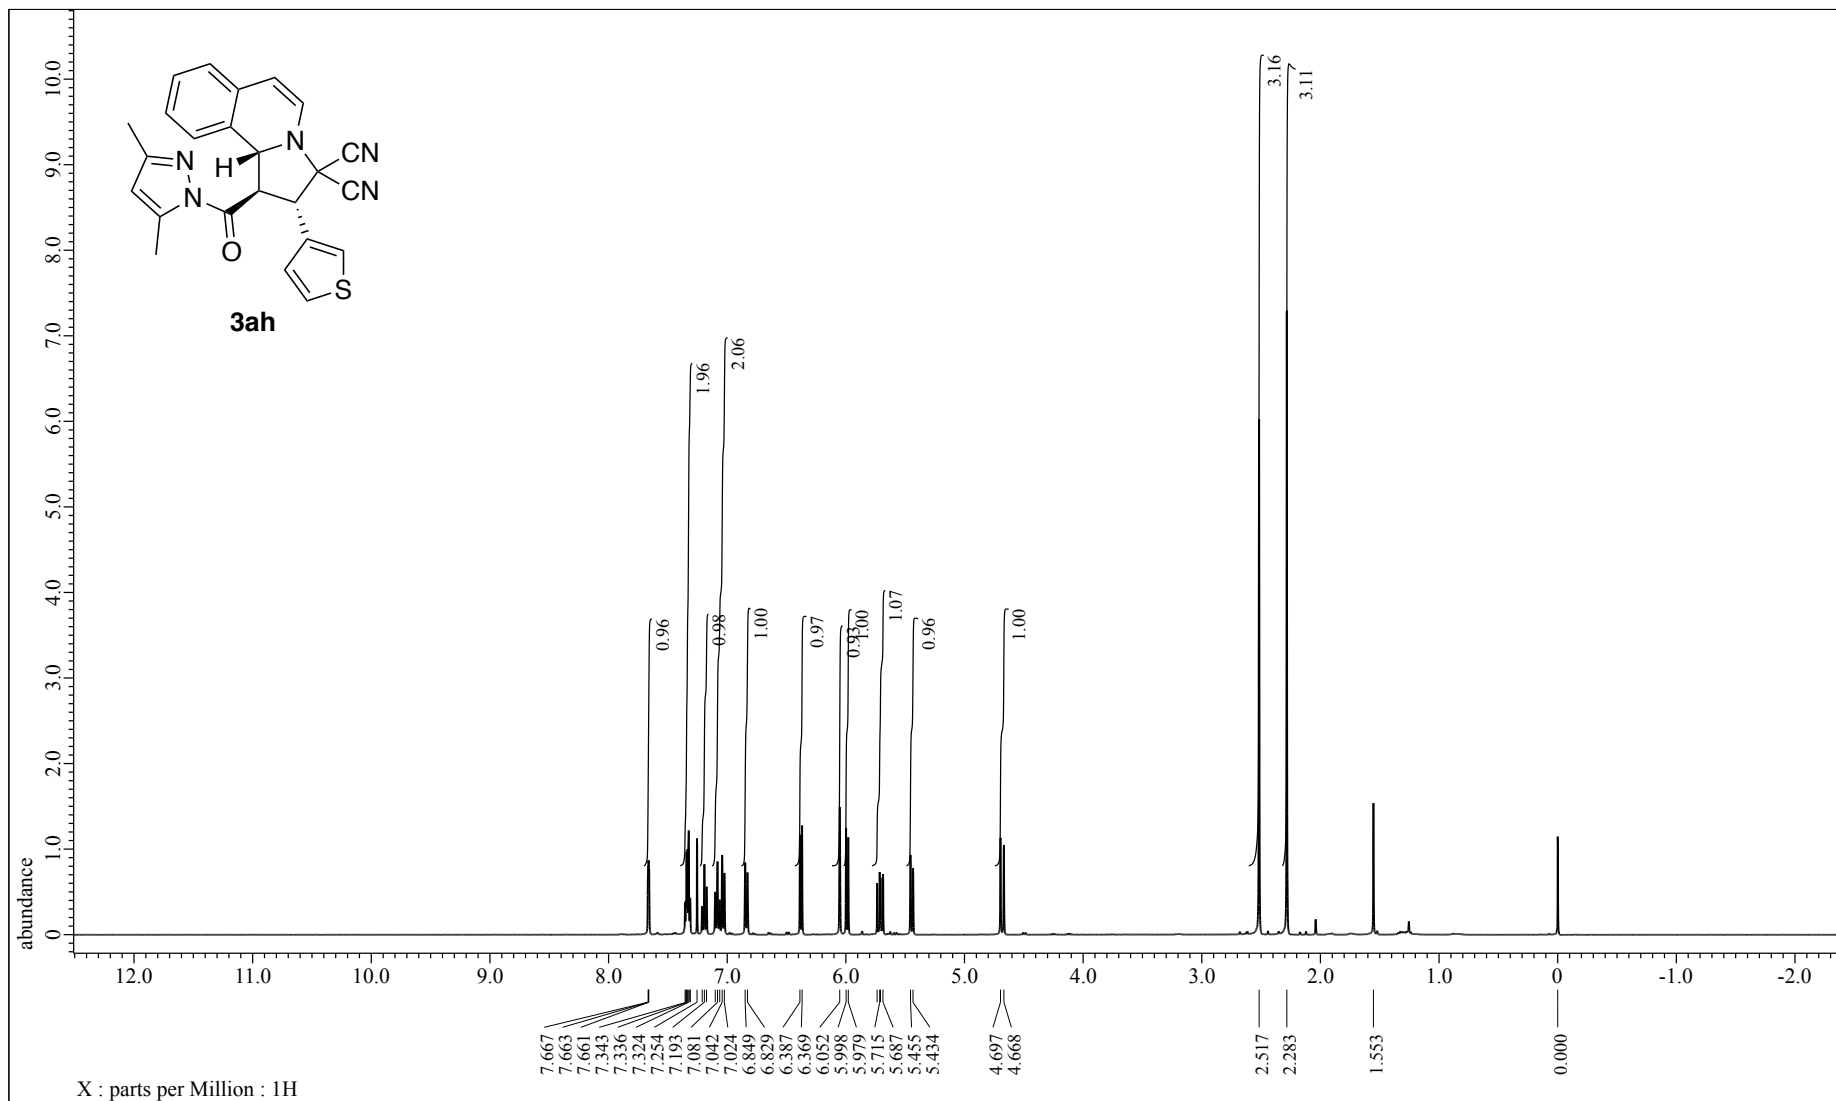



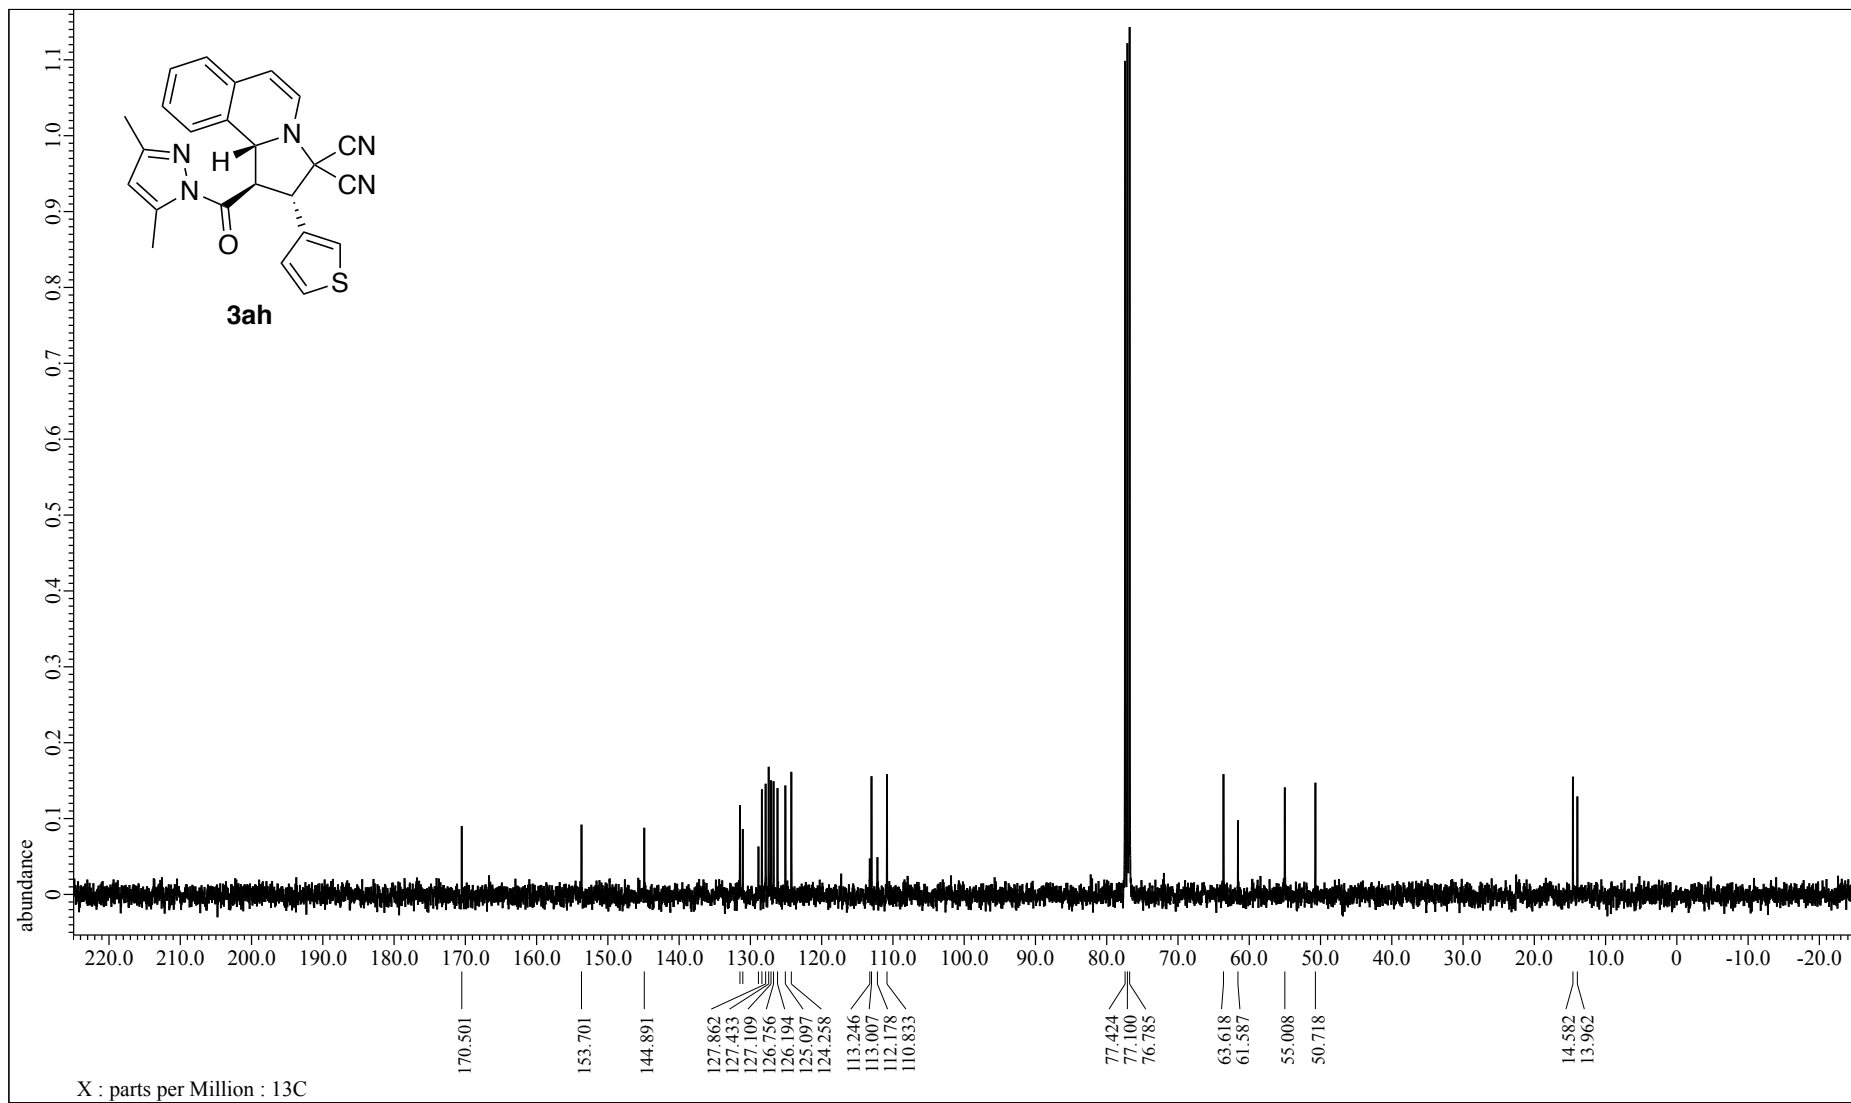

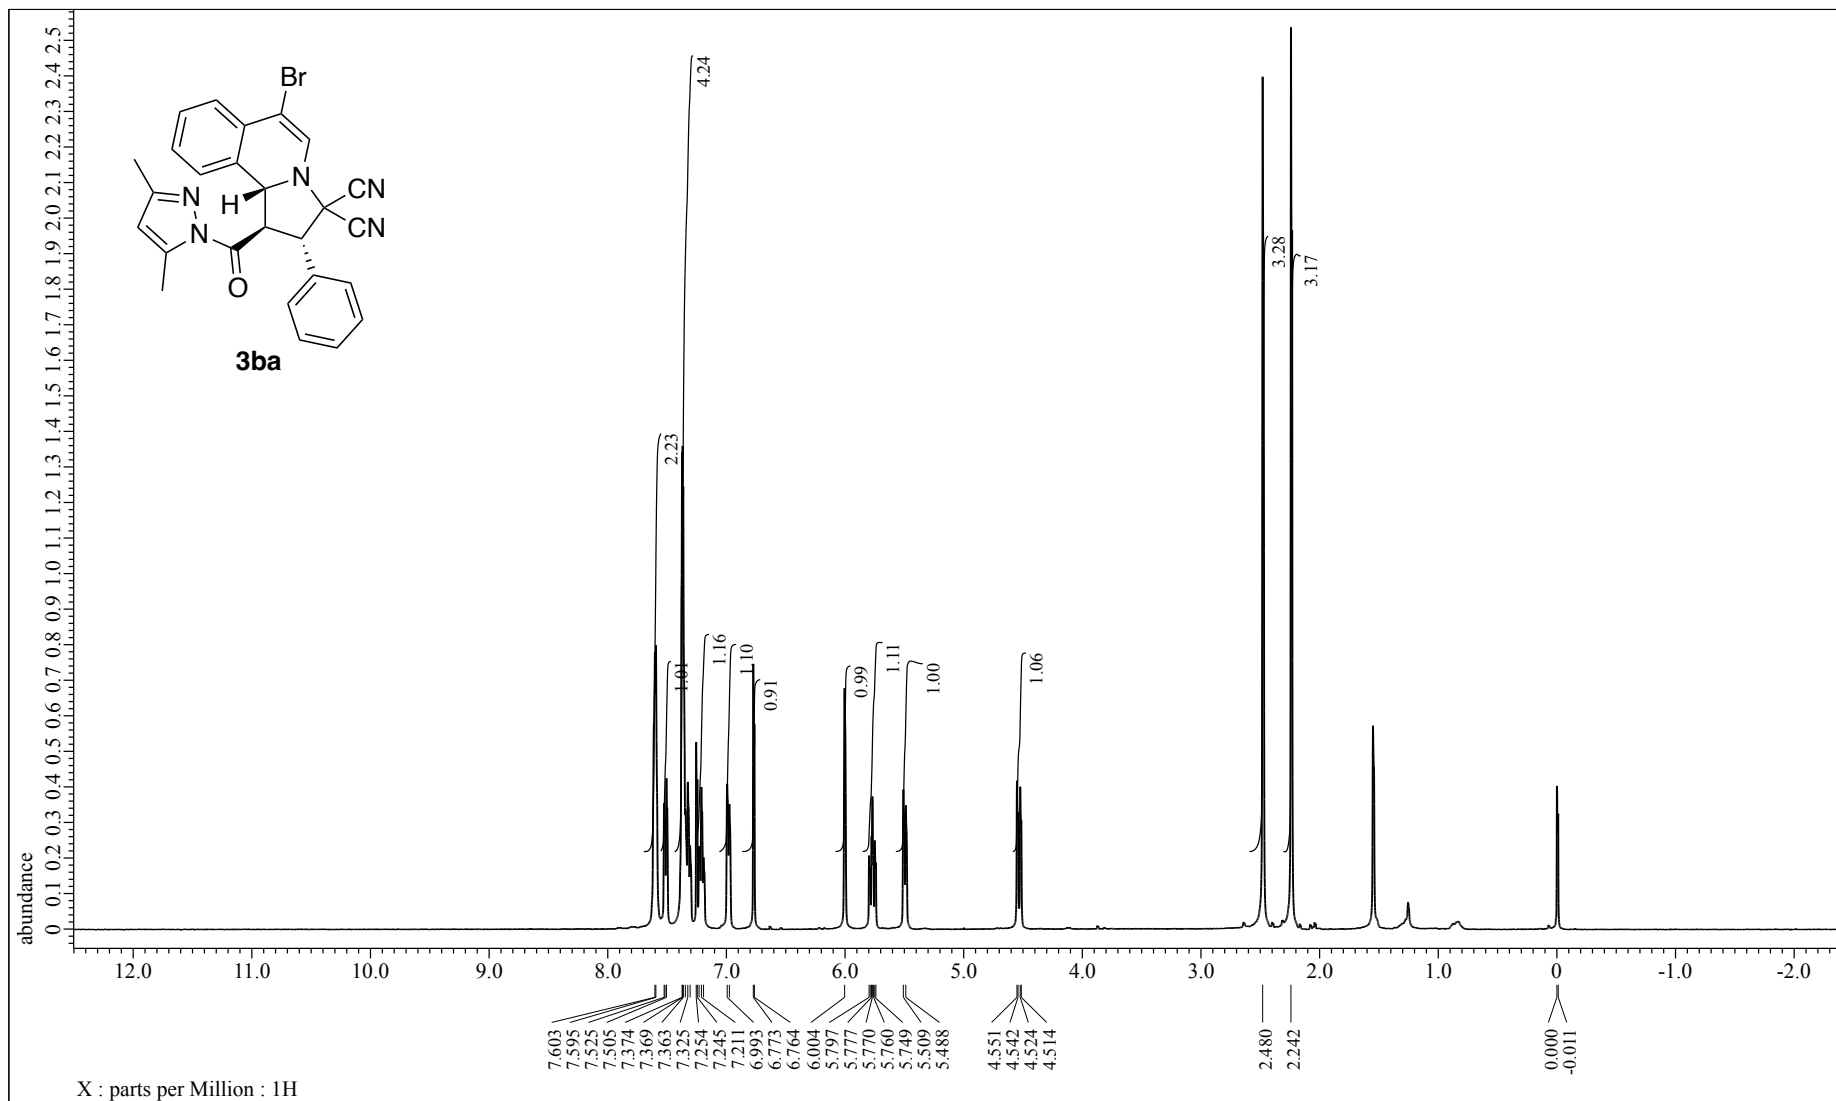

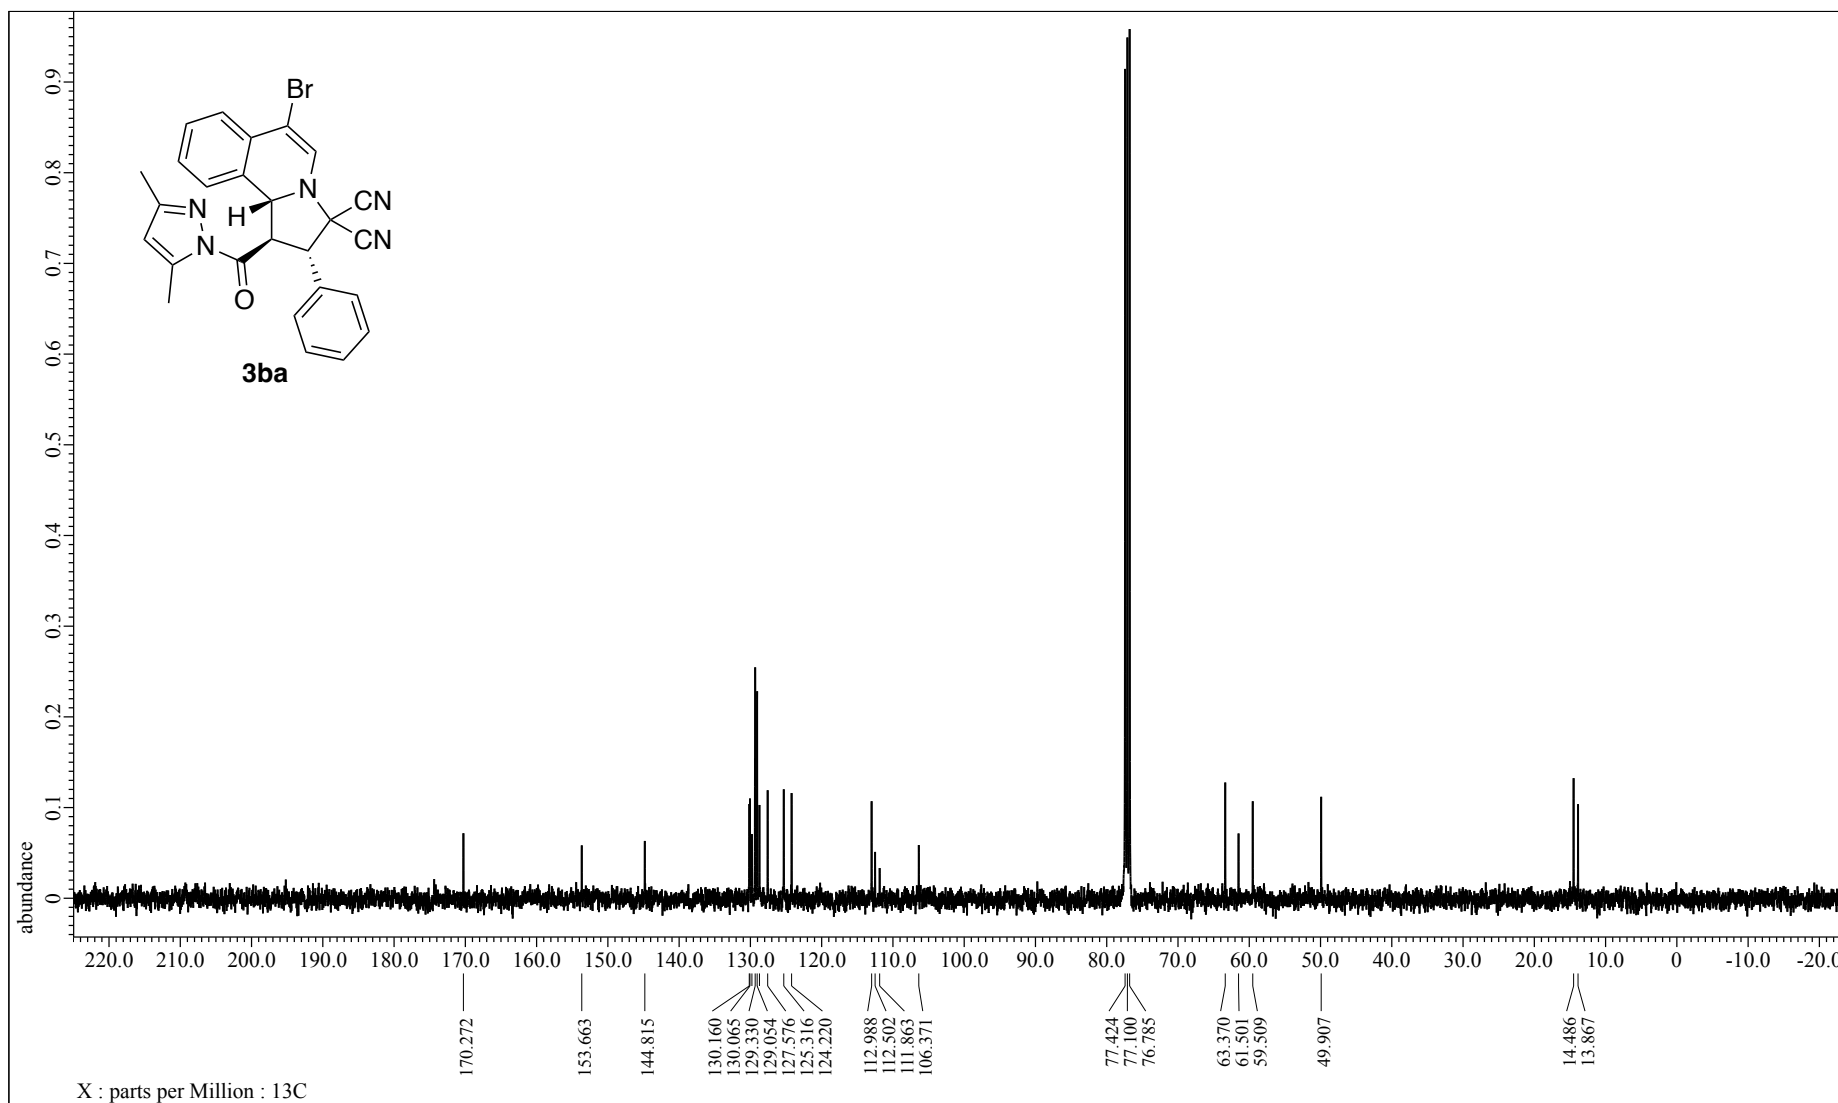

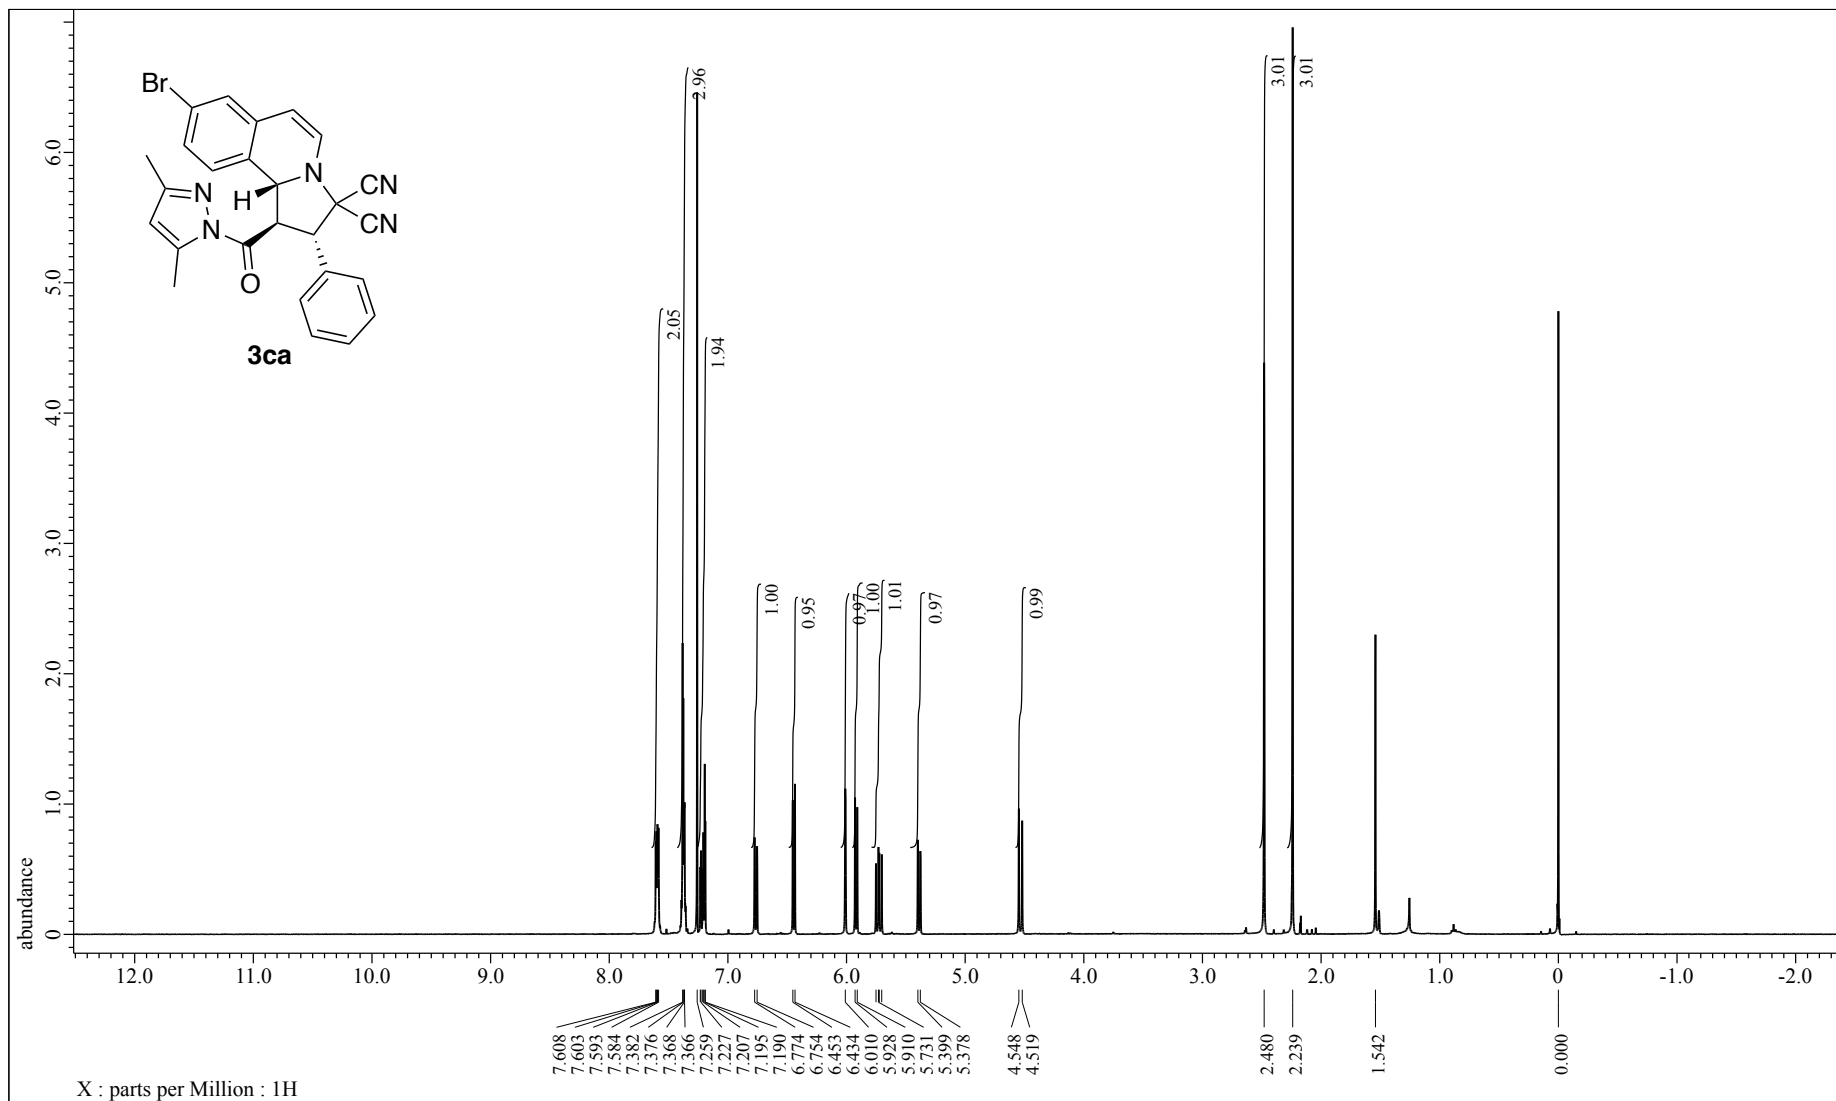

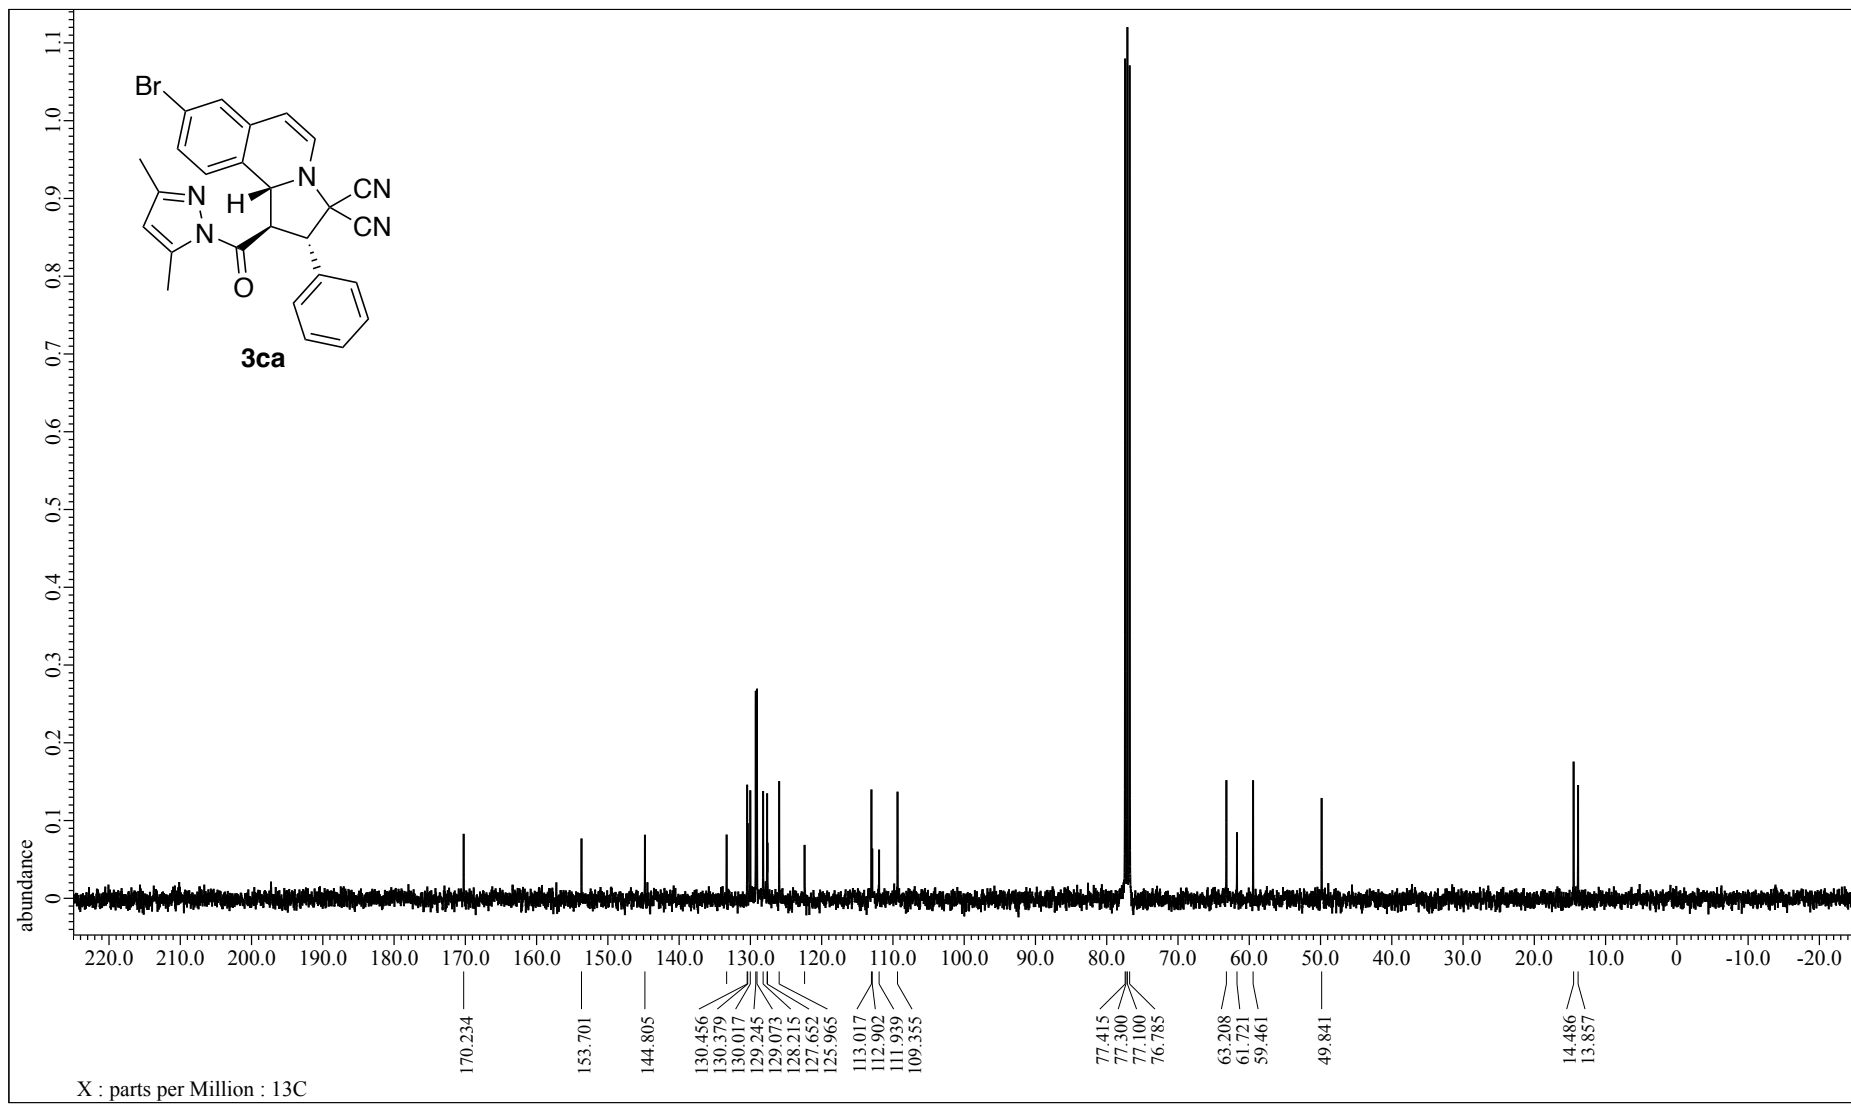

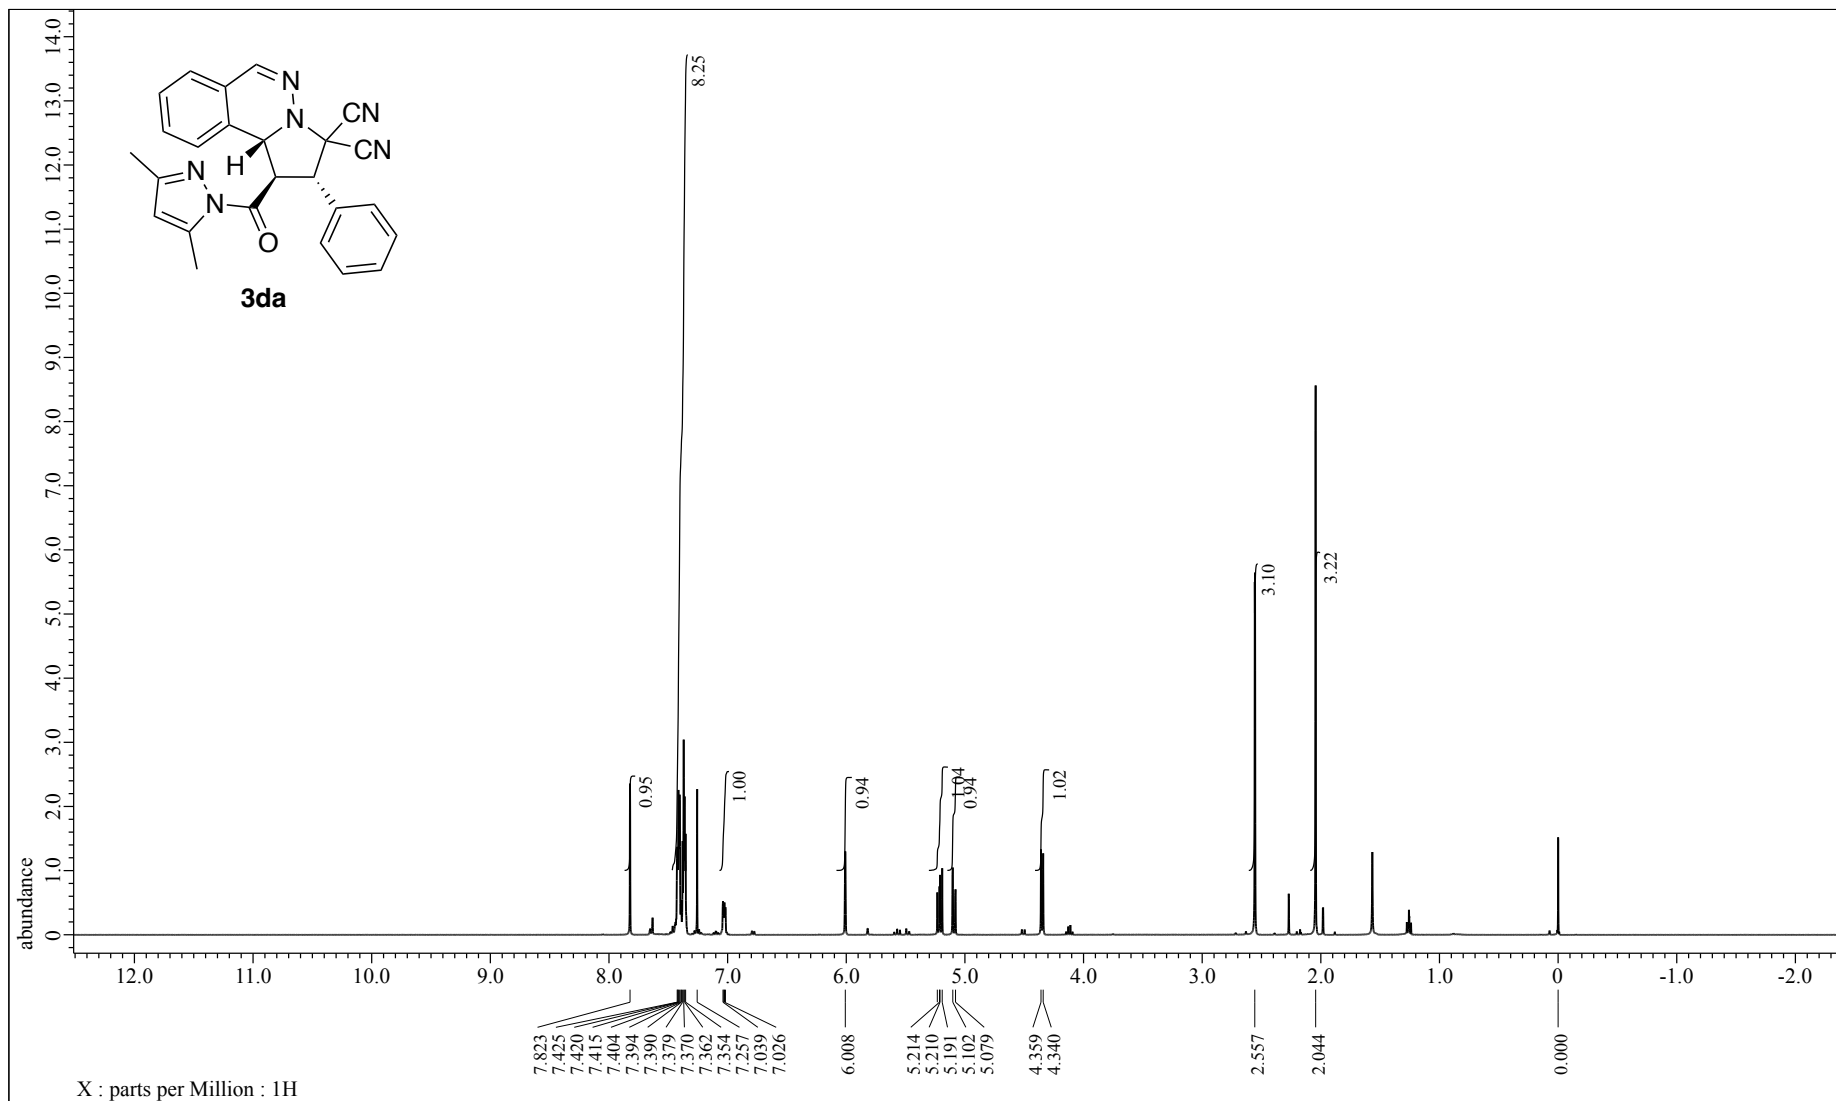

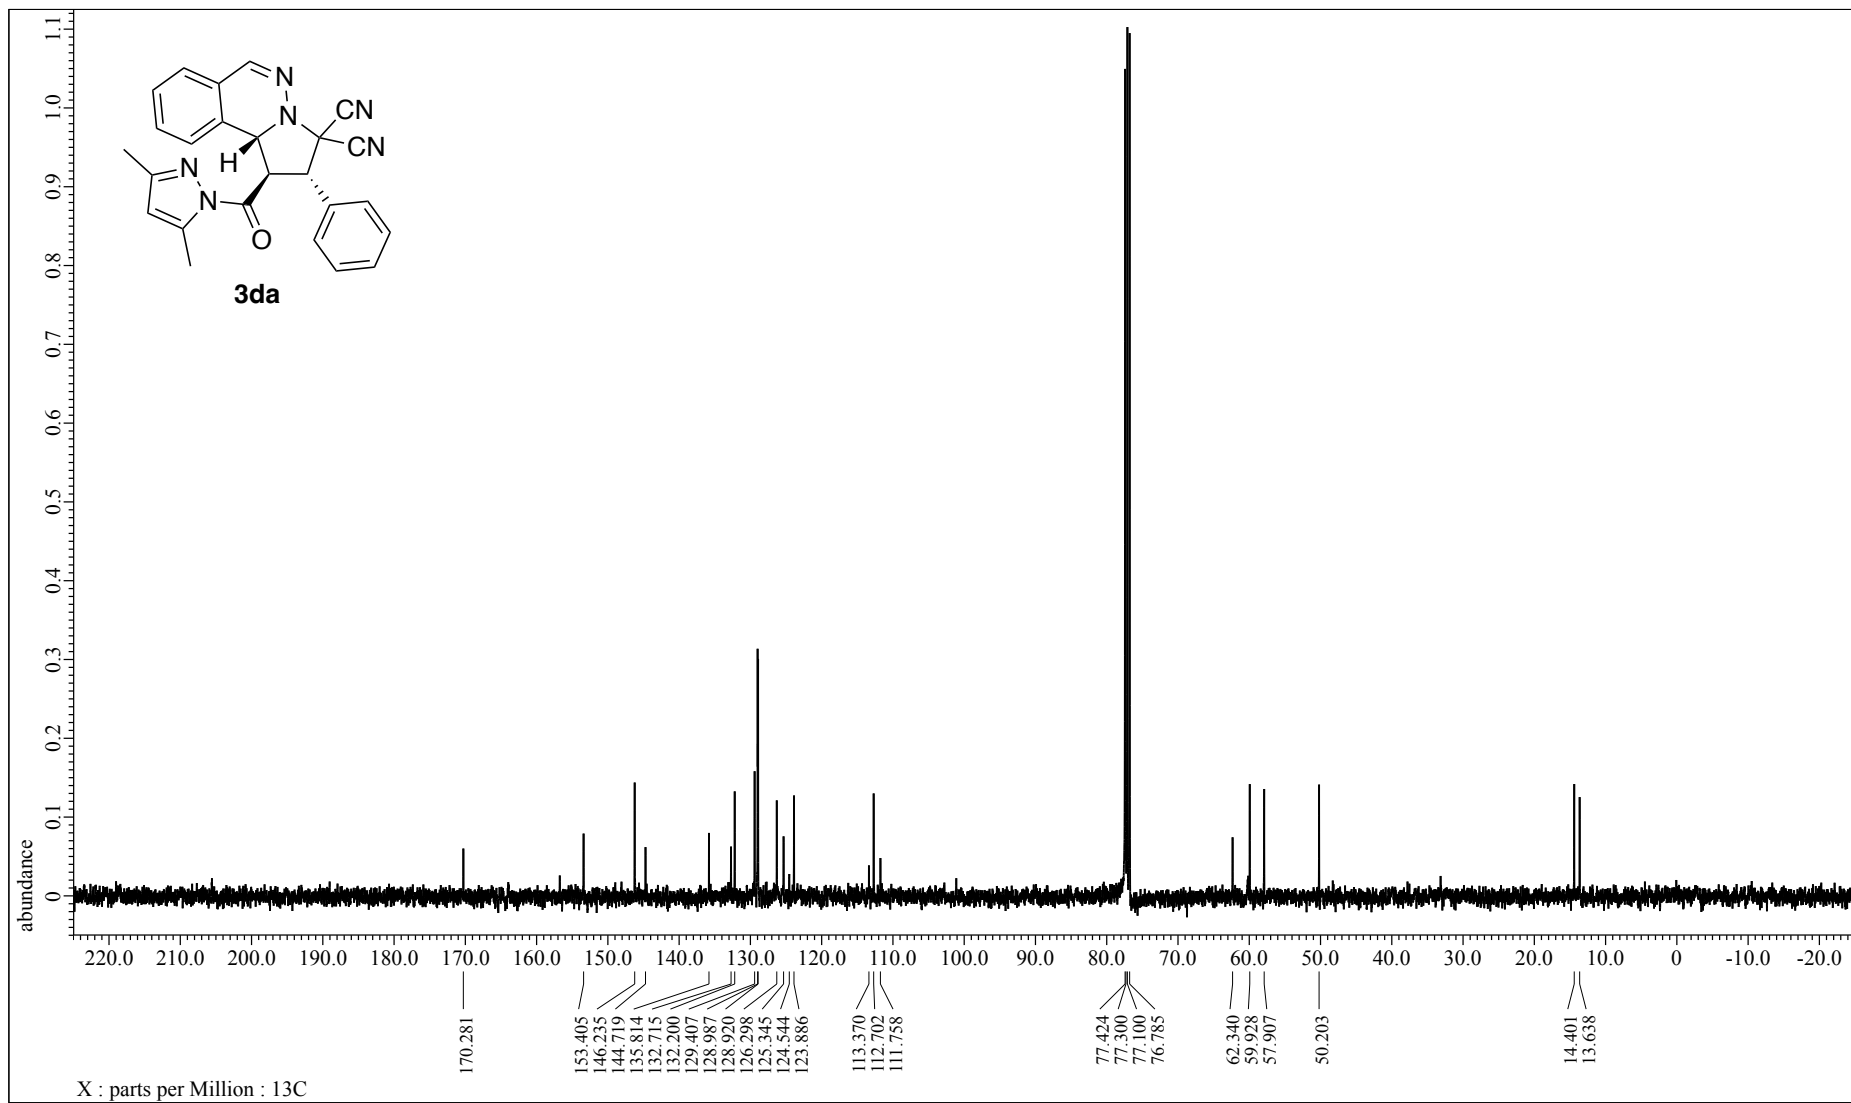

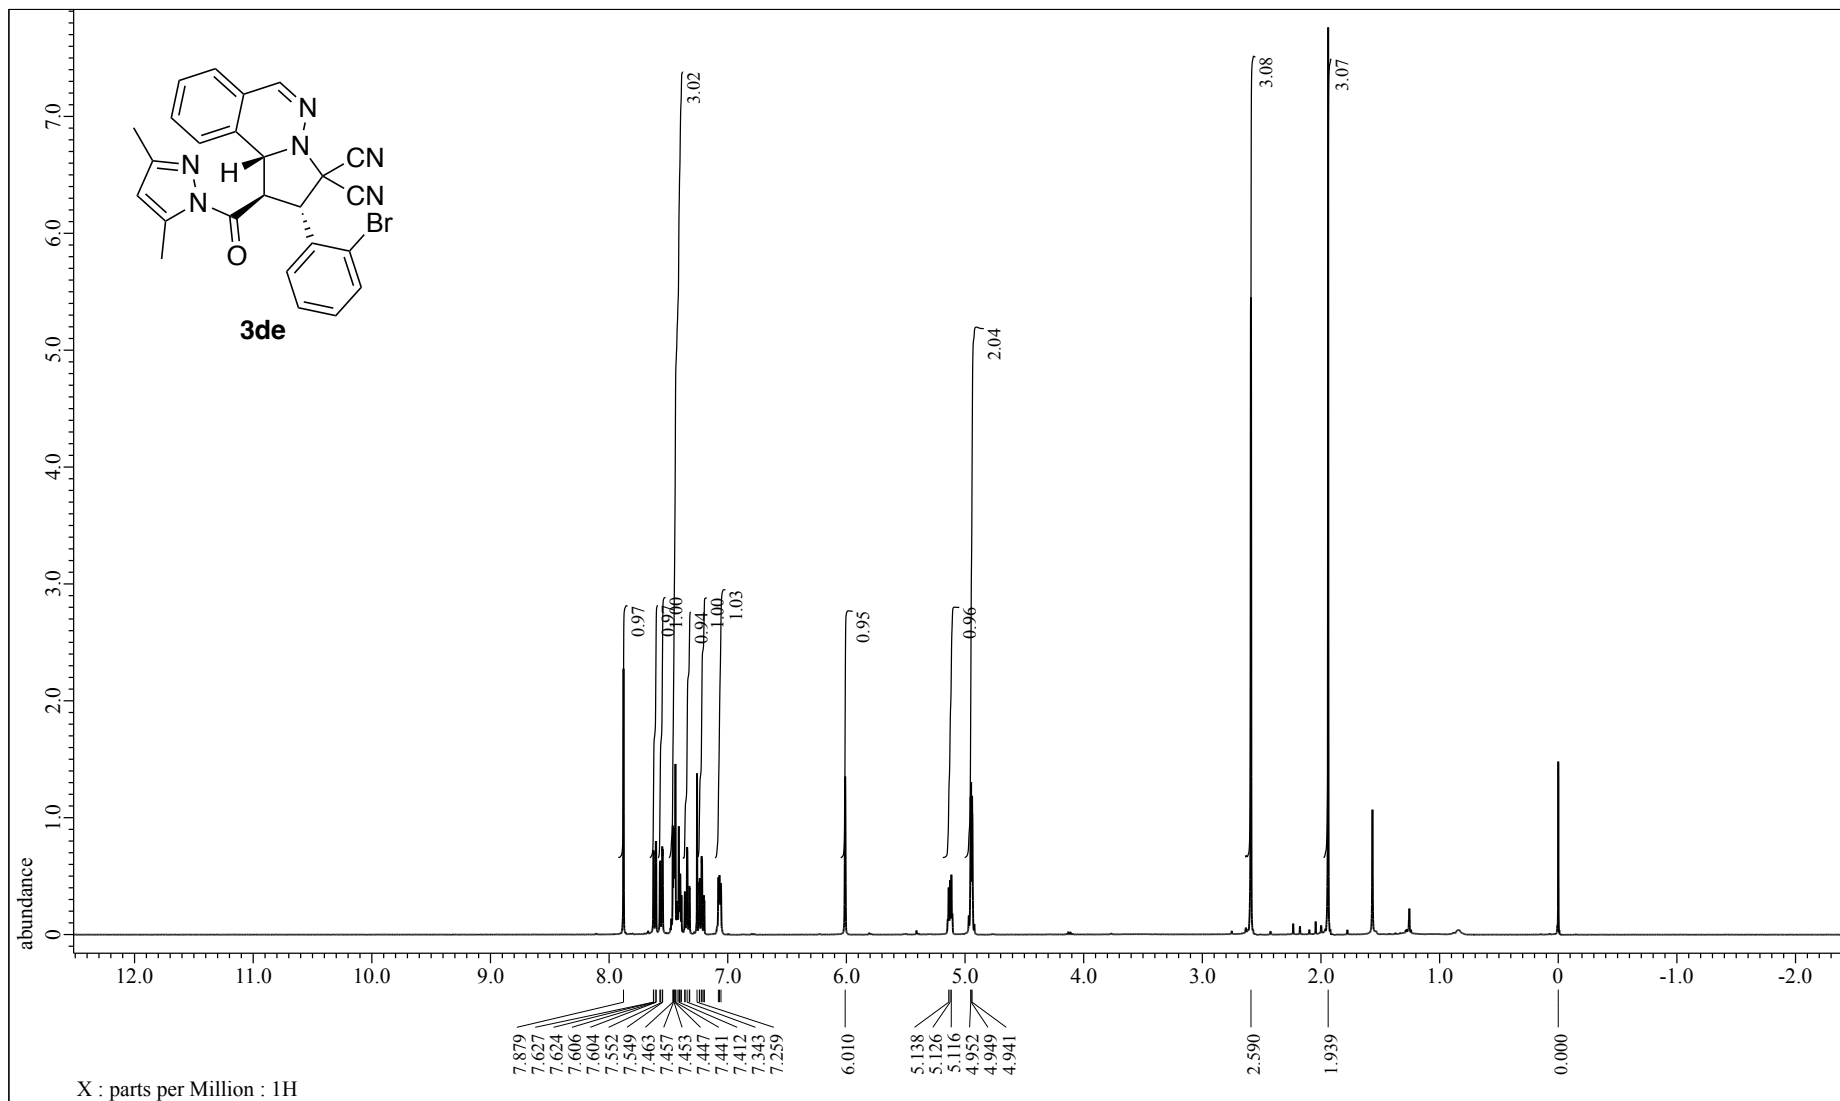



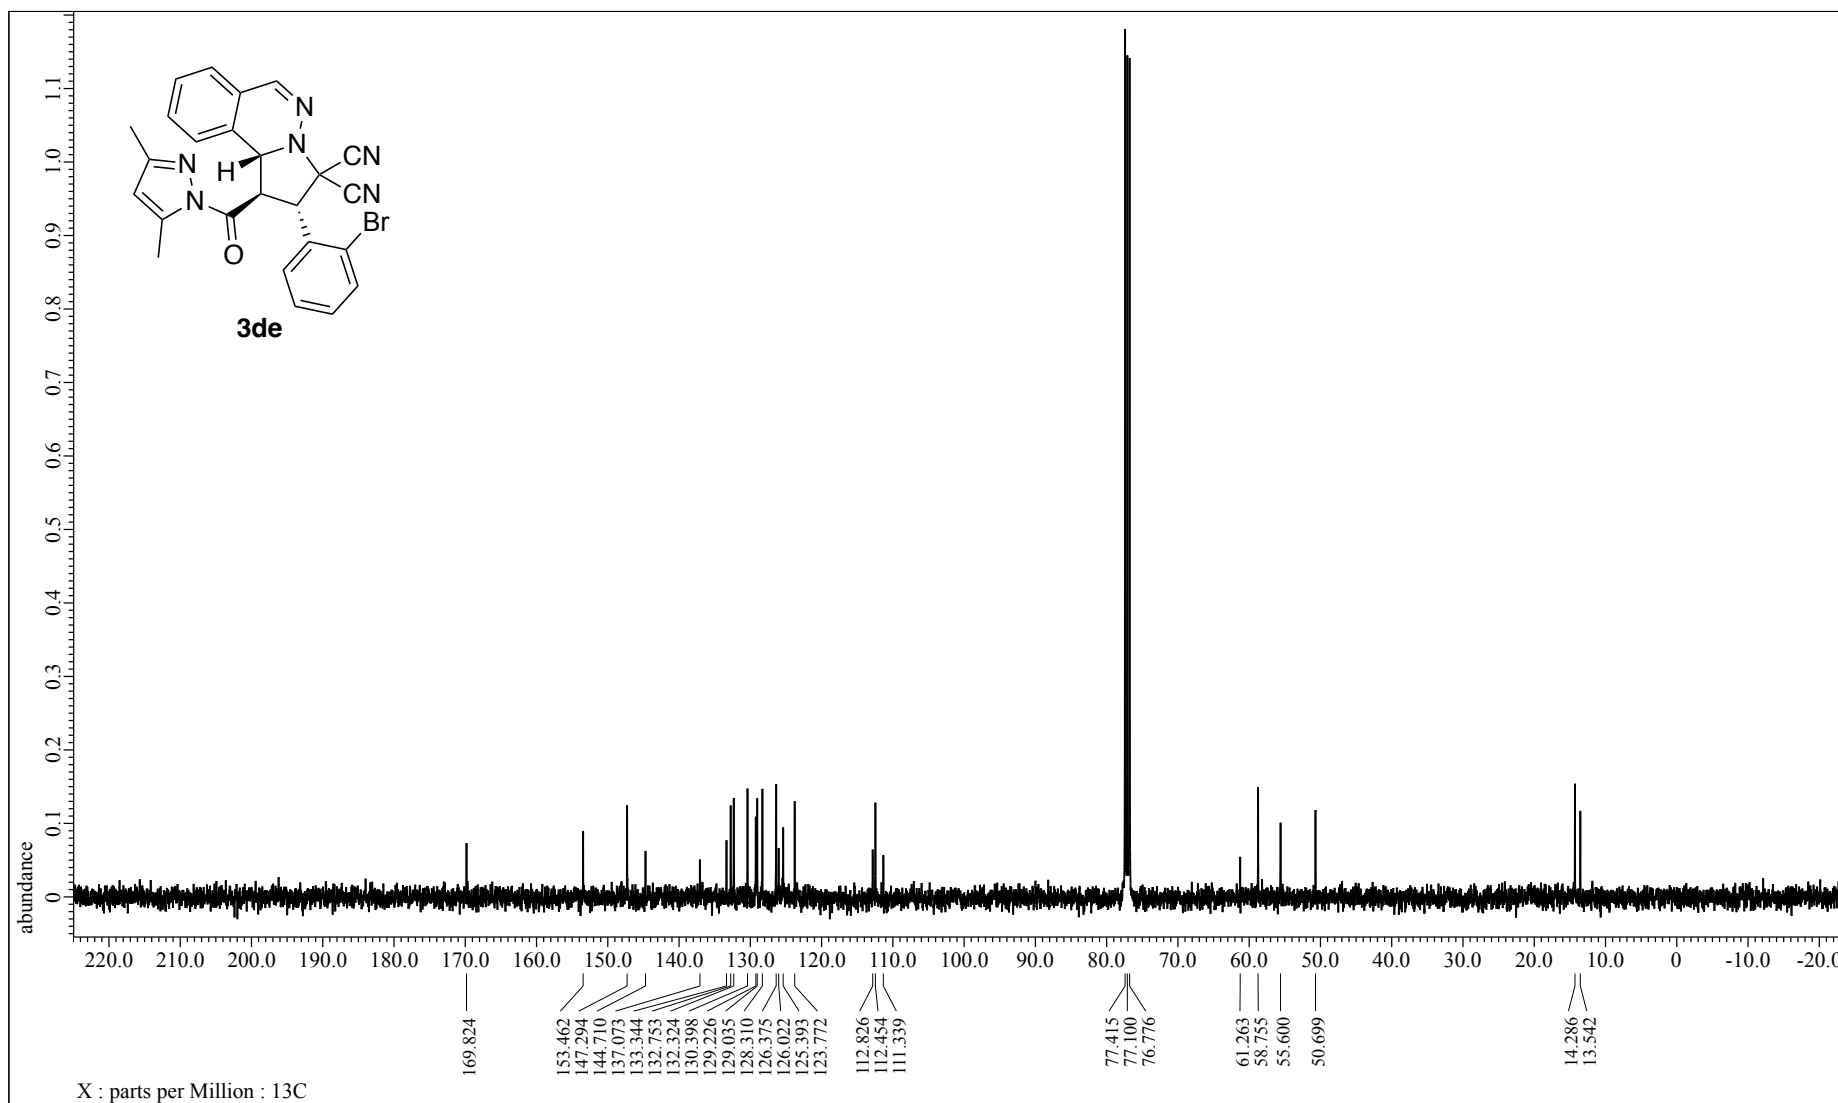

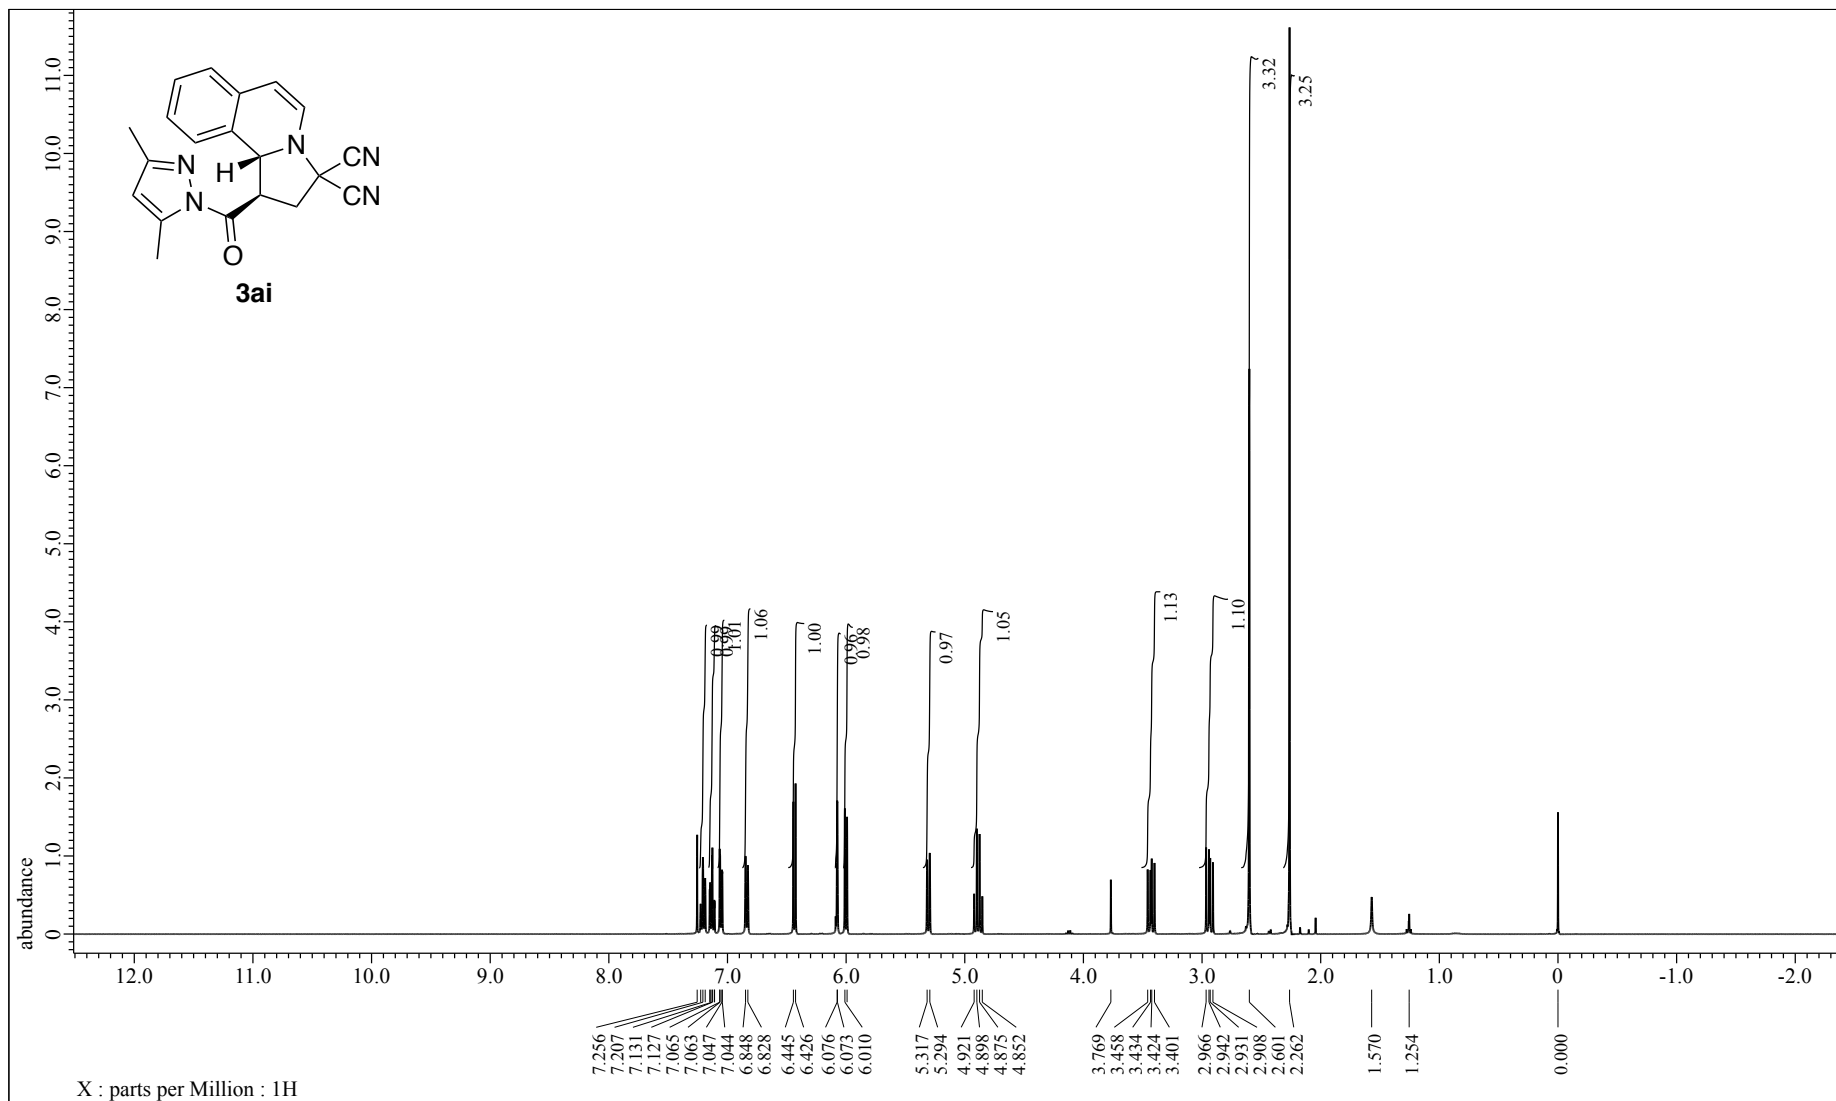

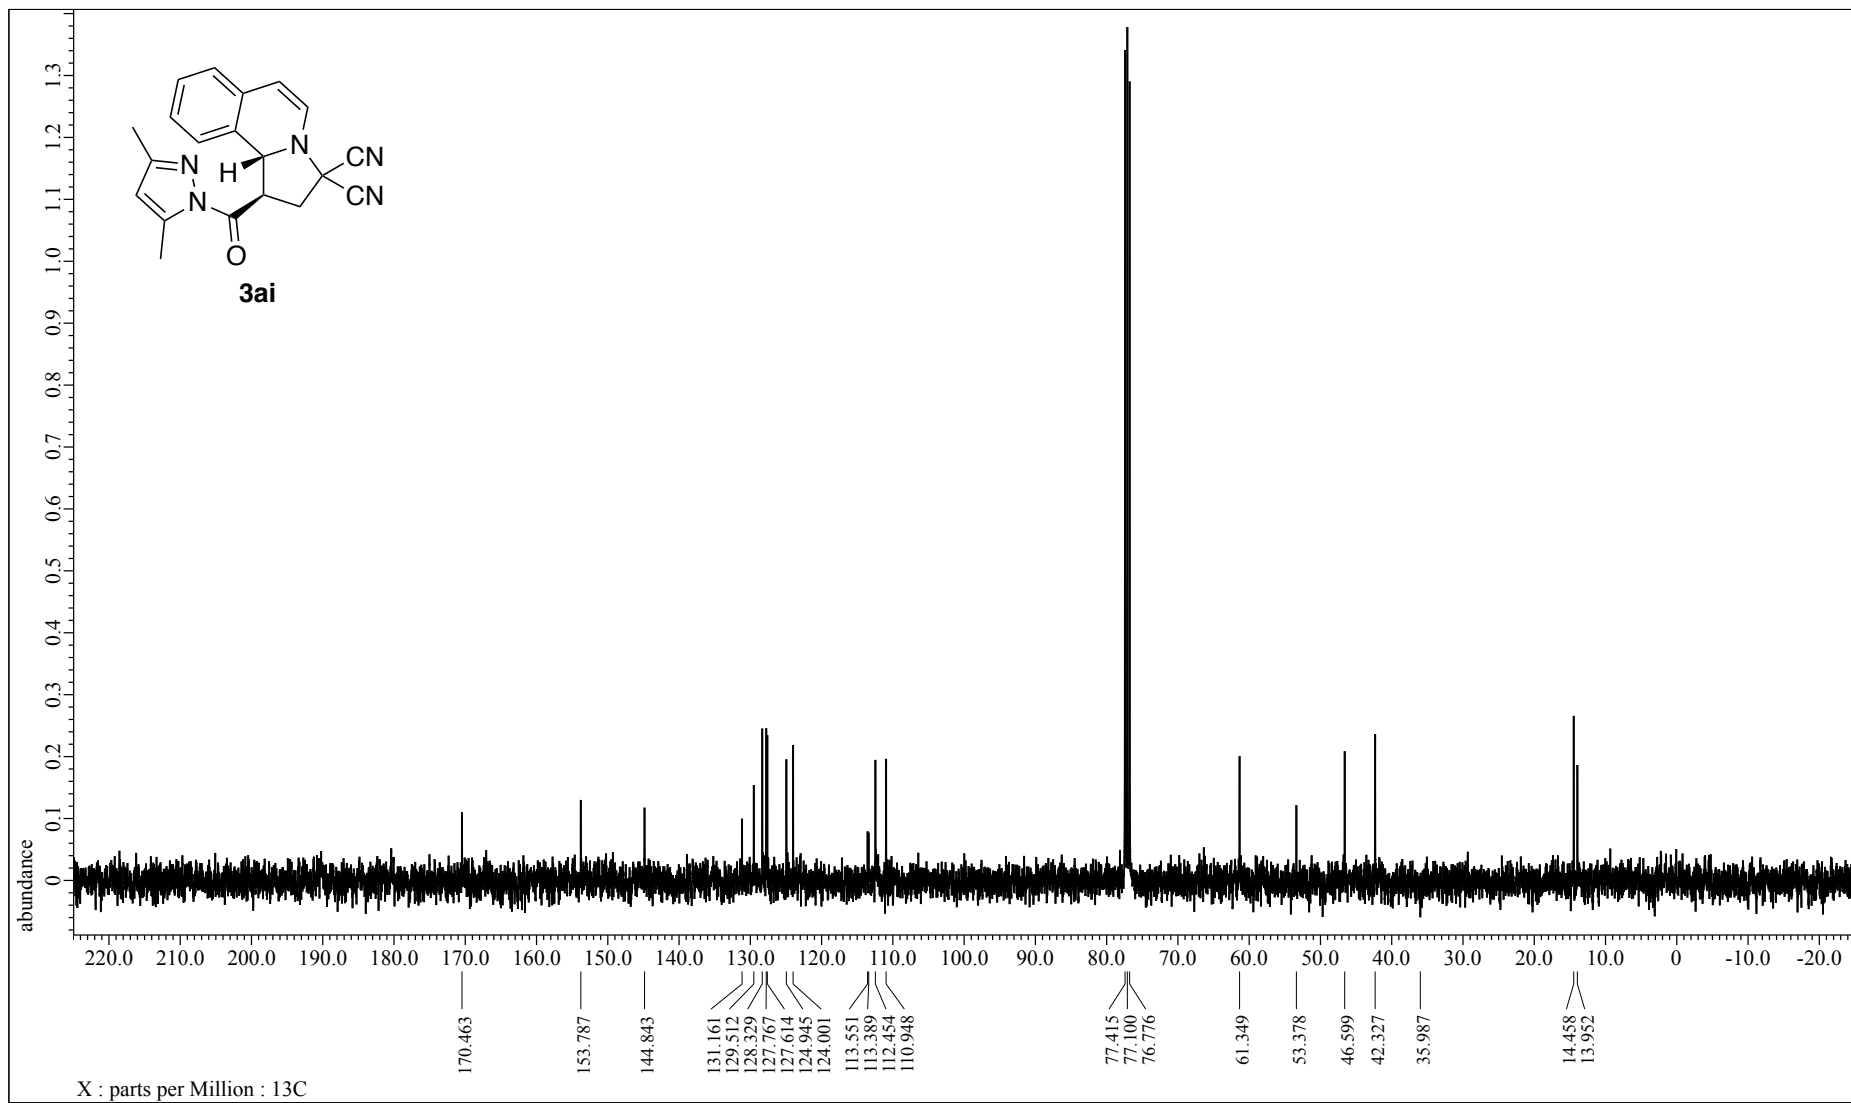

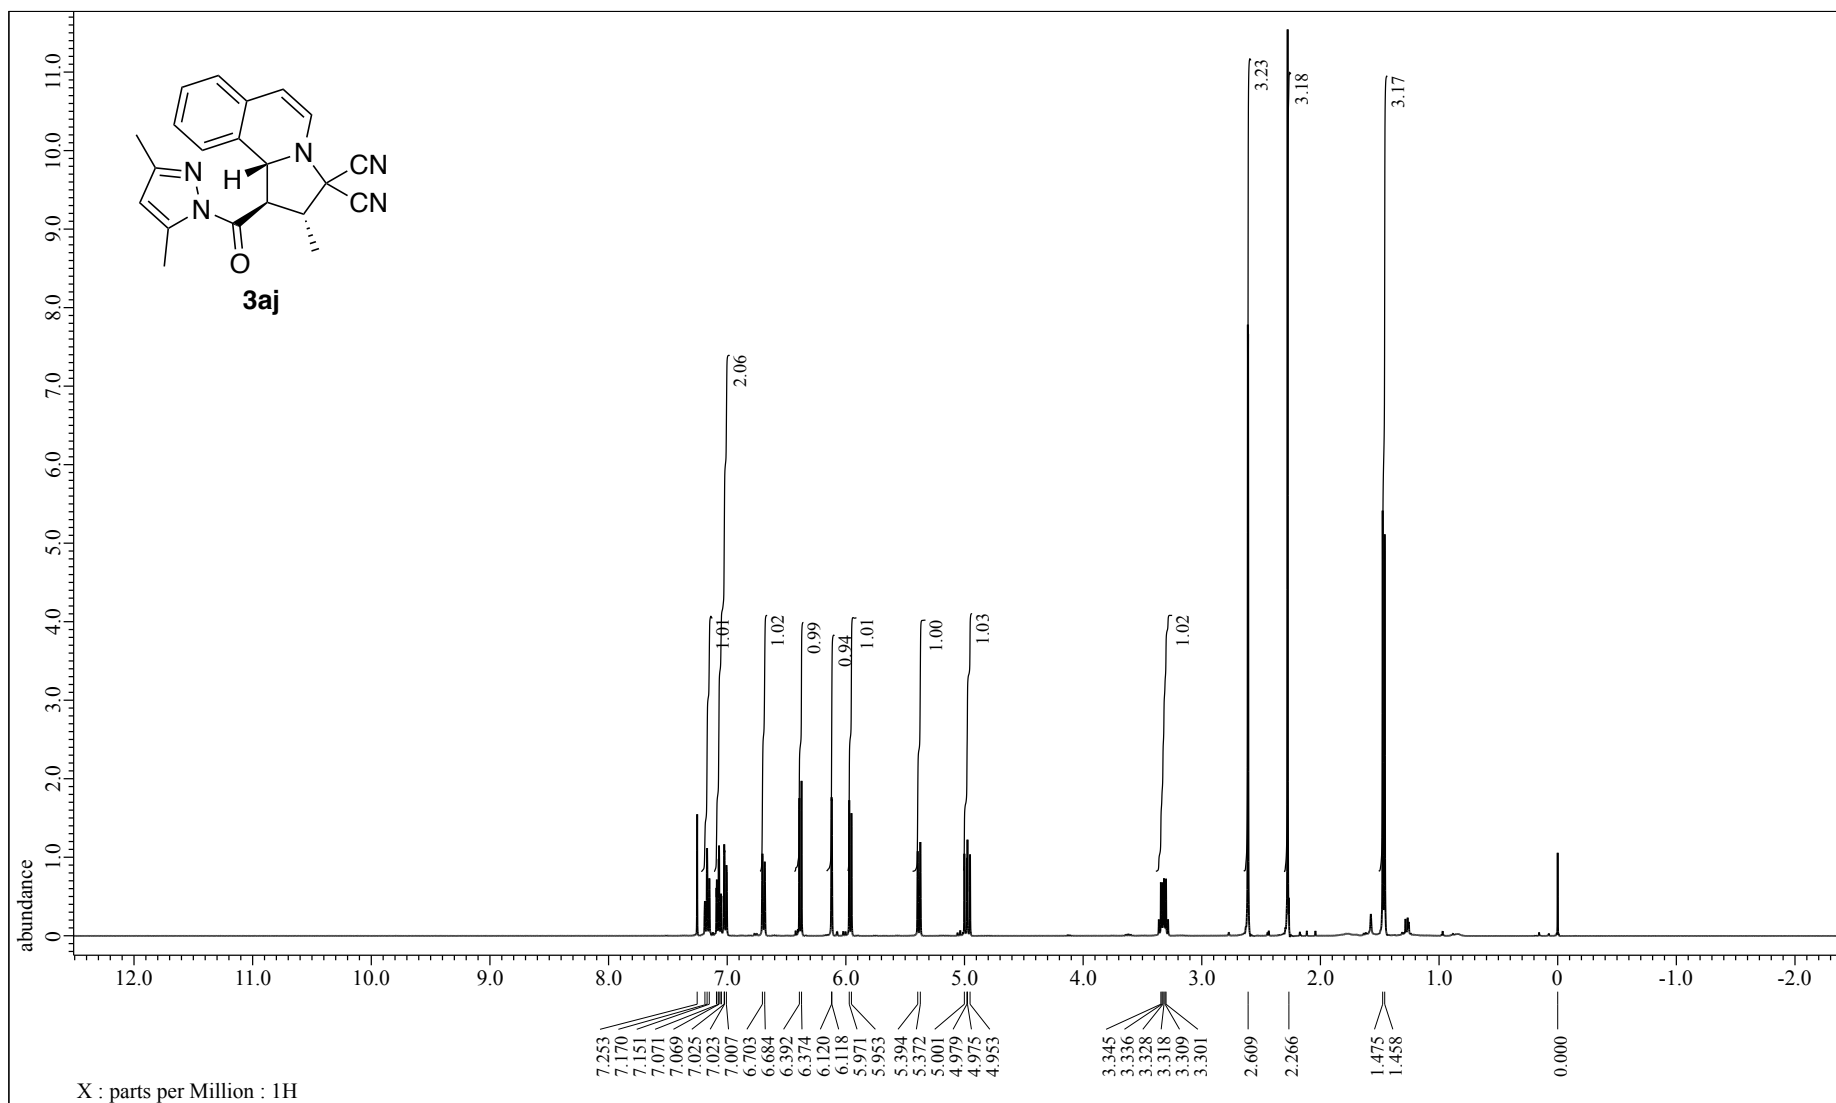

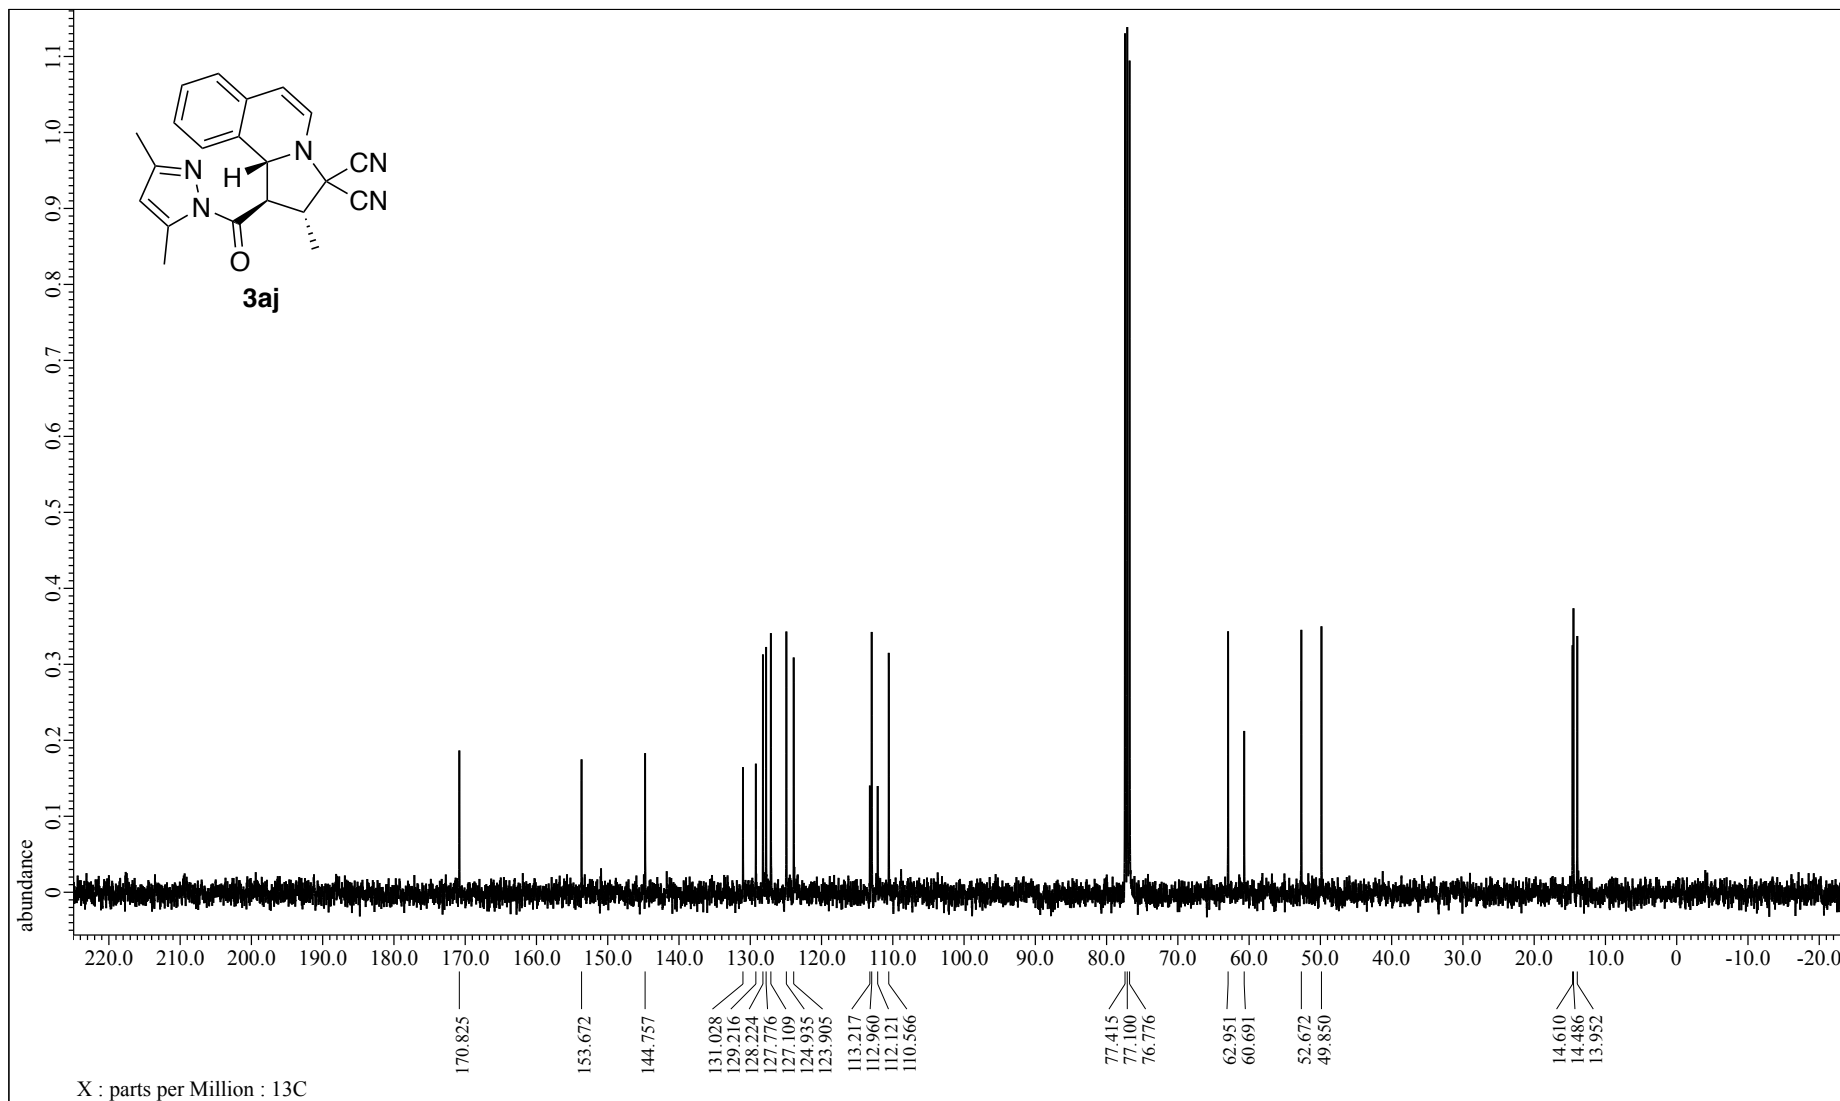

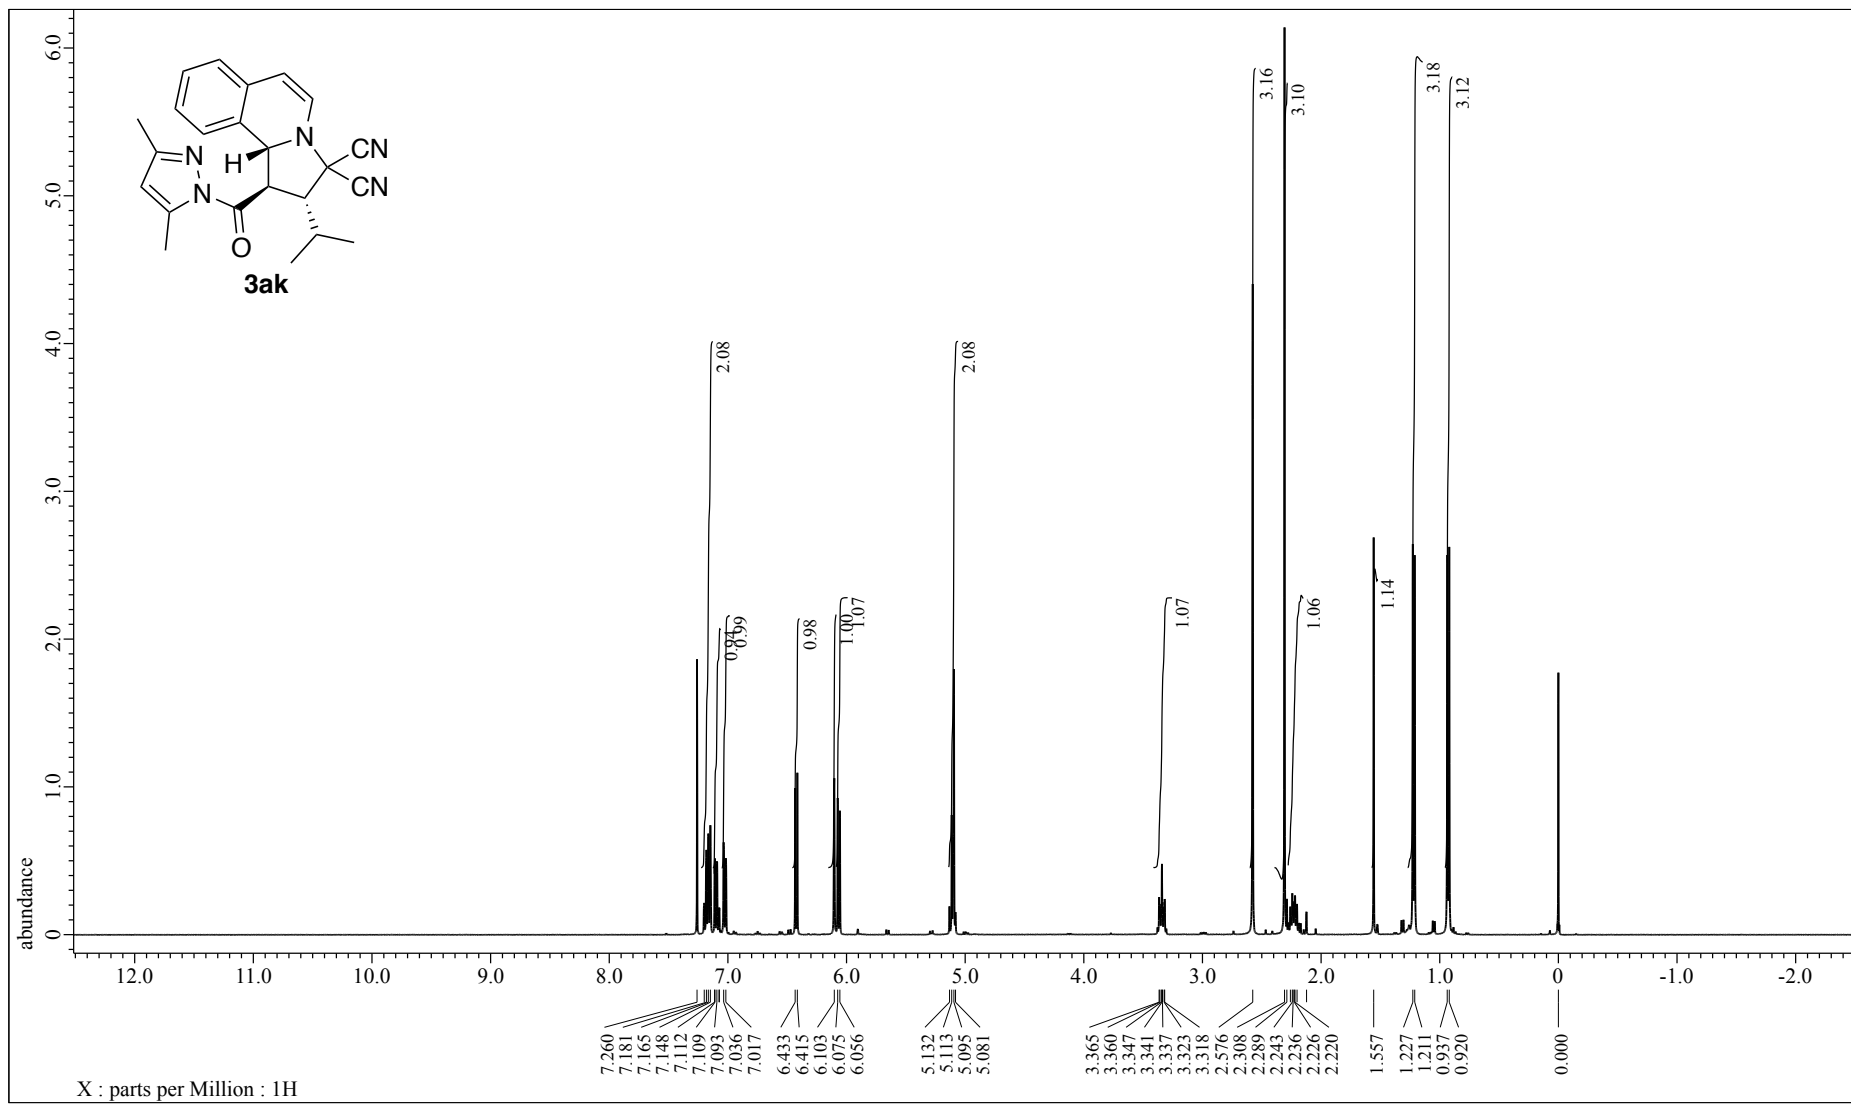

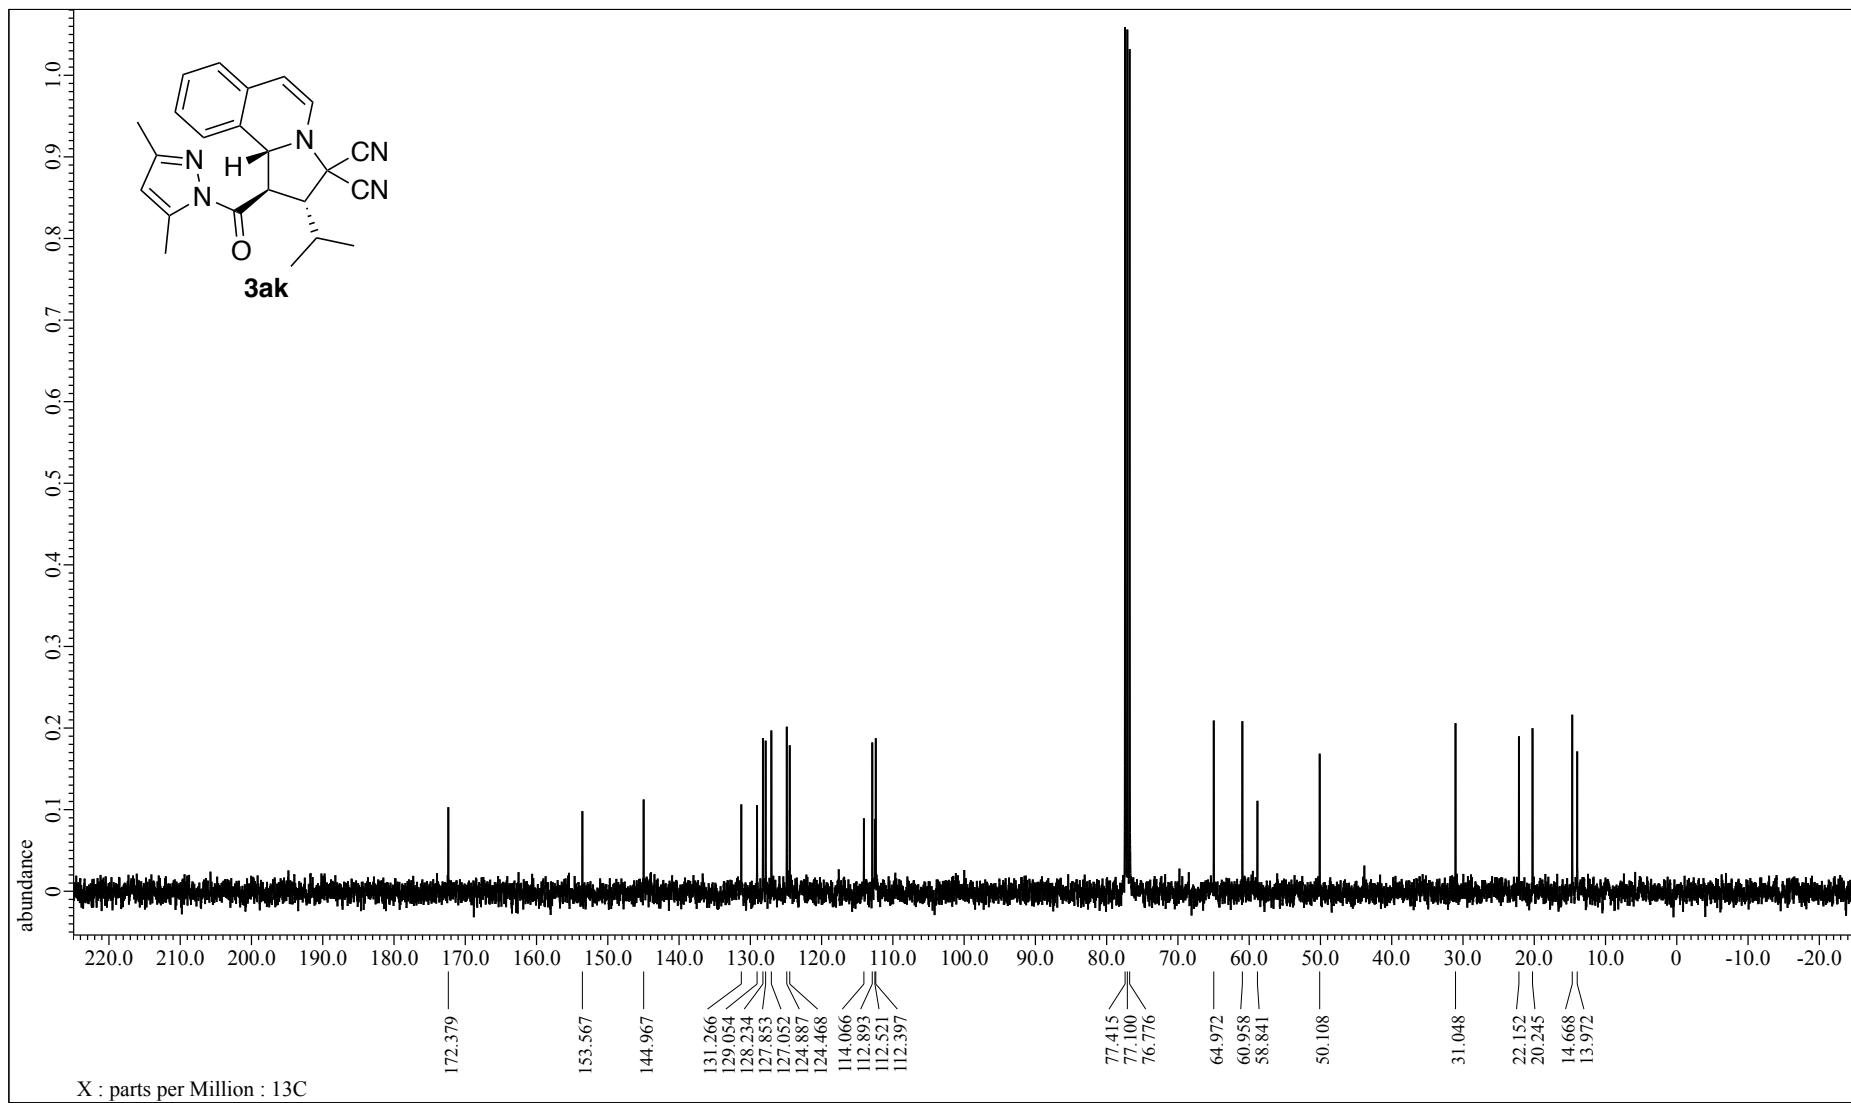

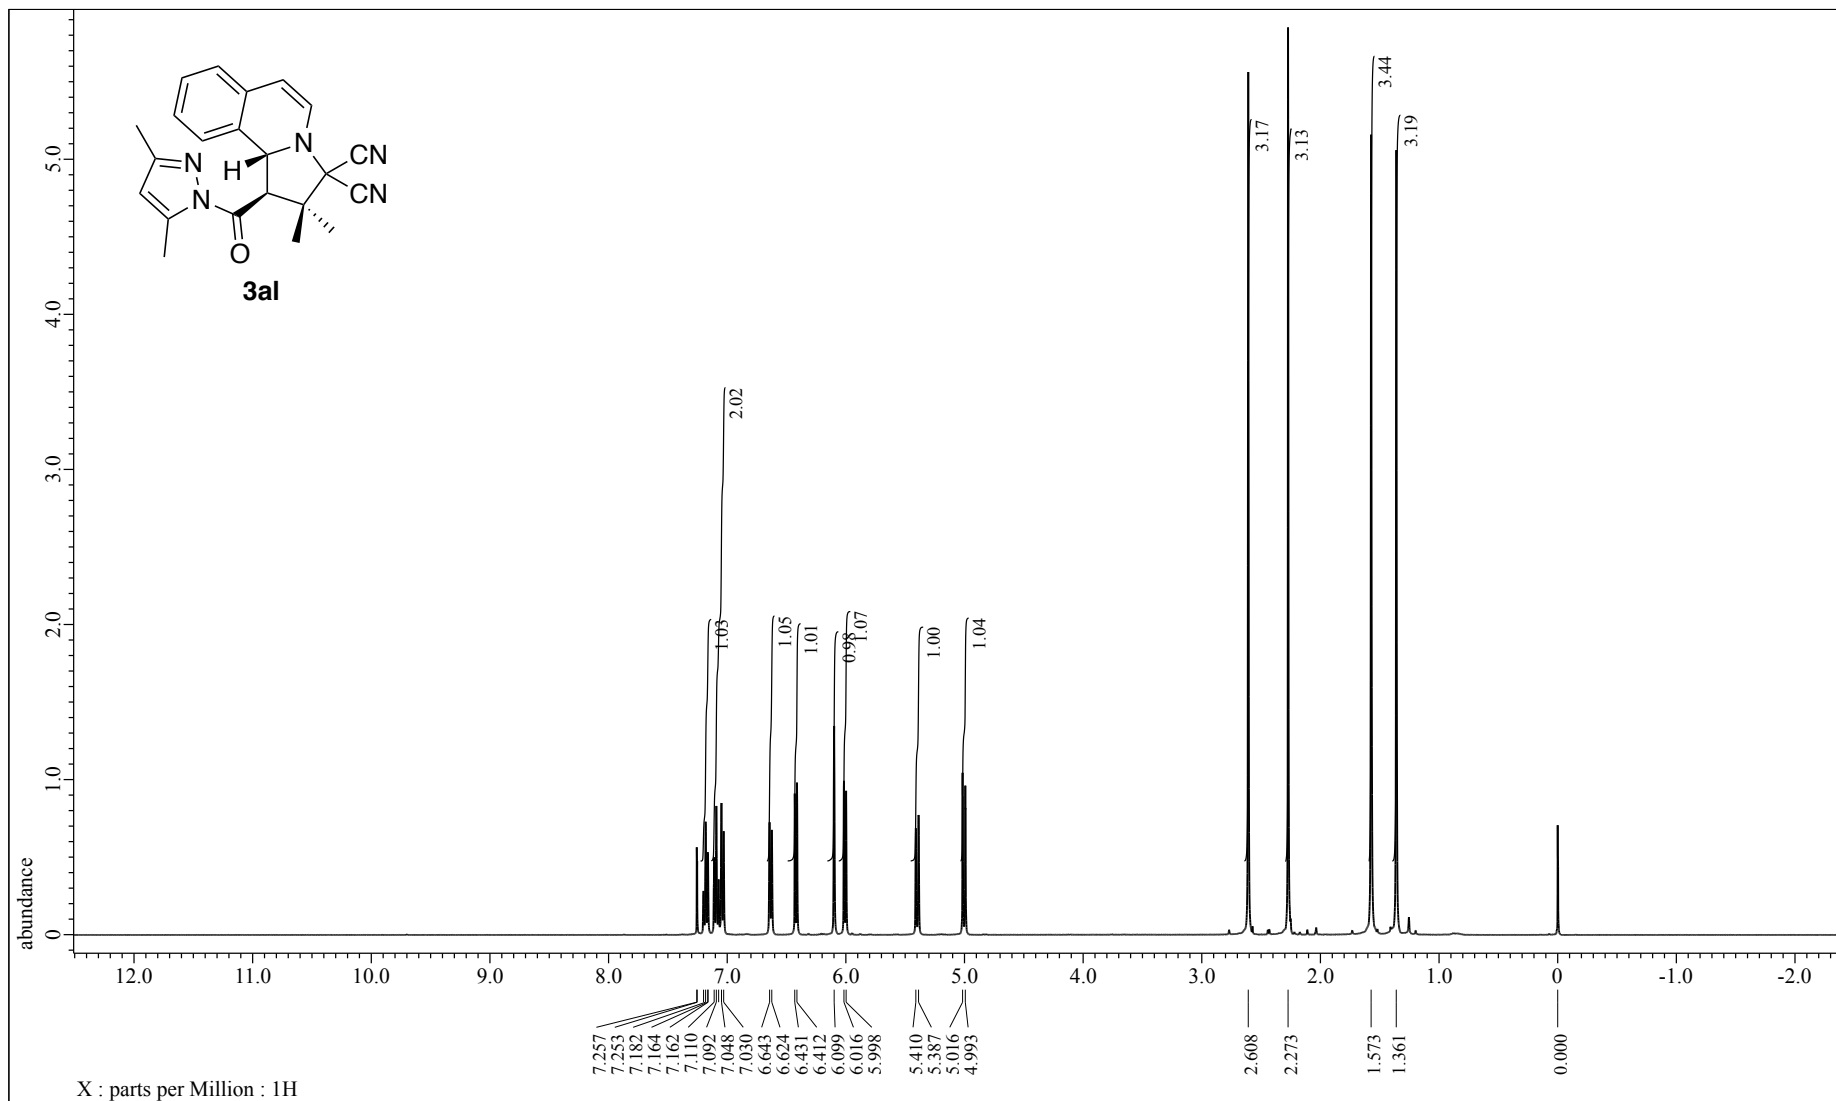



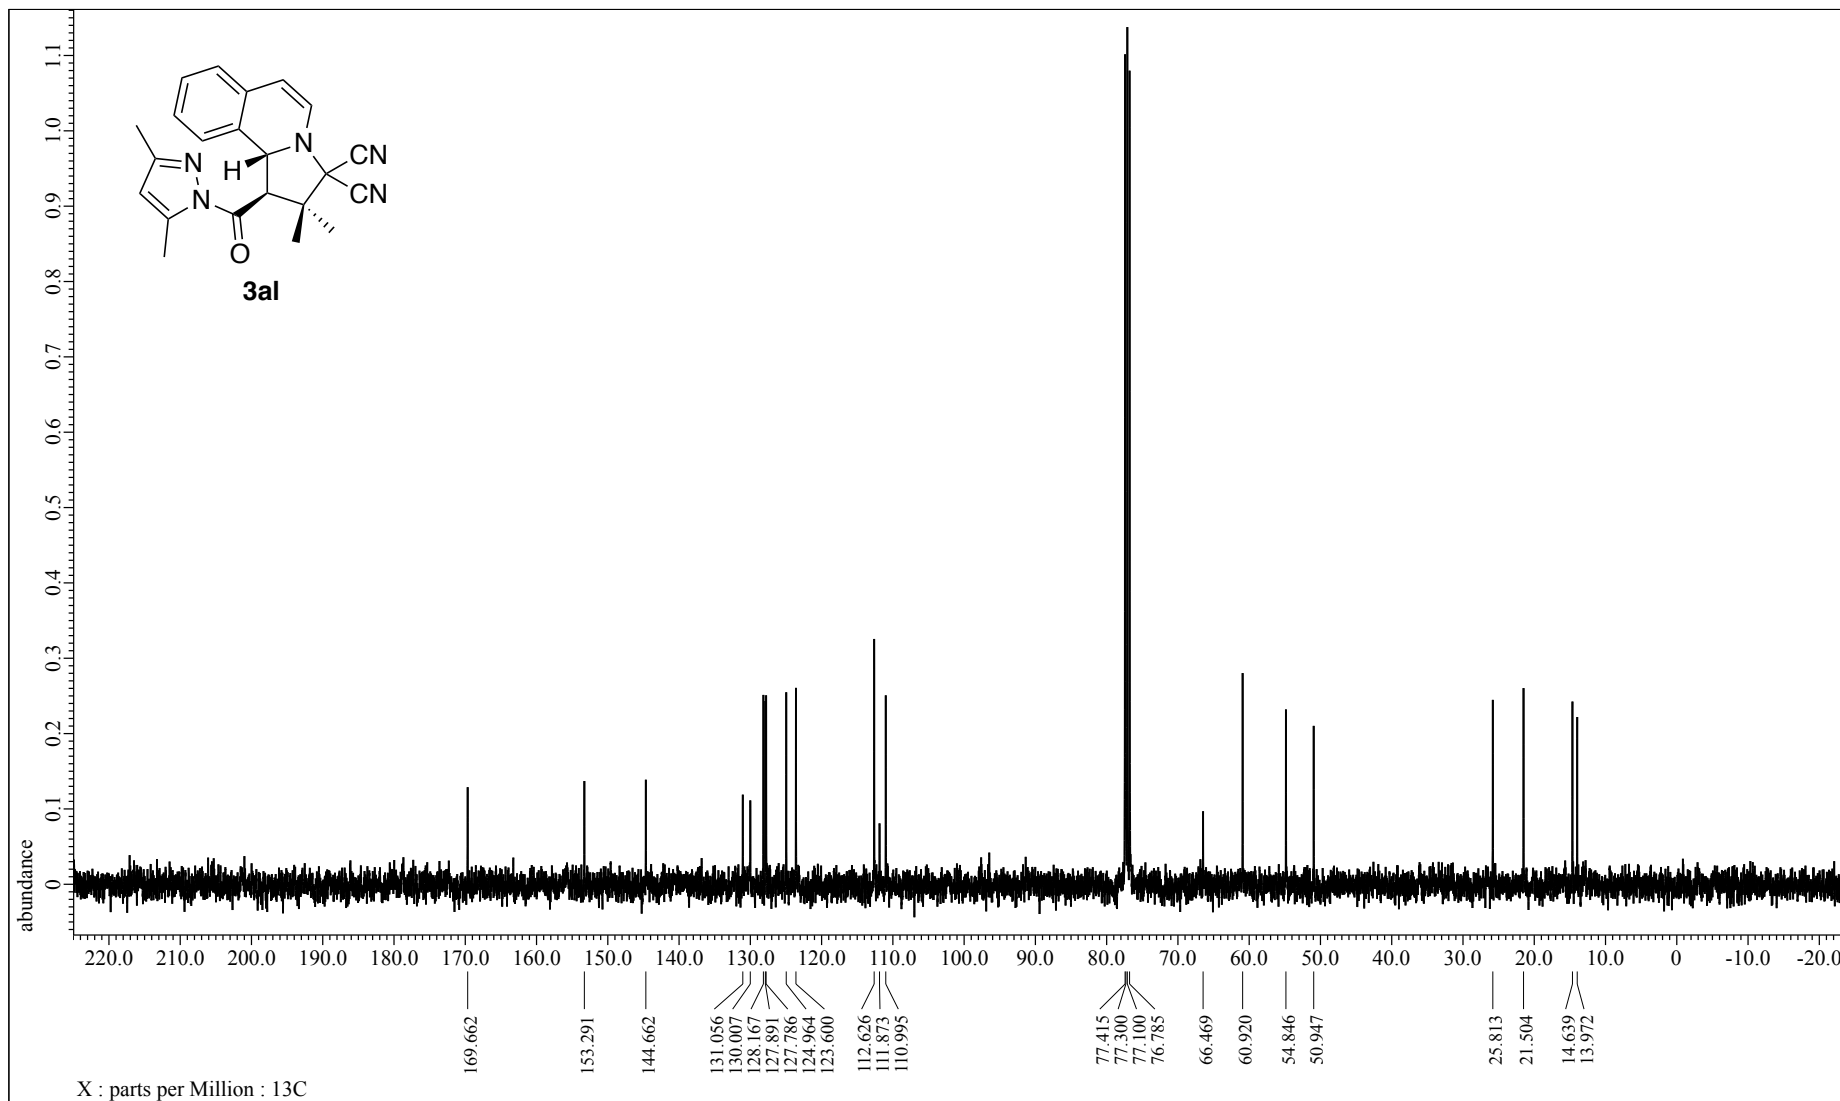

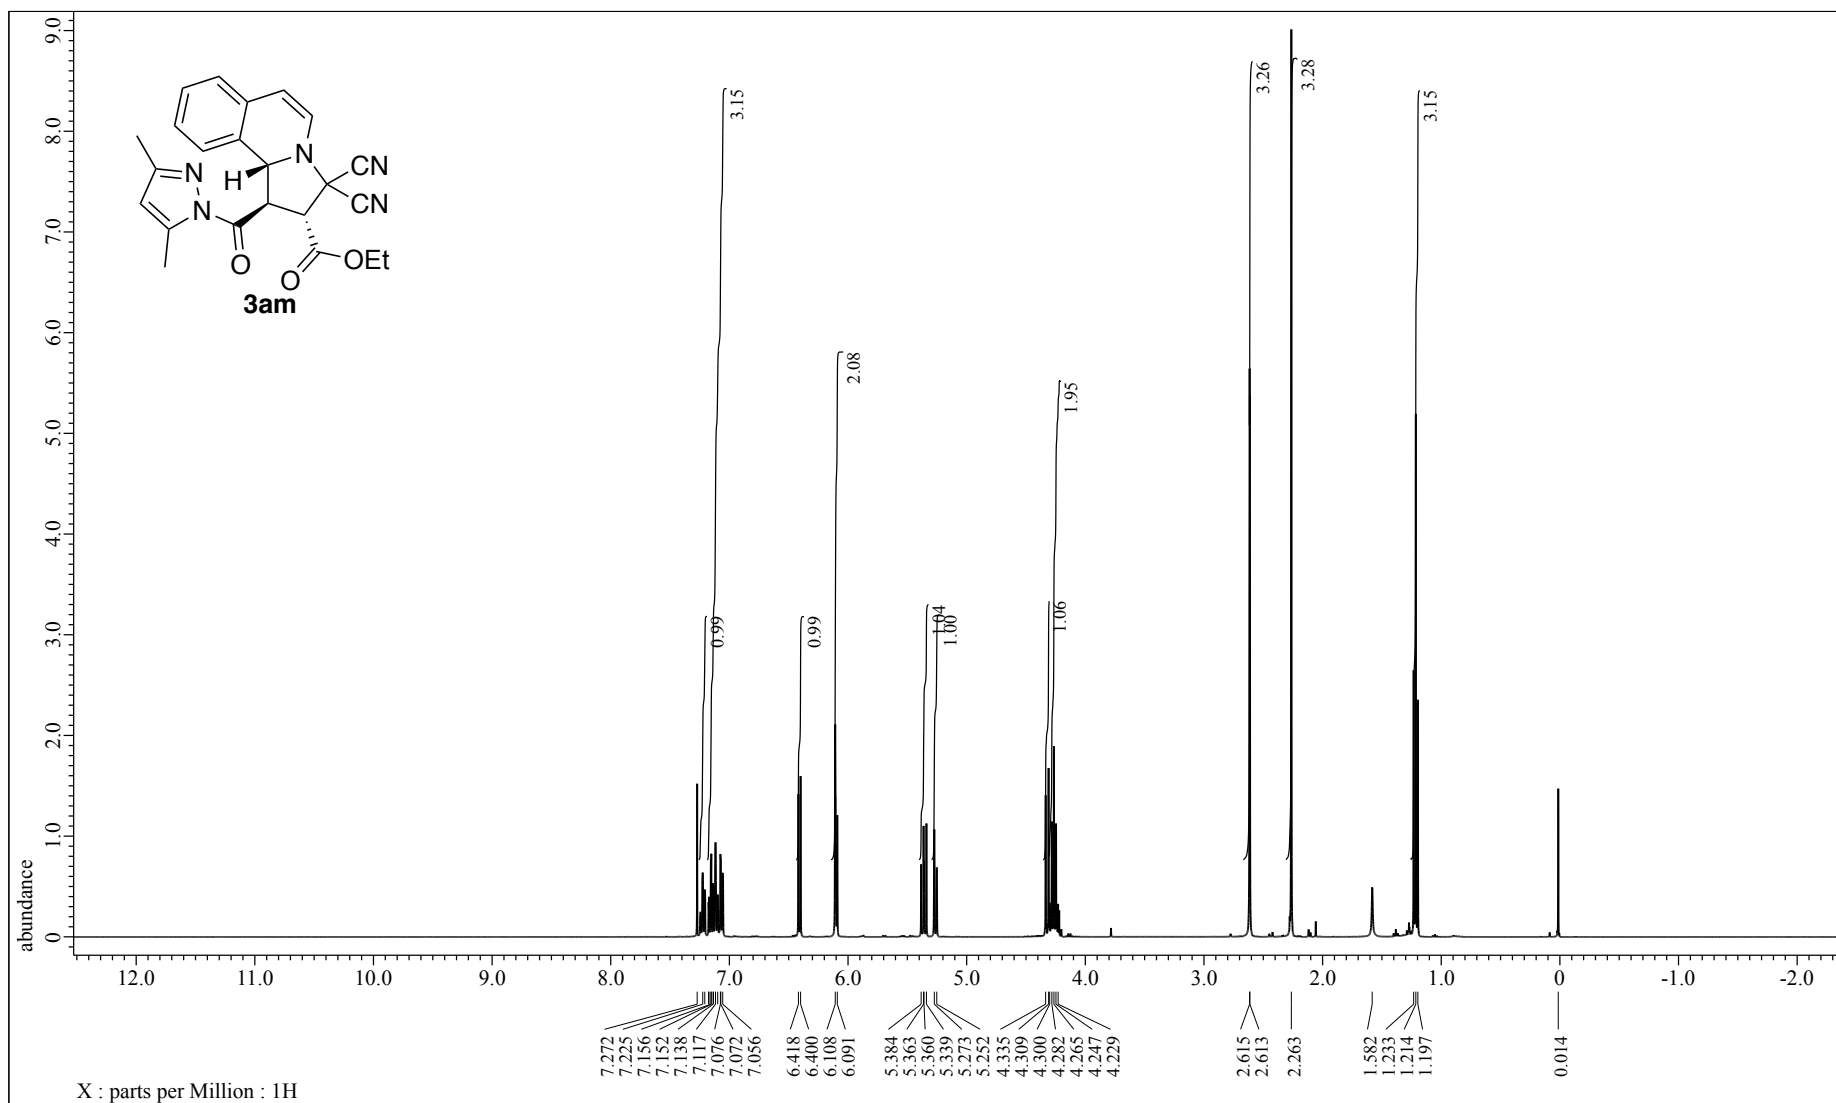

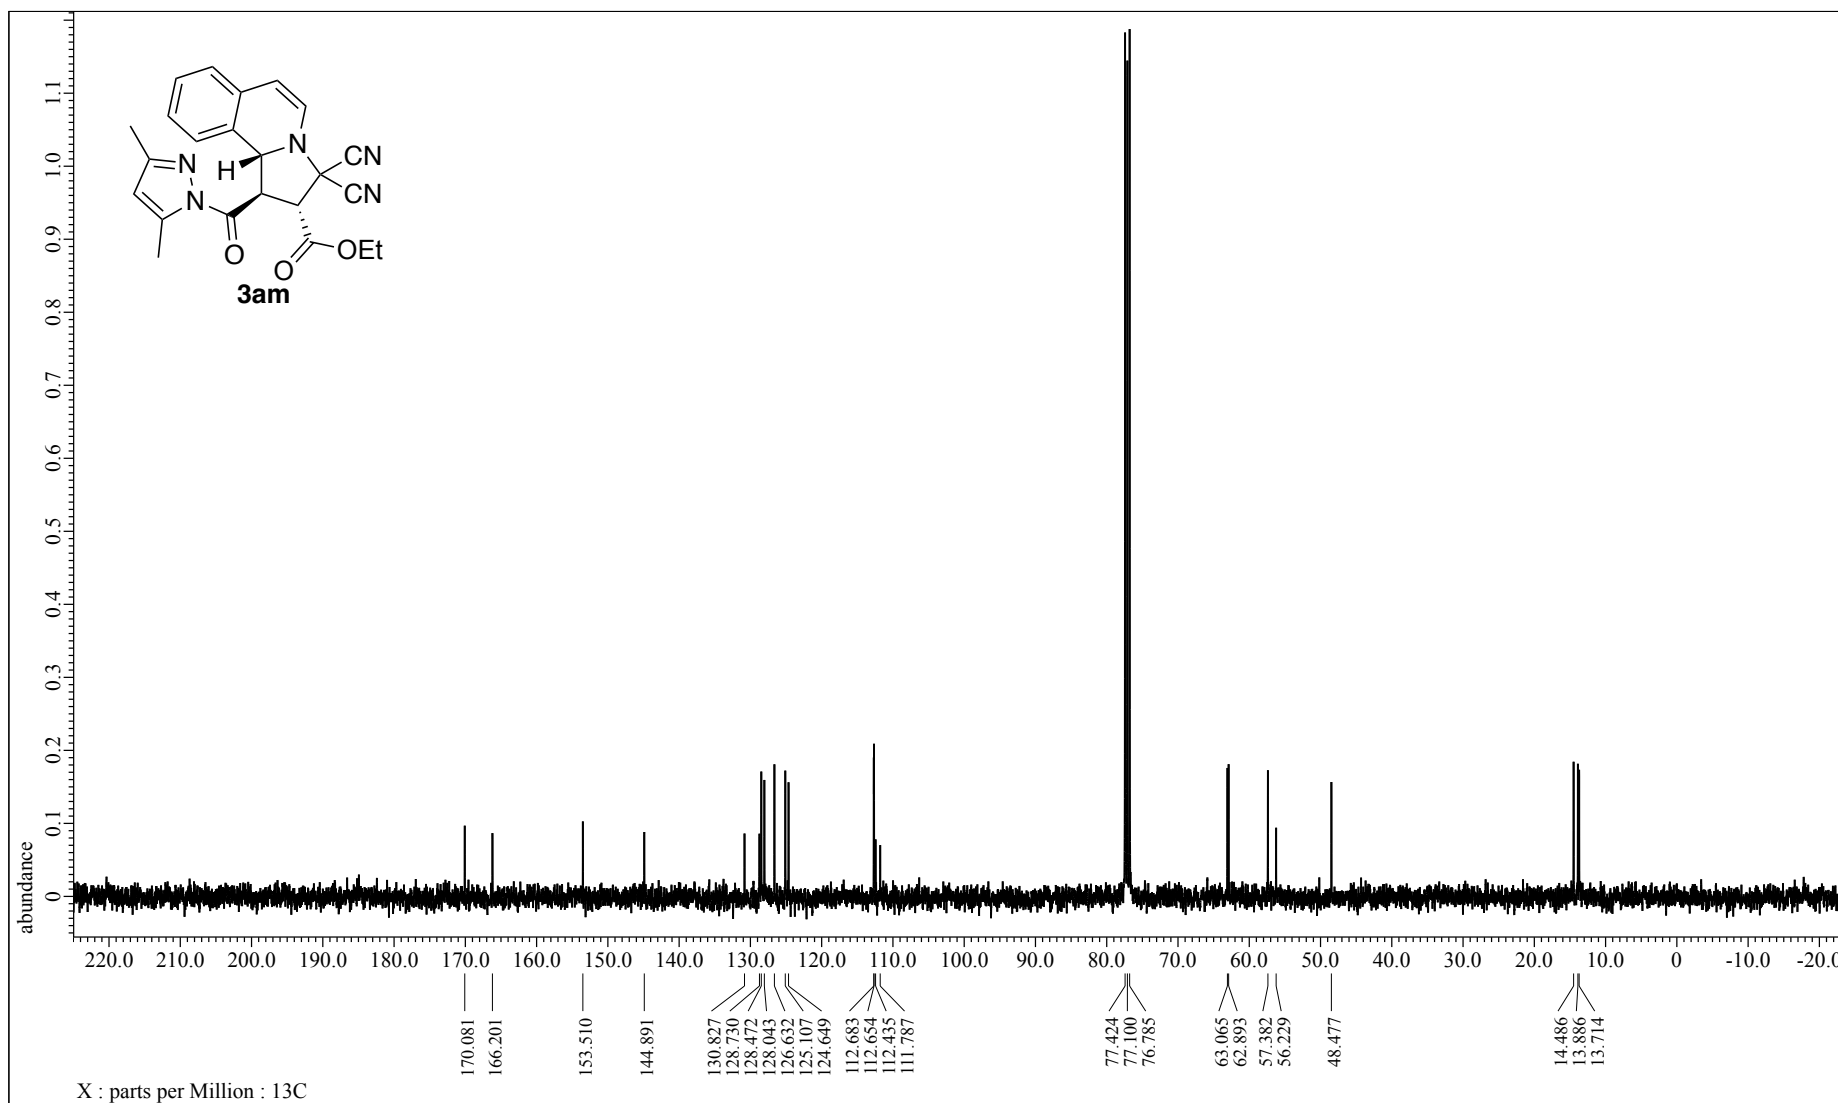

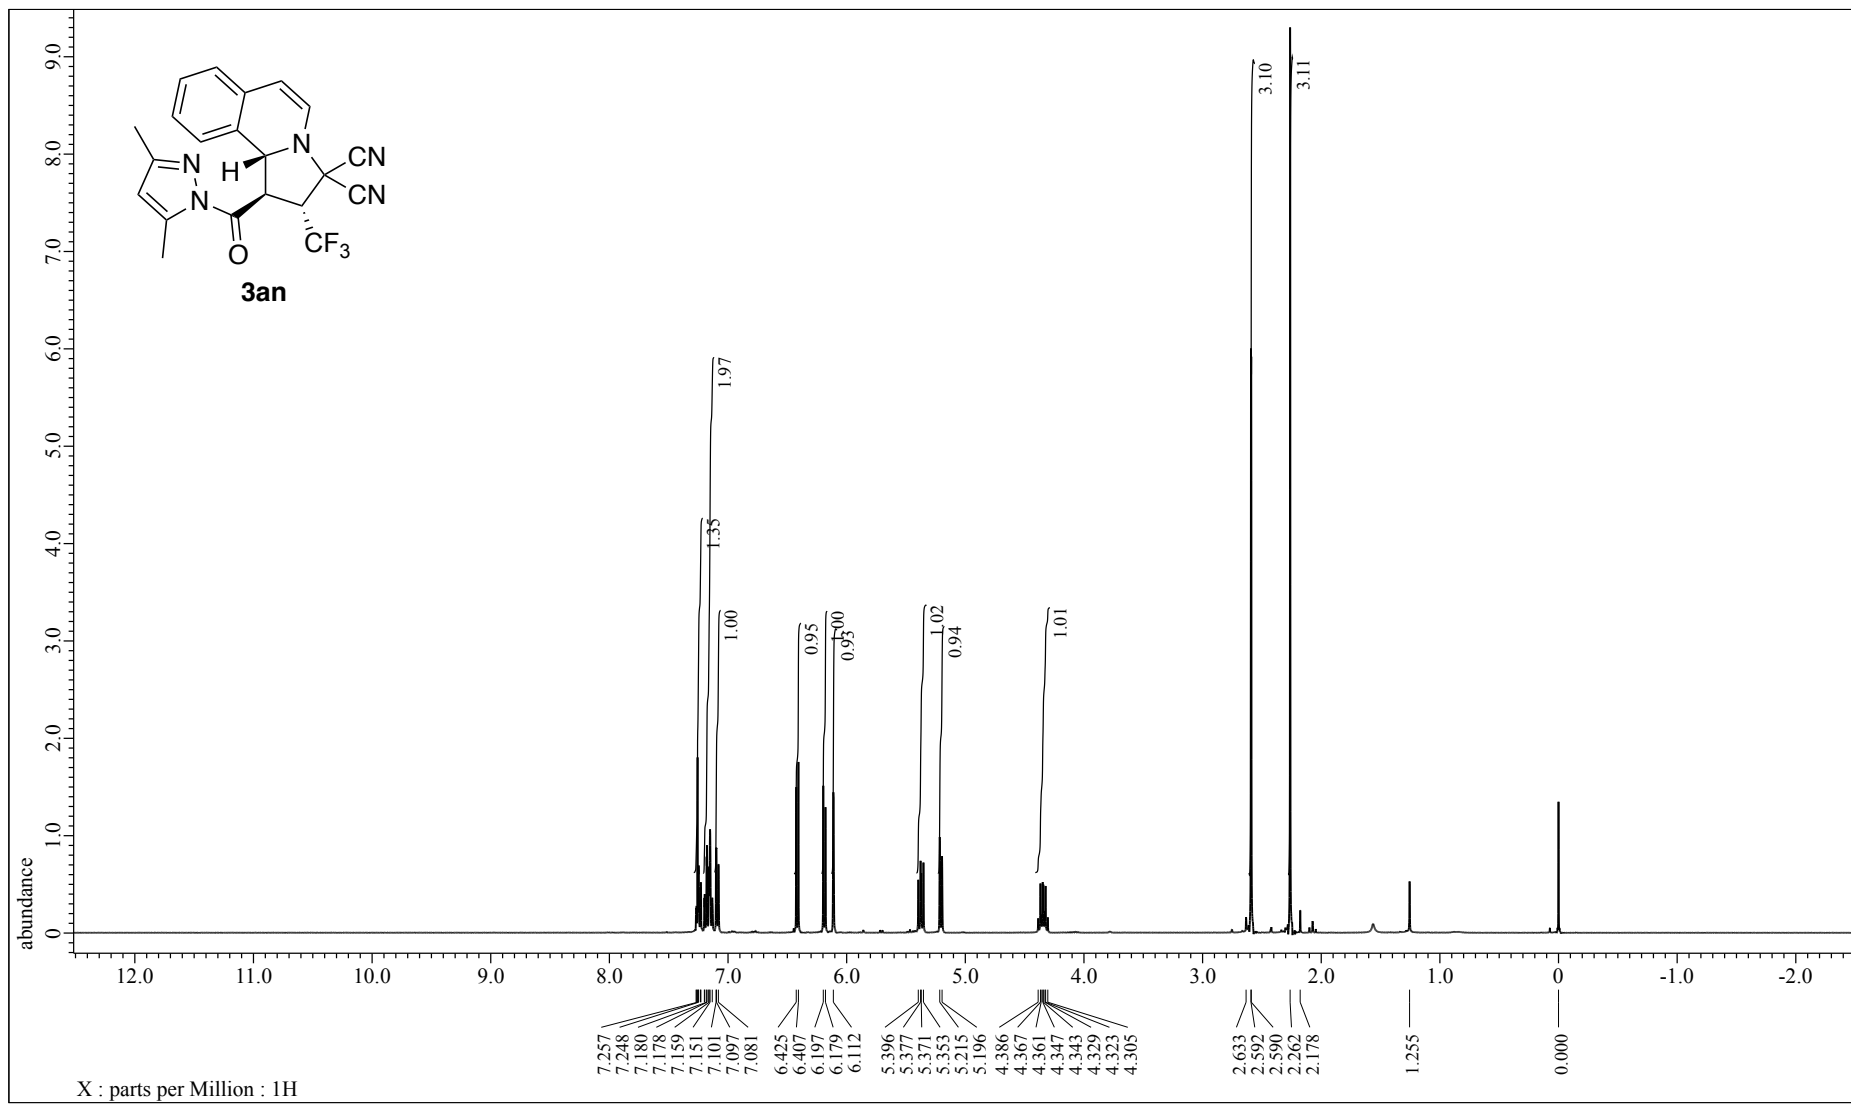

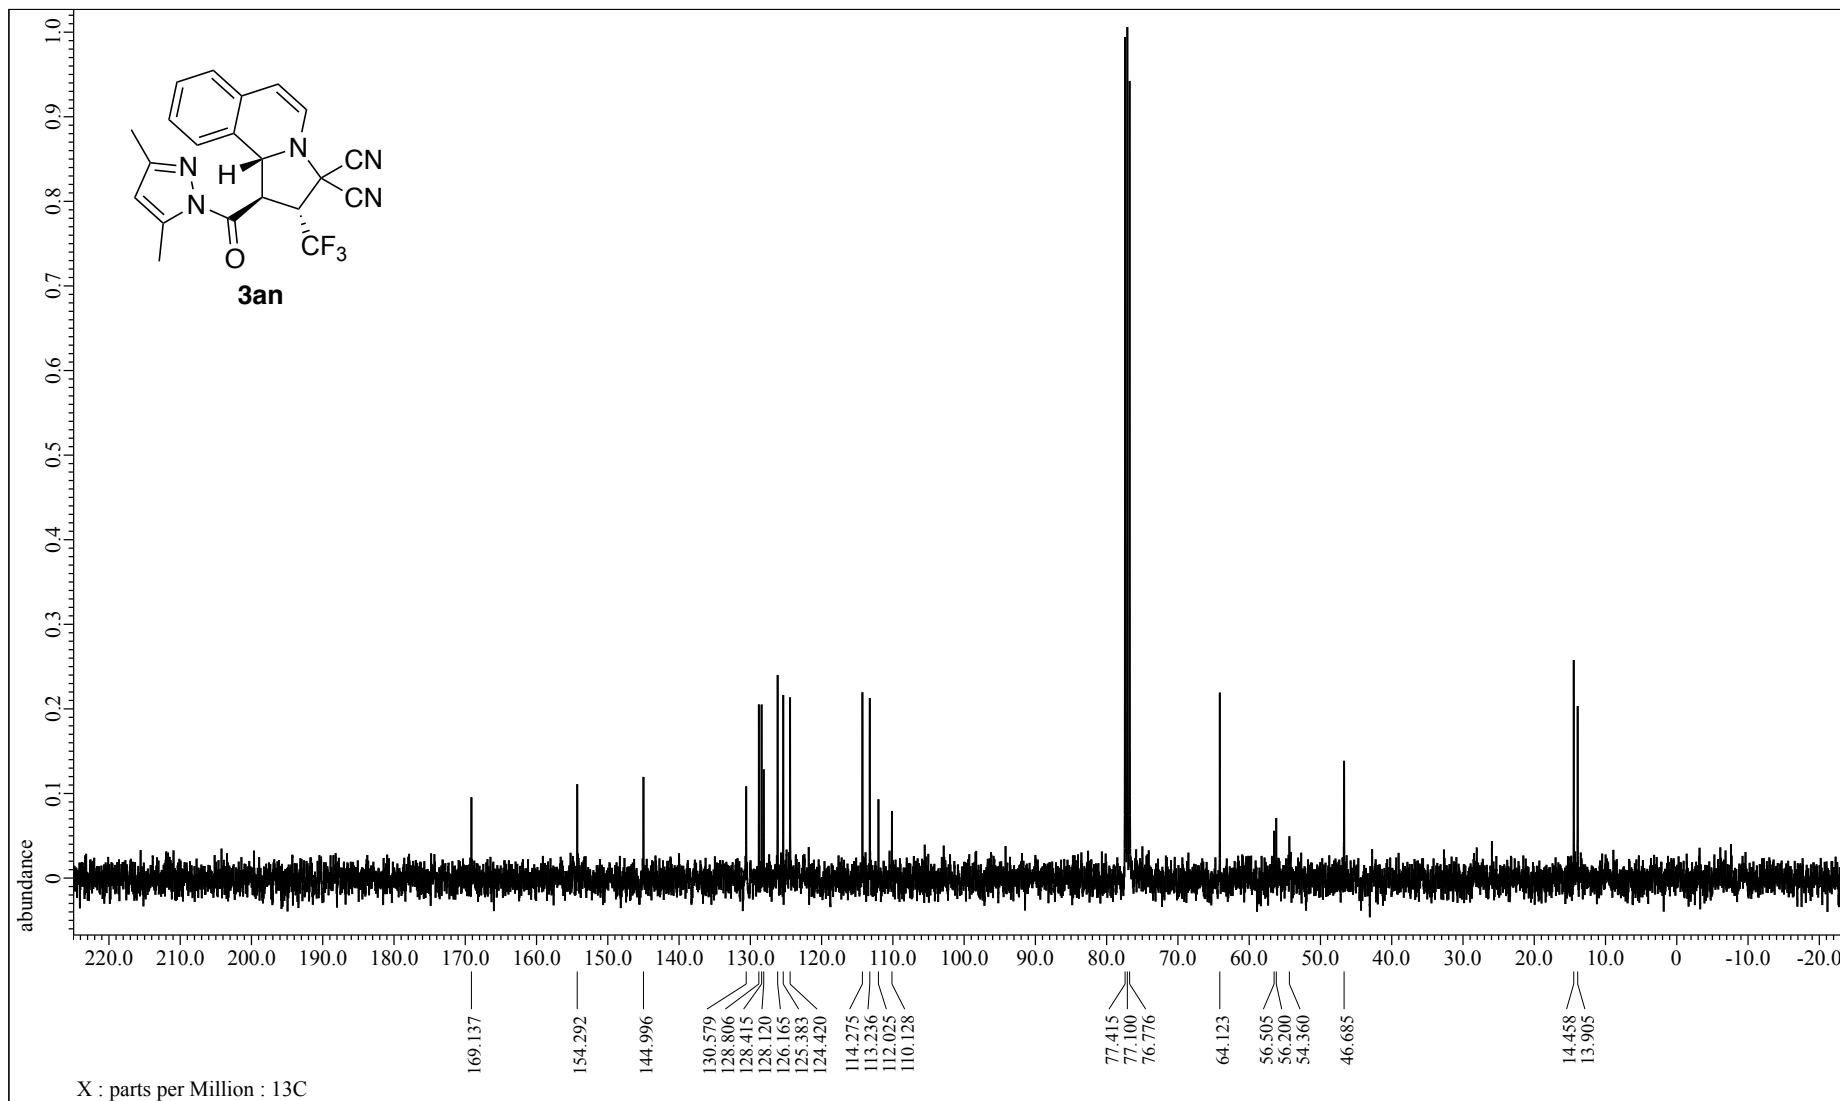

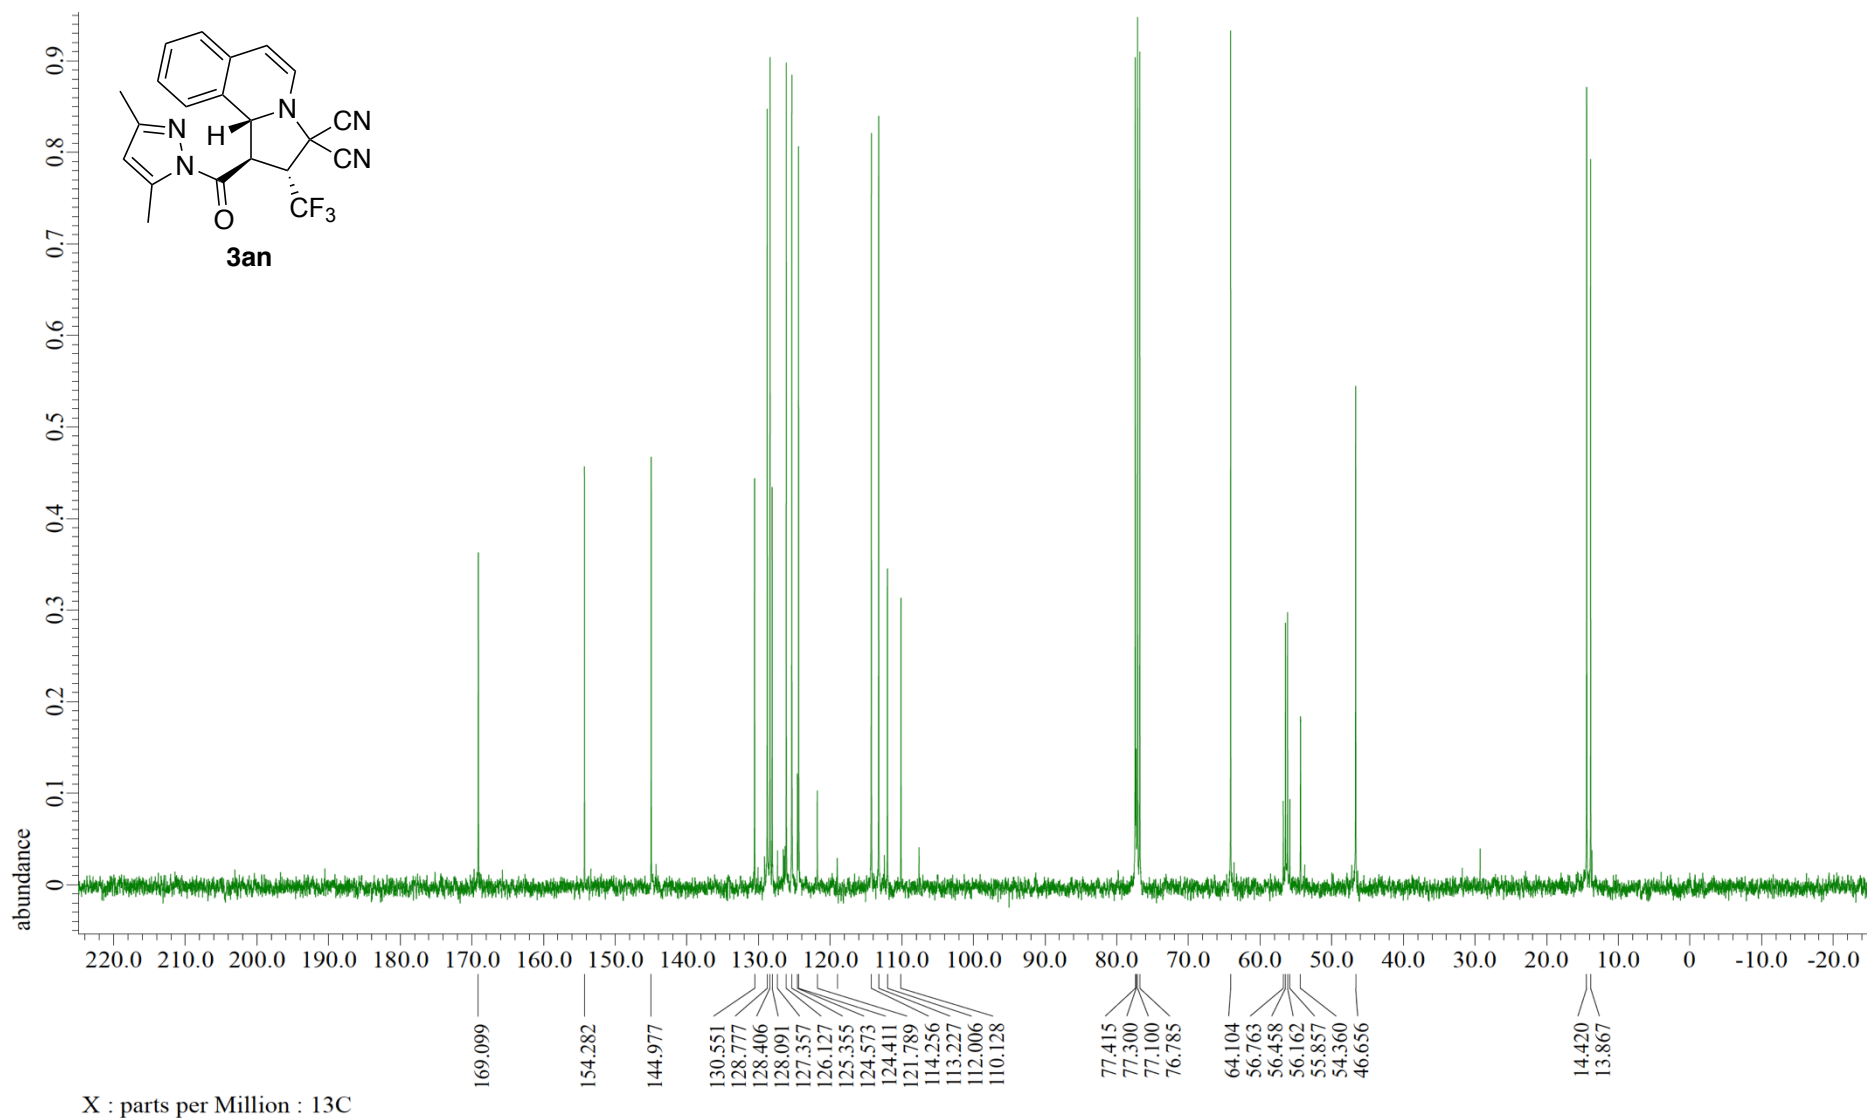

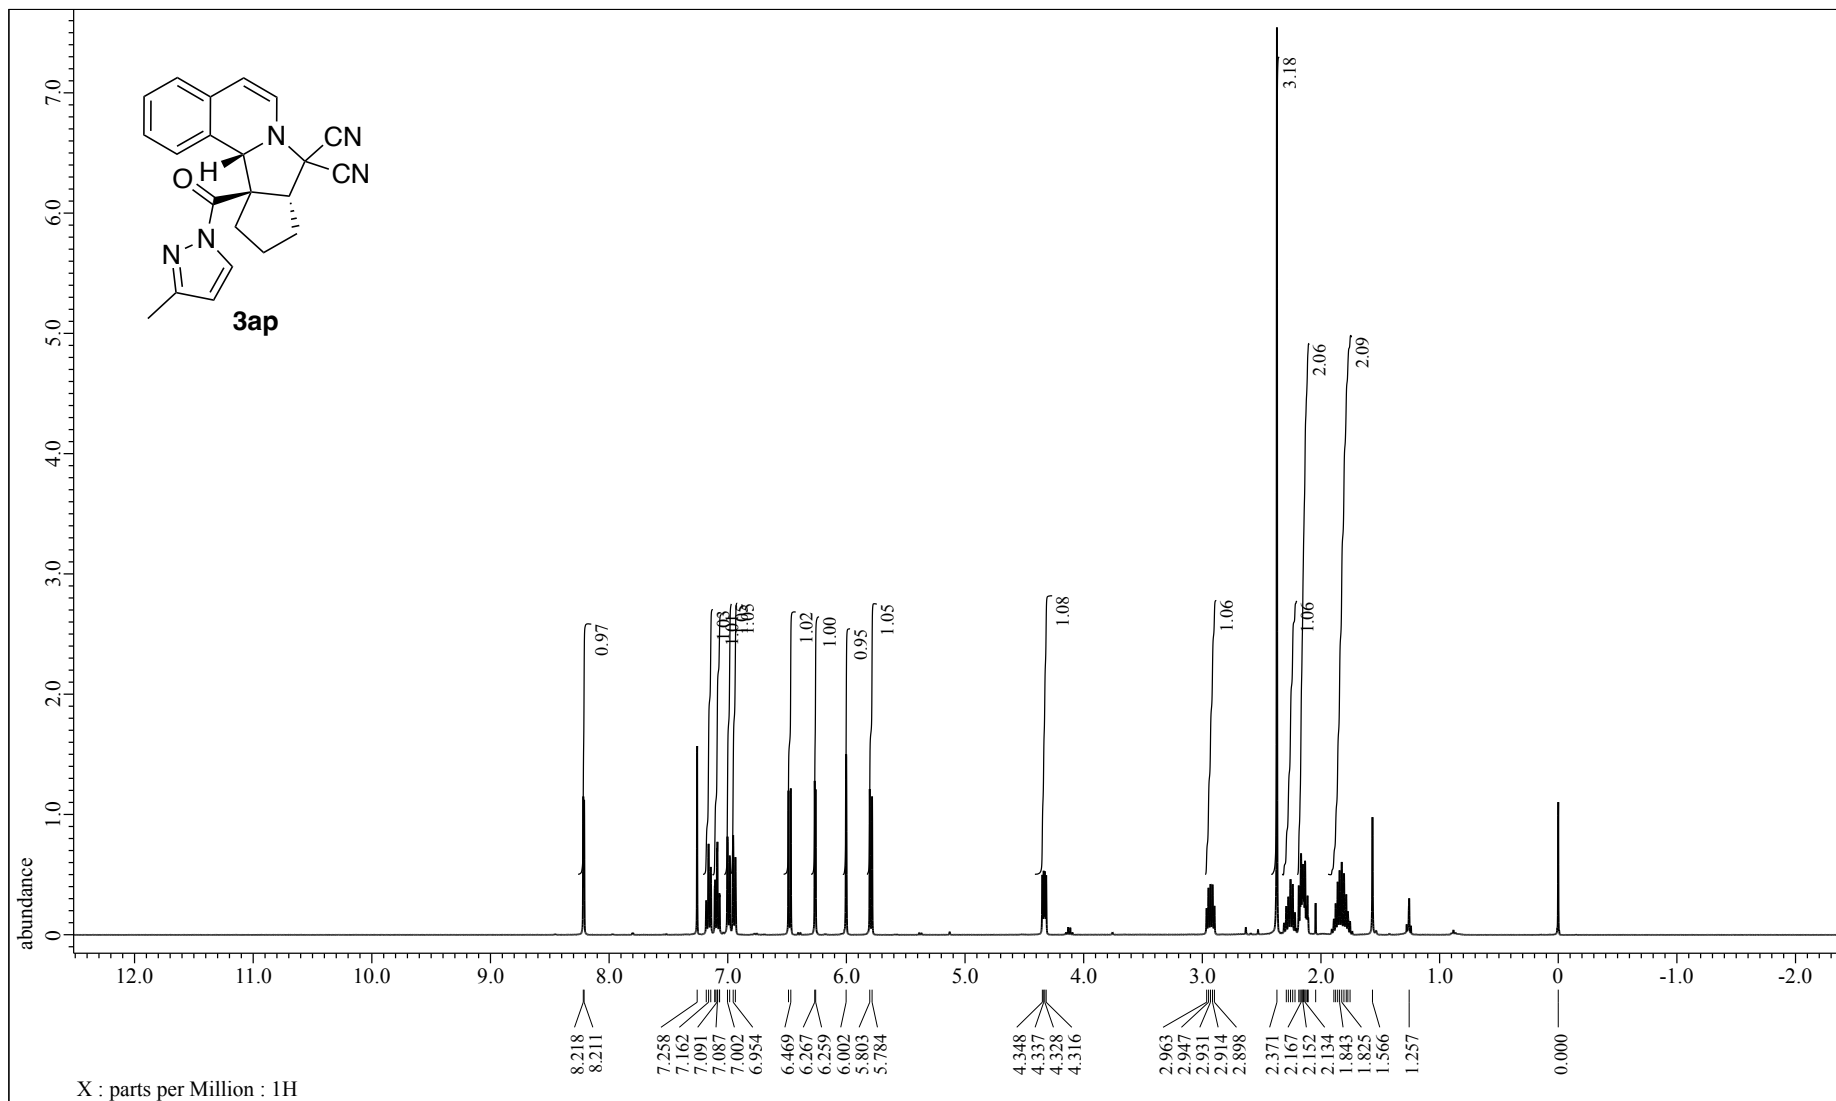

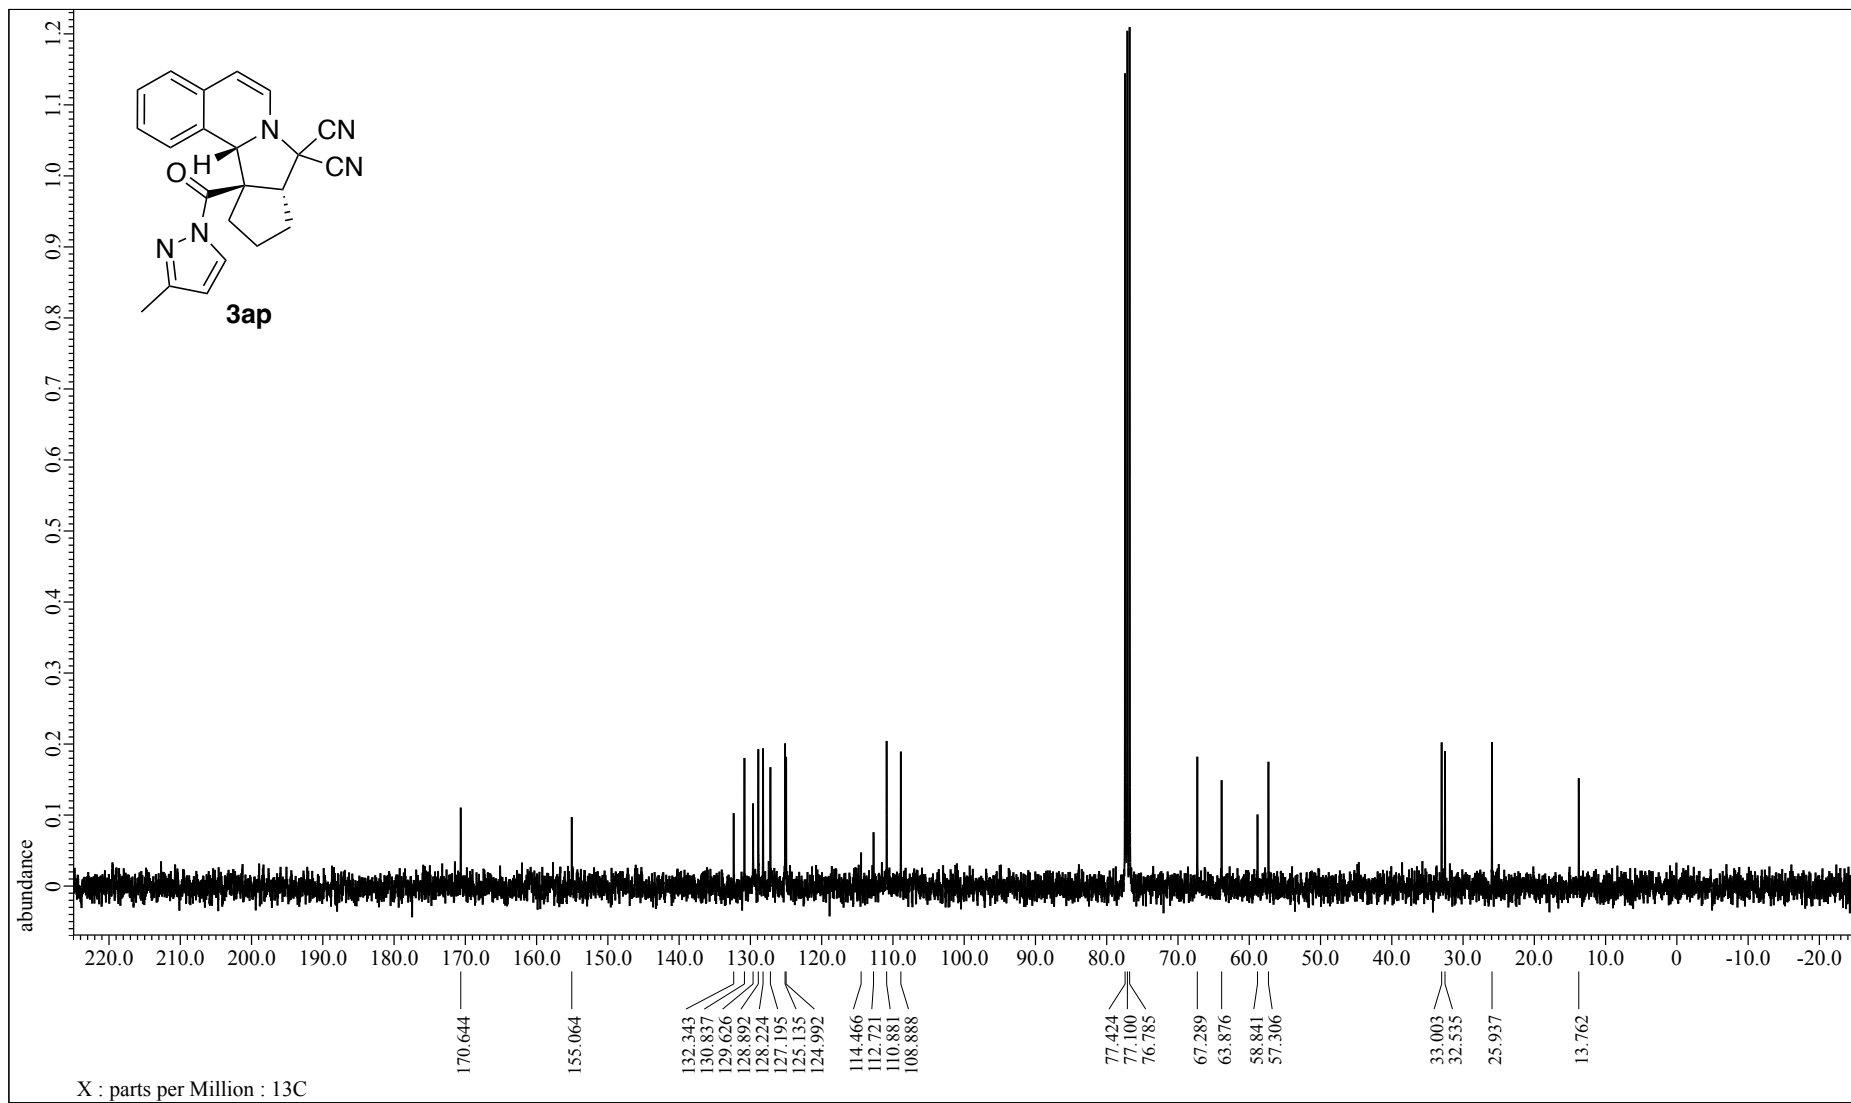



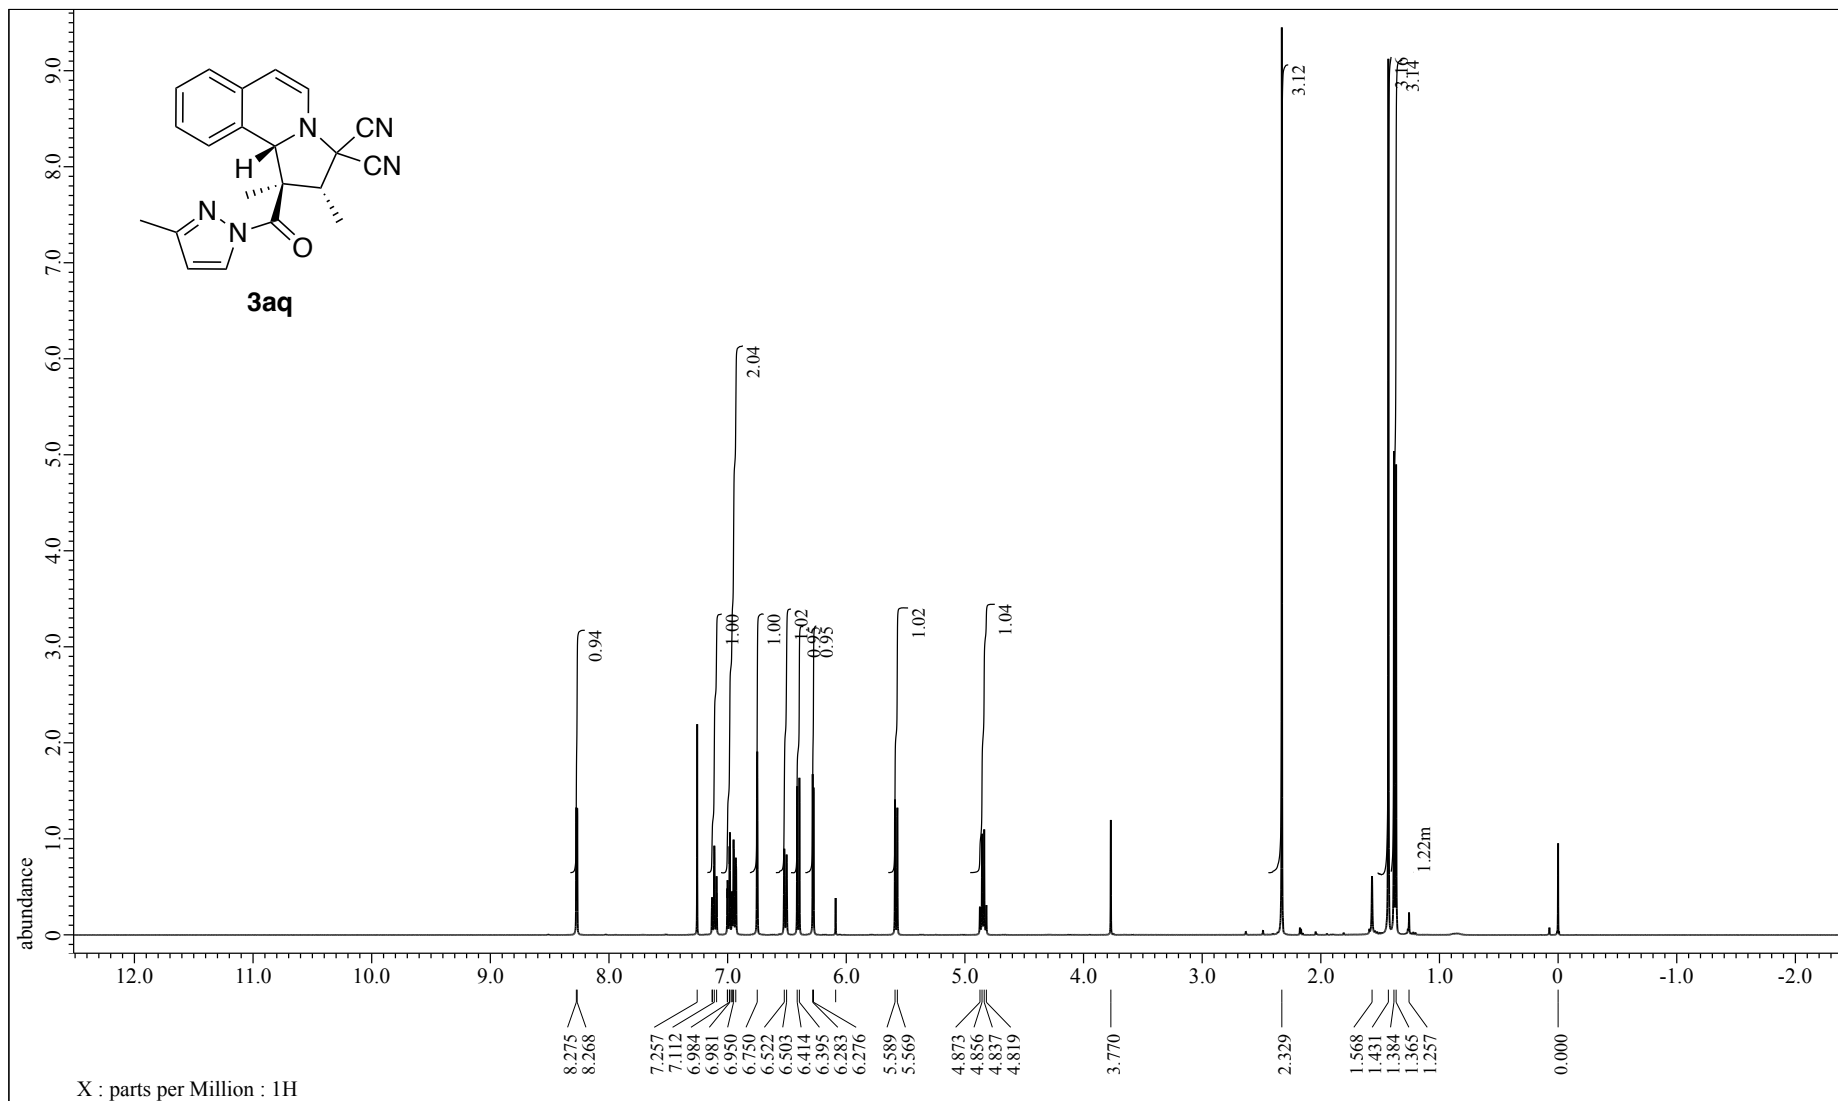

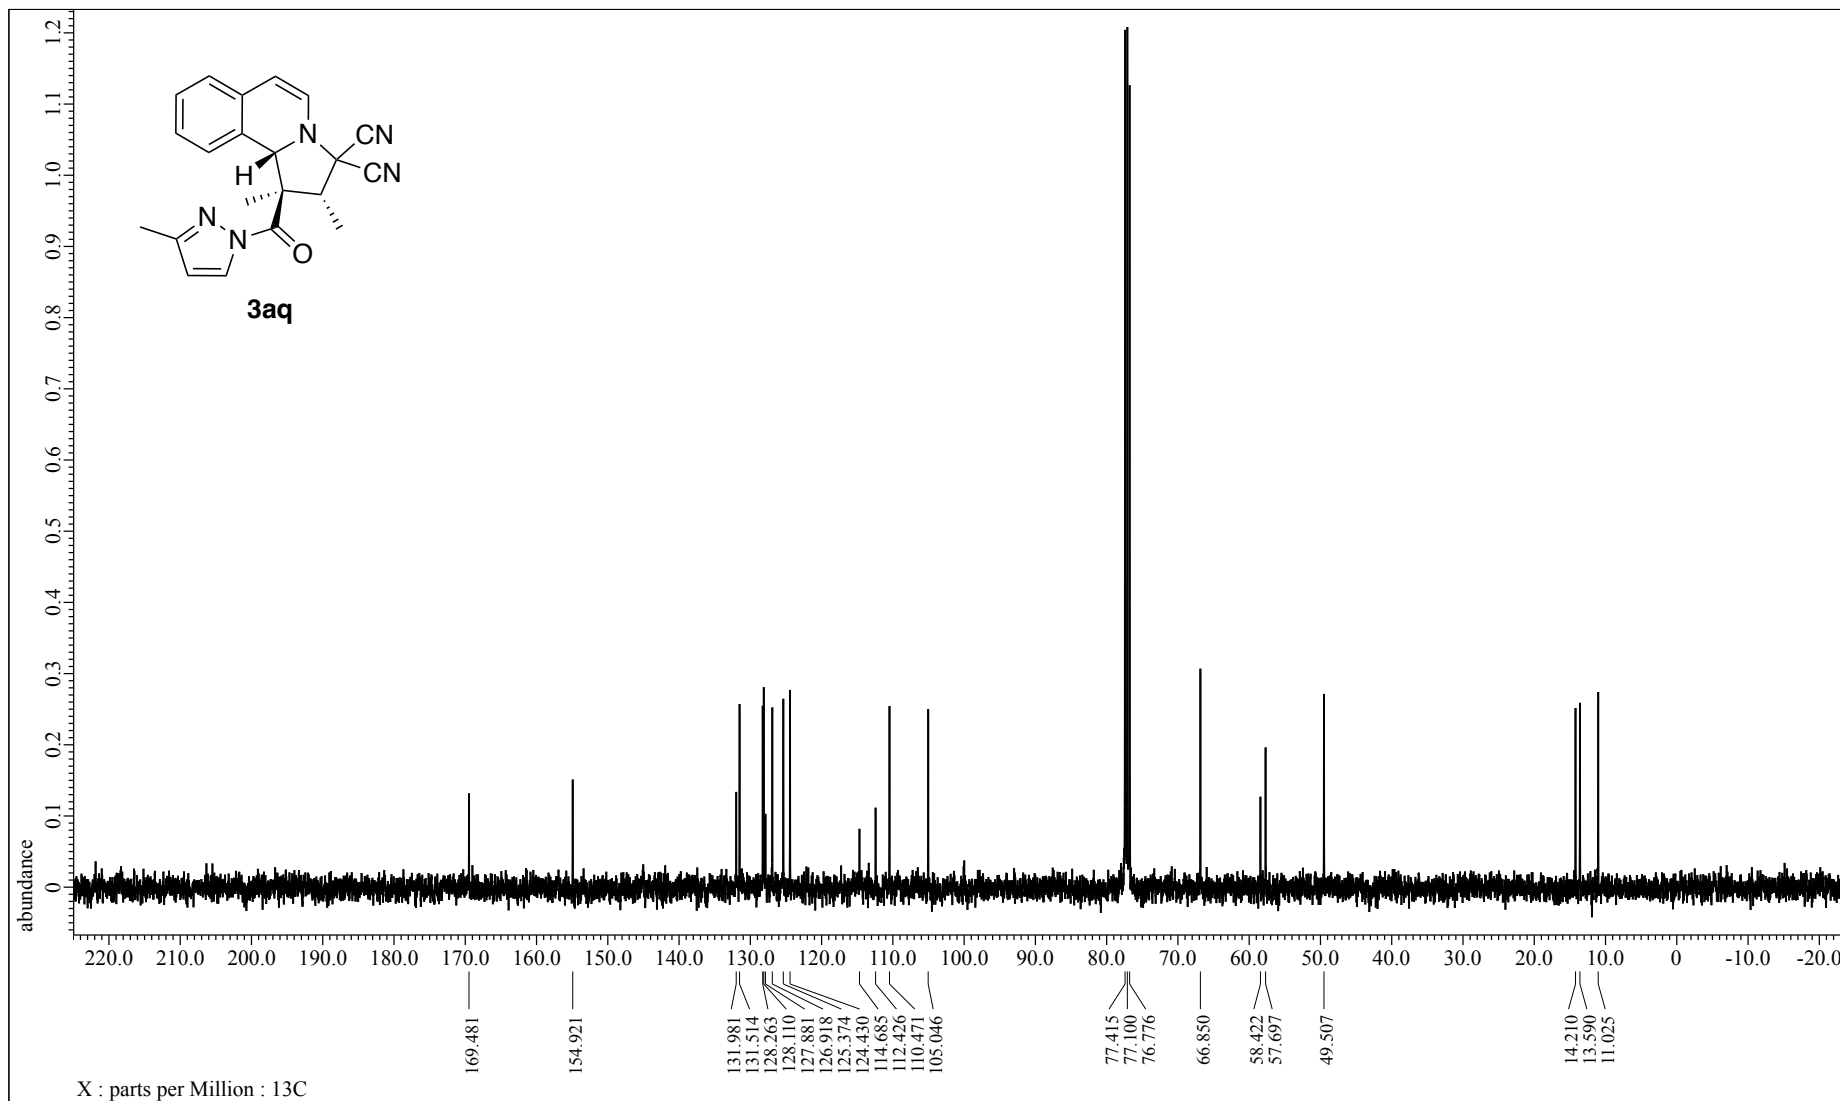

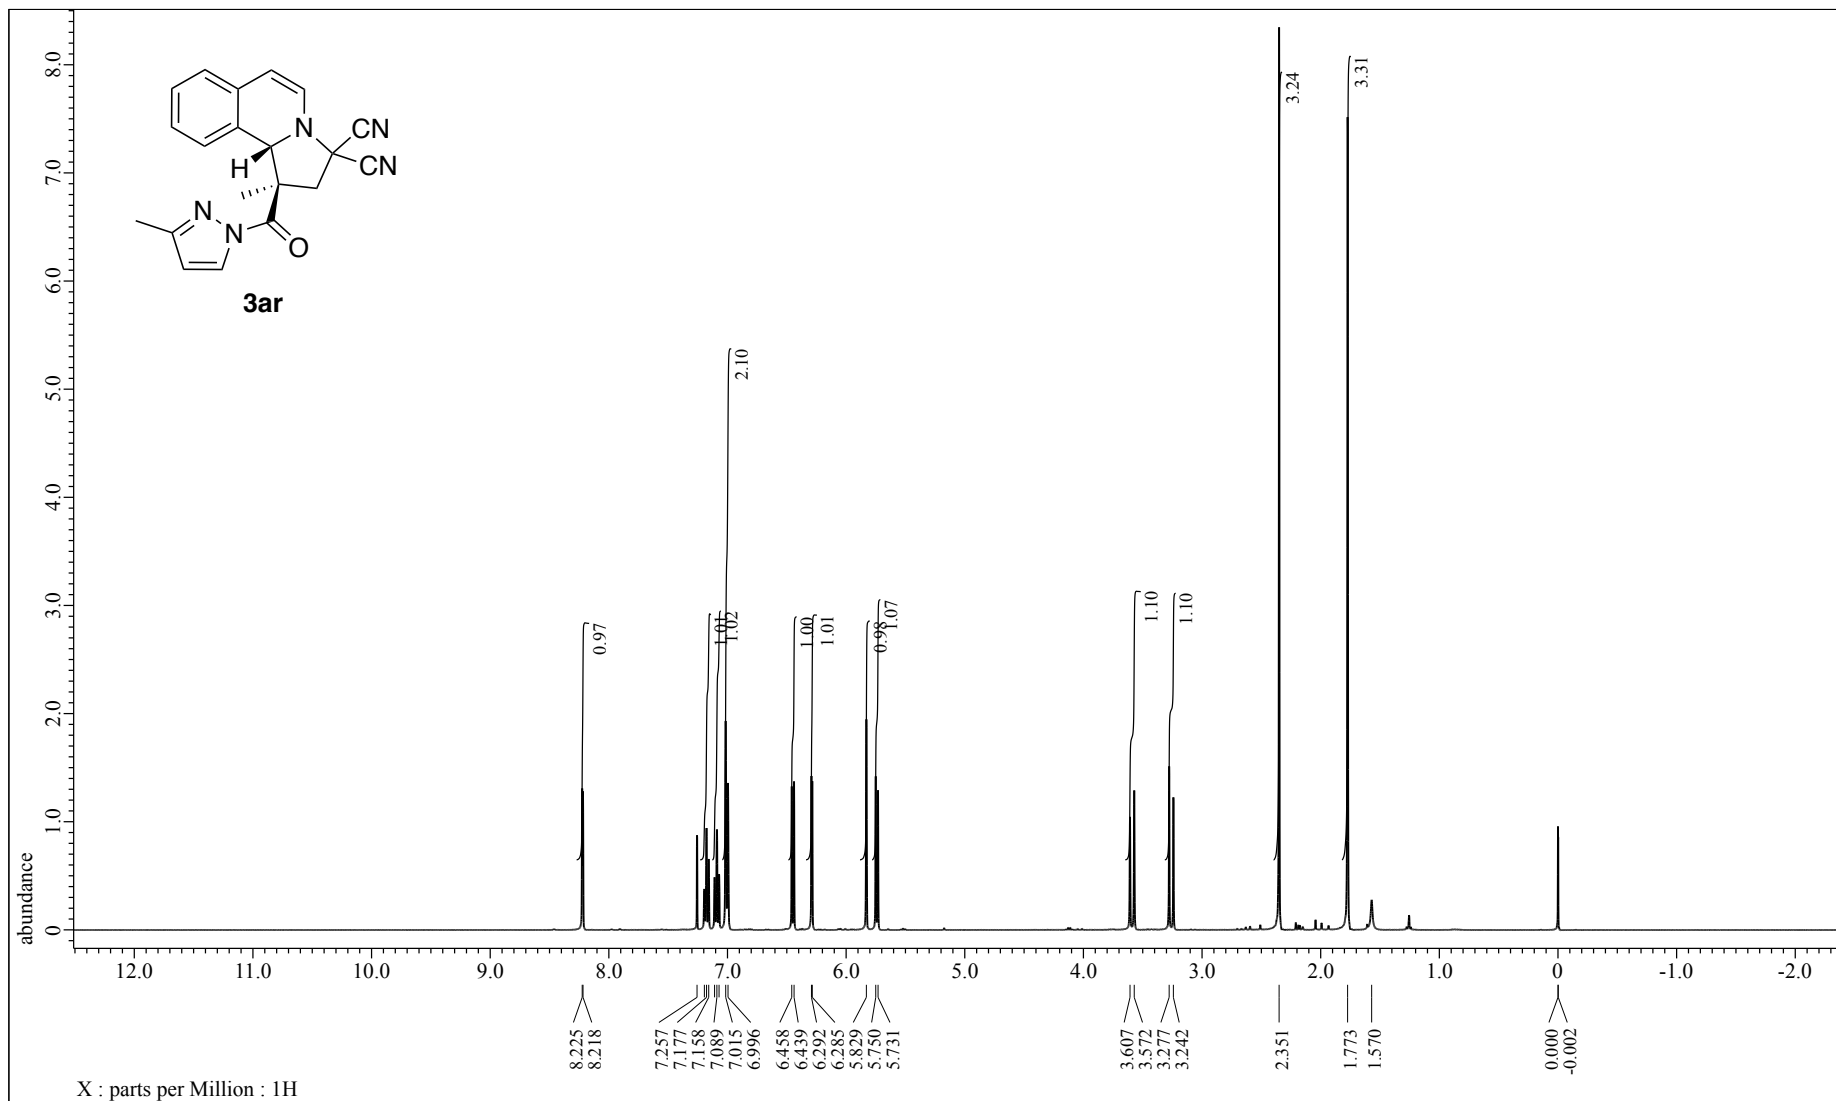

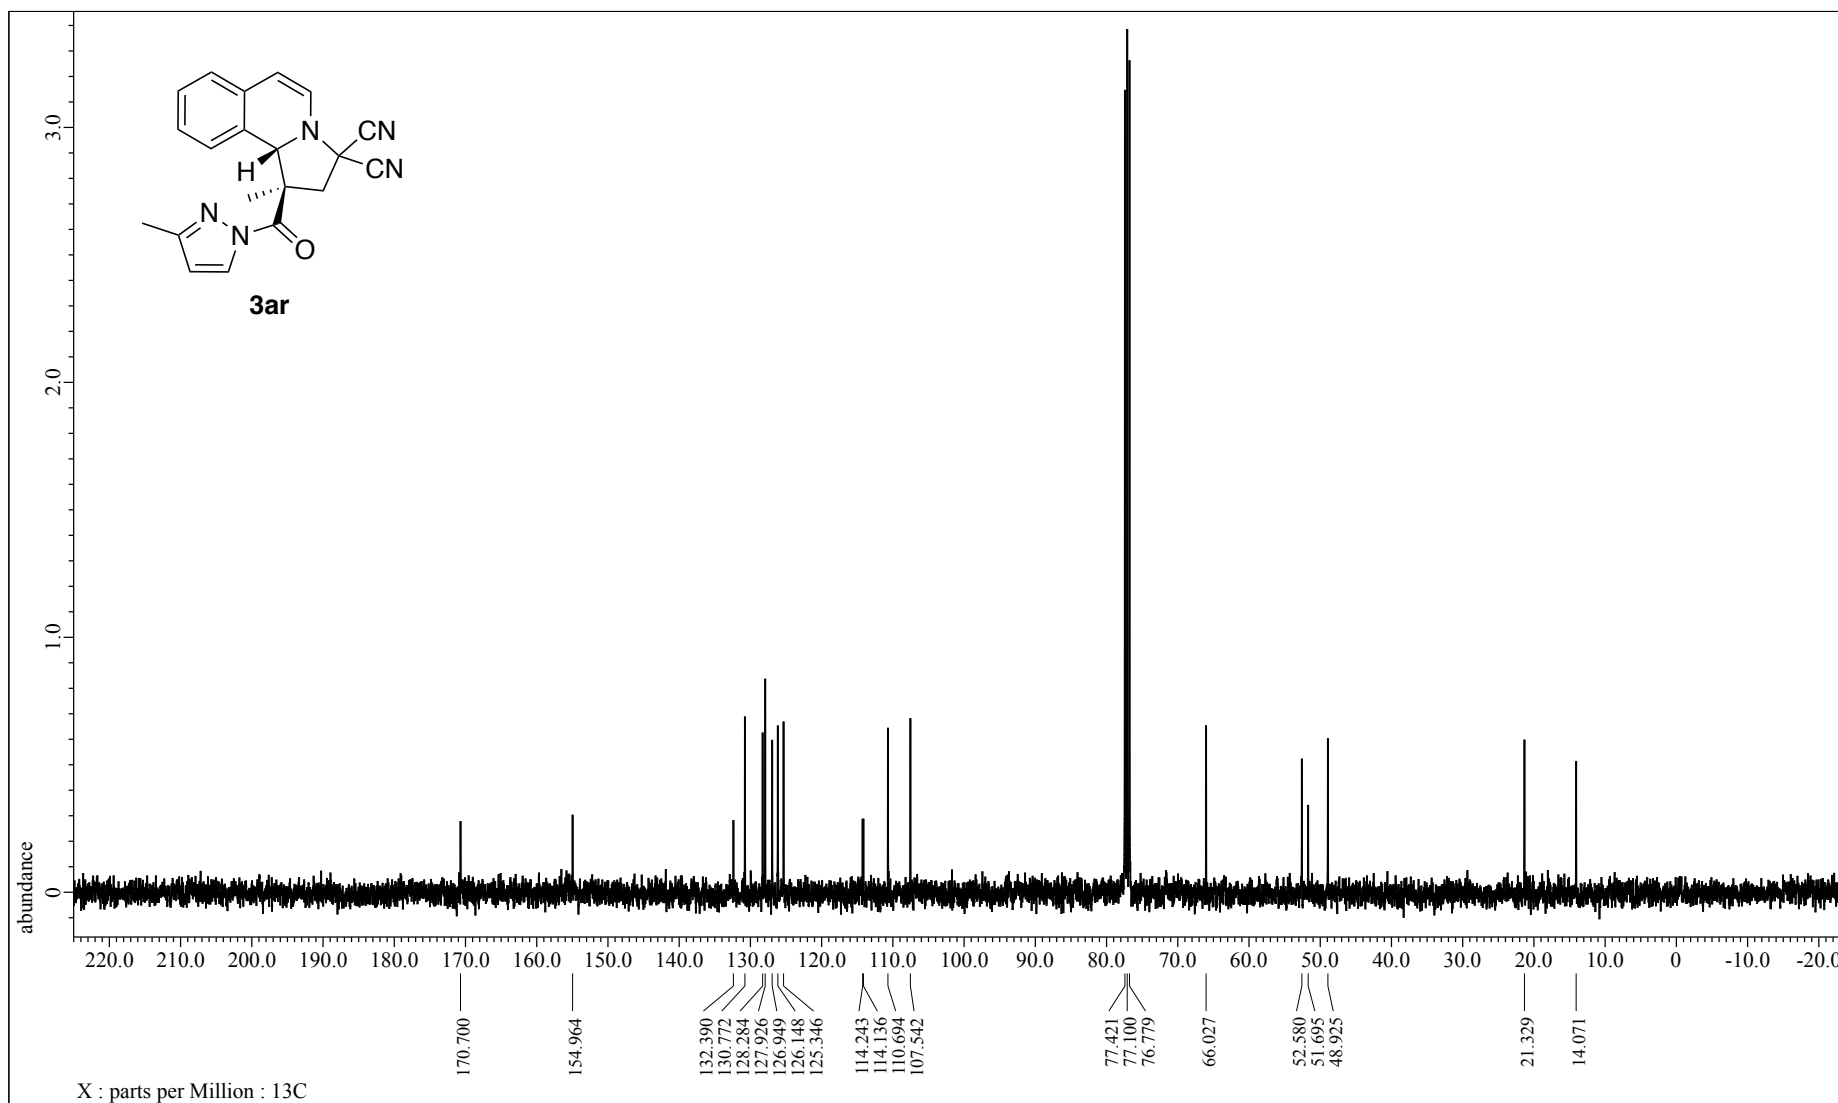

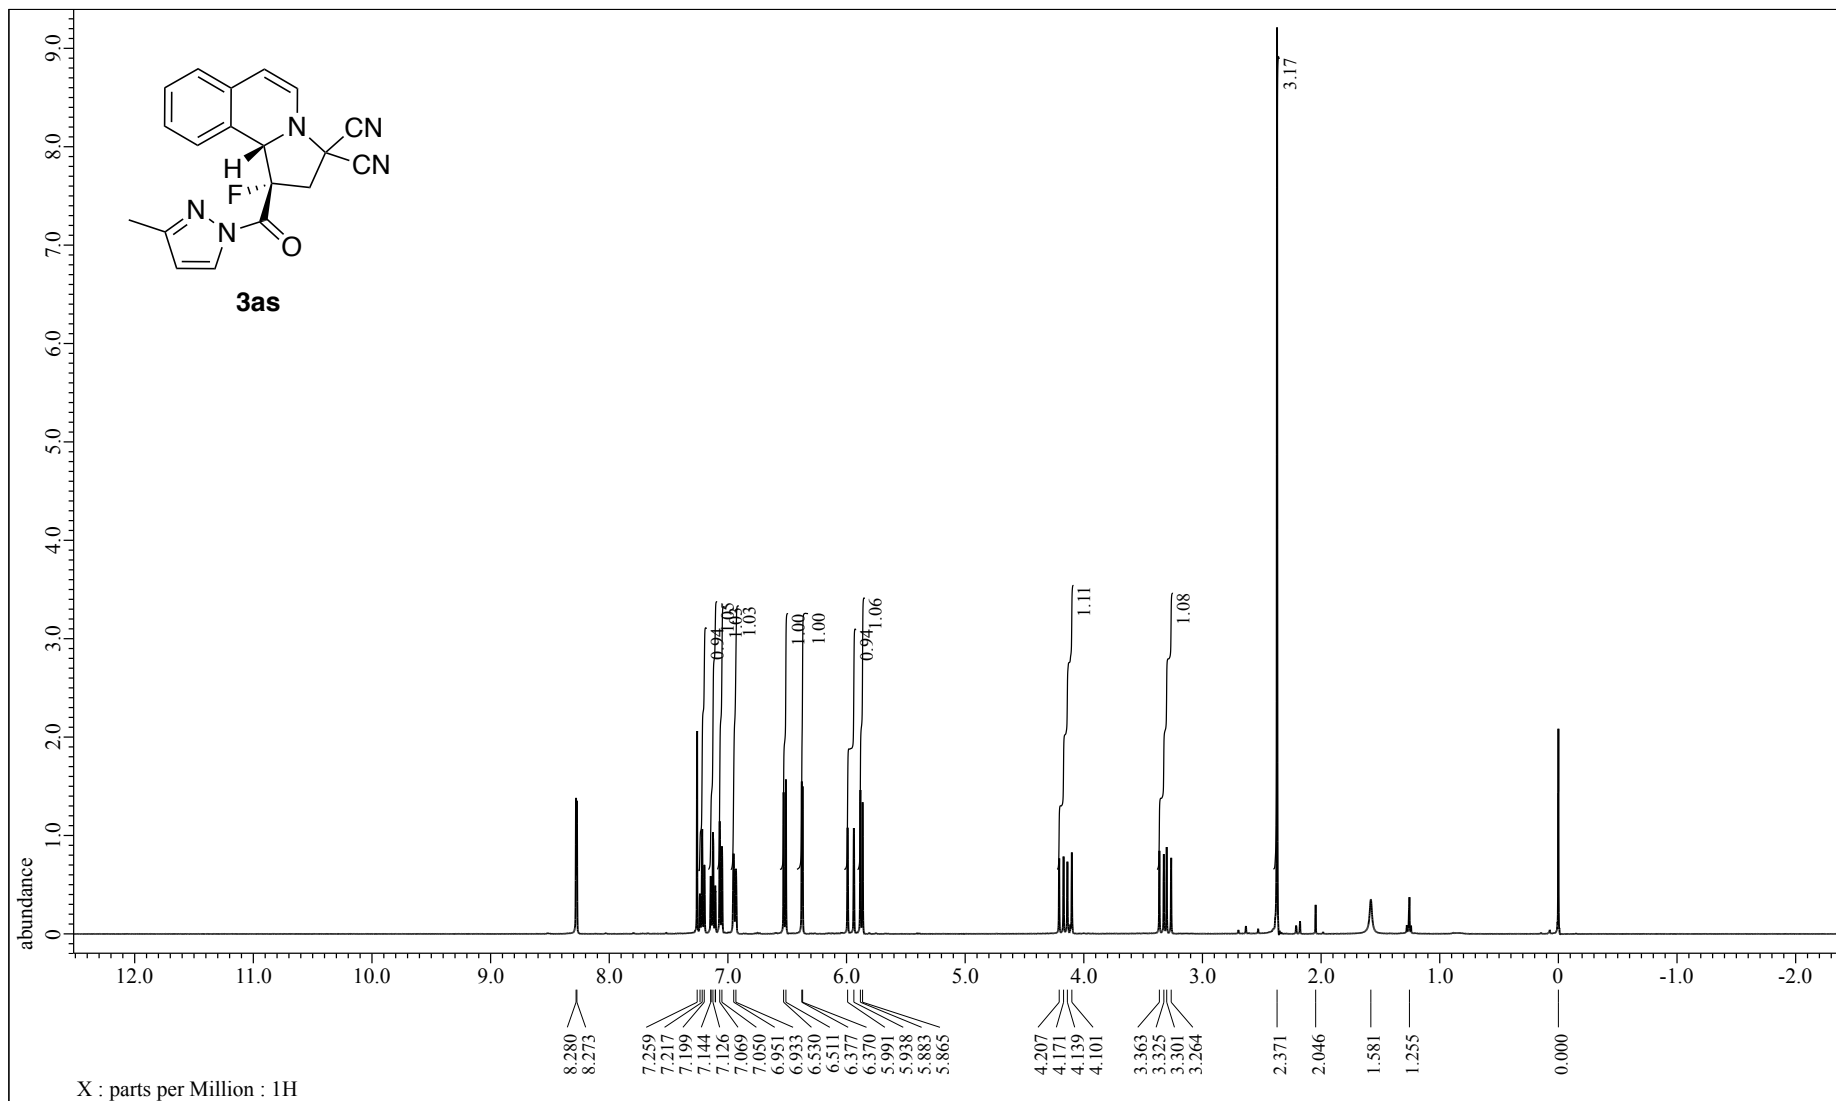

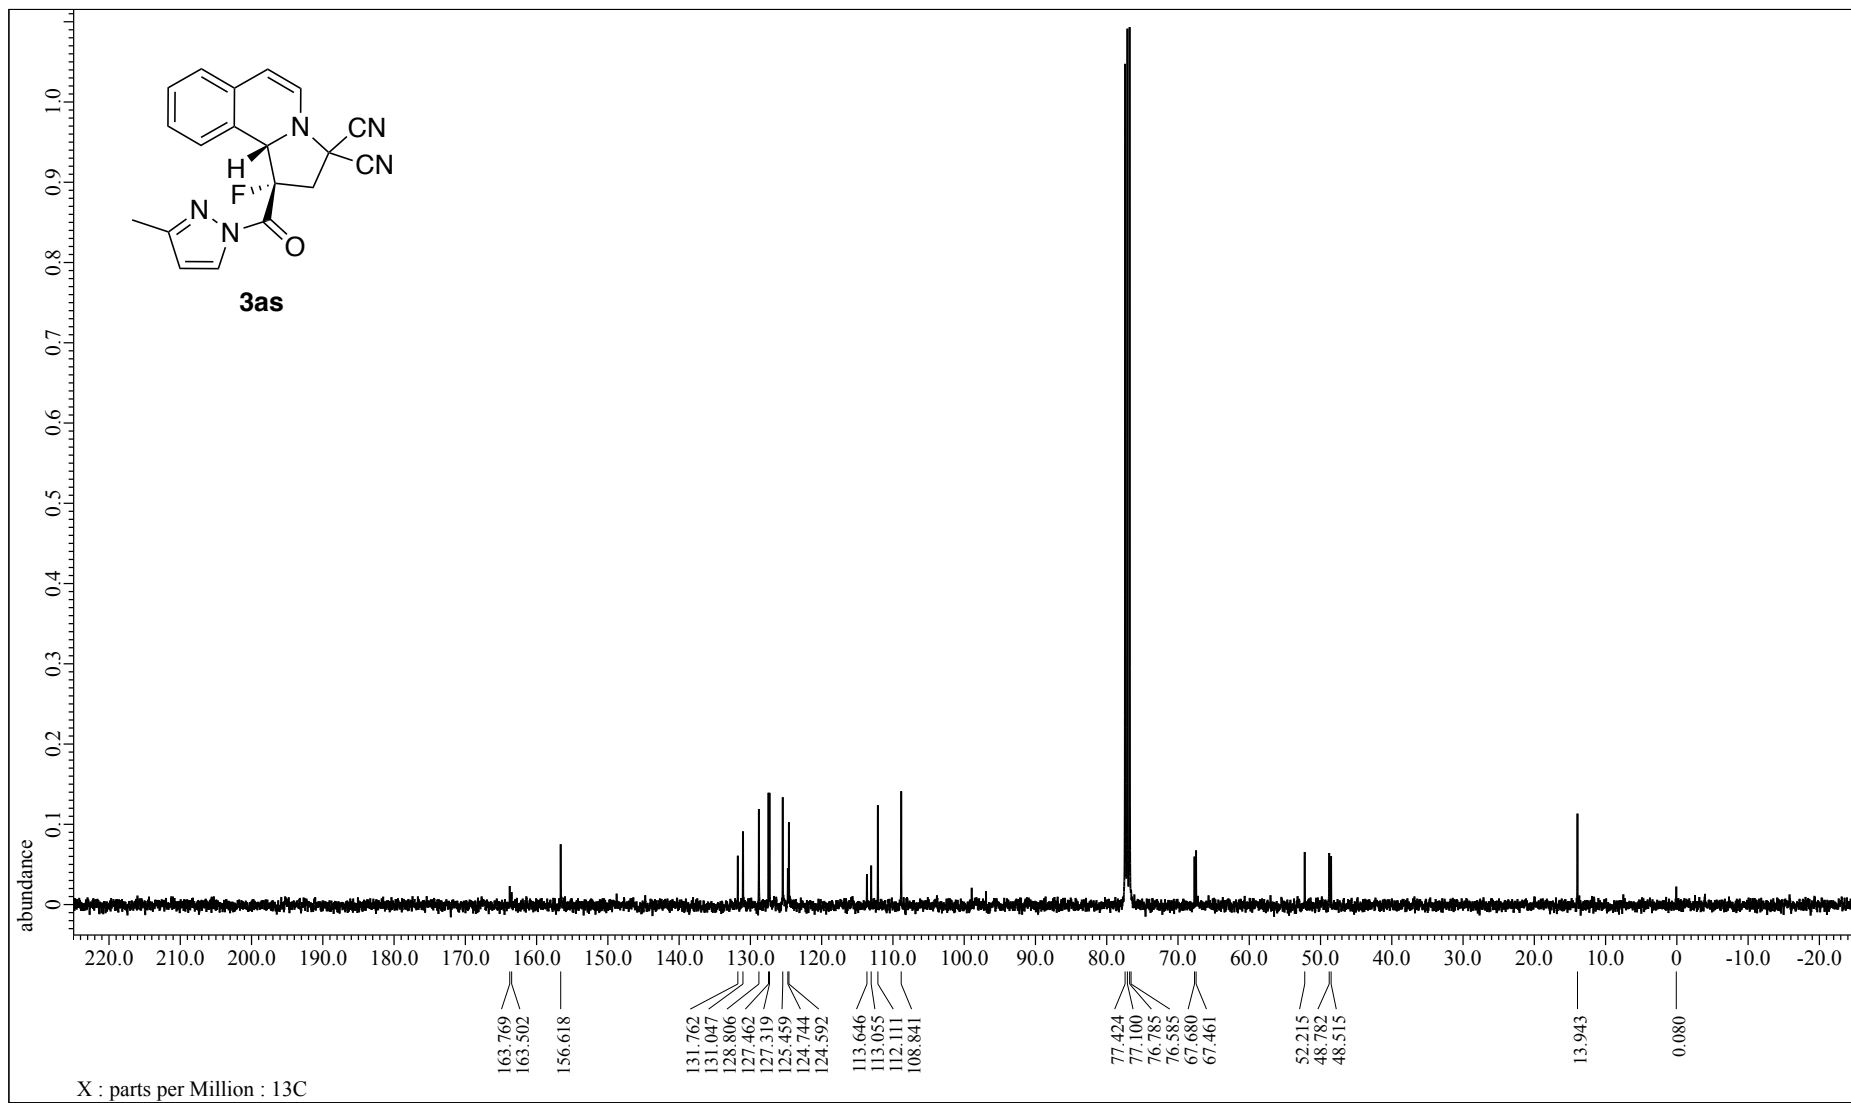

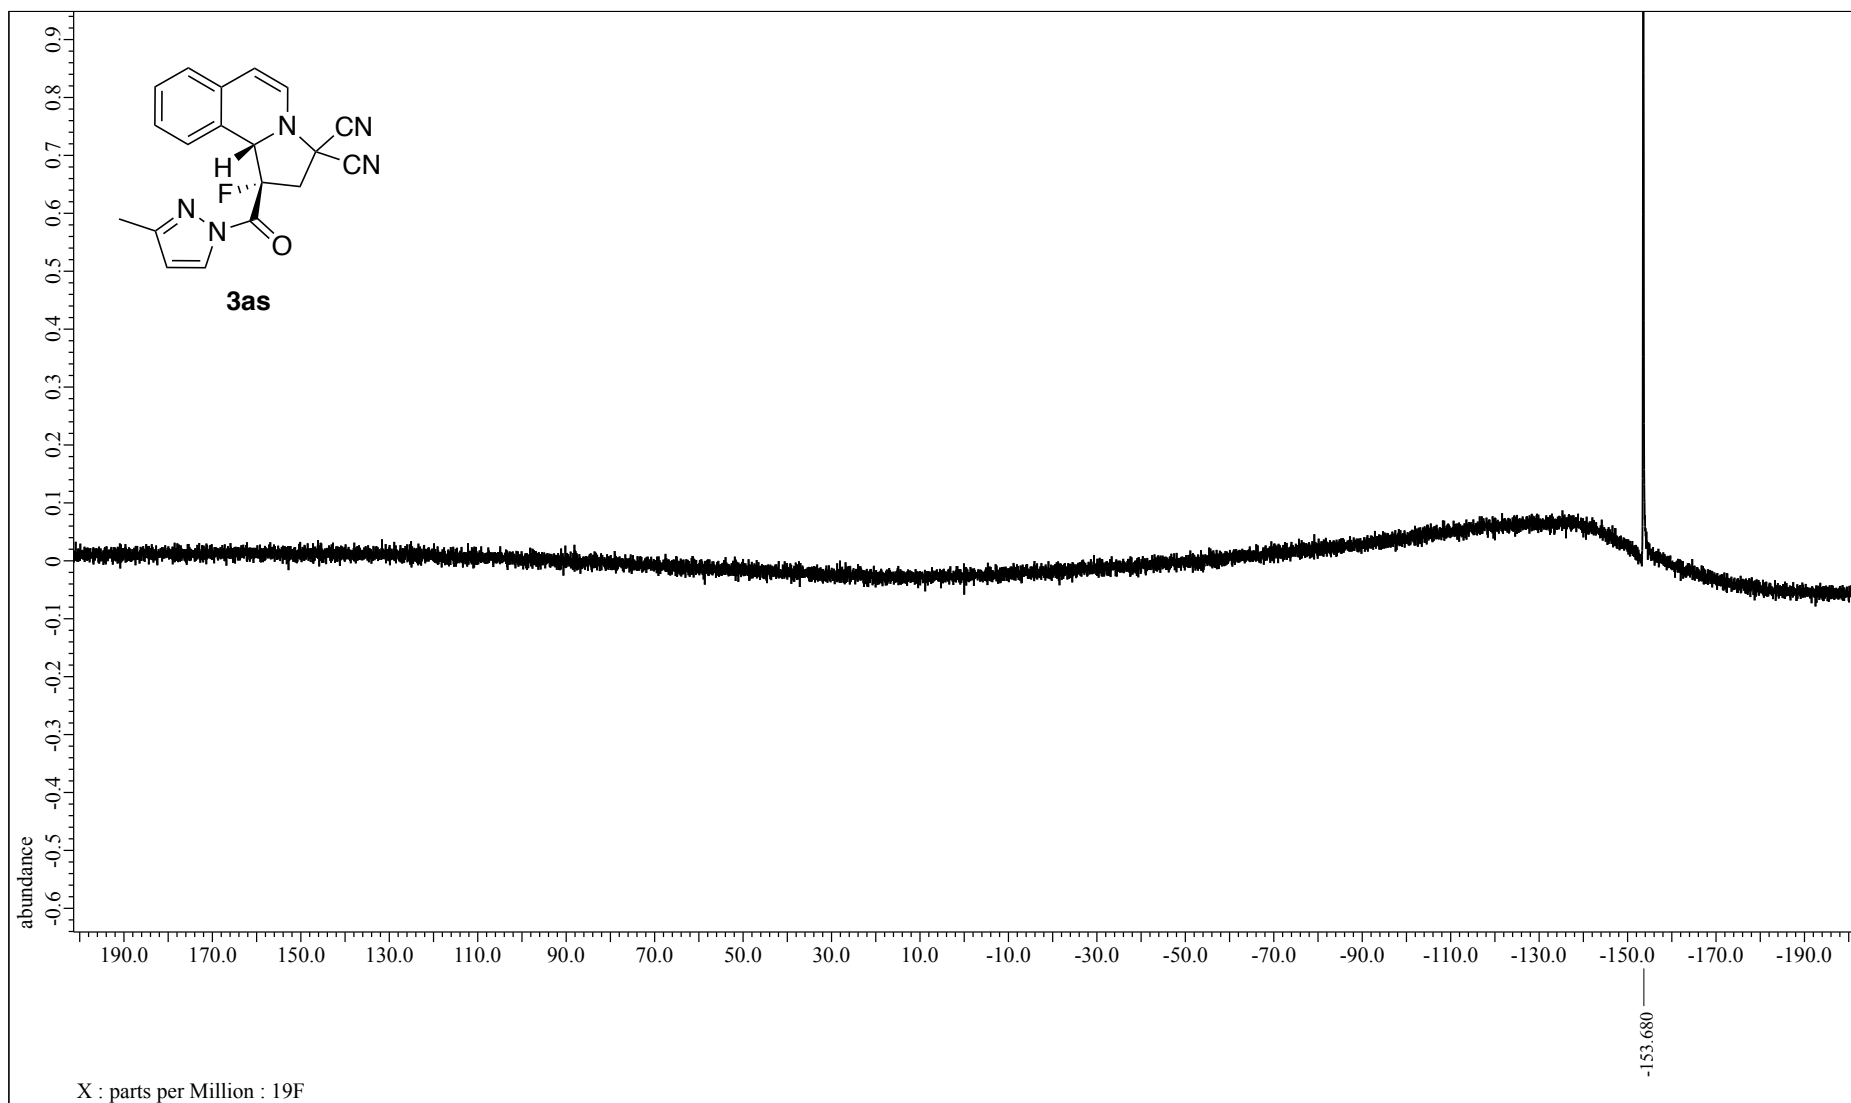

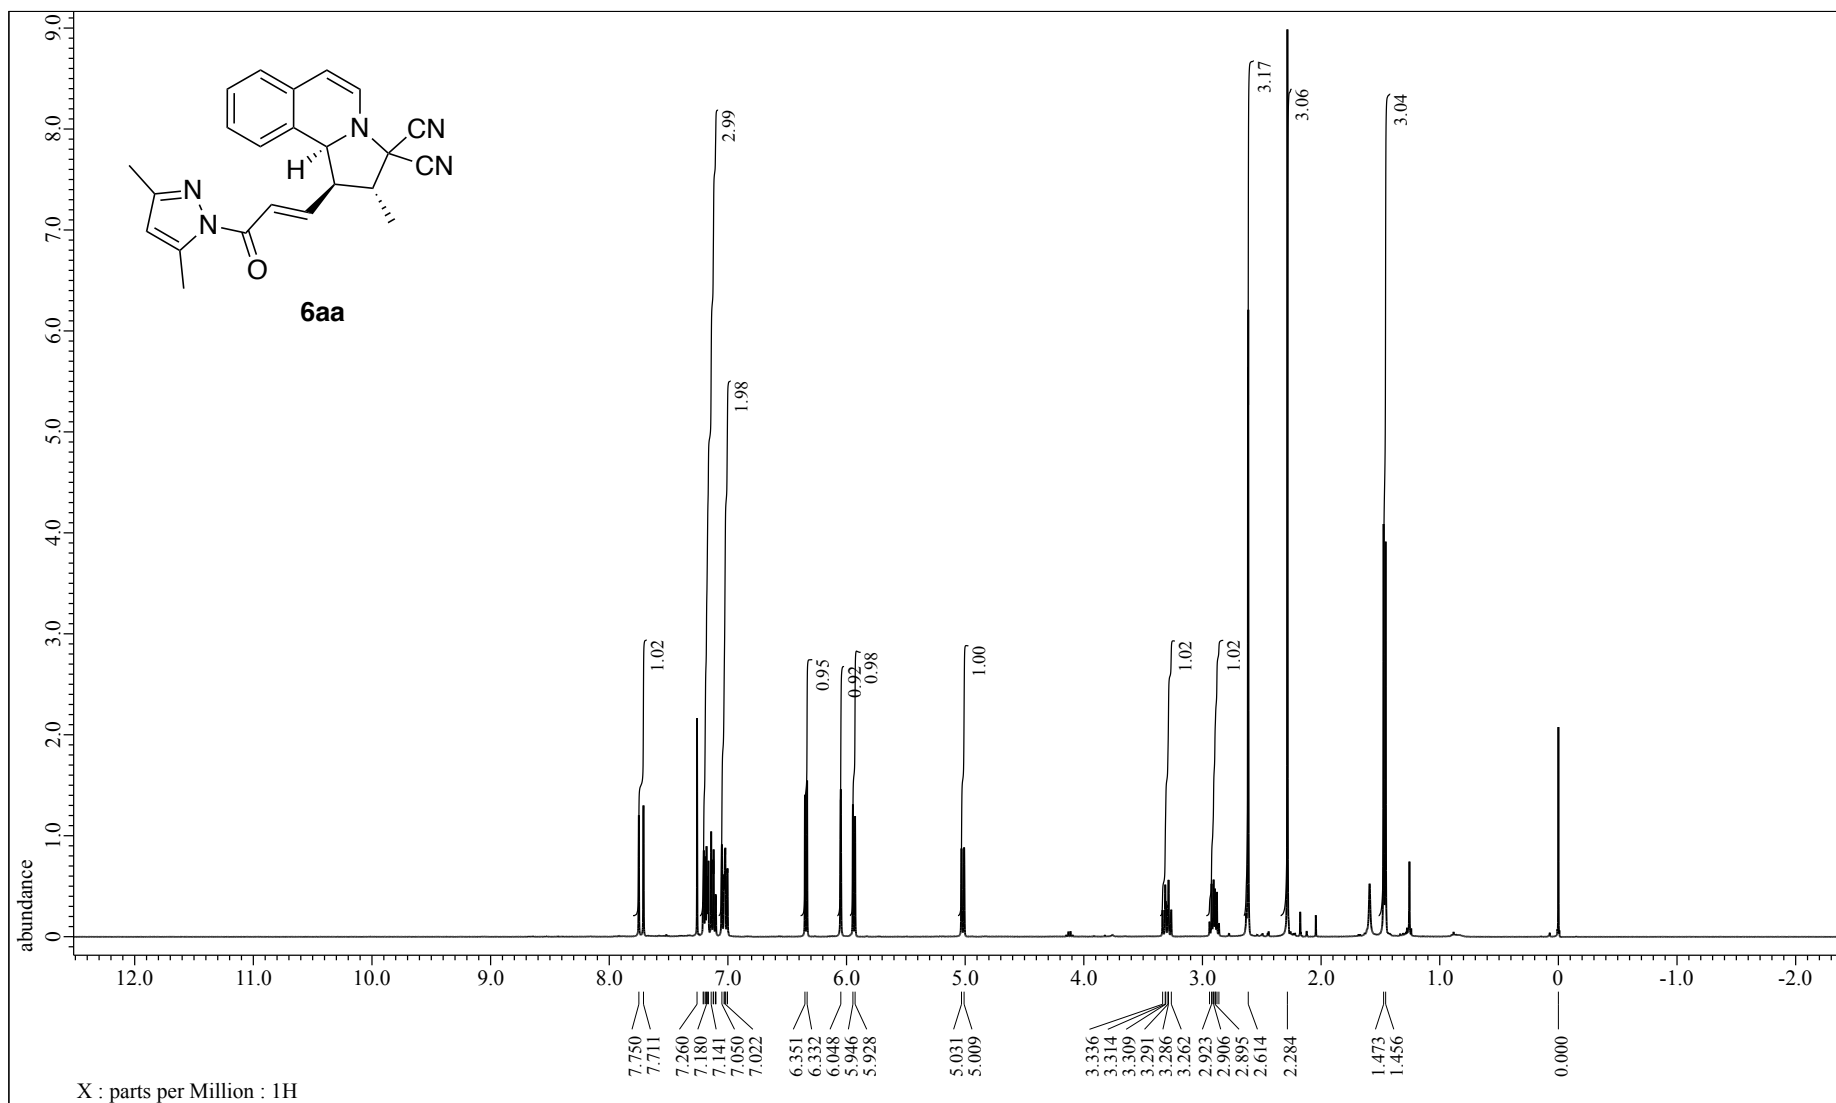



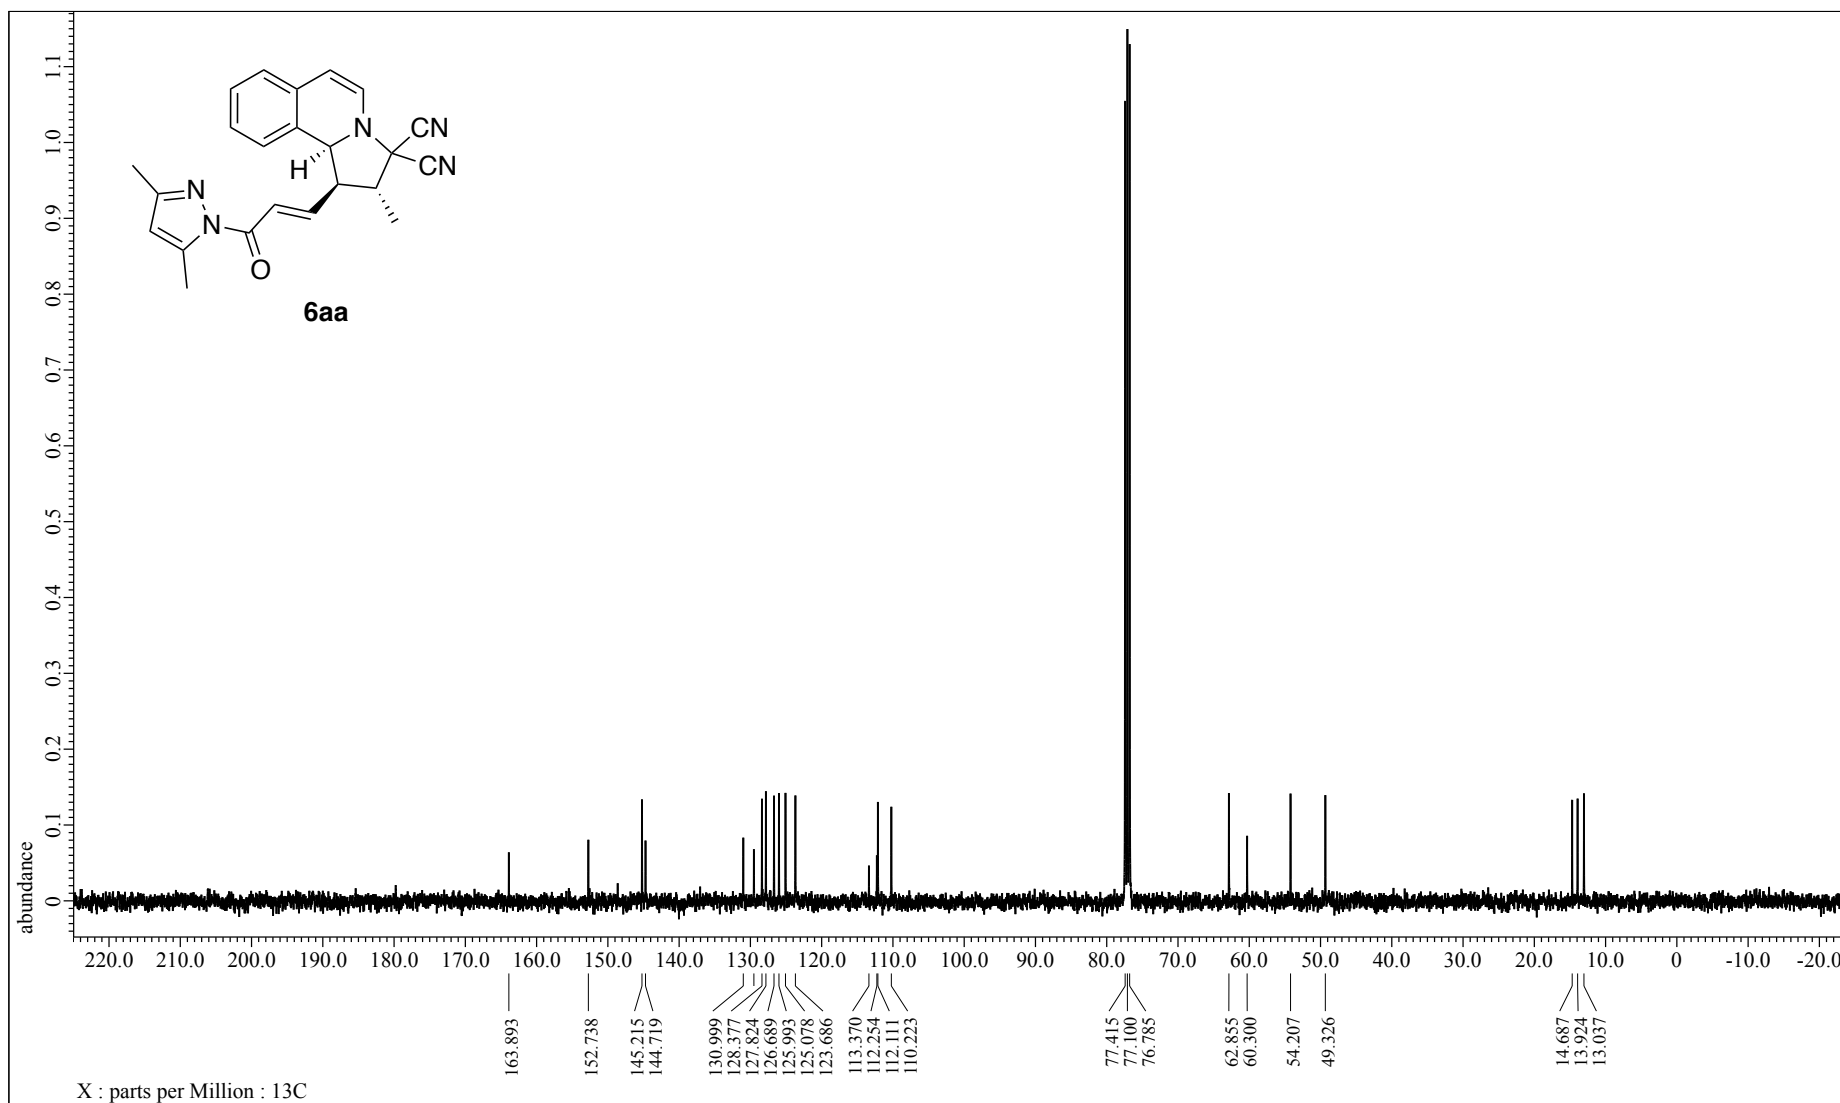

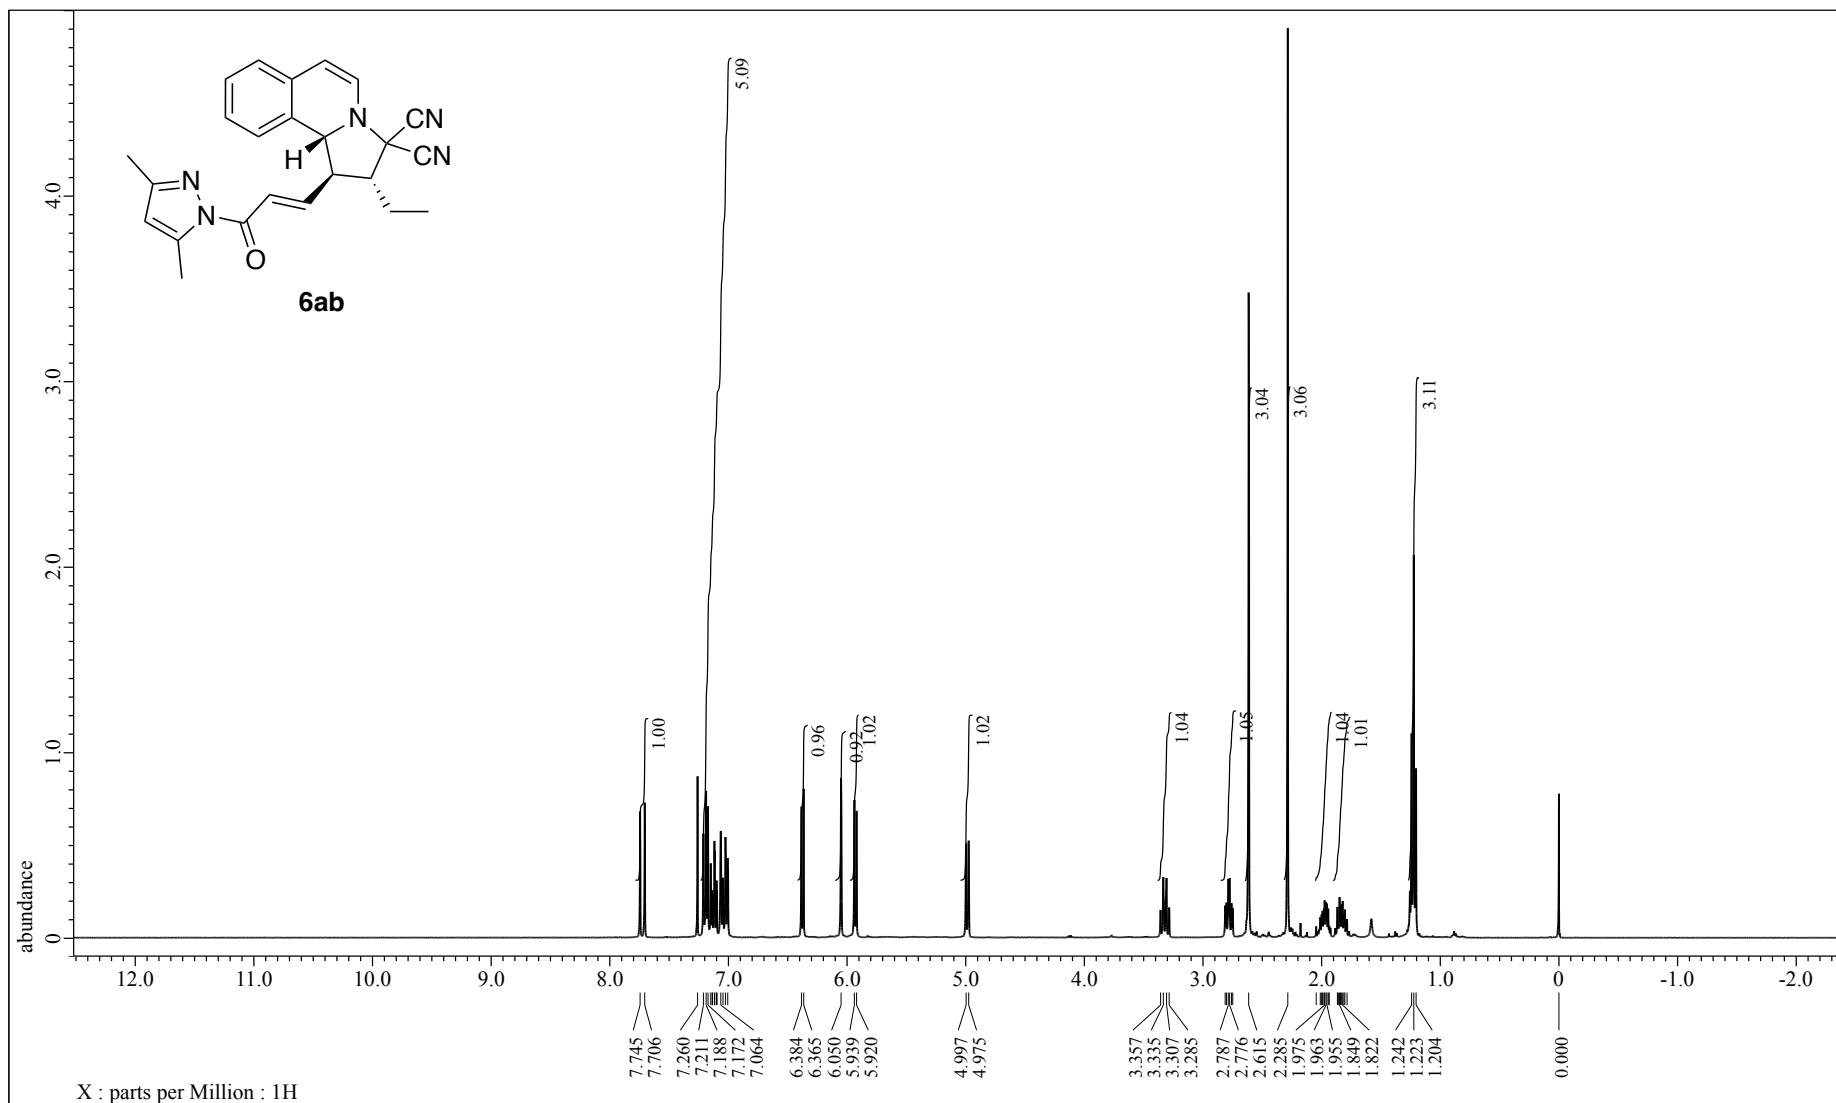

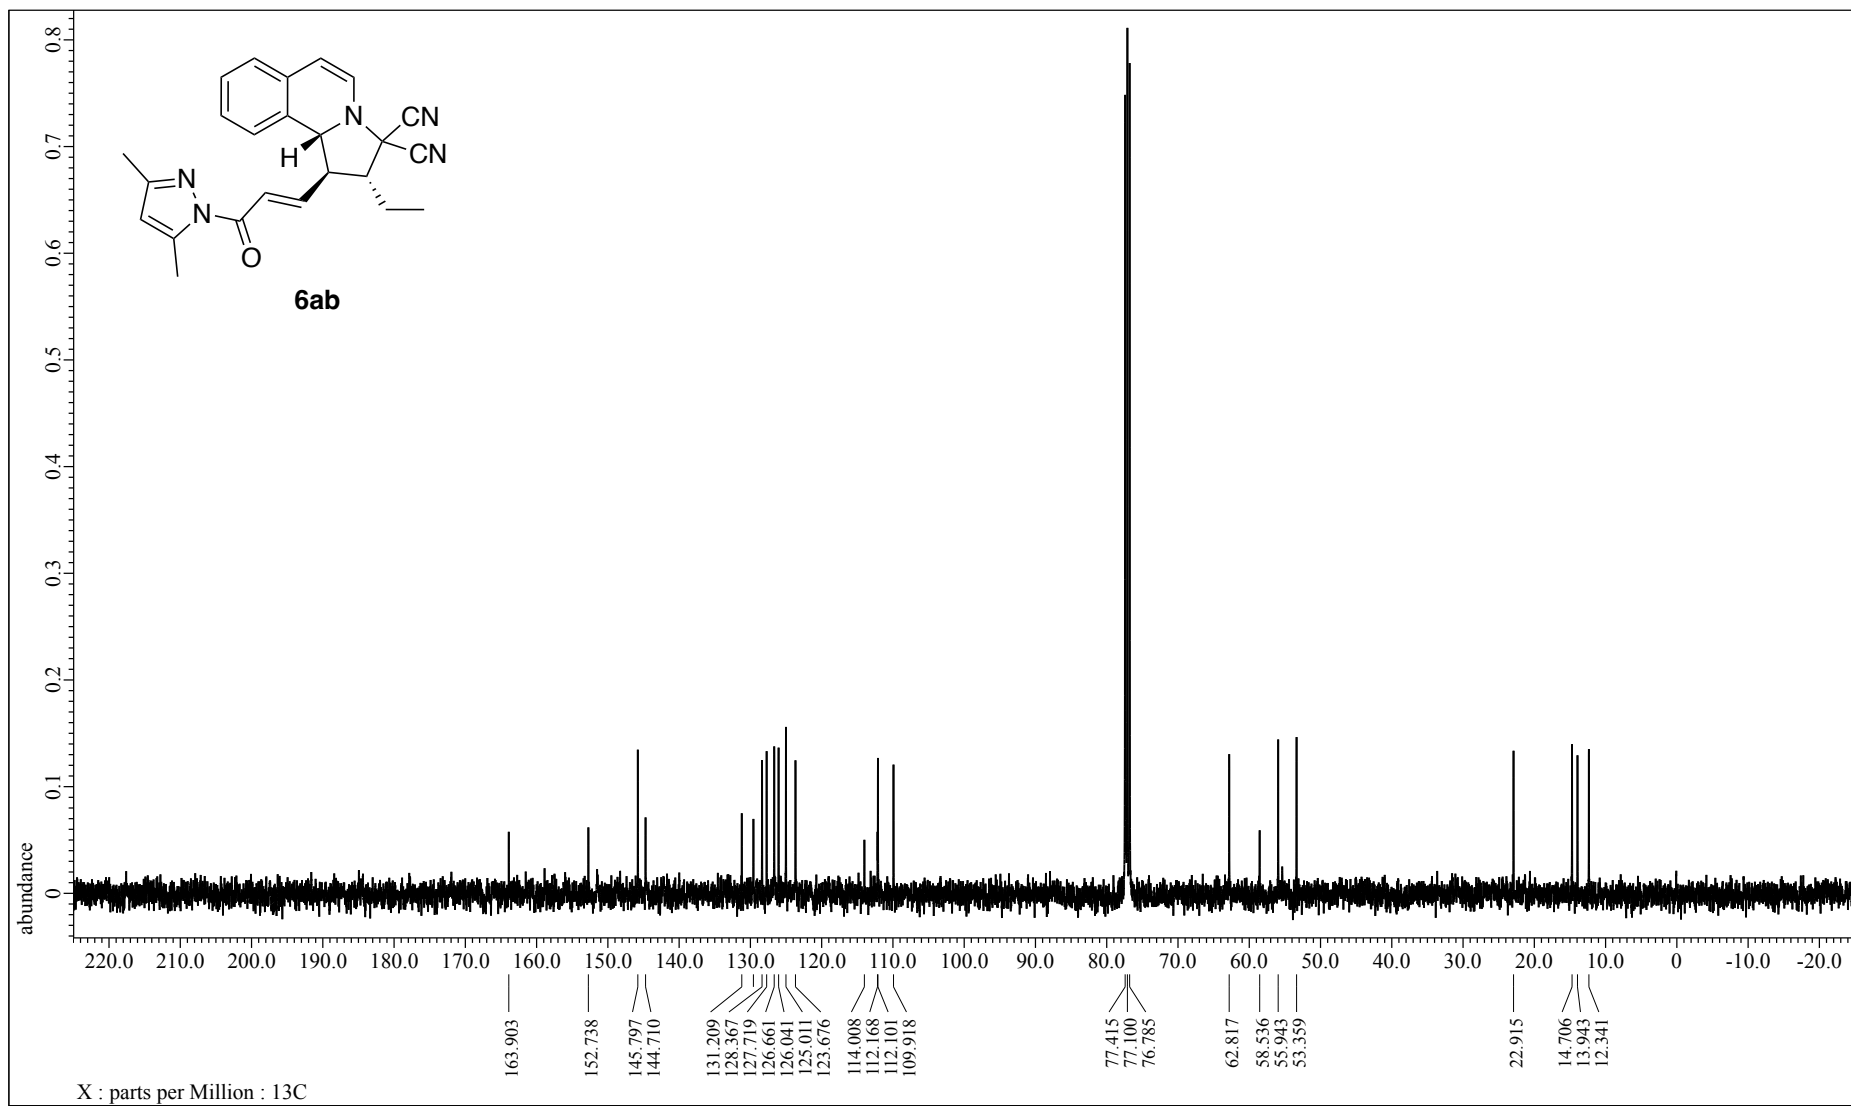

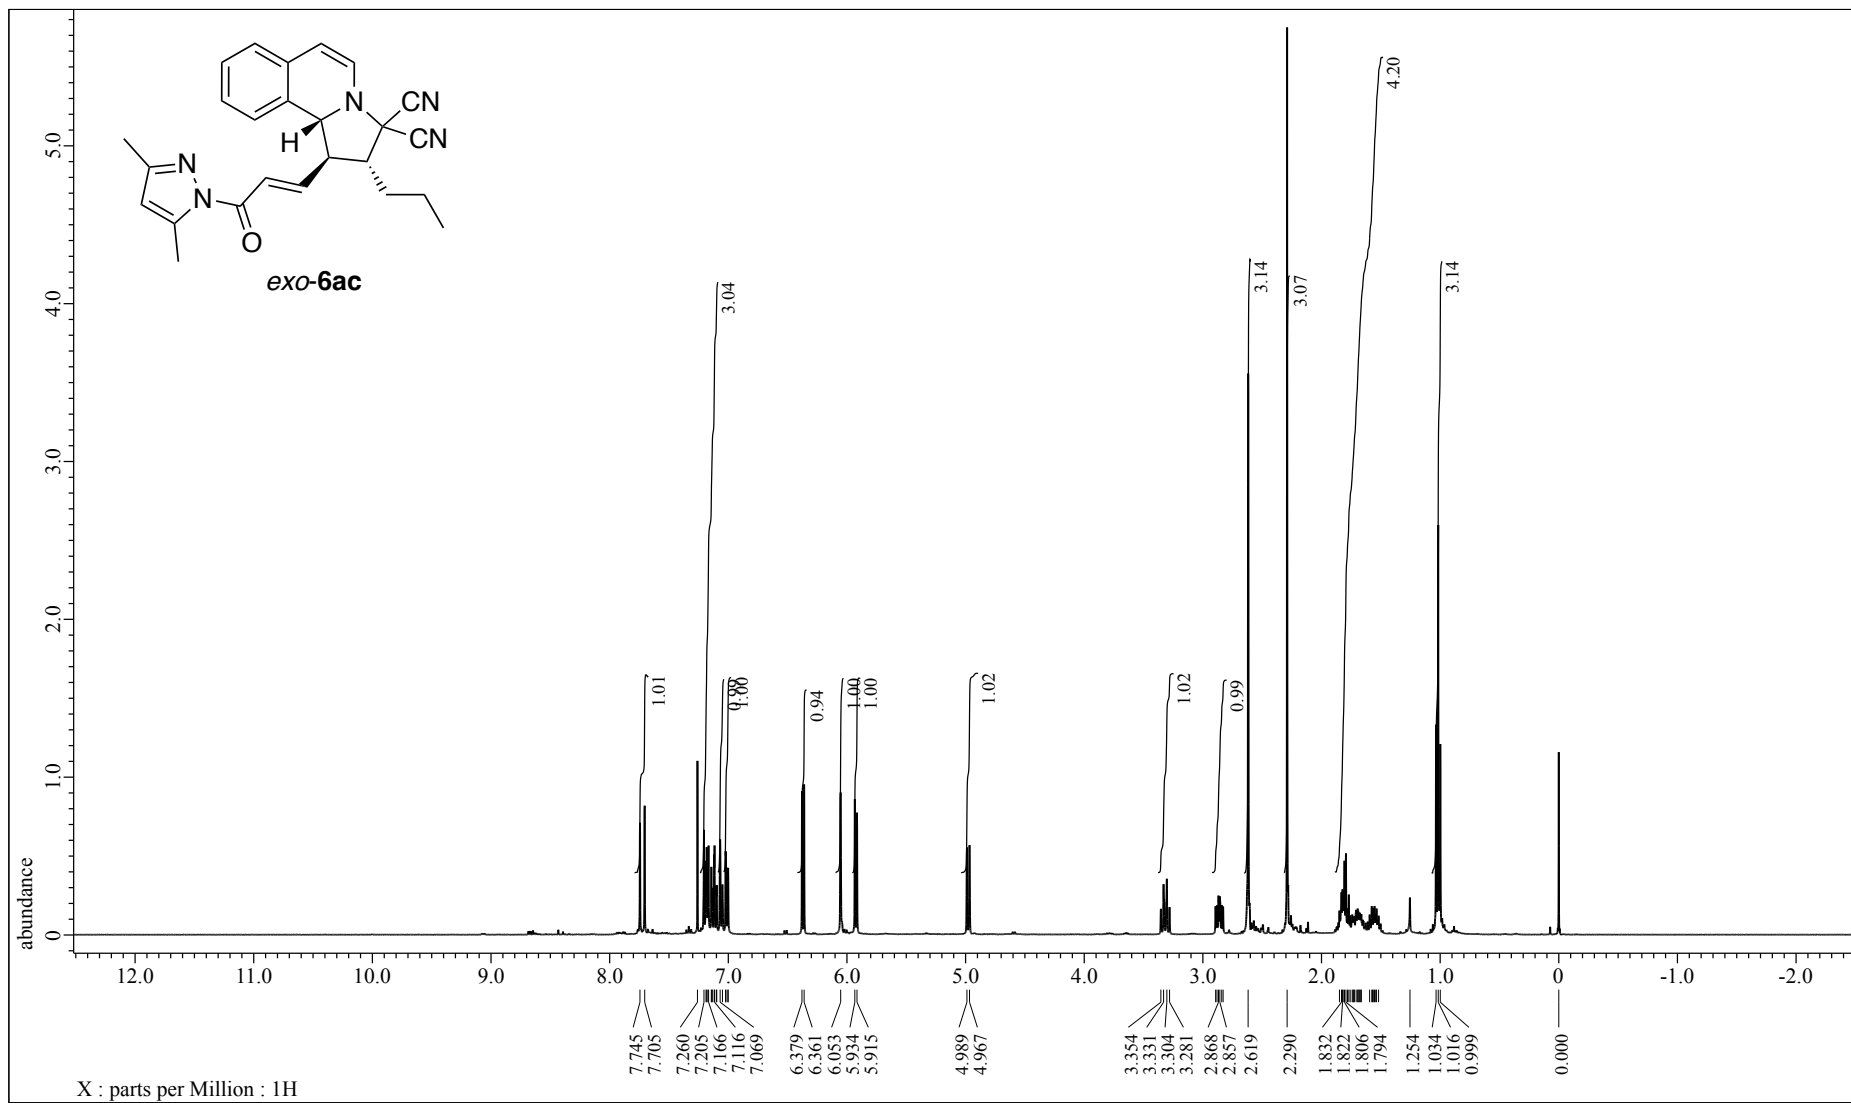

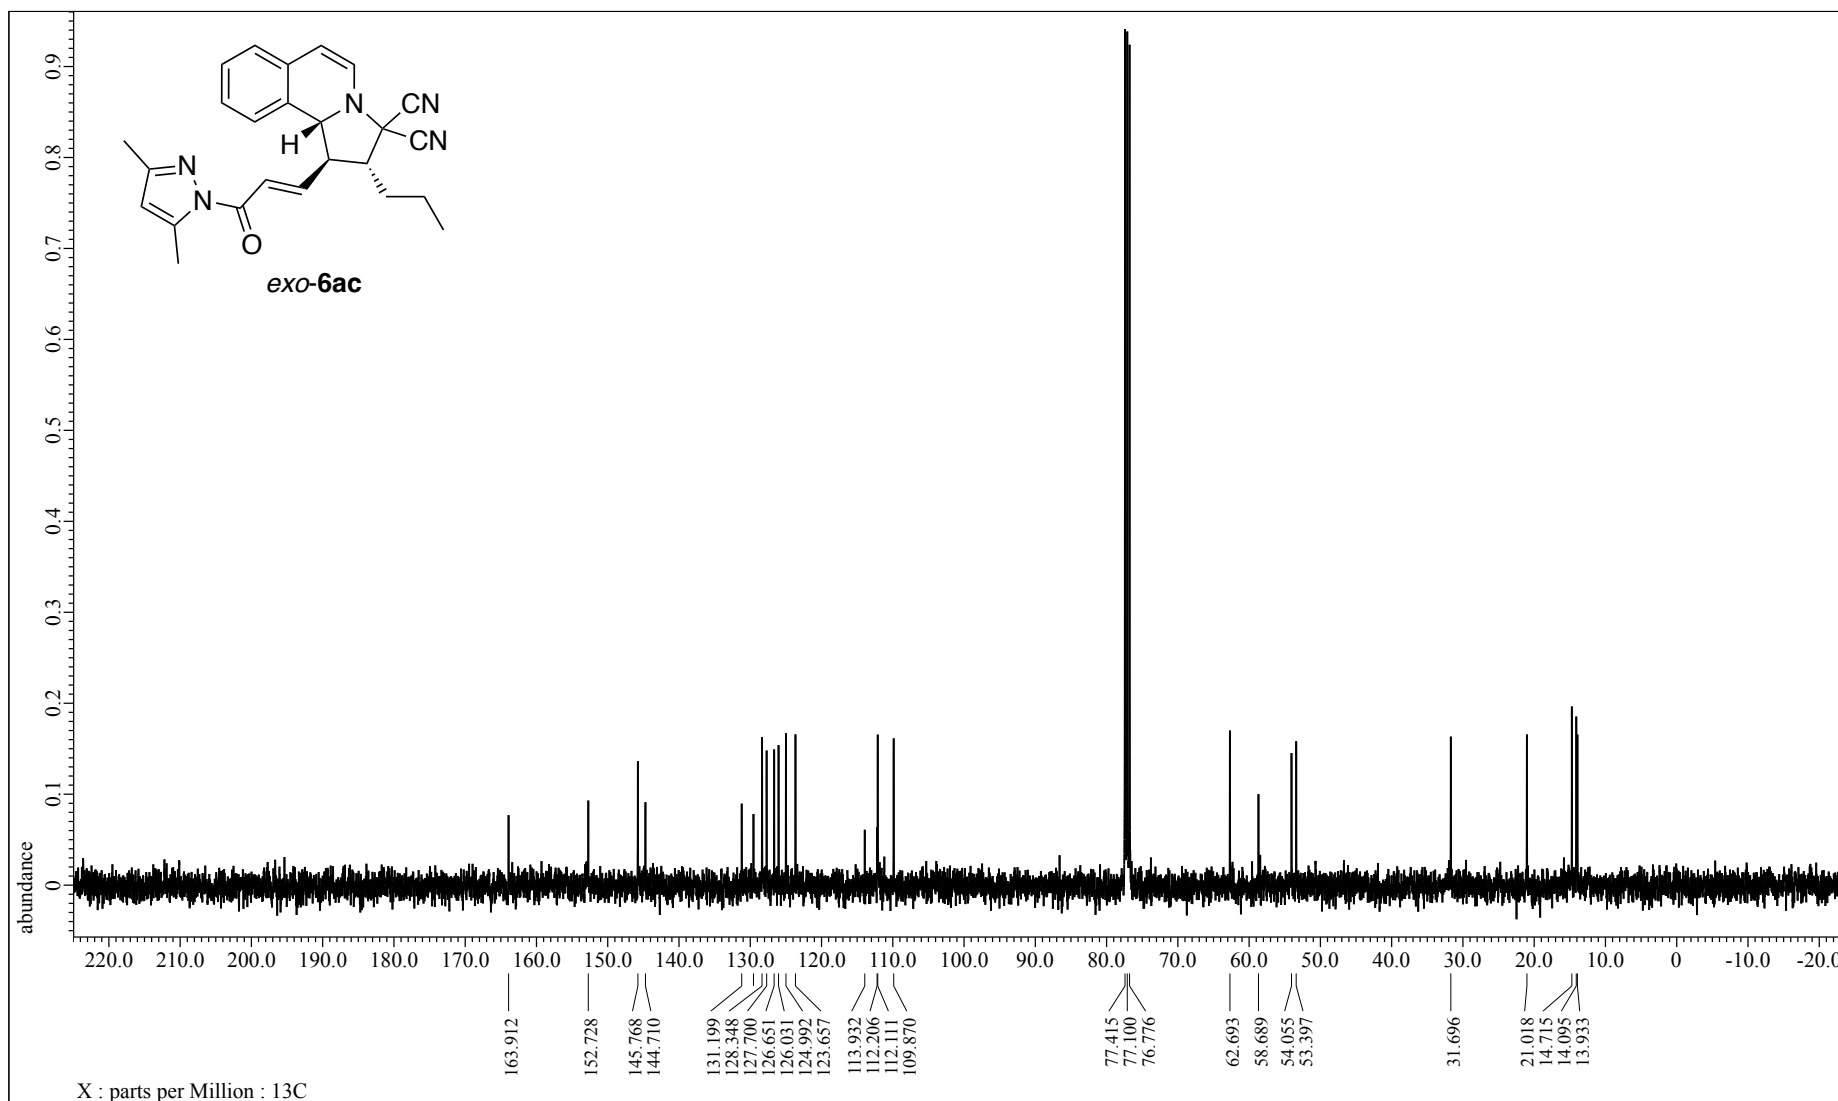

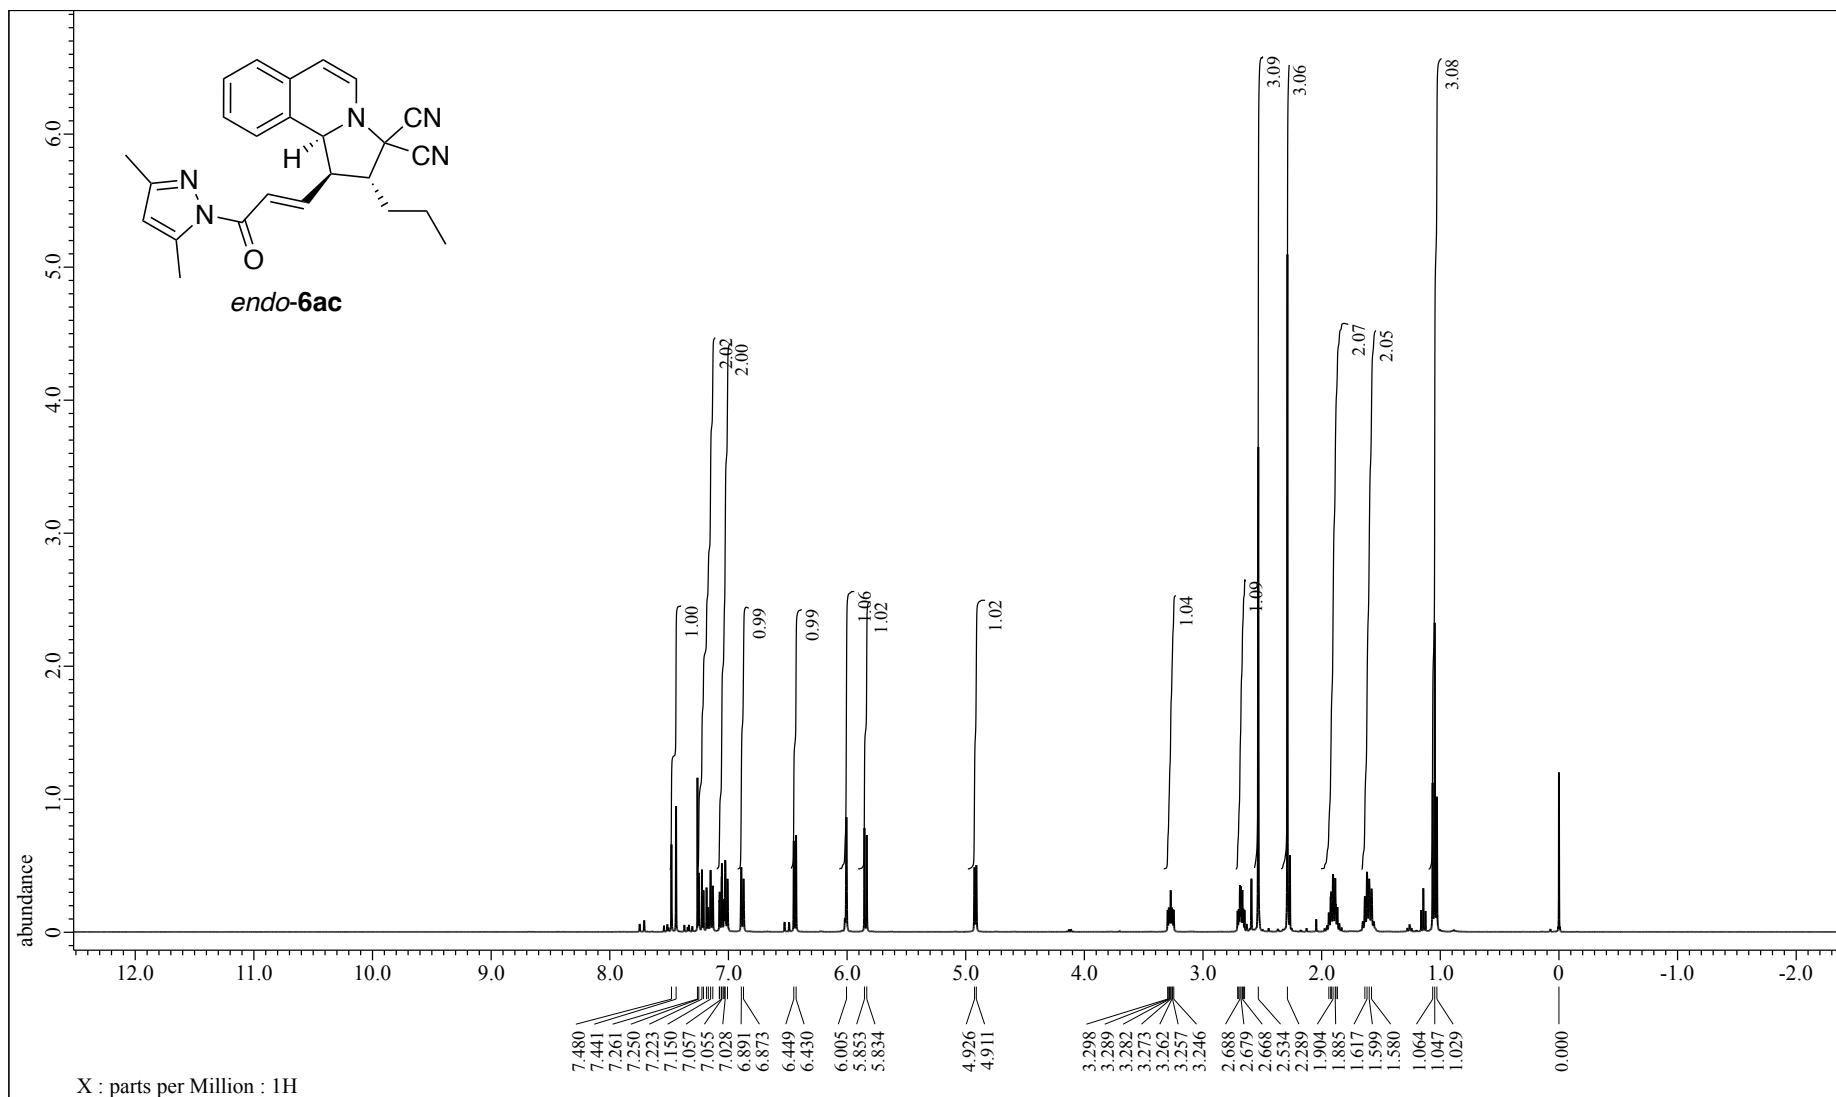

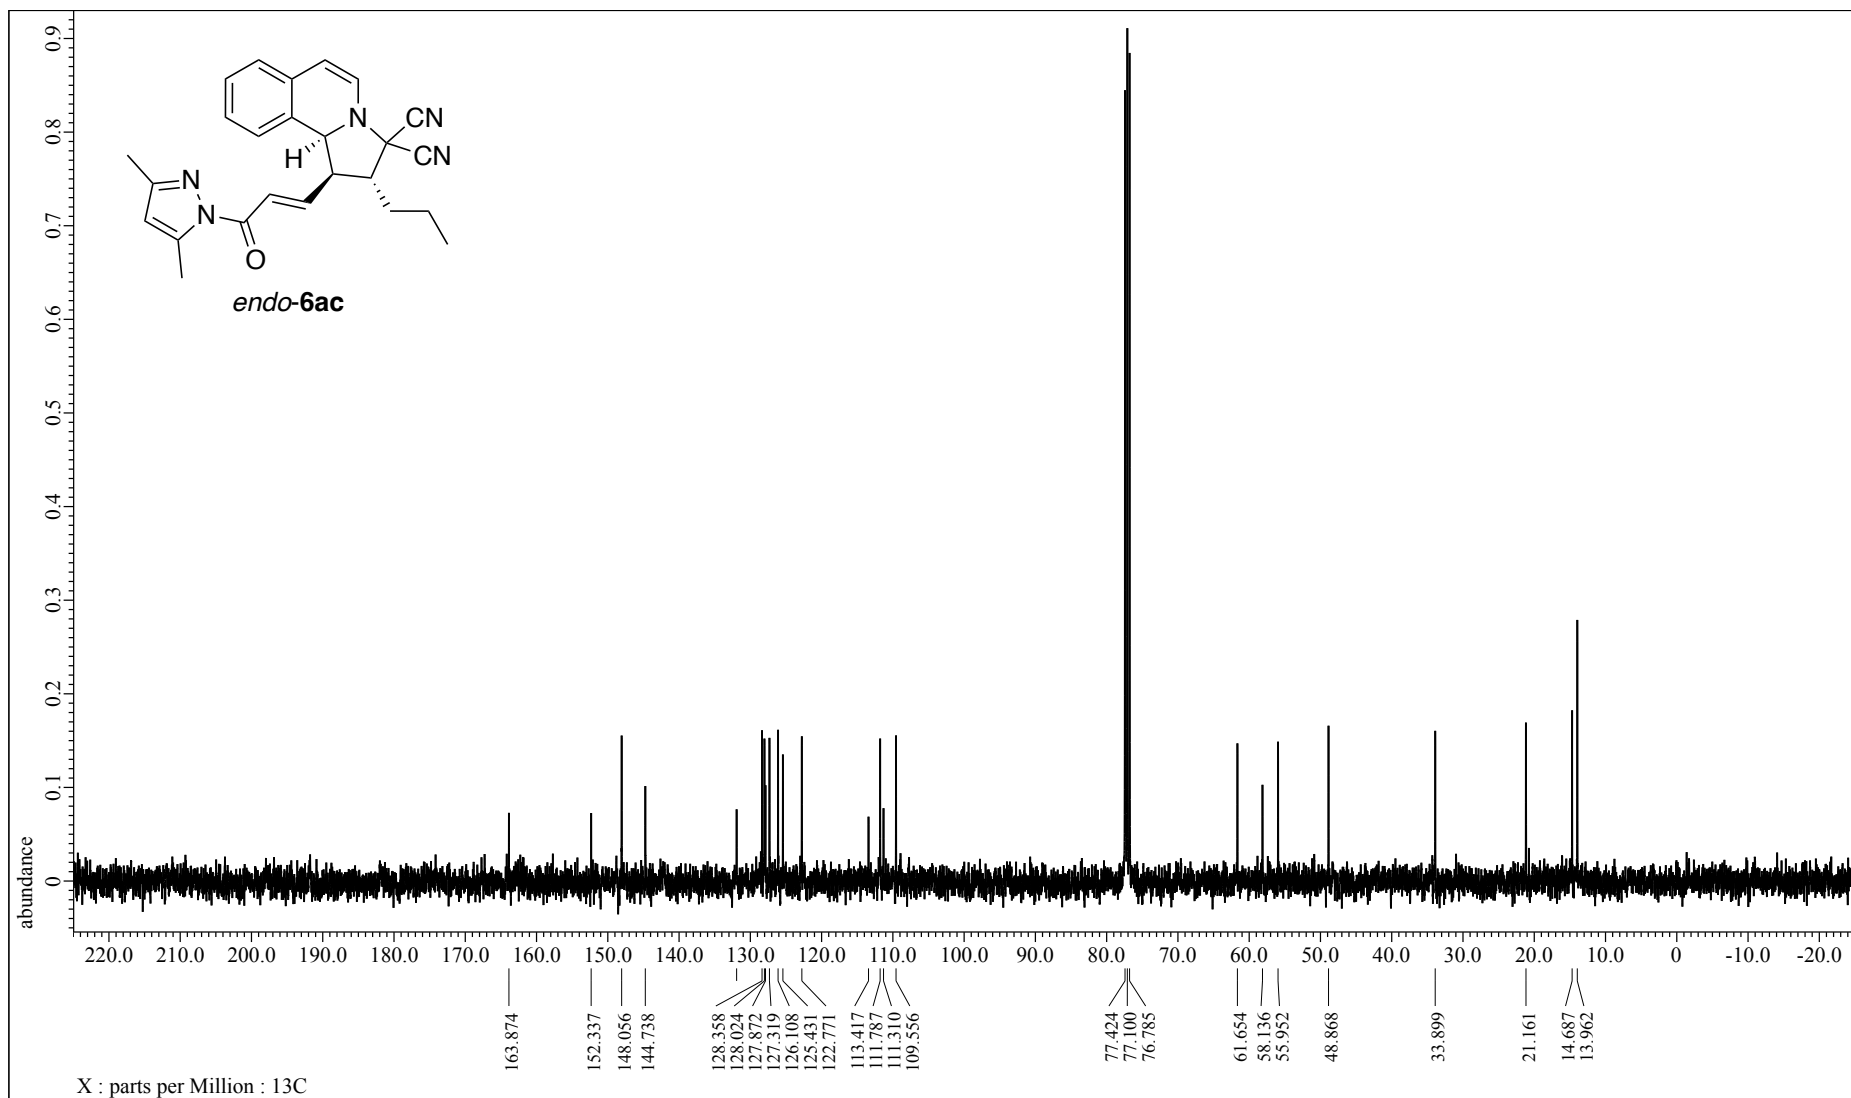

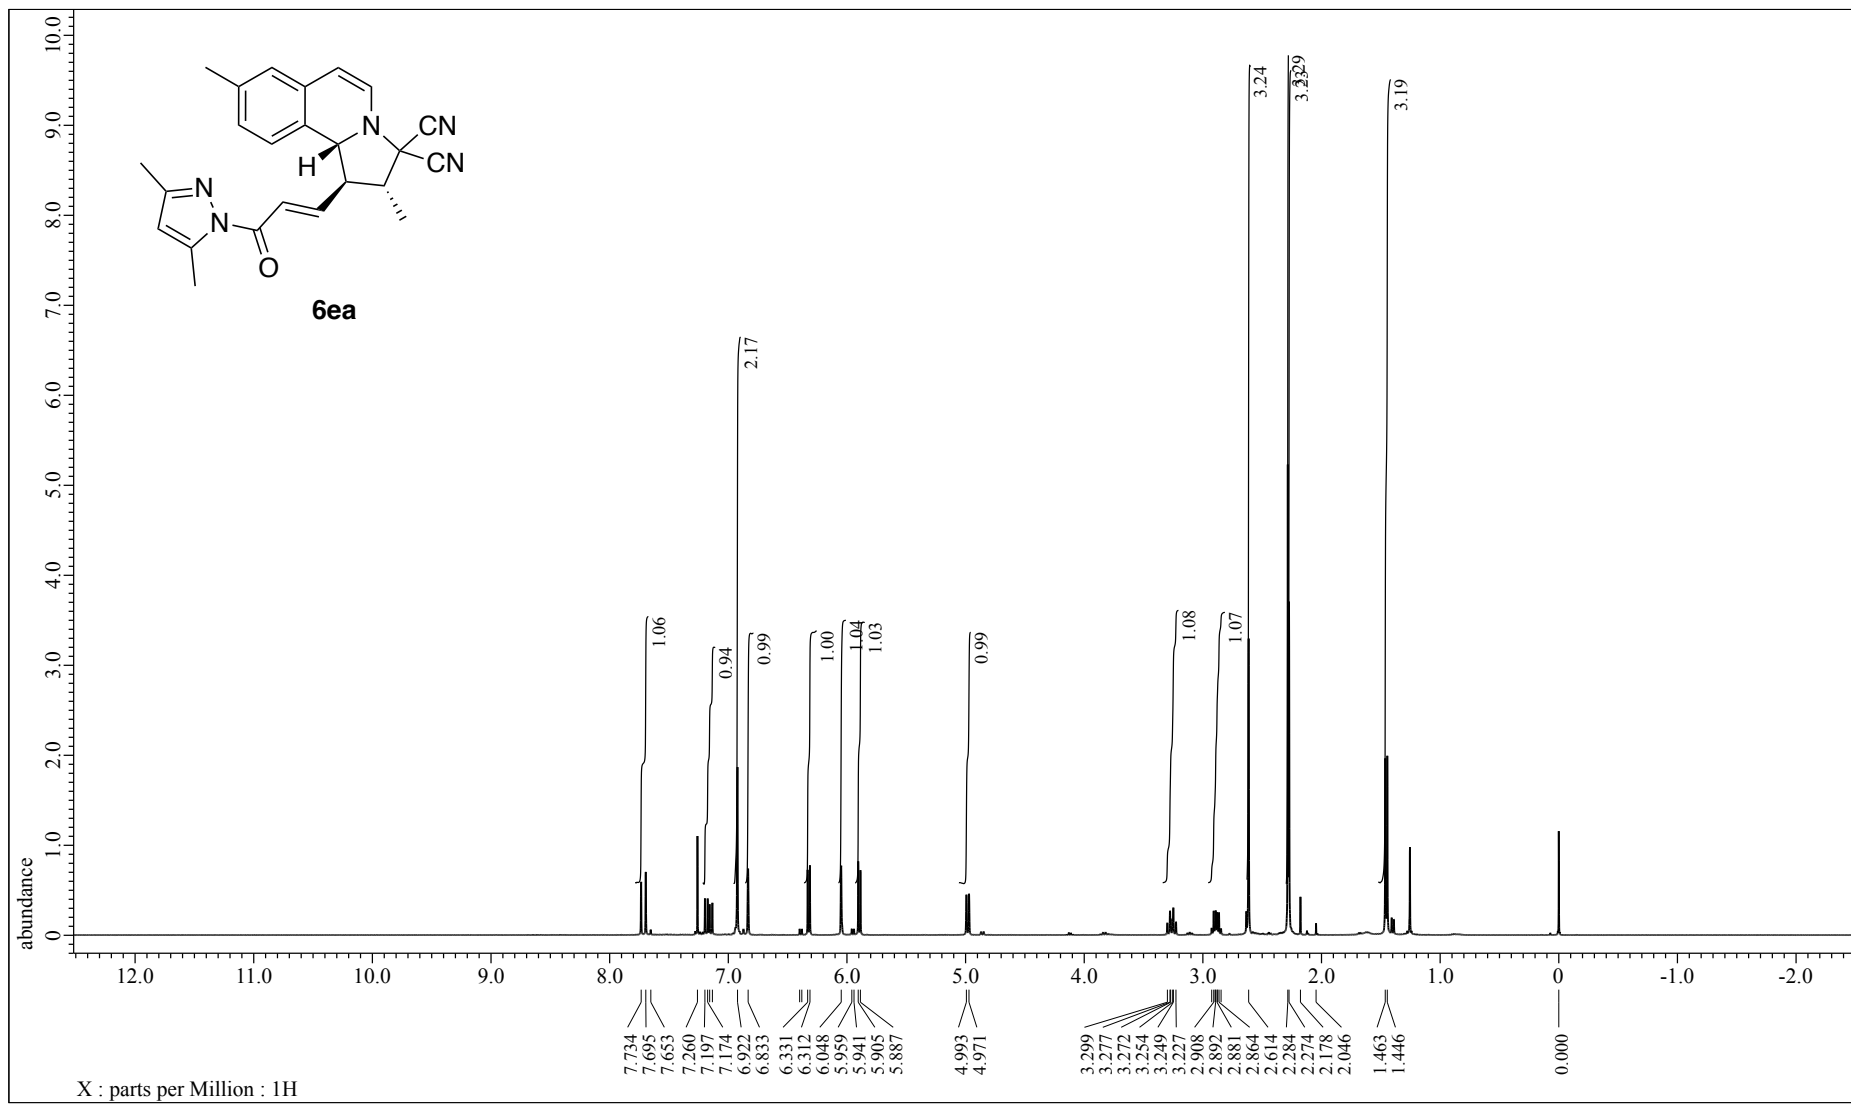



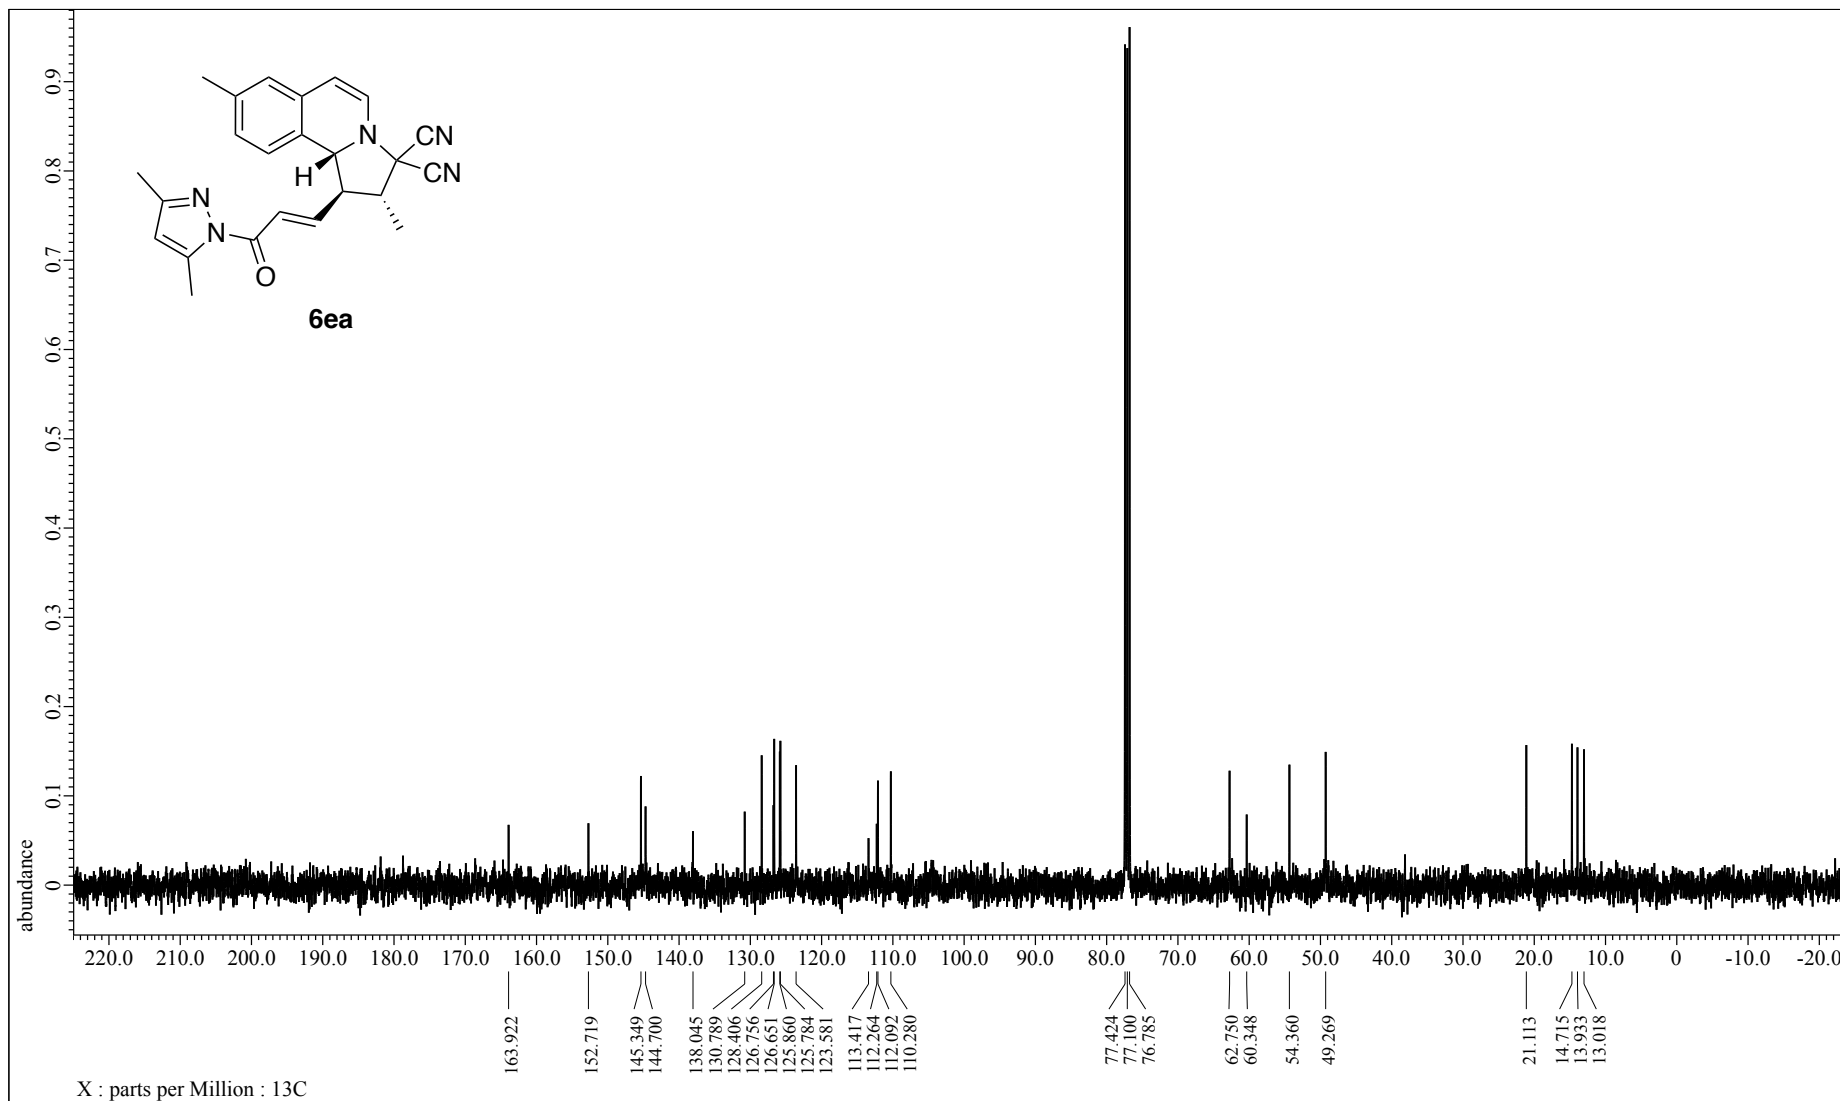

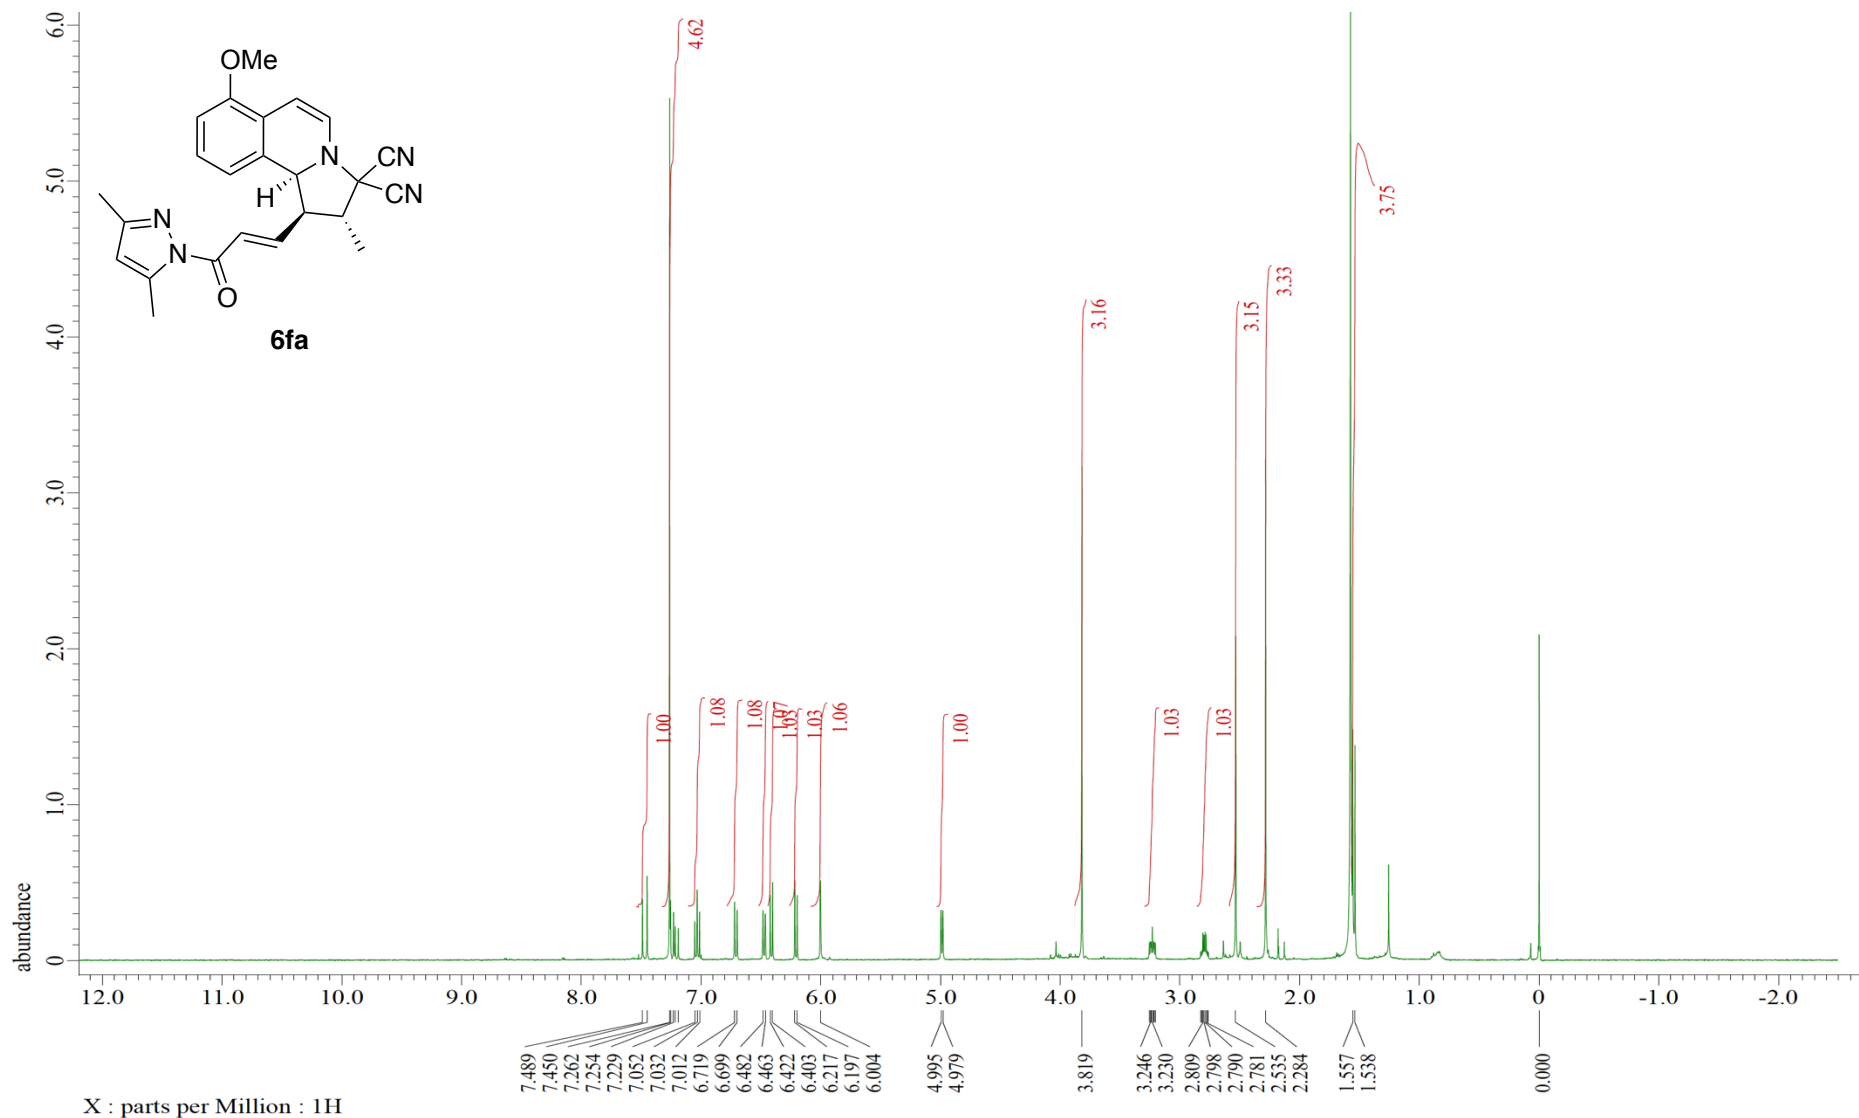

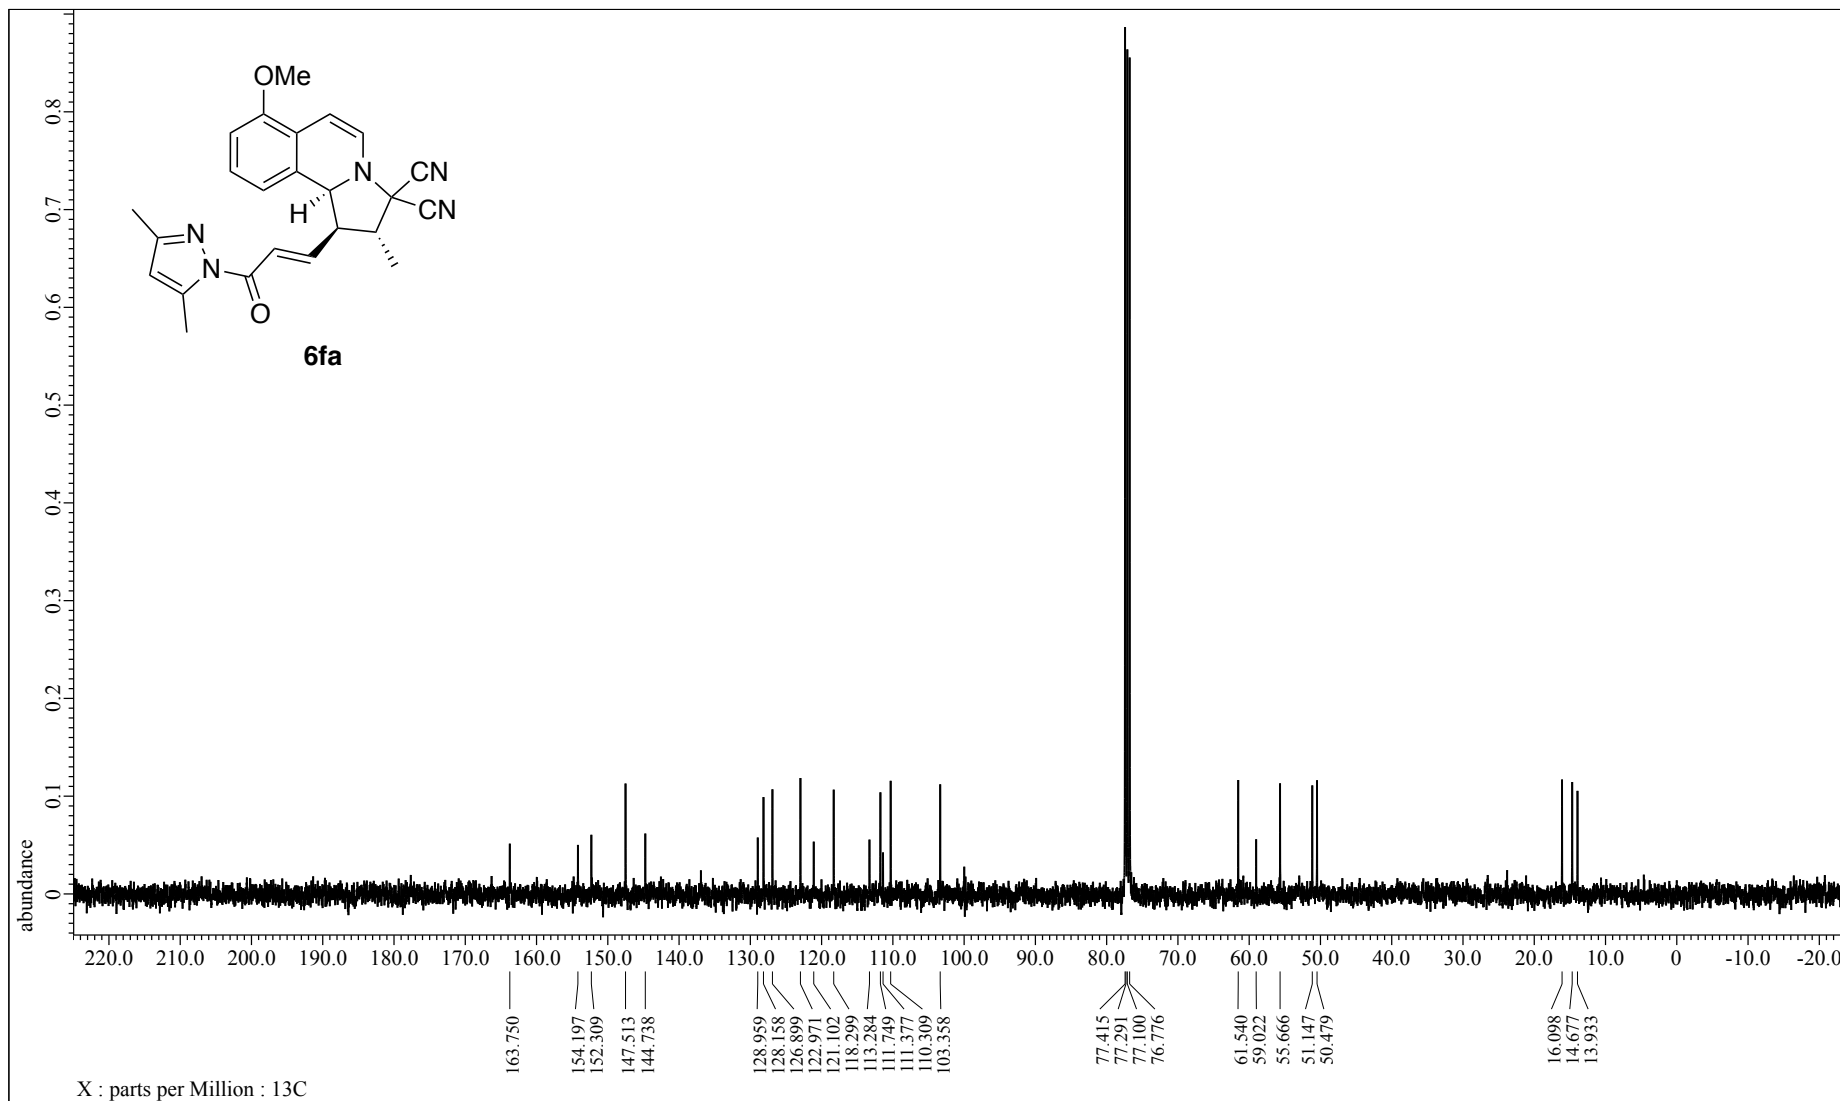

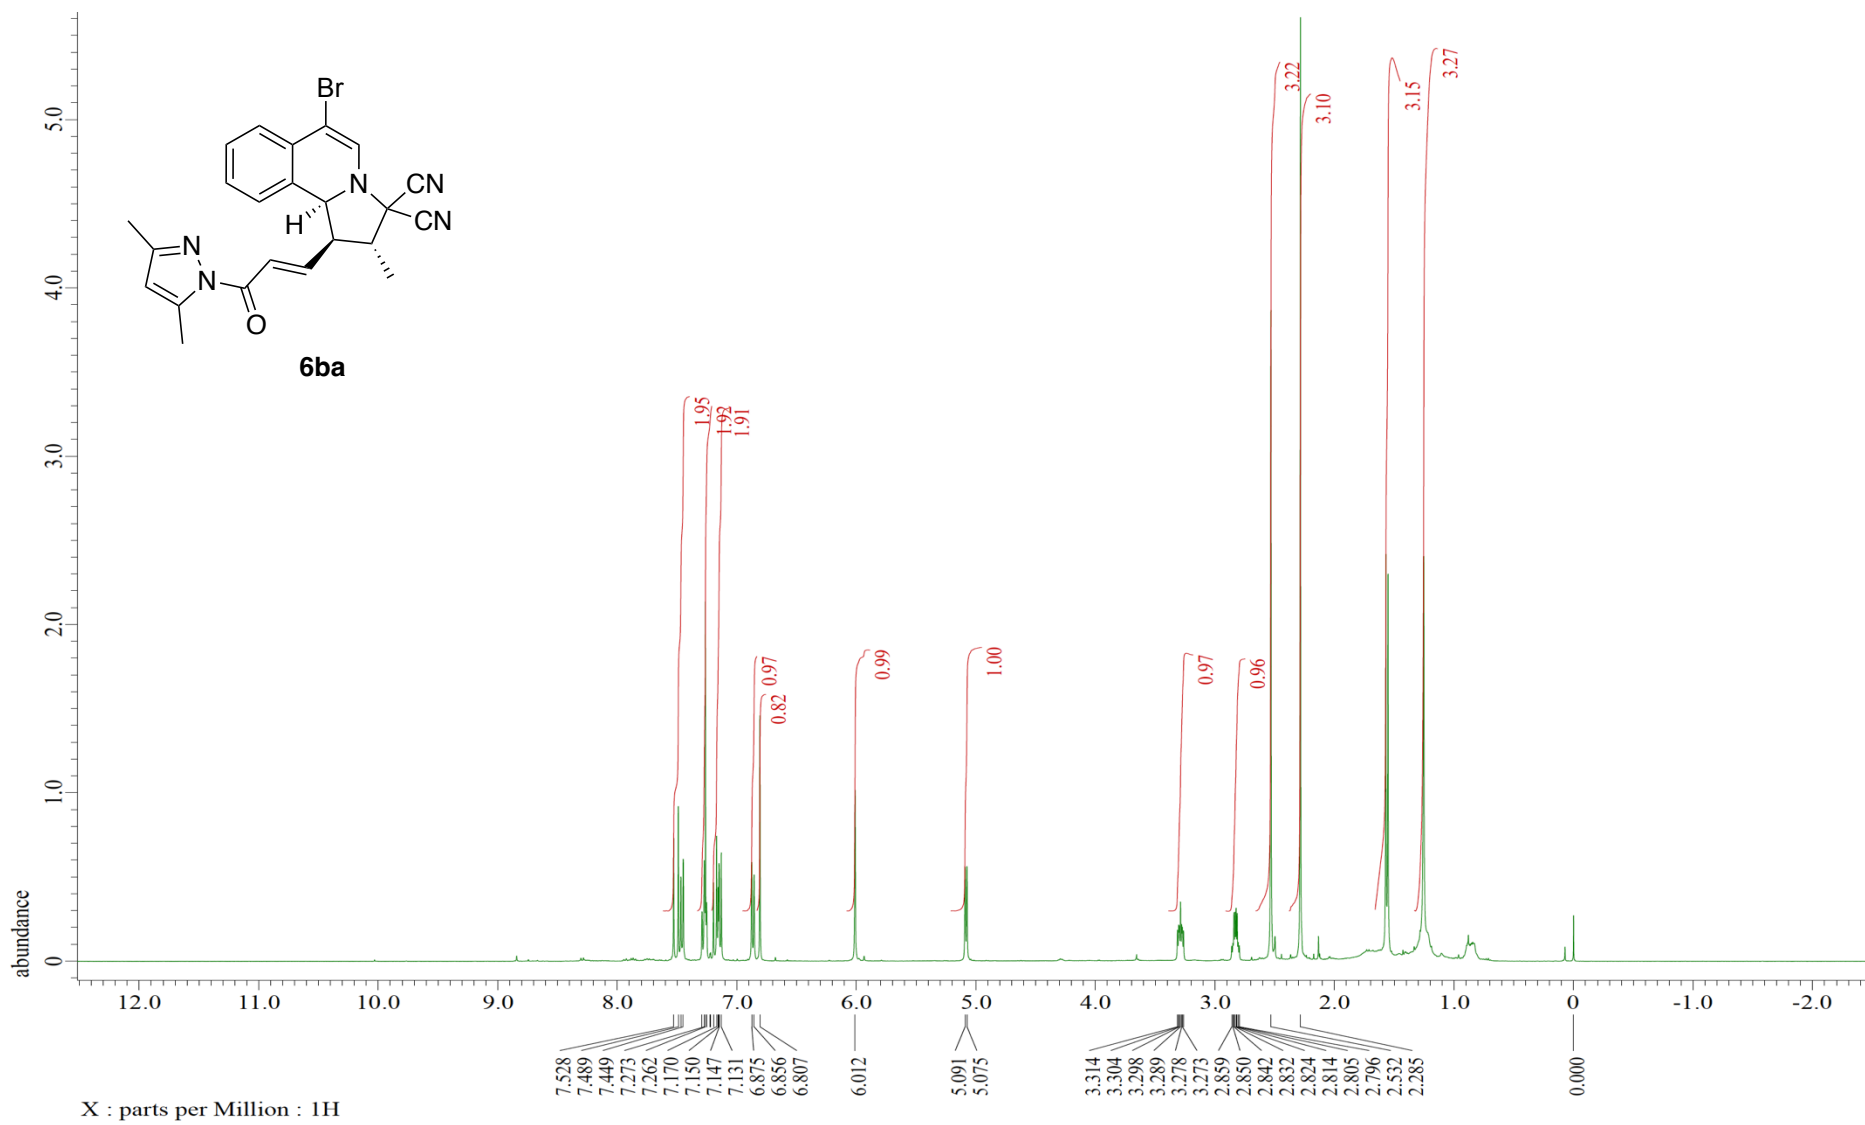

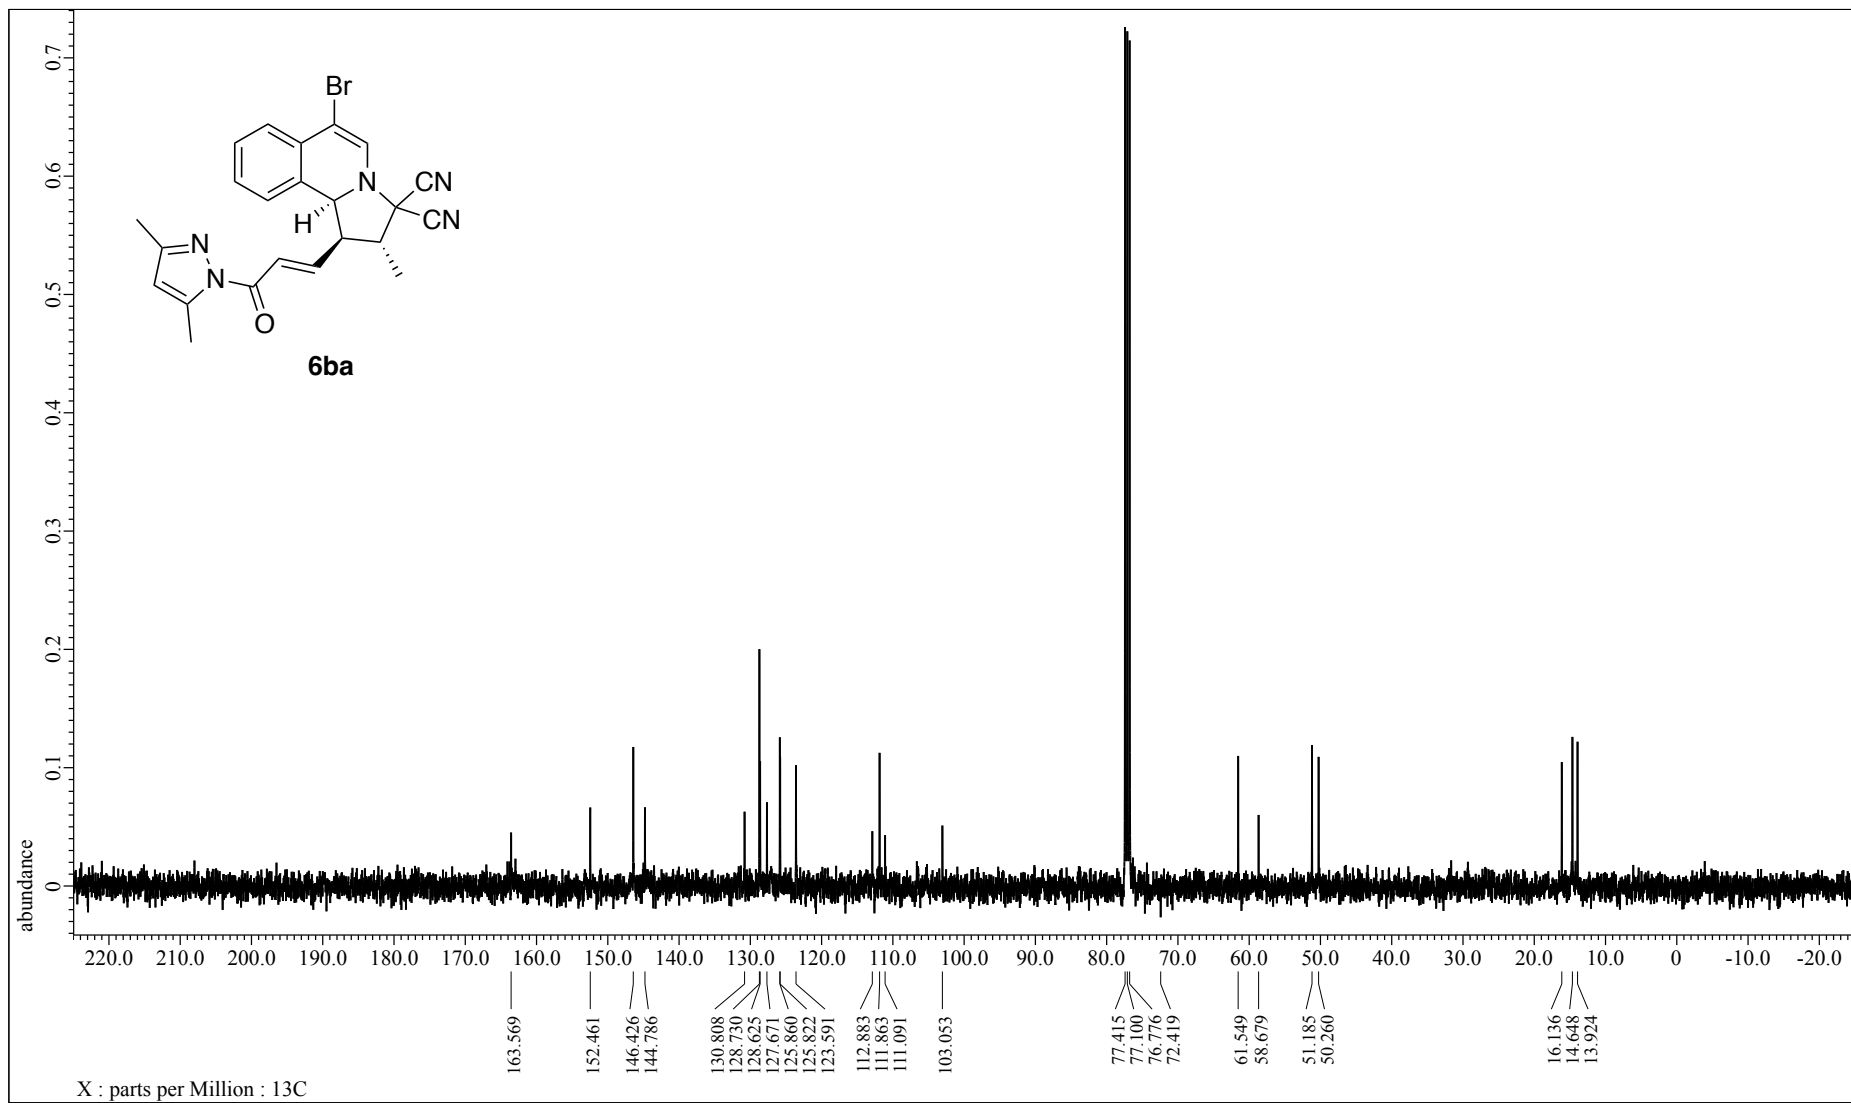

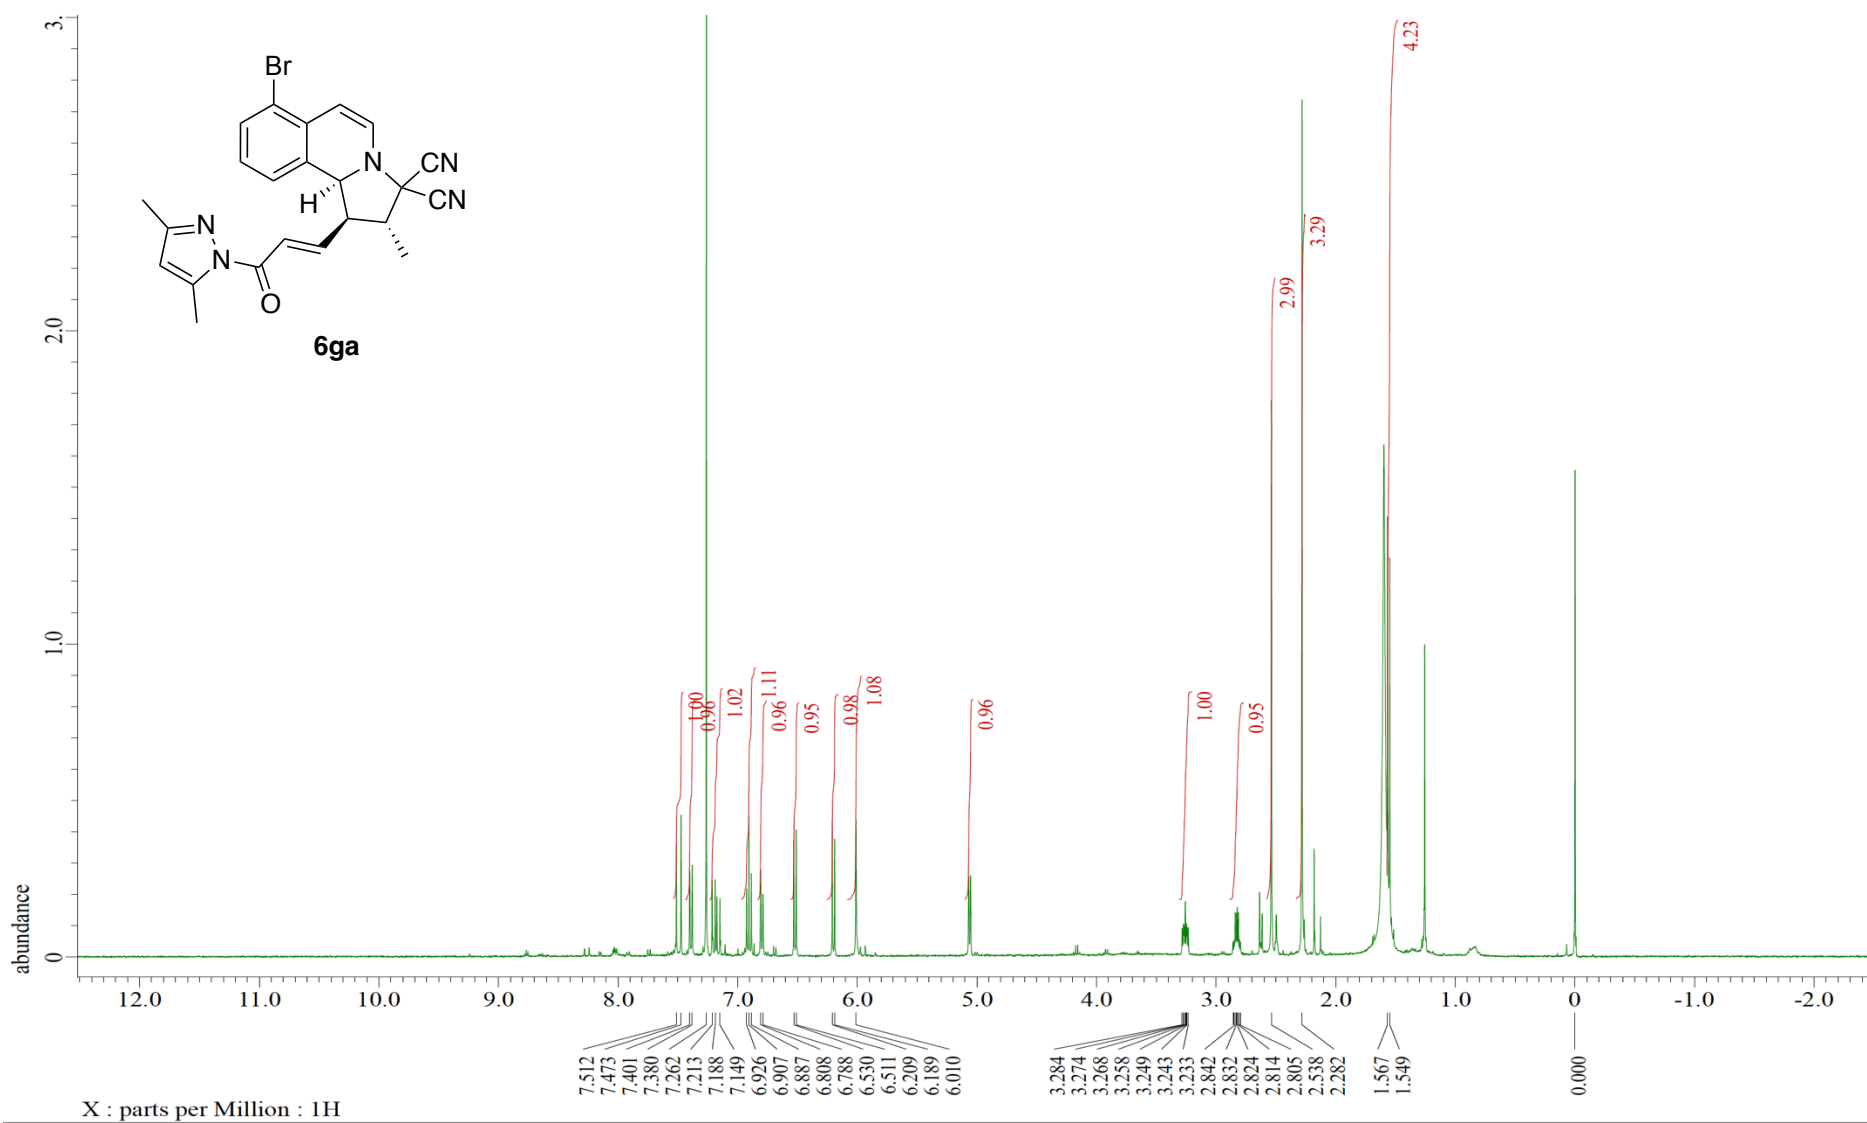

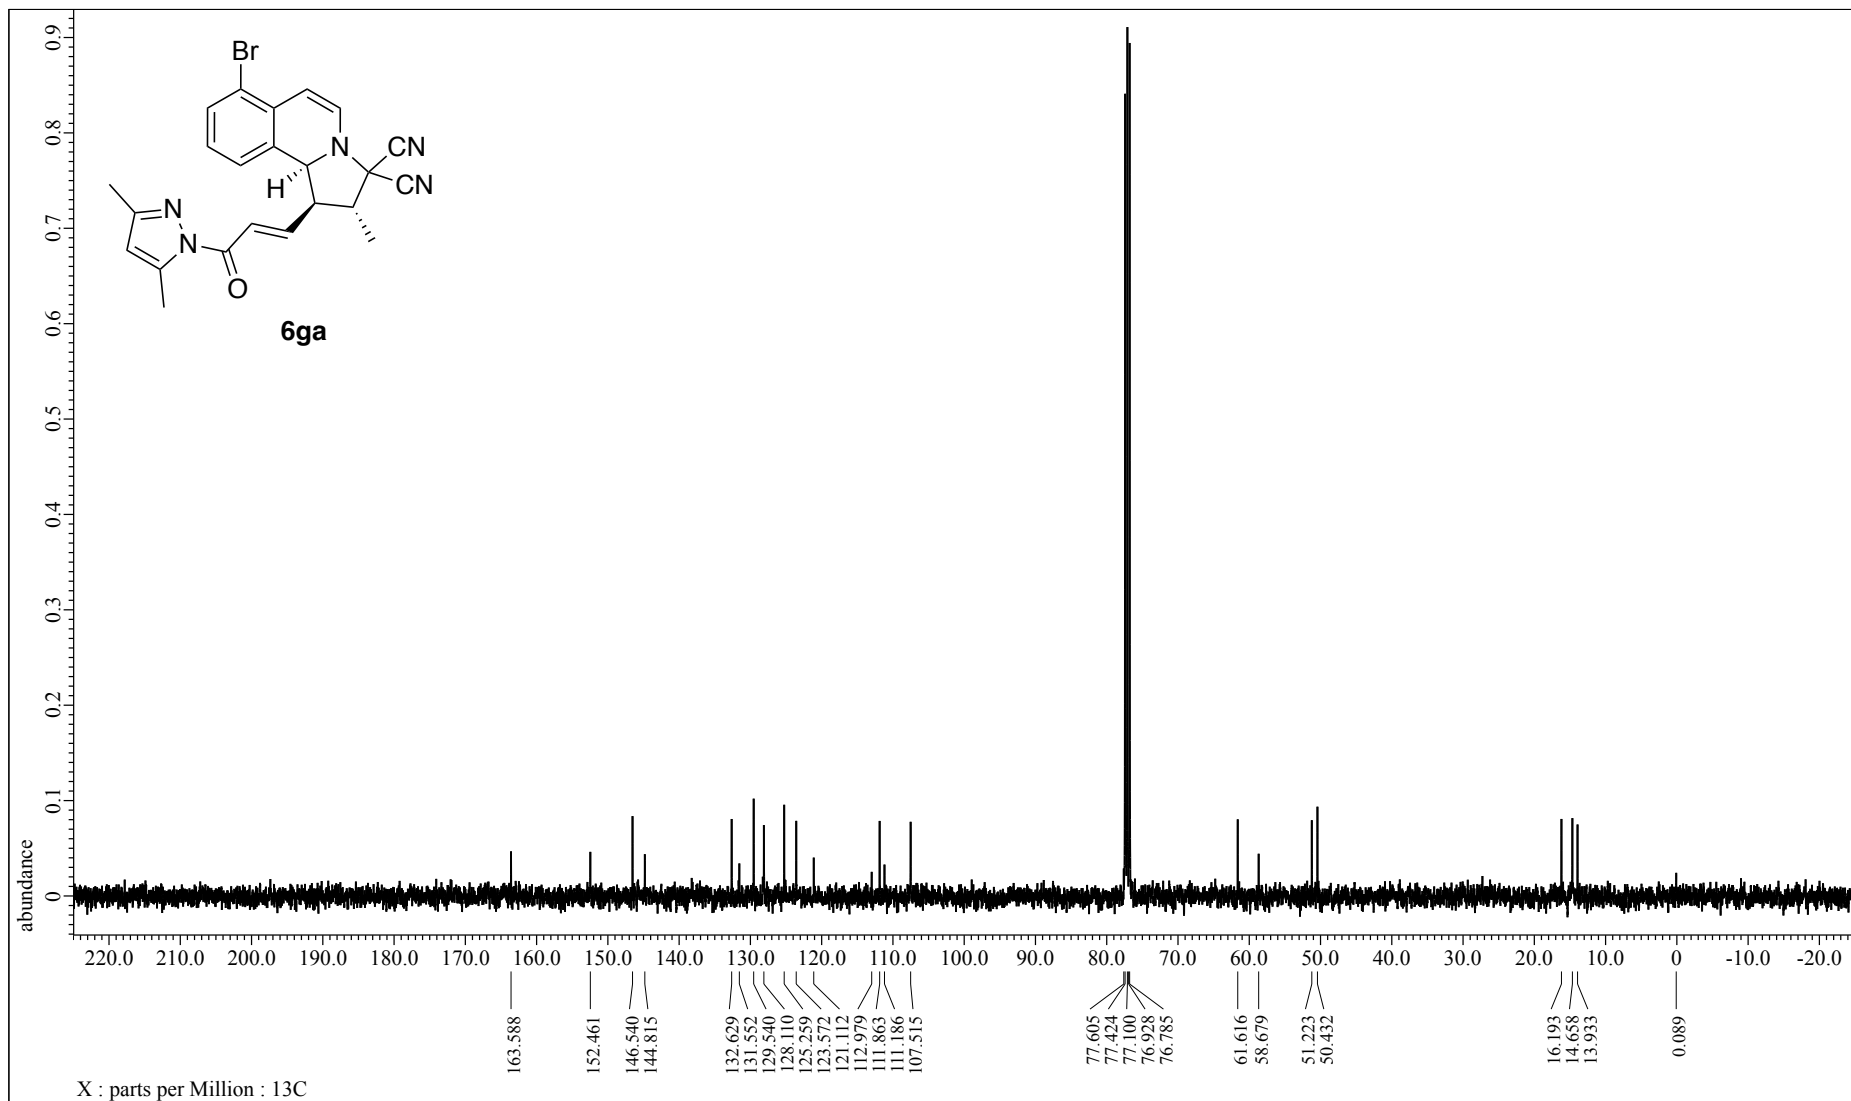

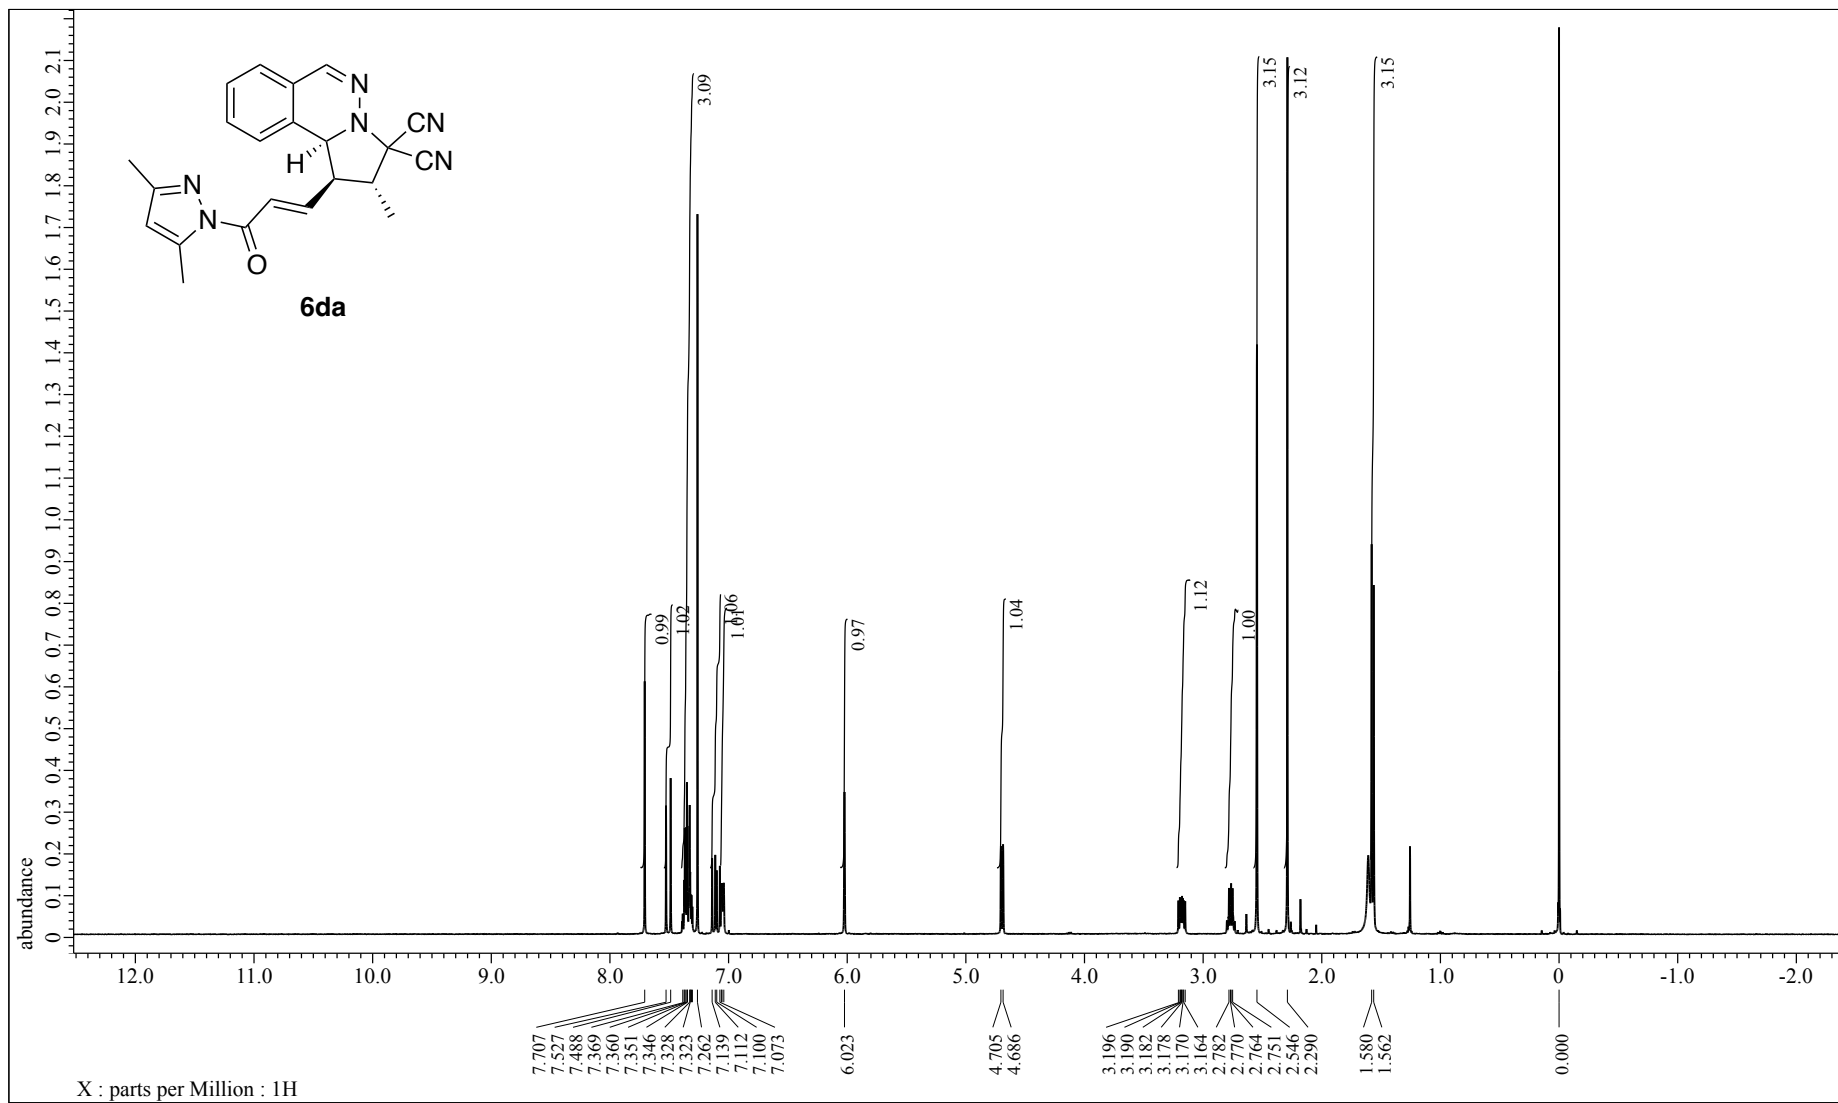



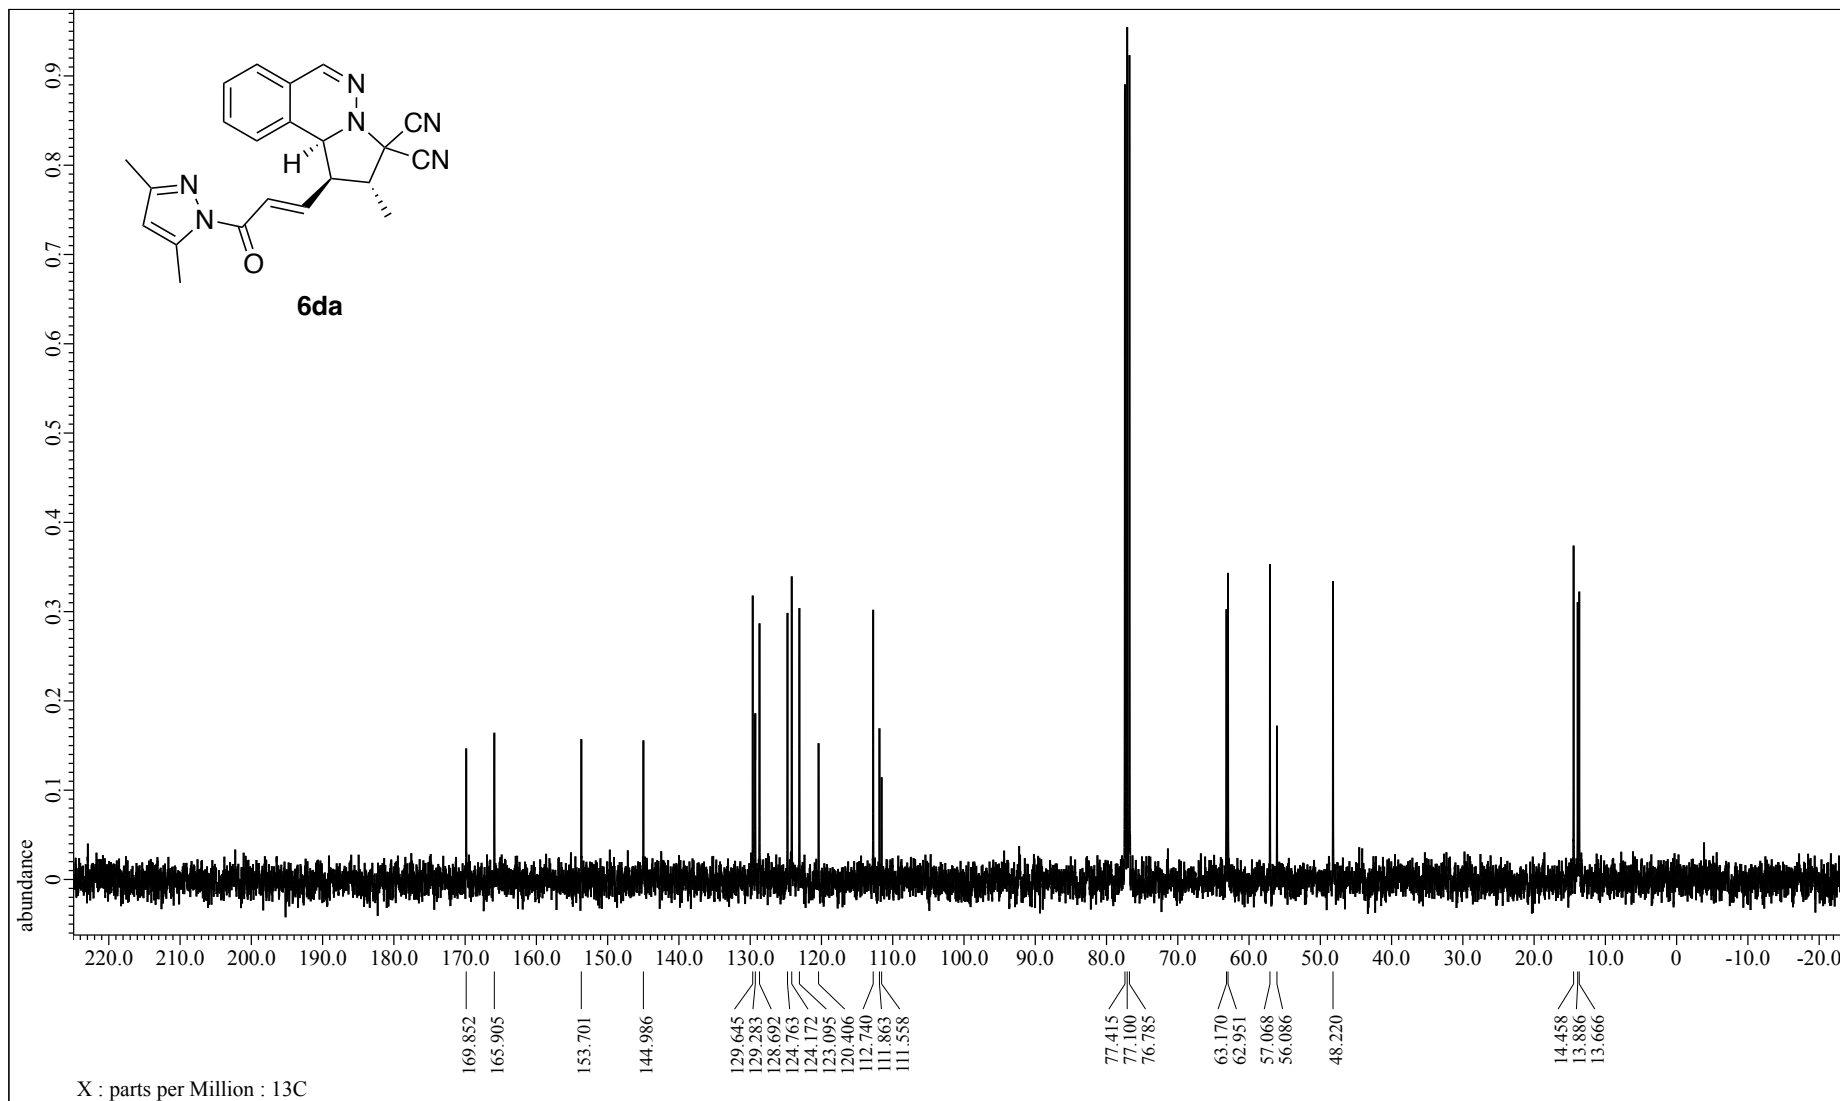

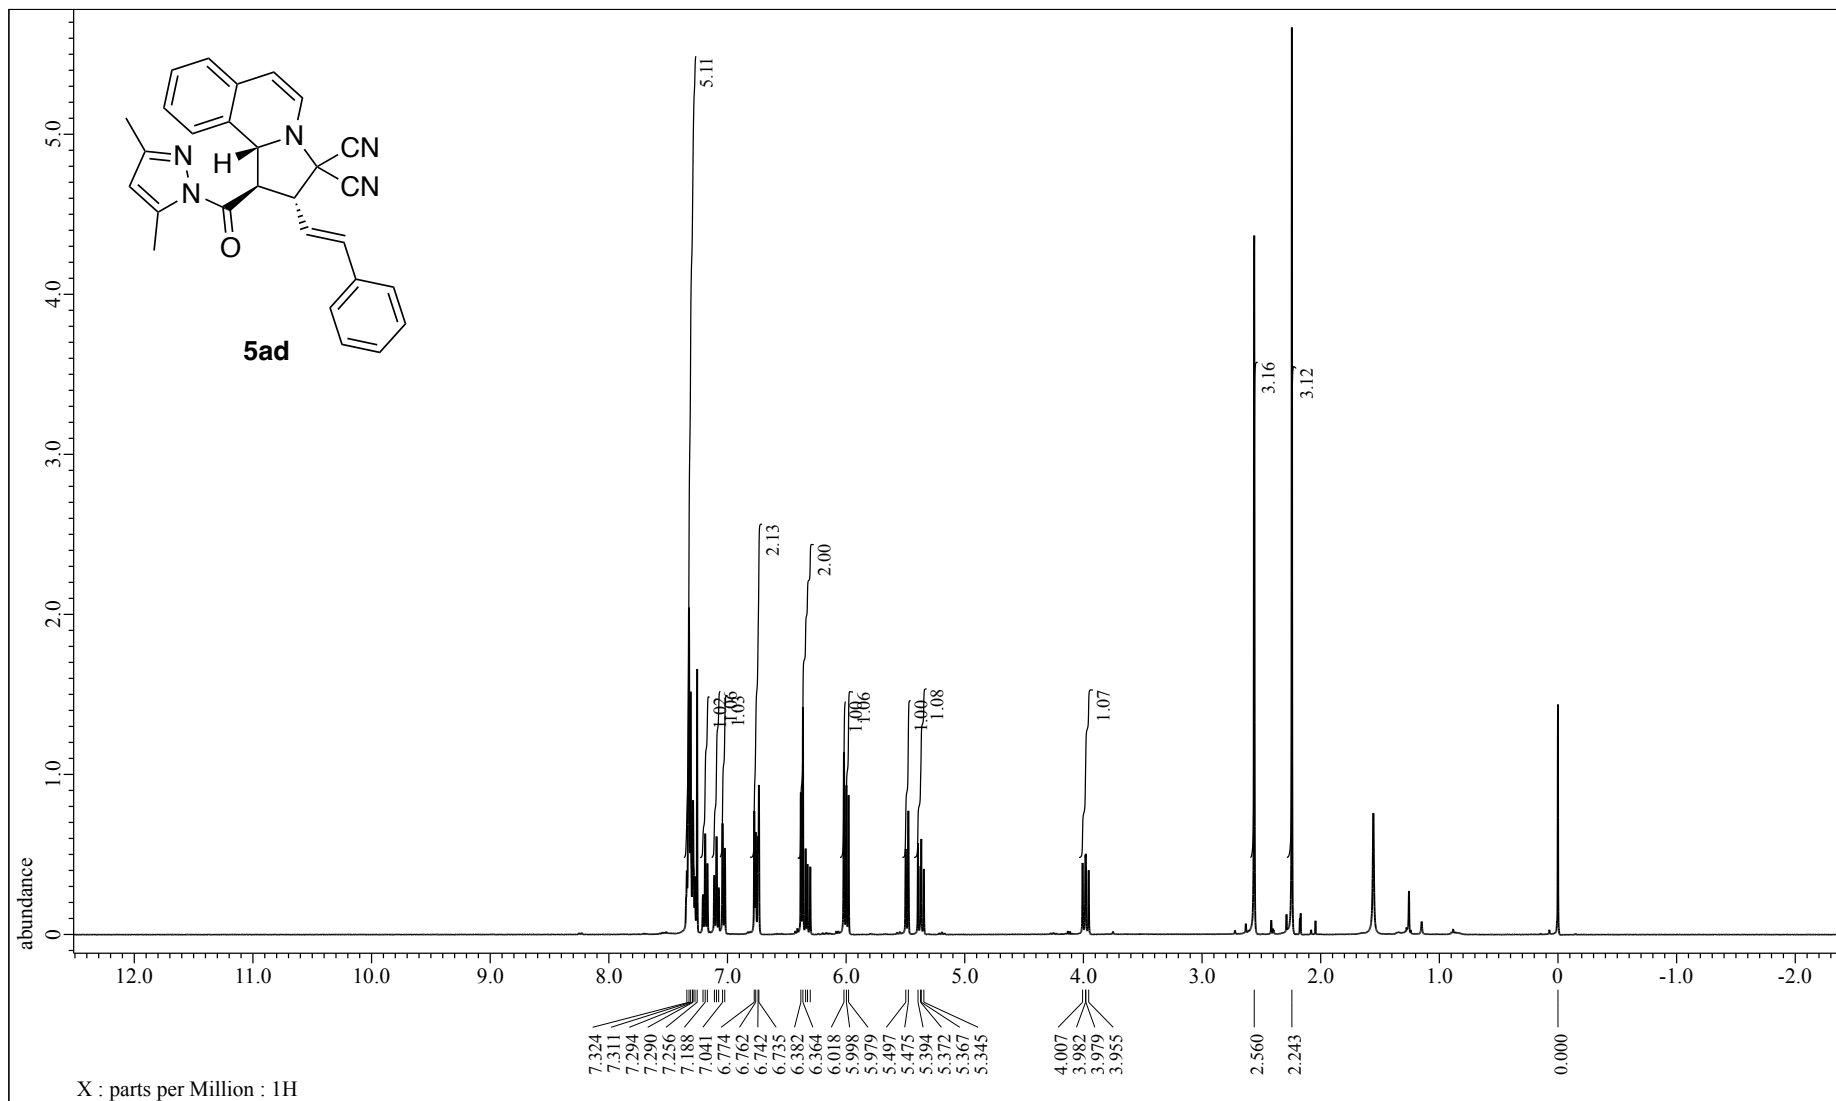

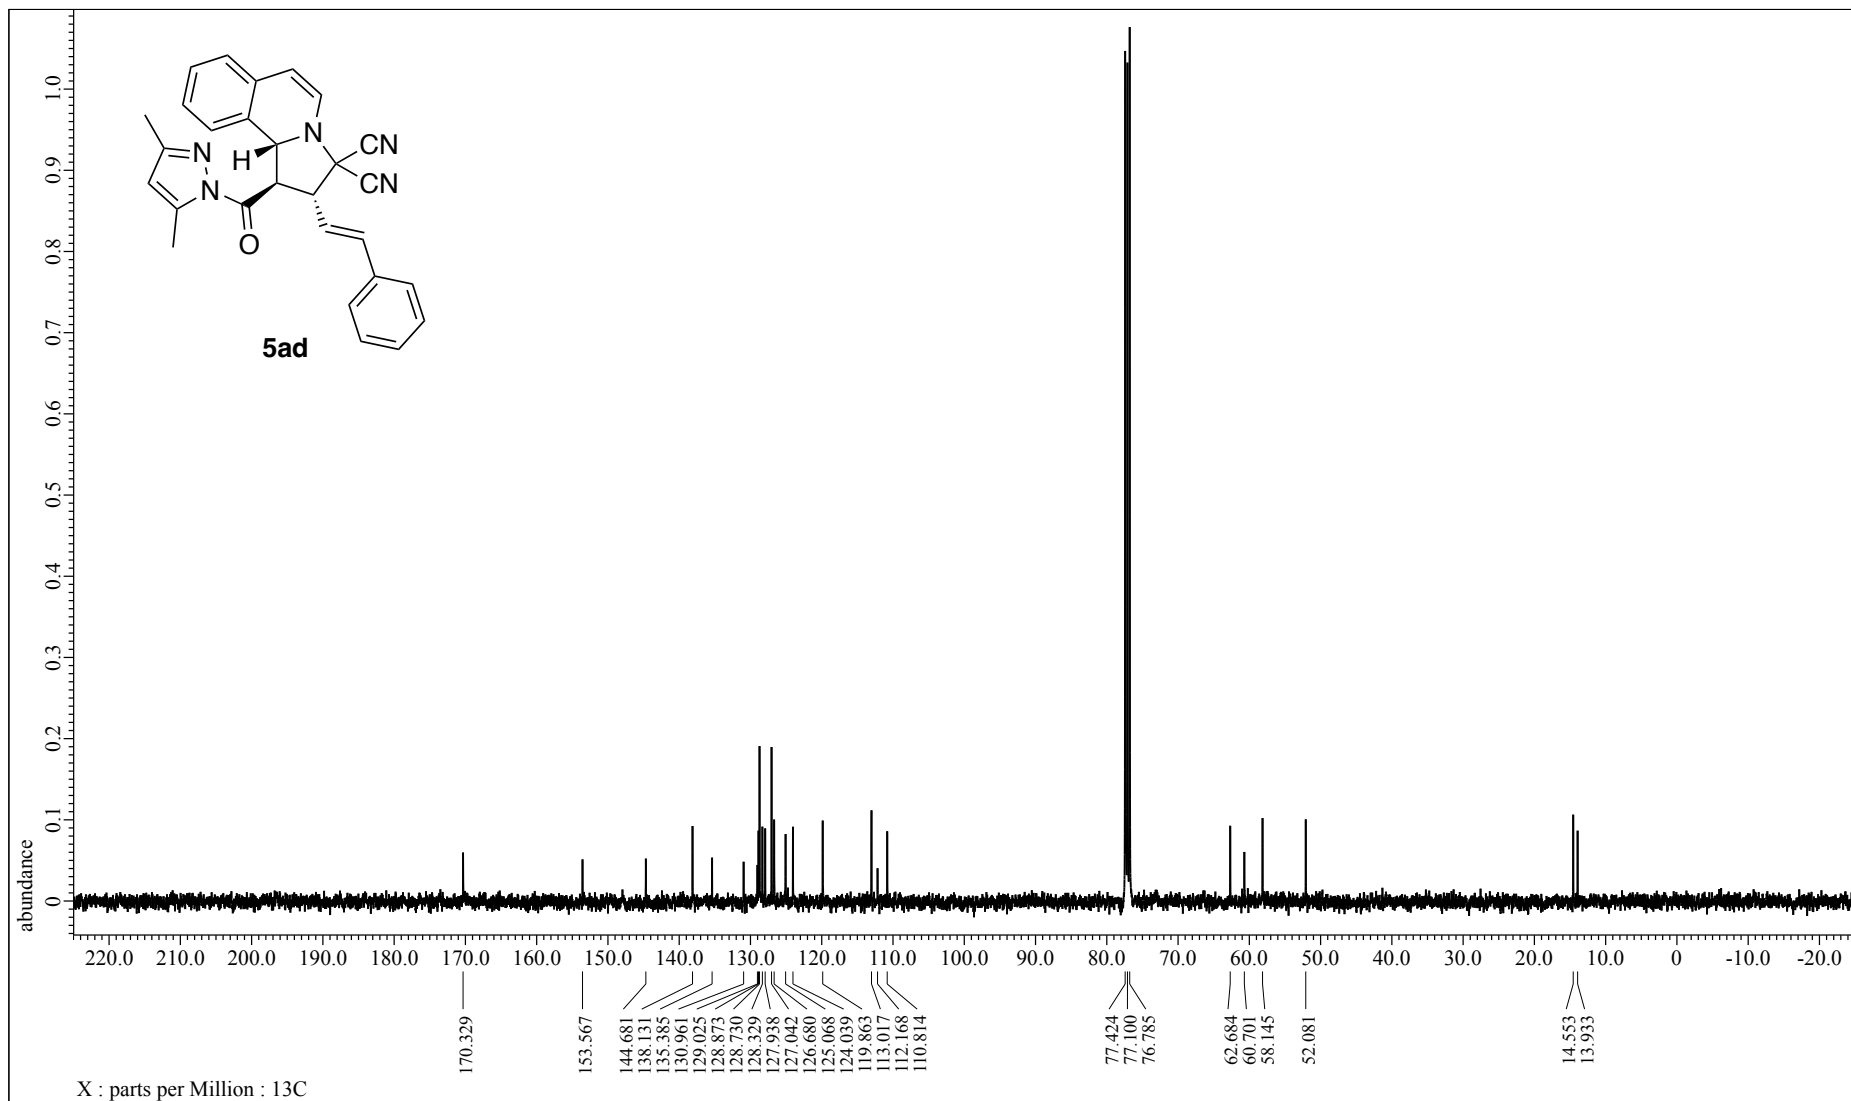

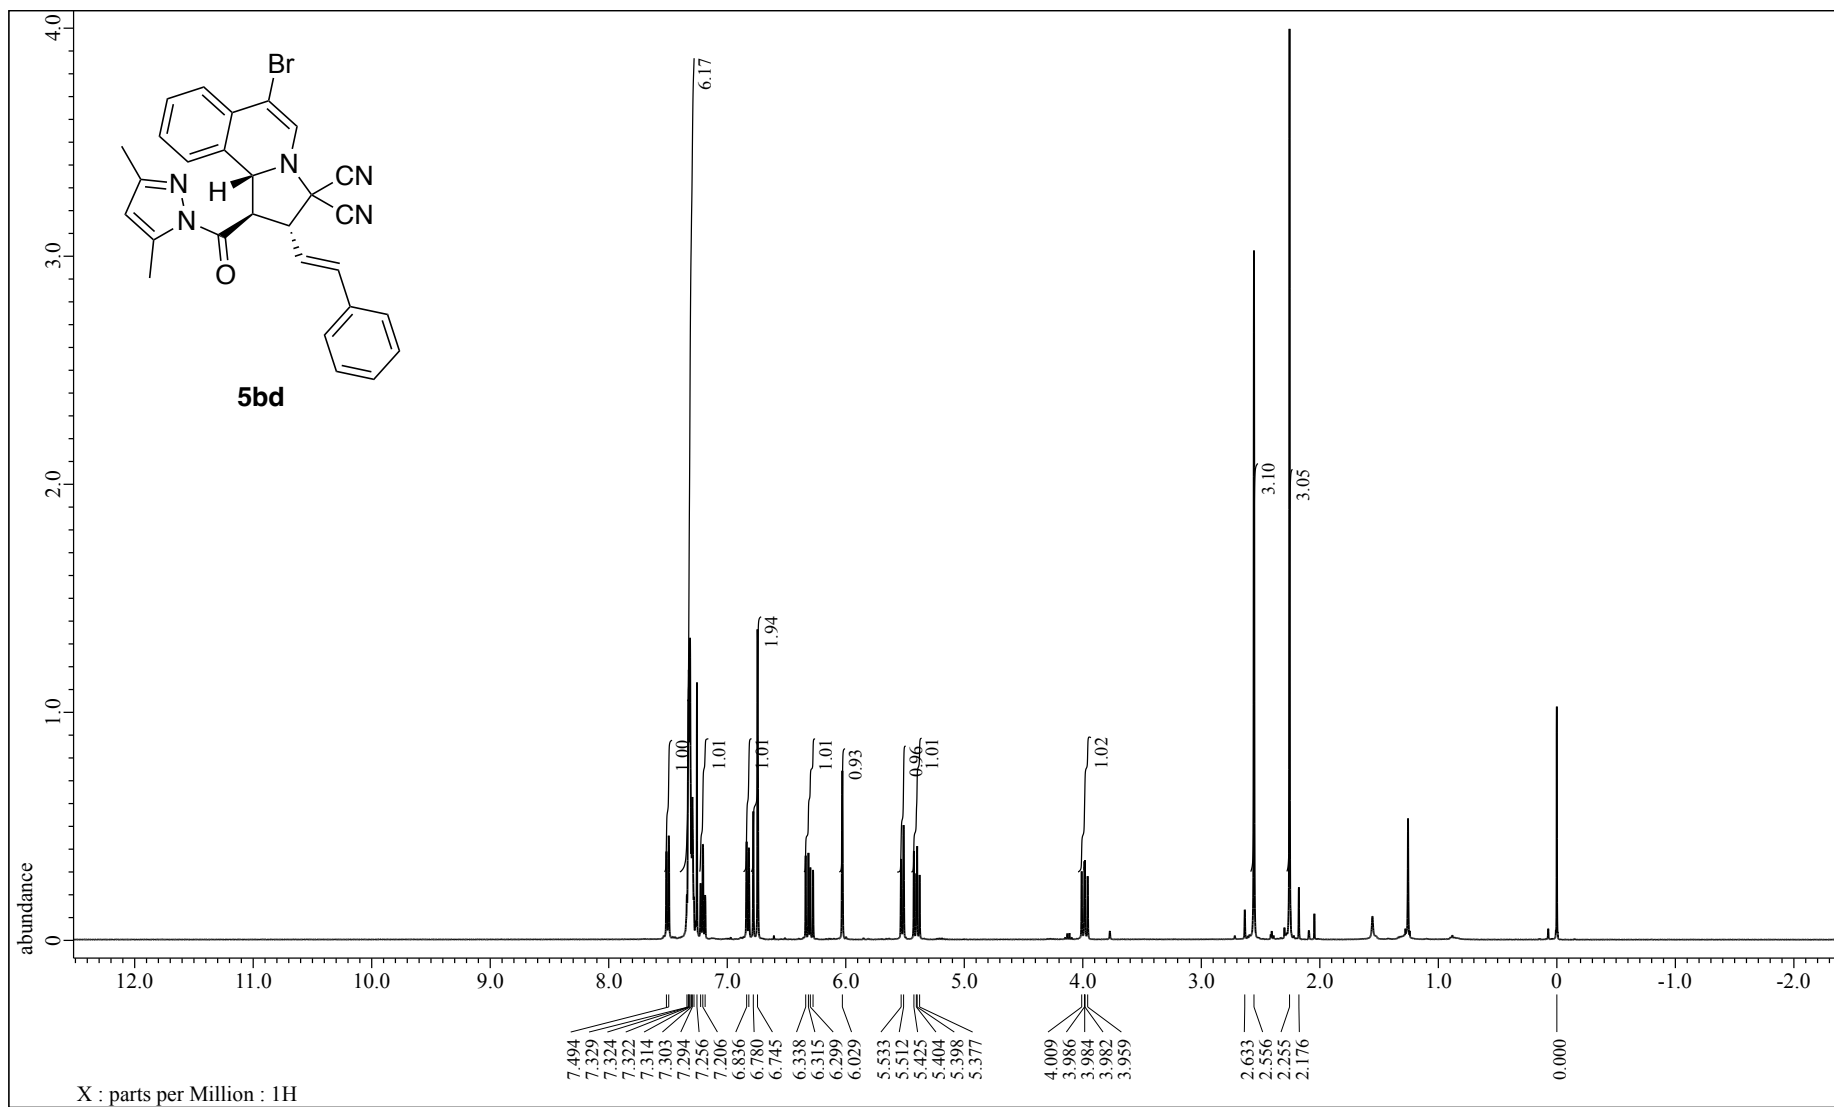

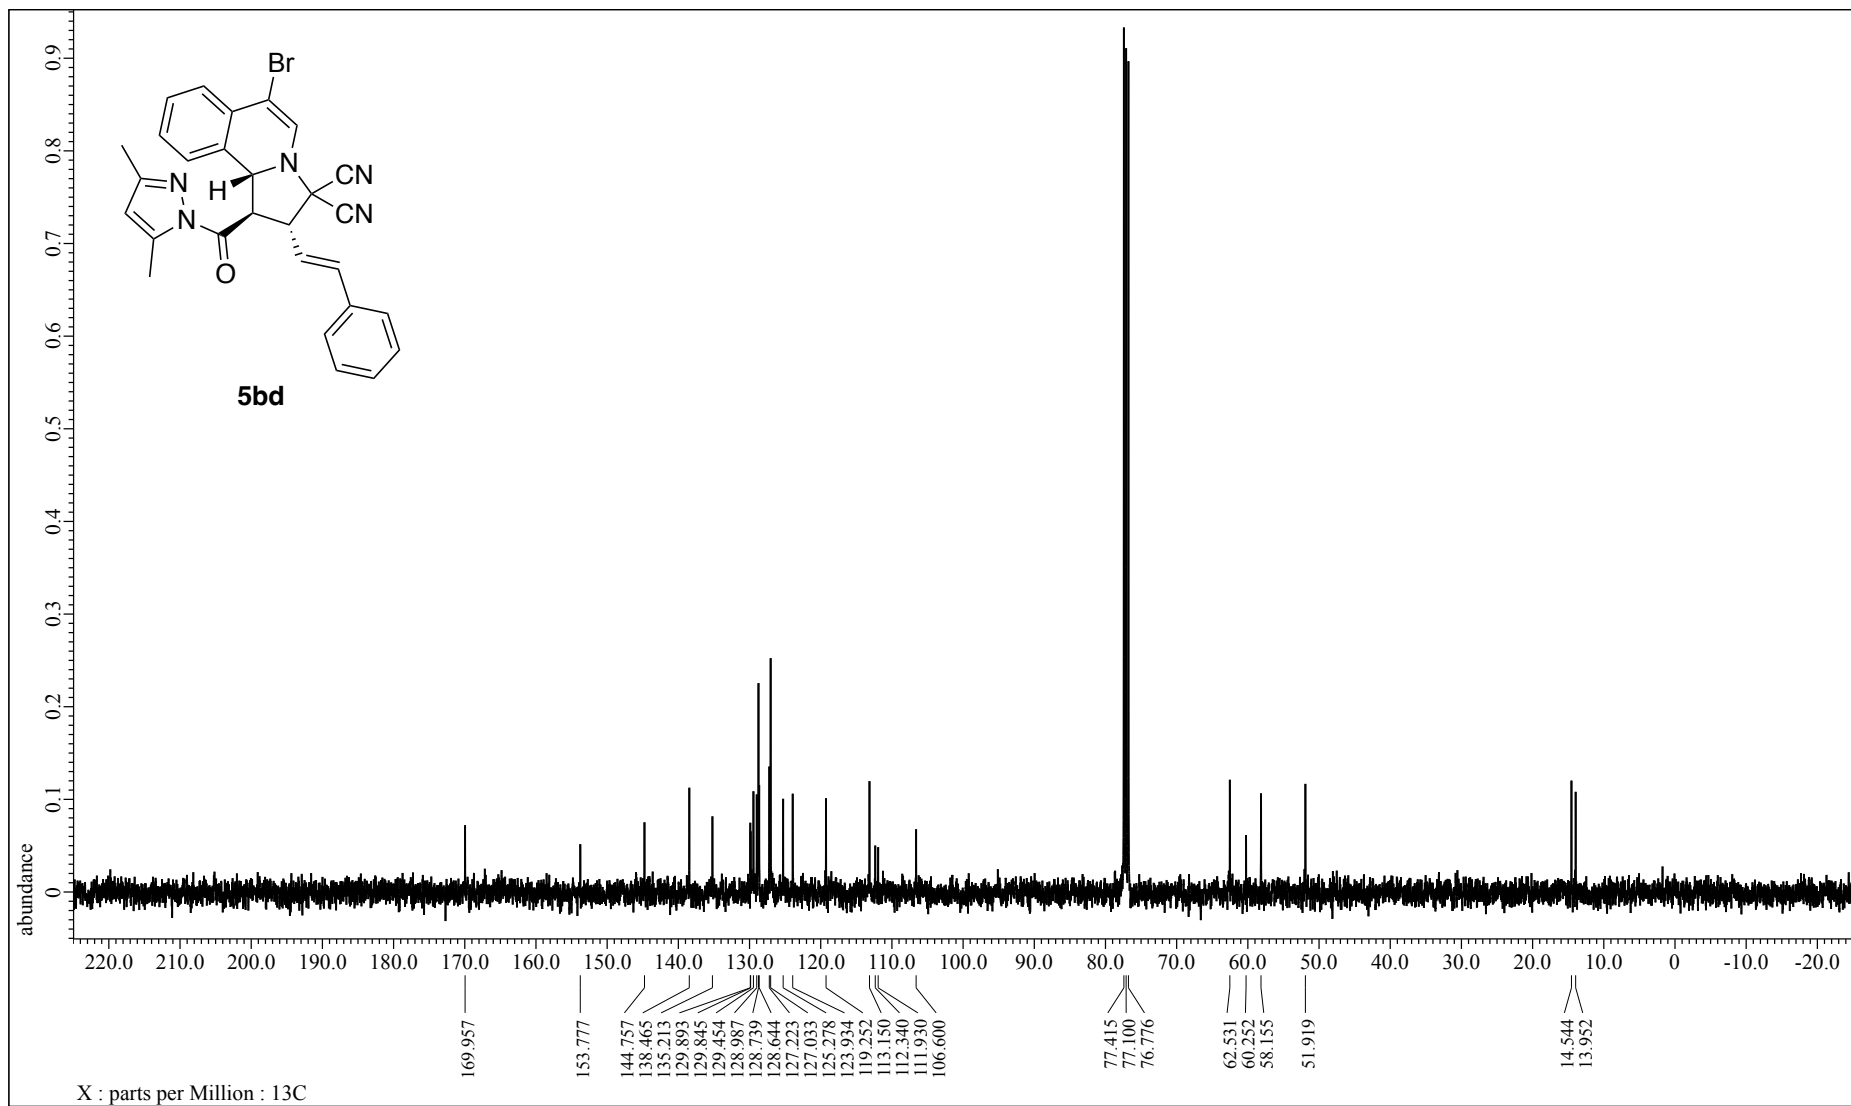

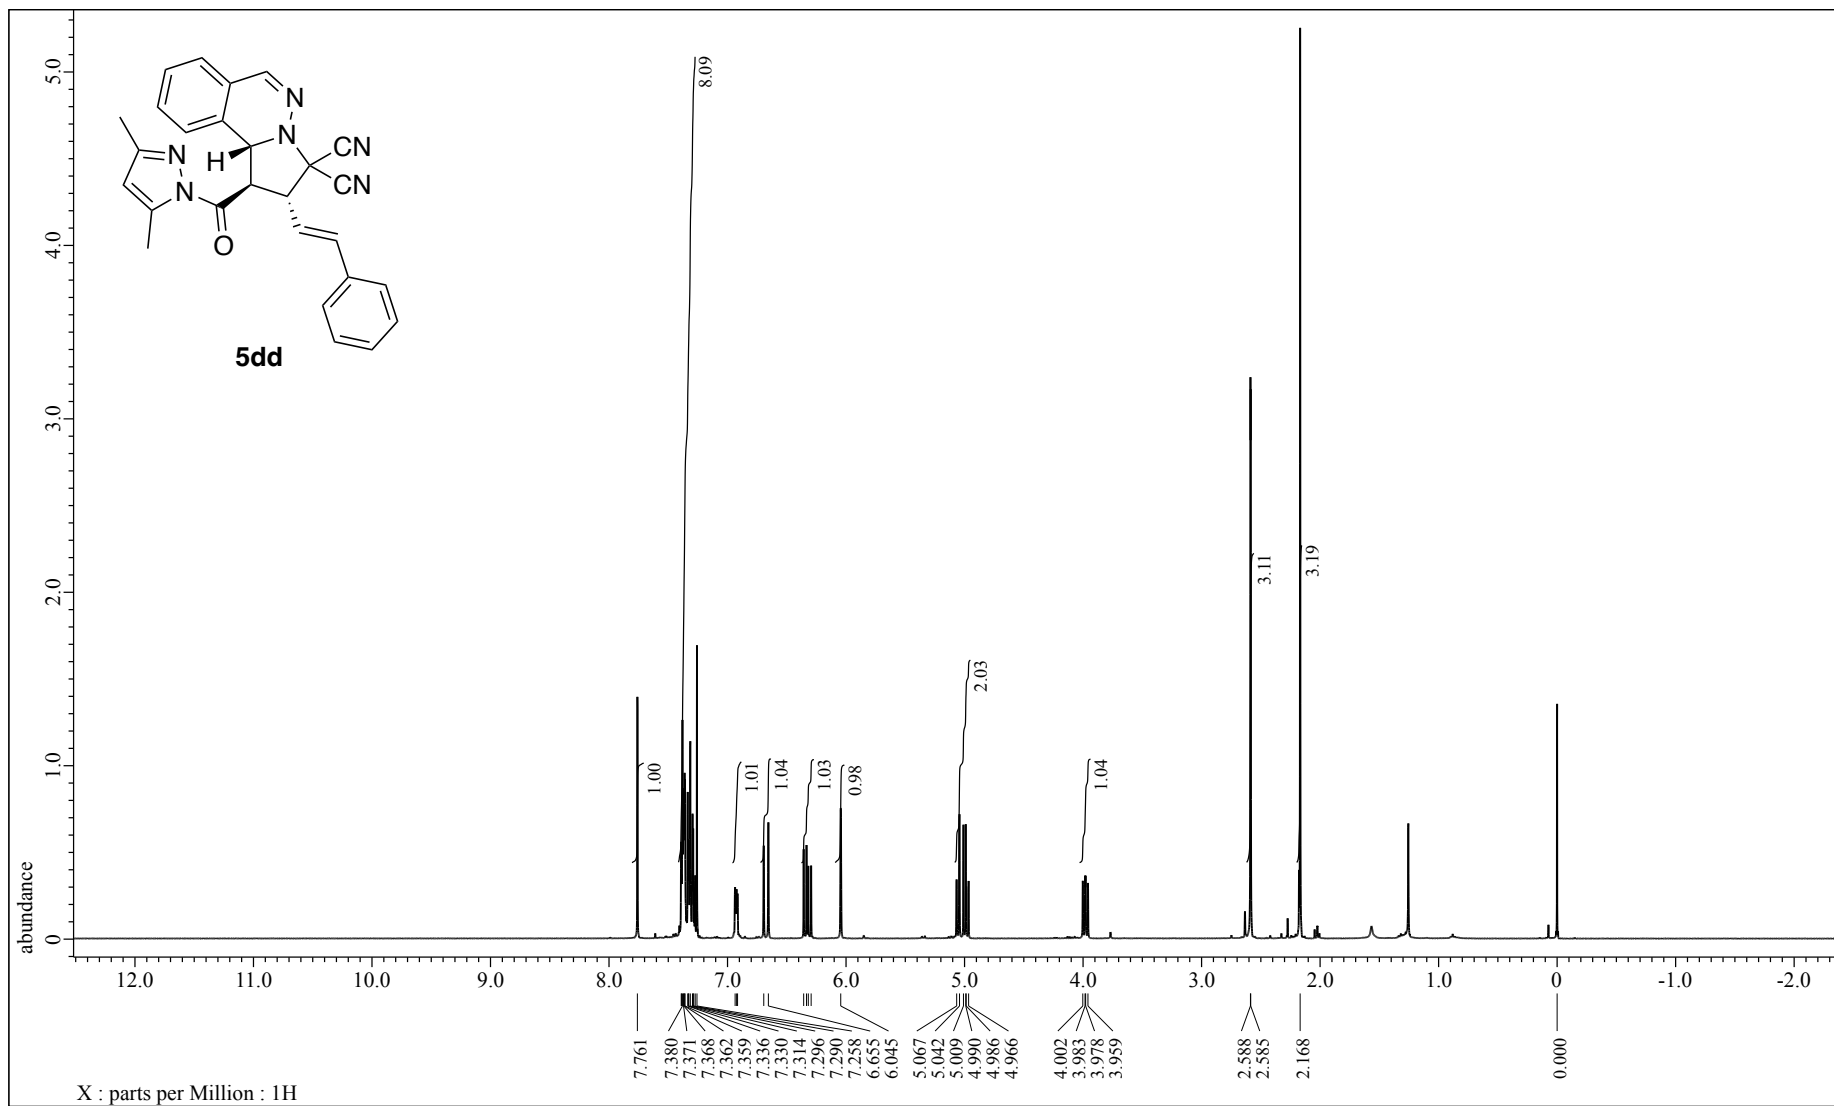

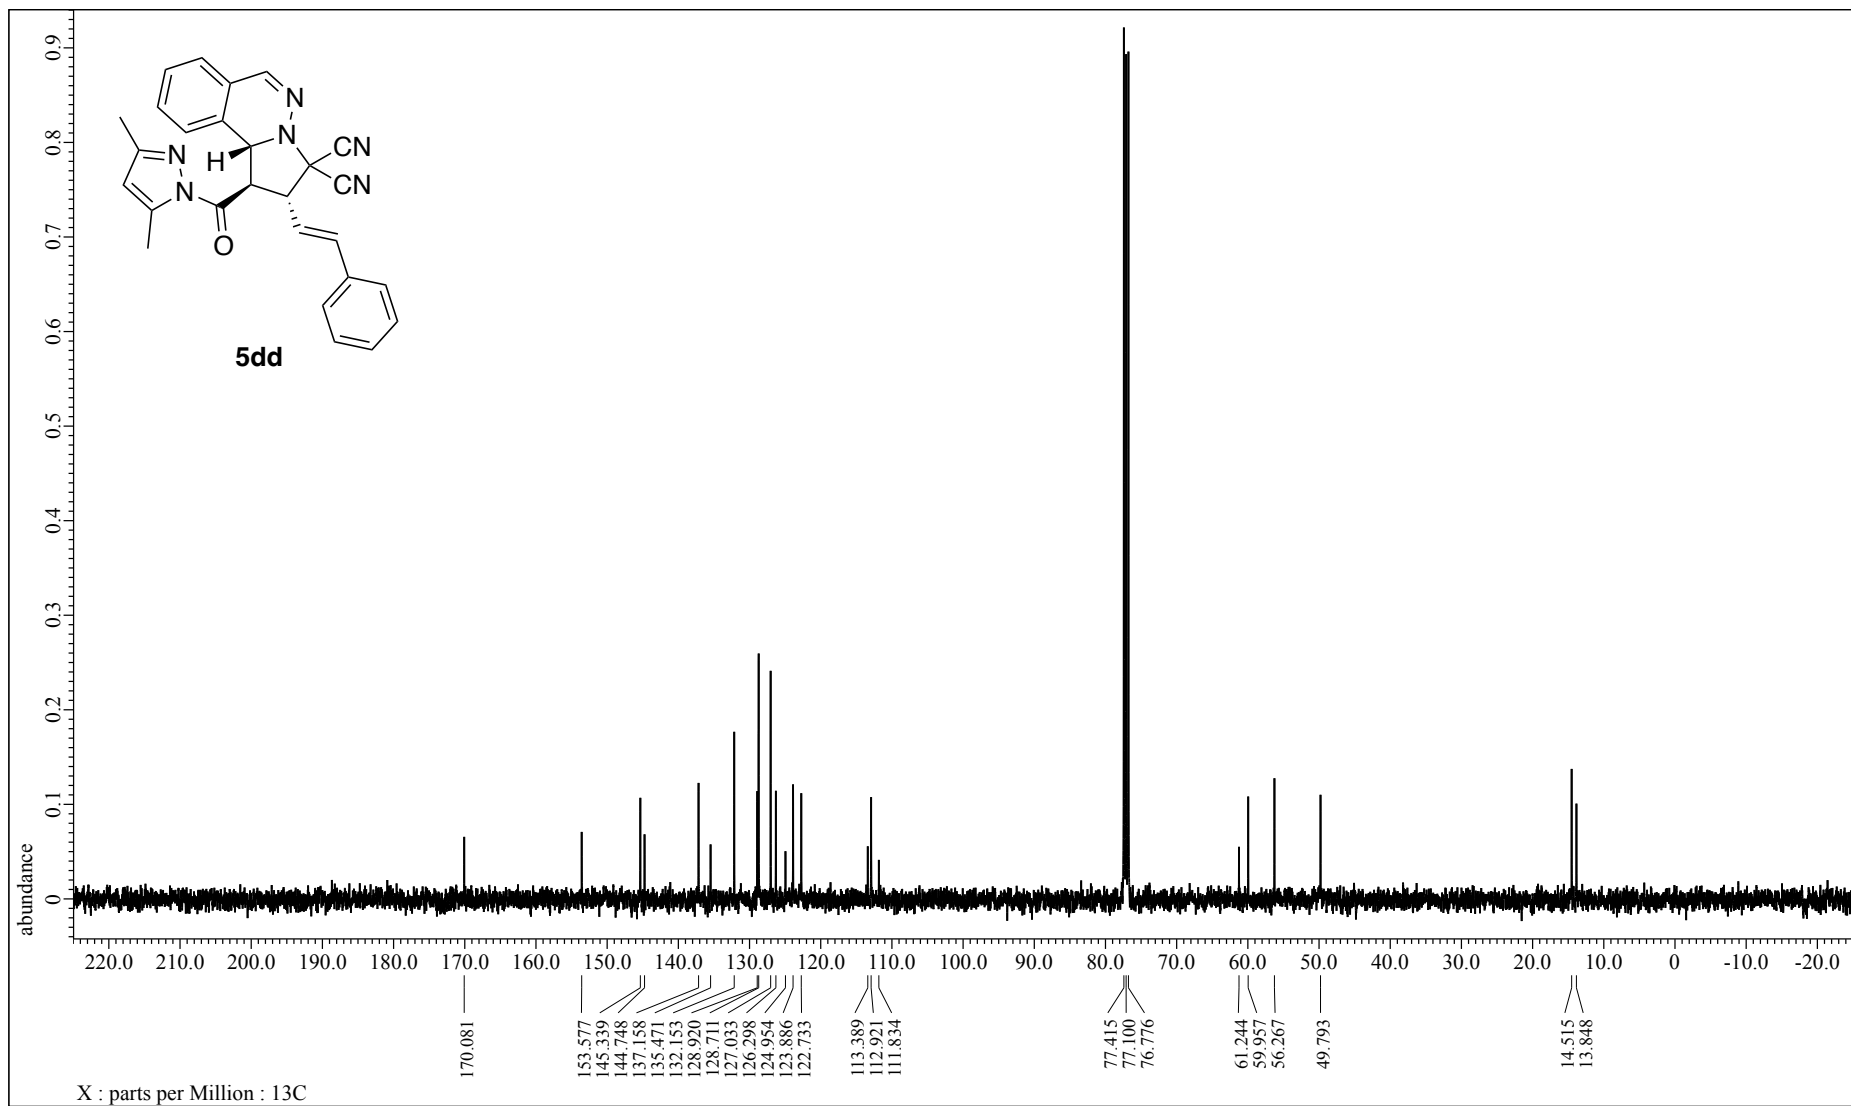

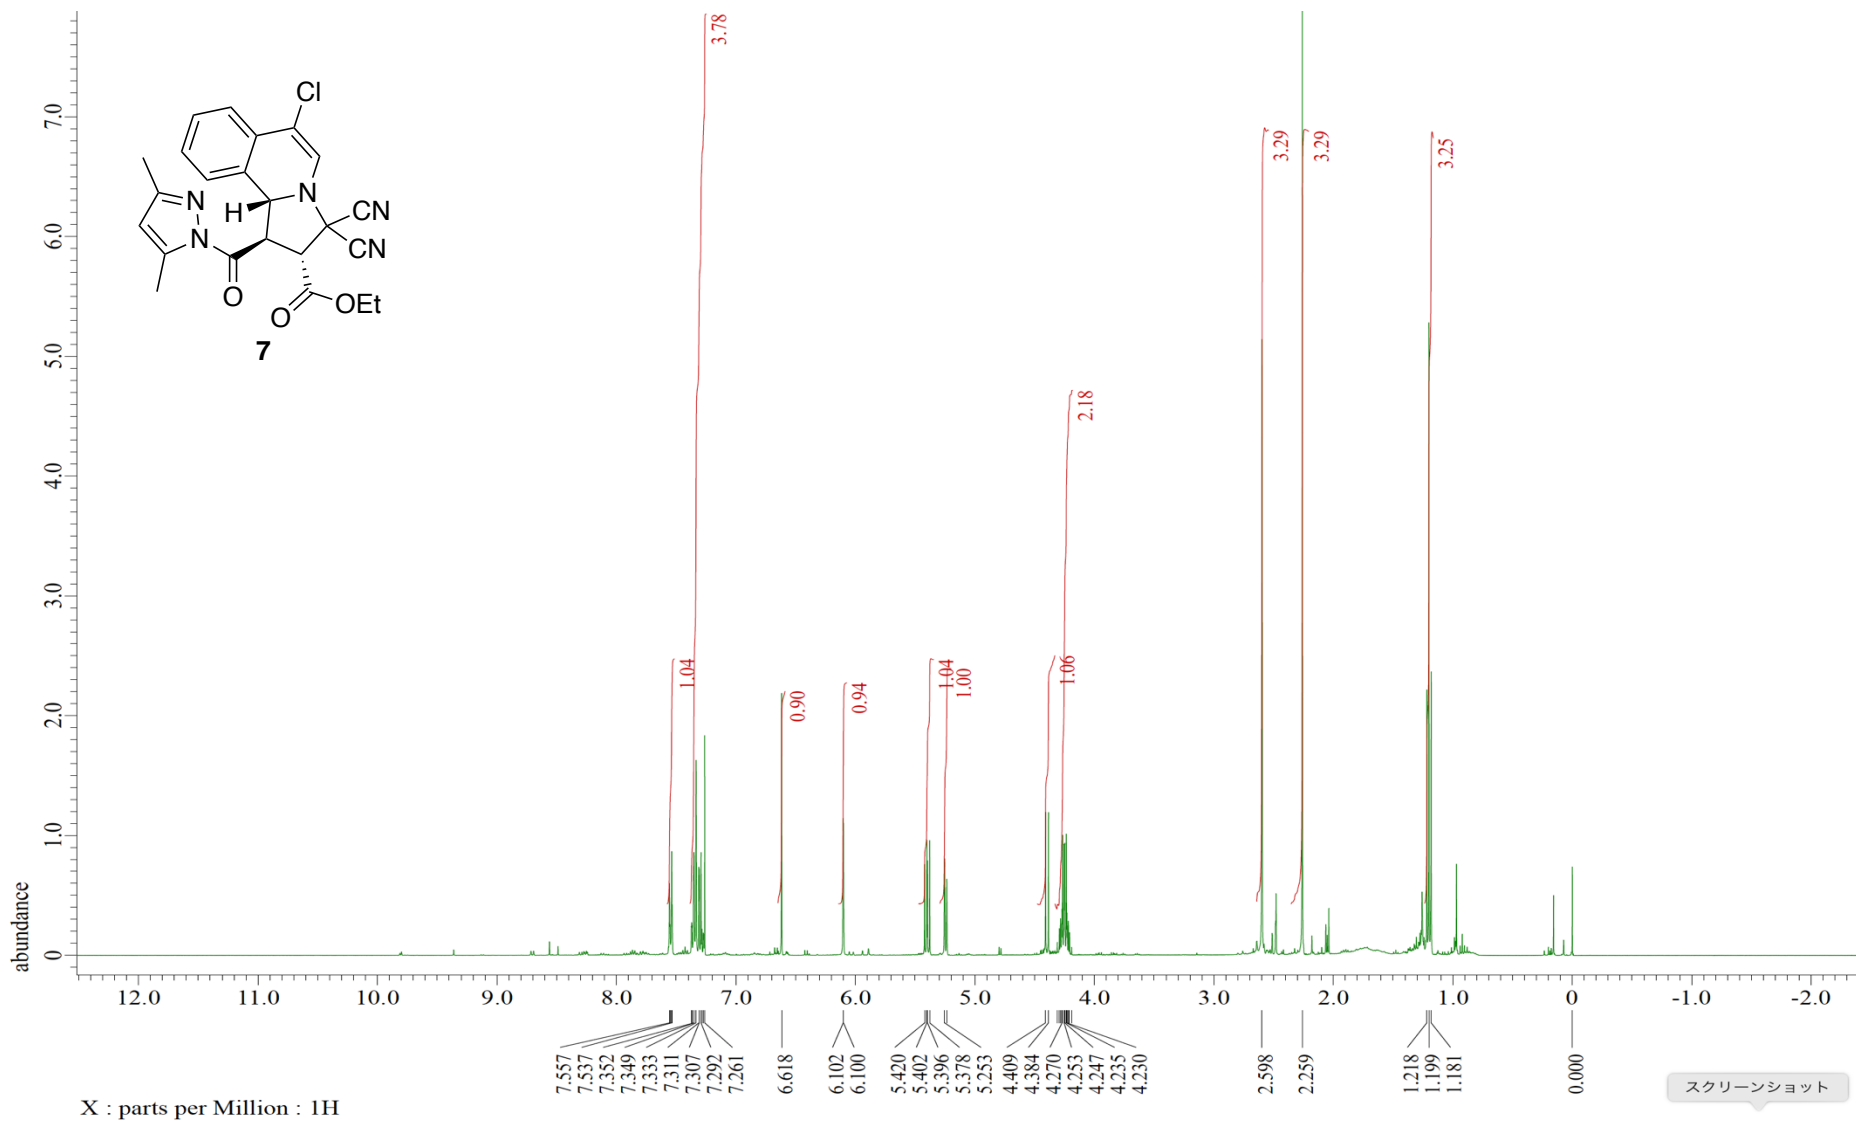

S130

スクリーンショット



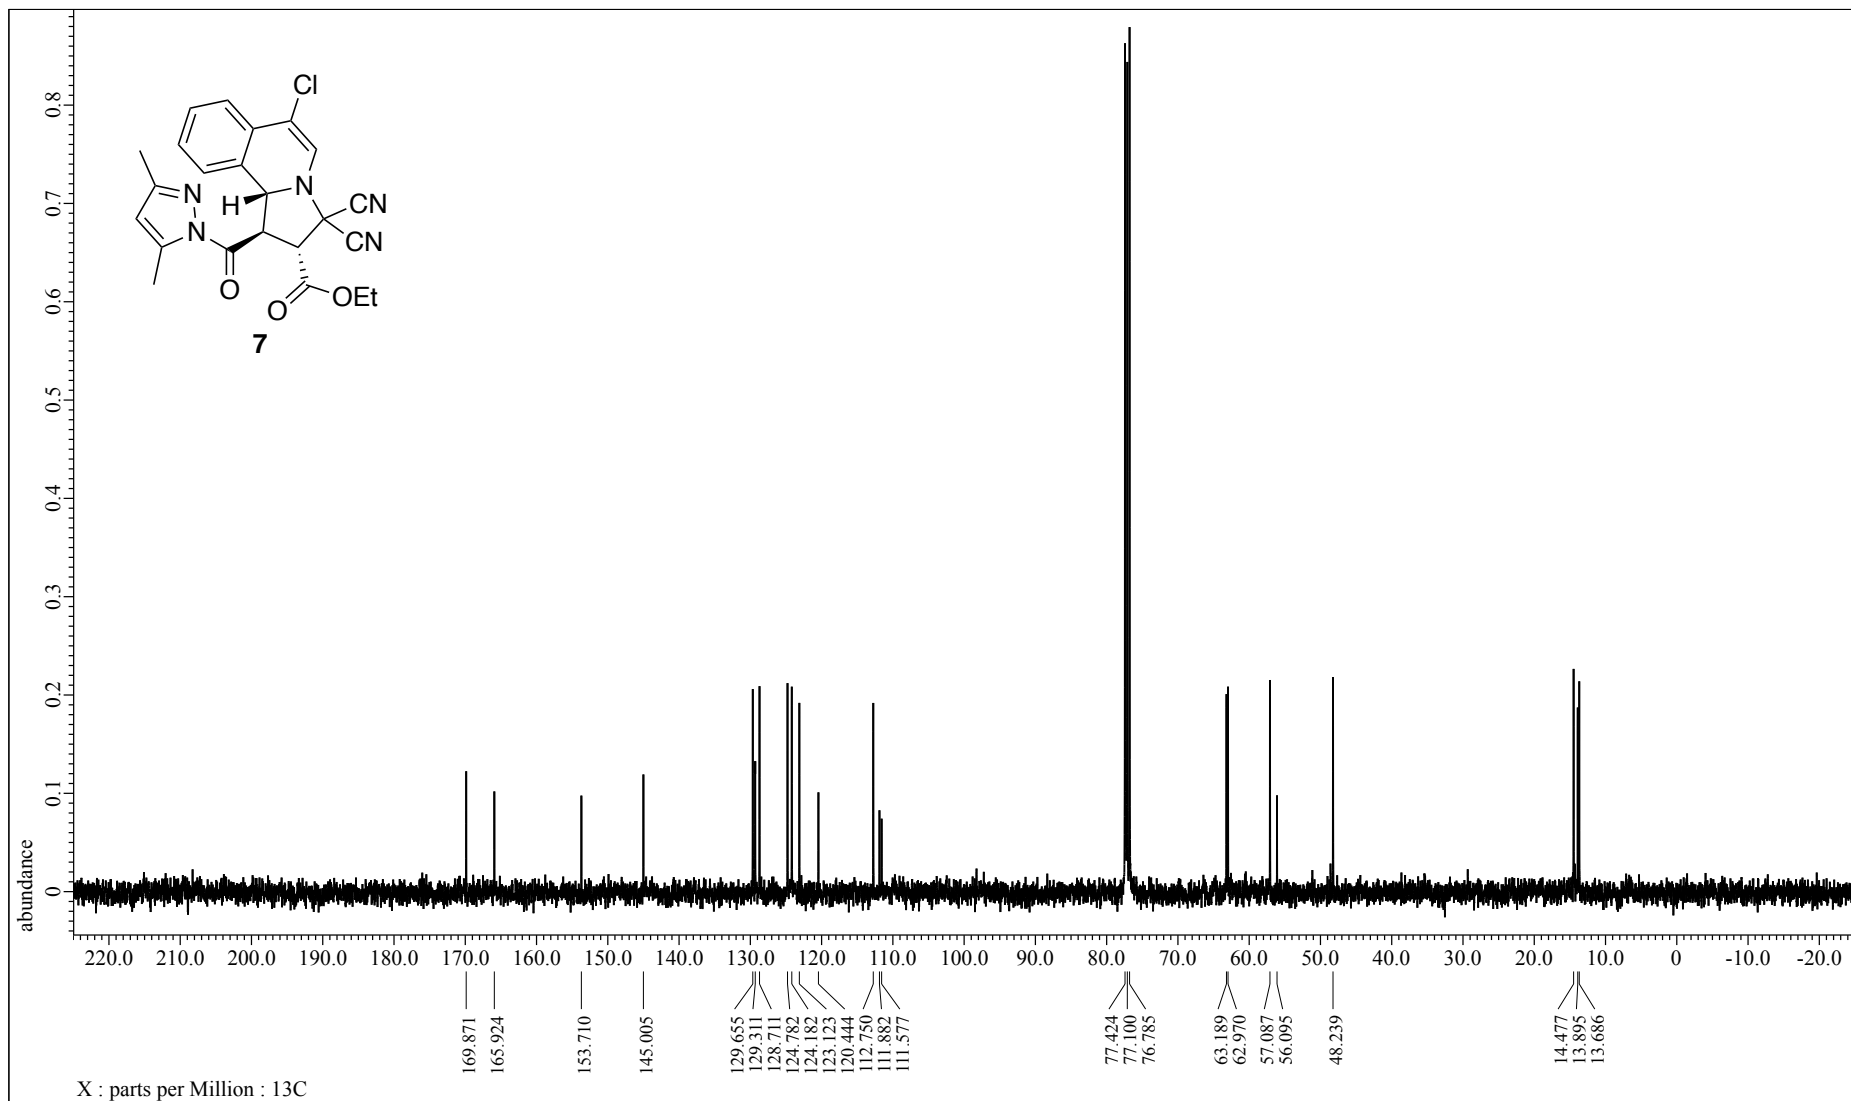

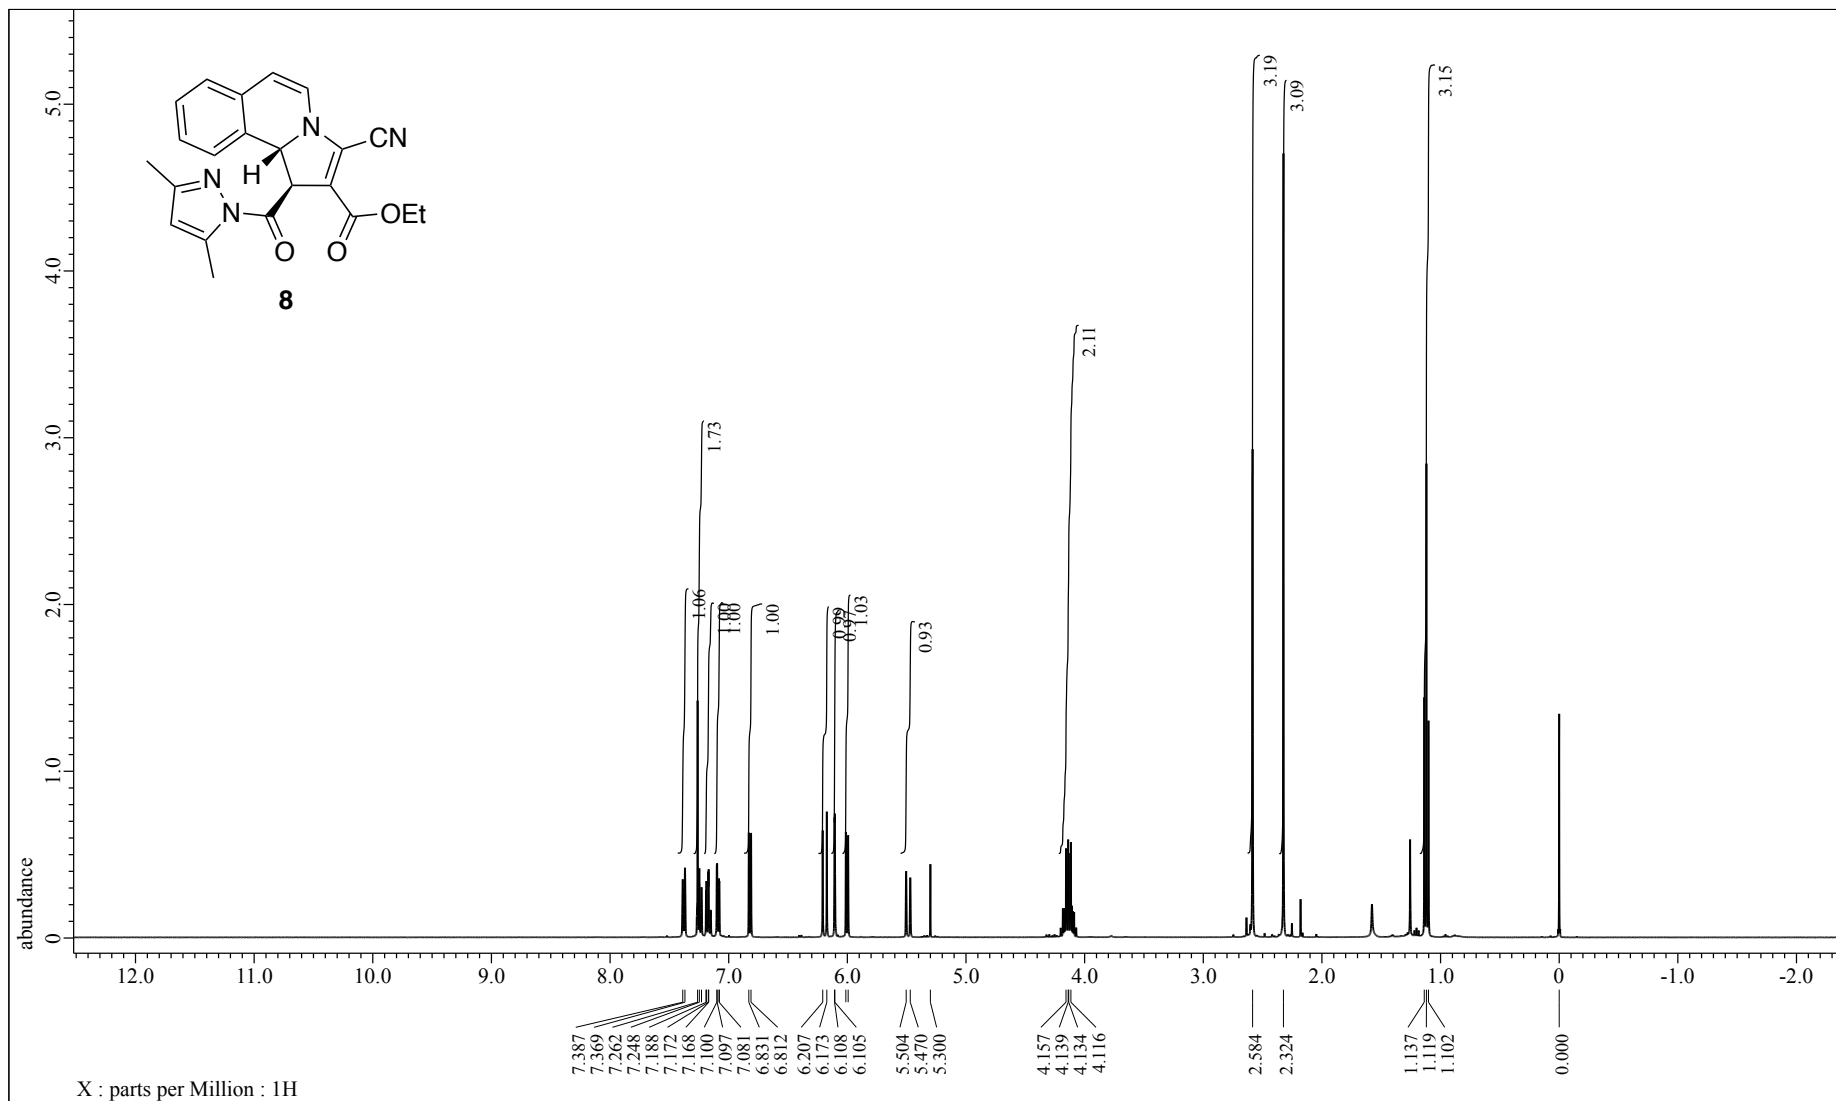

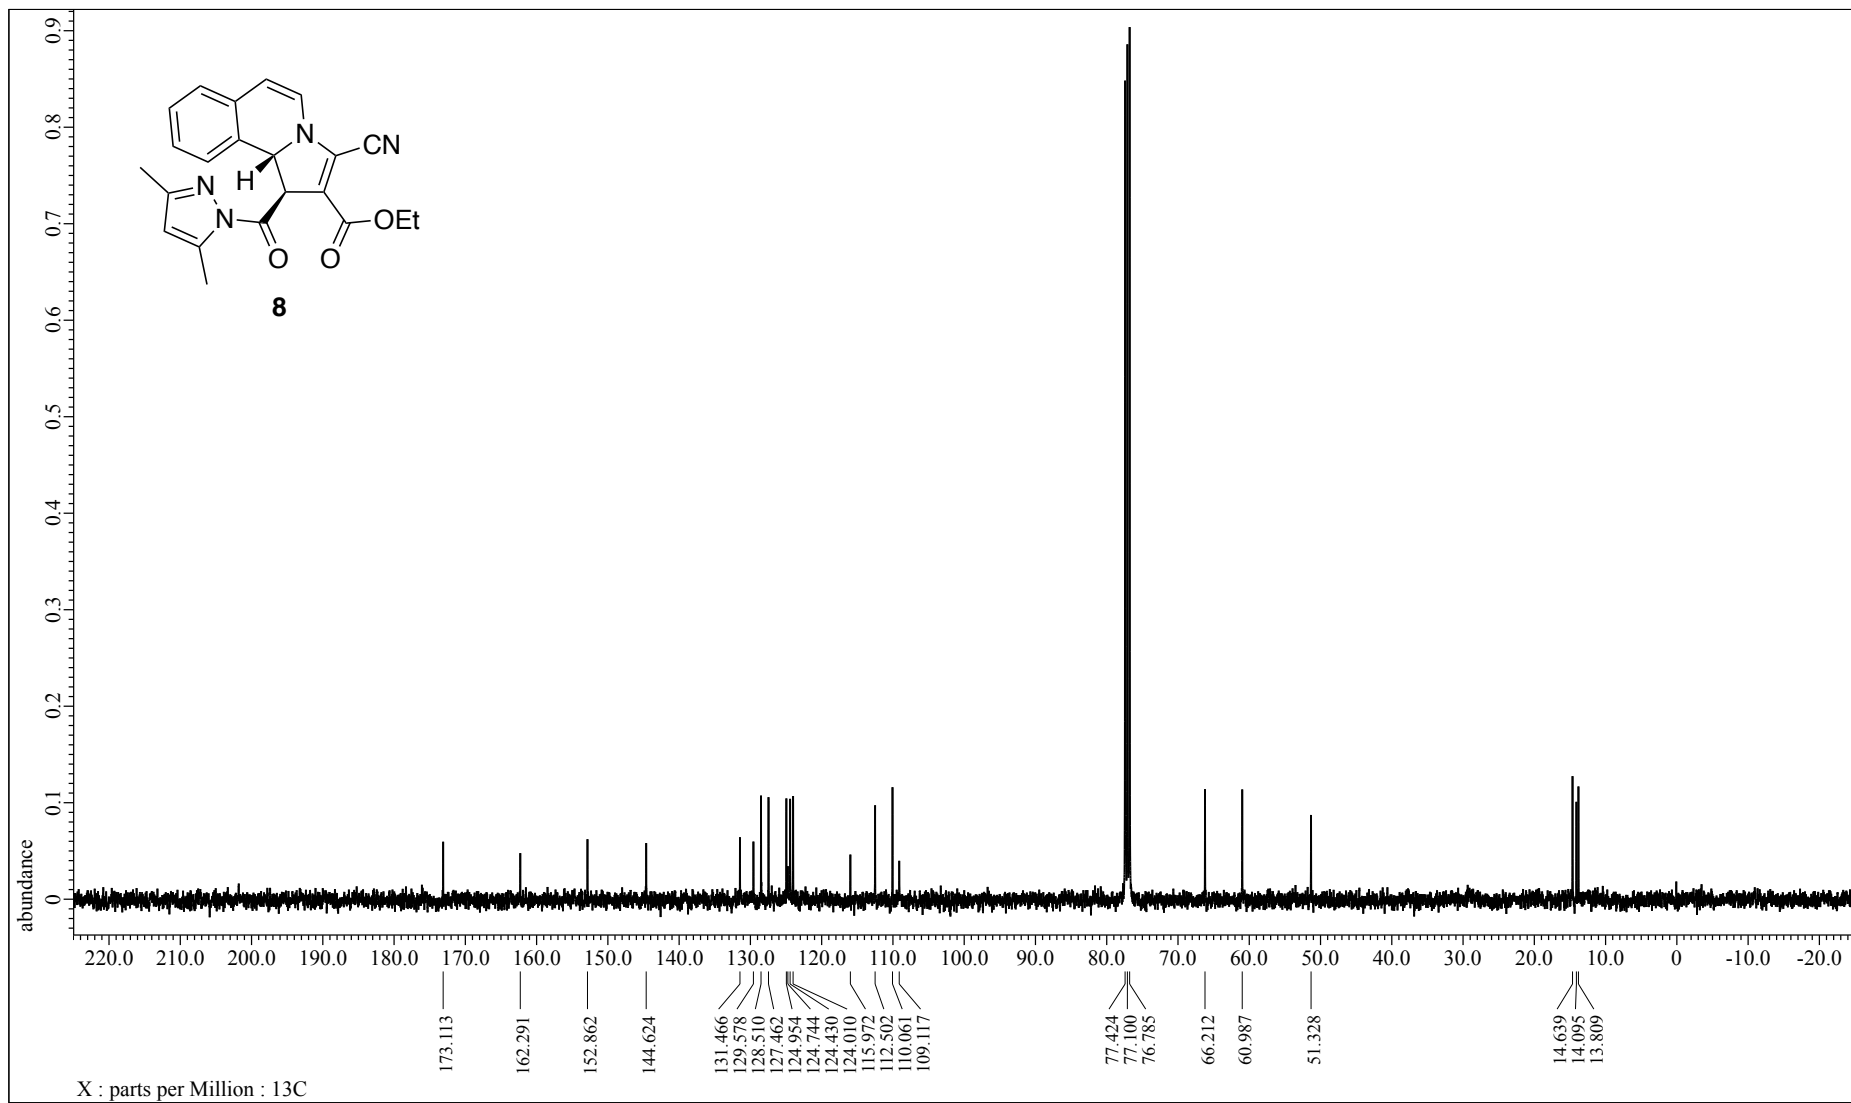

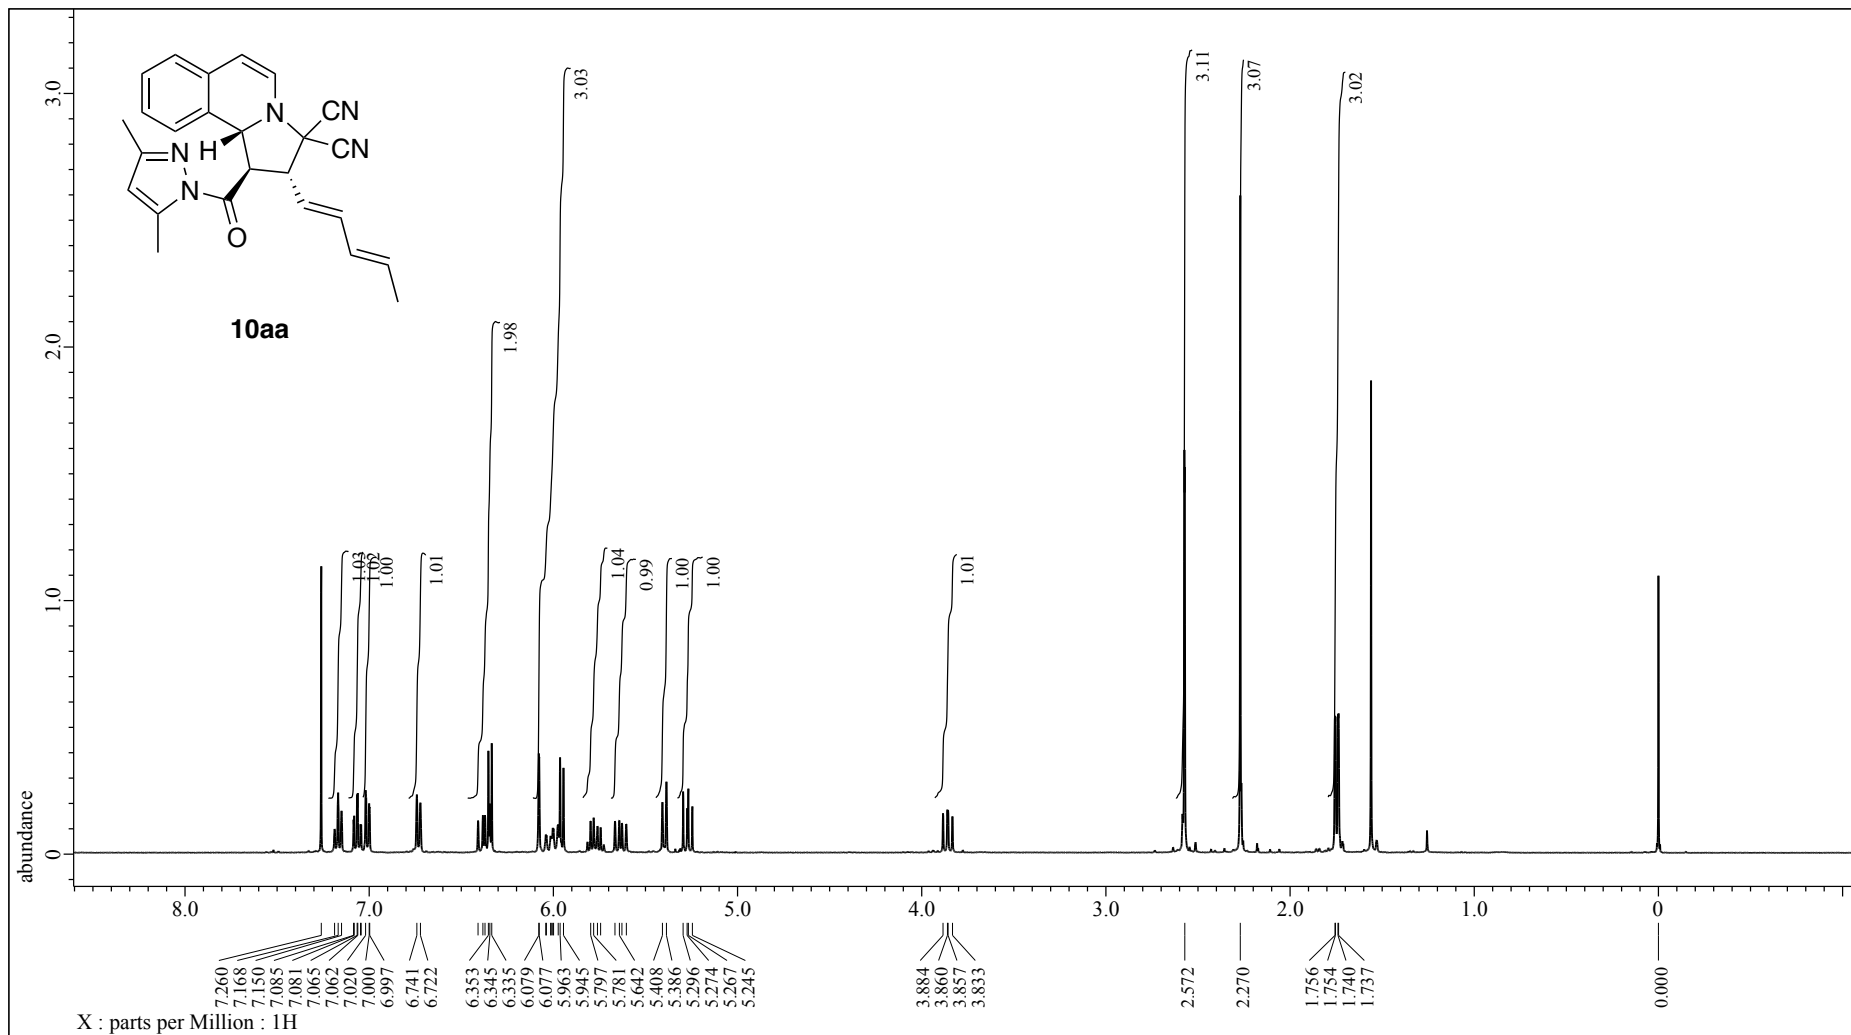

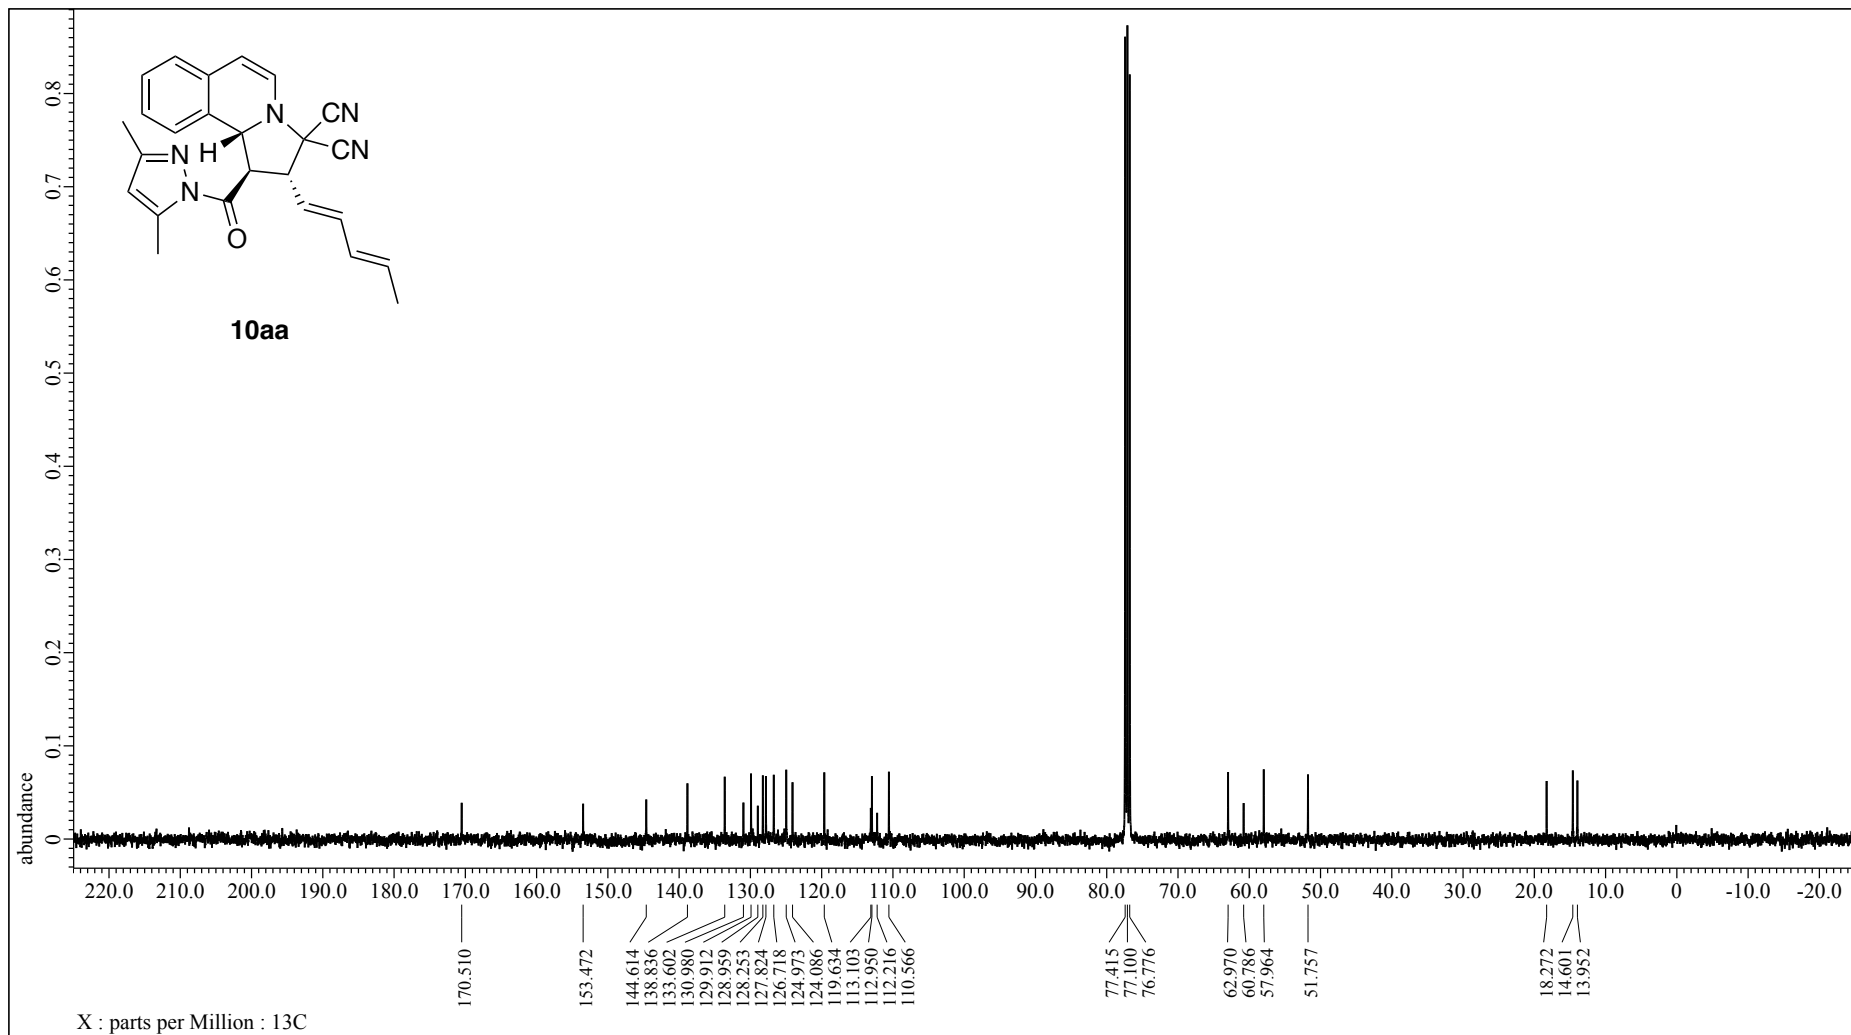

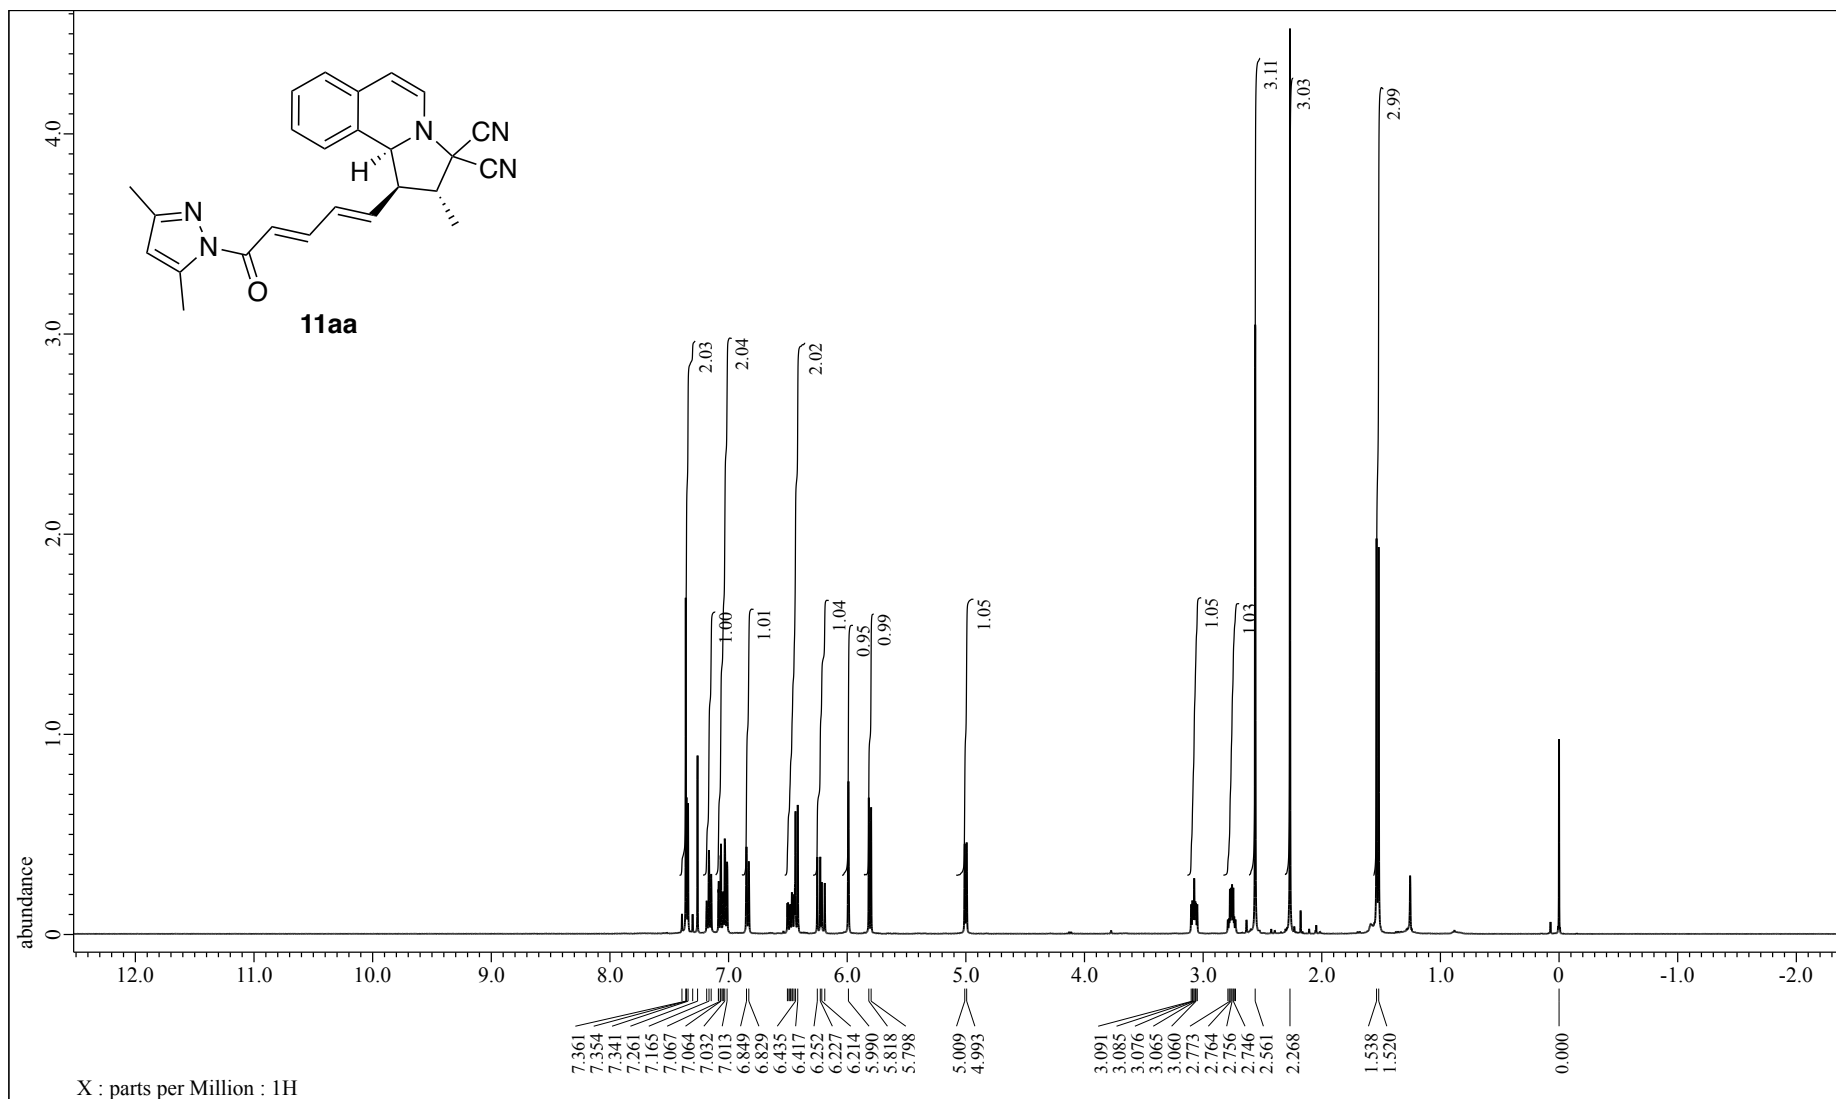

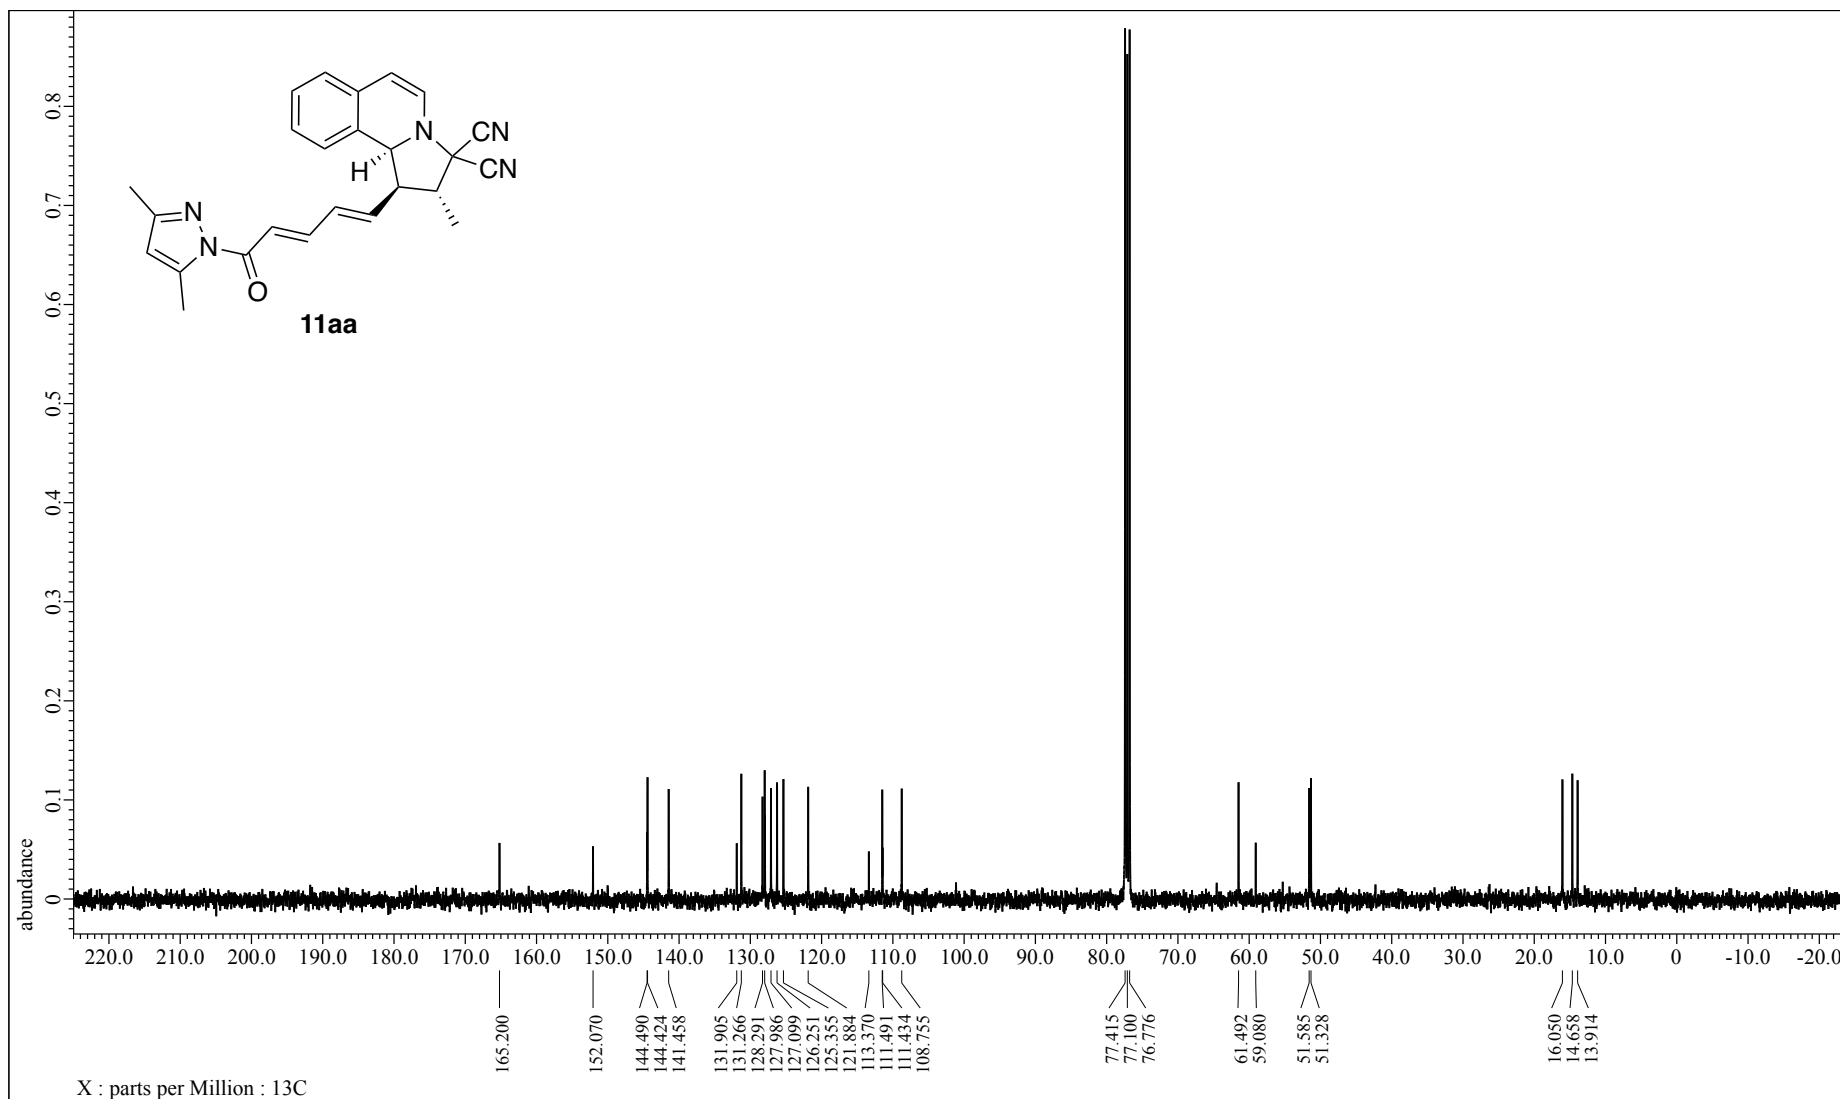

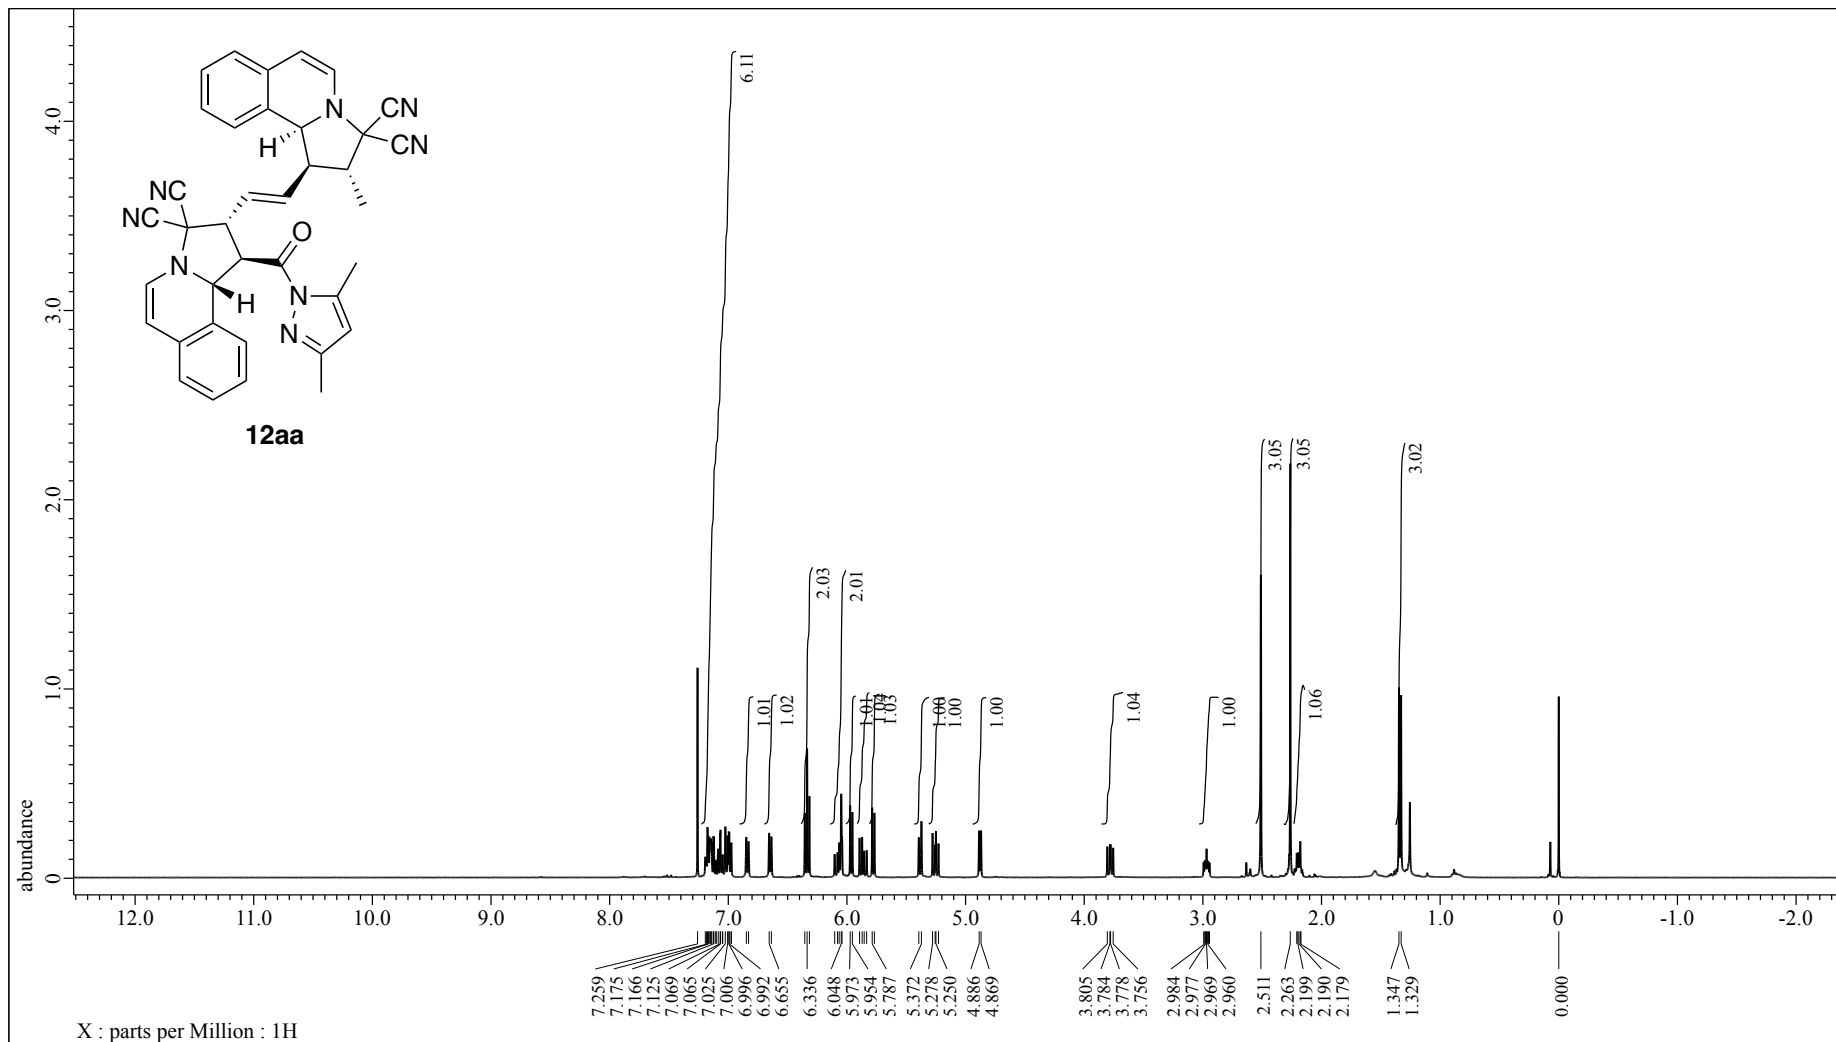



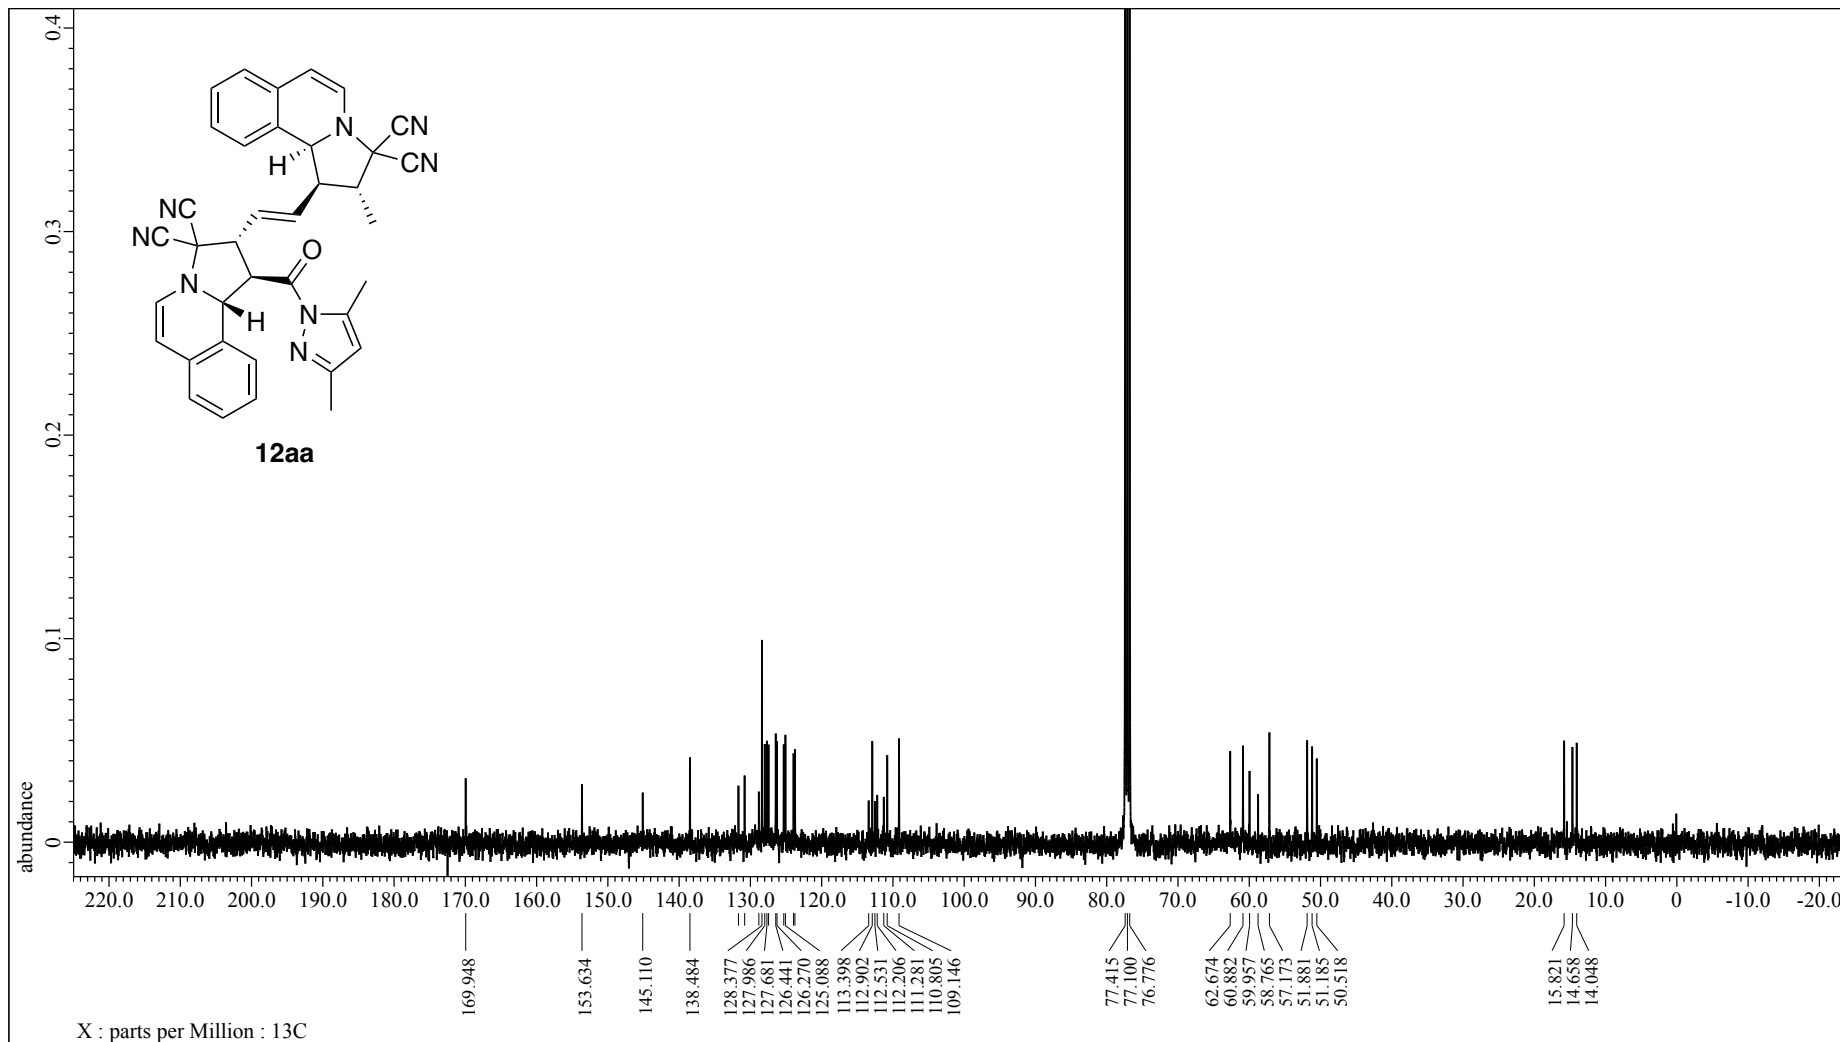

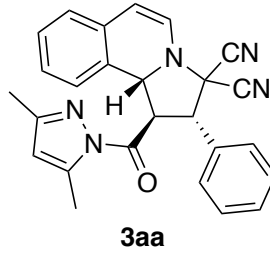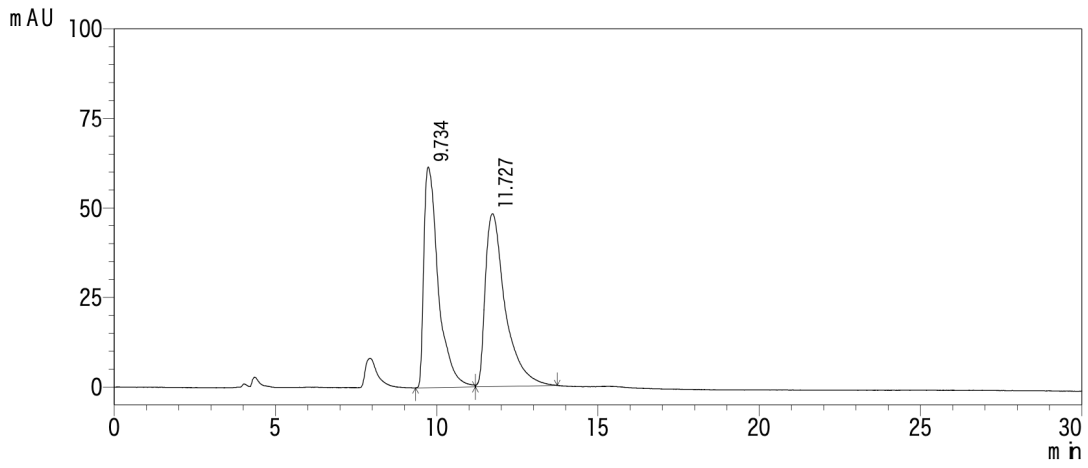

PDA Ch1 210nm

| Peak No. | RT (min) | Area    | Height | % Area  |
|----------|----------|---------|--------|---------|
| 1        | 9.734    | 1914563 | 61589  | 48.066  |
| 2        | 11.727   | 2068602 | 48236  | 51.934  |
| Total    |          | 3983165 | 109825 | 100.000 |

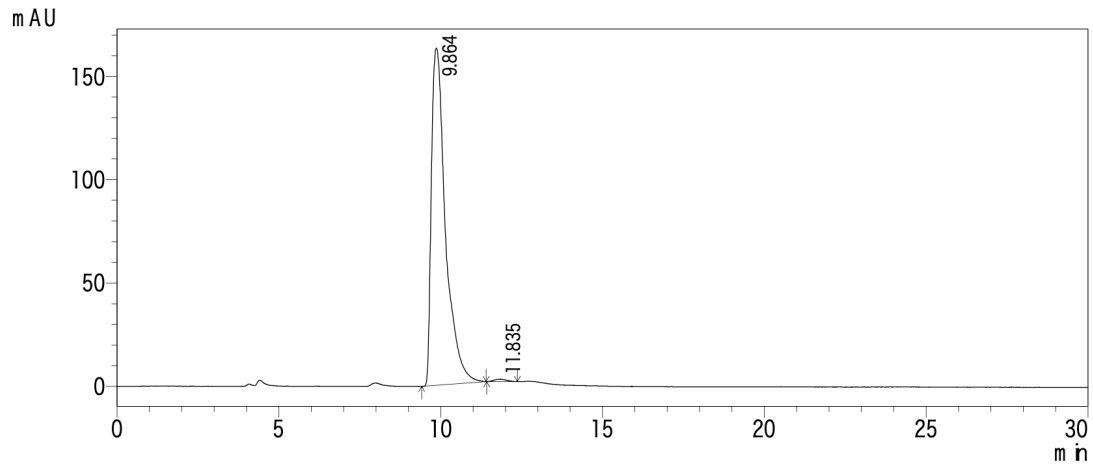

PDA Ch1 210nm

| Peak No. | RT (min) | Area    | Height | % Area  |
|----------|----------|---------|--------|---------|
| 1        | 9.864    | 4941380 | 163371 | 99.369  |
| 2        | 11.835   | 31381   | 1154   | 0.631   |
| Total    |          | 4972761 | 164526 | 100.000 |

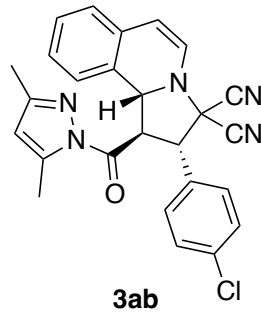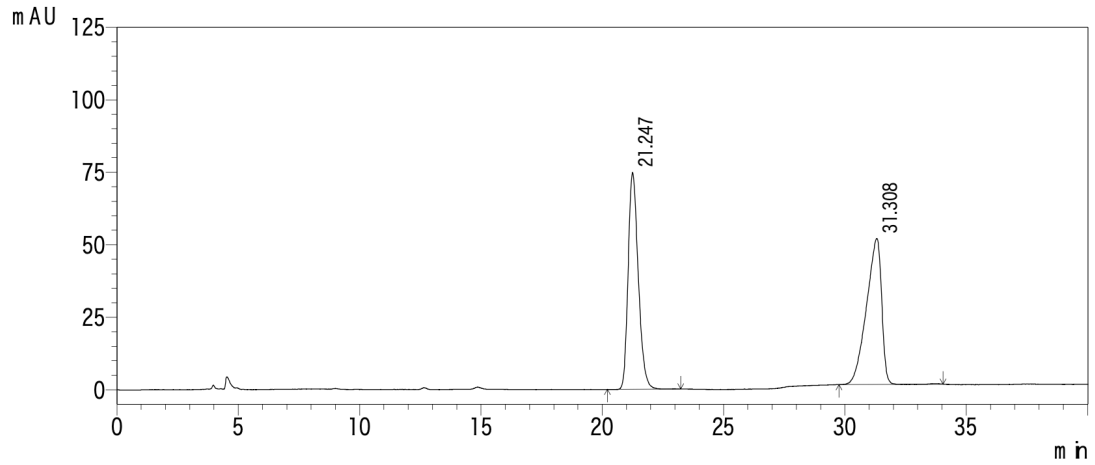

PDA Ch1 210nm

| Peak No. | RT (m in) | Area    | Height | % Area  |
|----------|-----------|---------|--------|---------|
| 1        | 21.247    | 2164505 | 74719  | 49.831  |
| 2        | 31.308    | 2179162 | 50276  | 50.169  |
| Total    |           | 4343668 | 124995 | 100.000 |

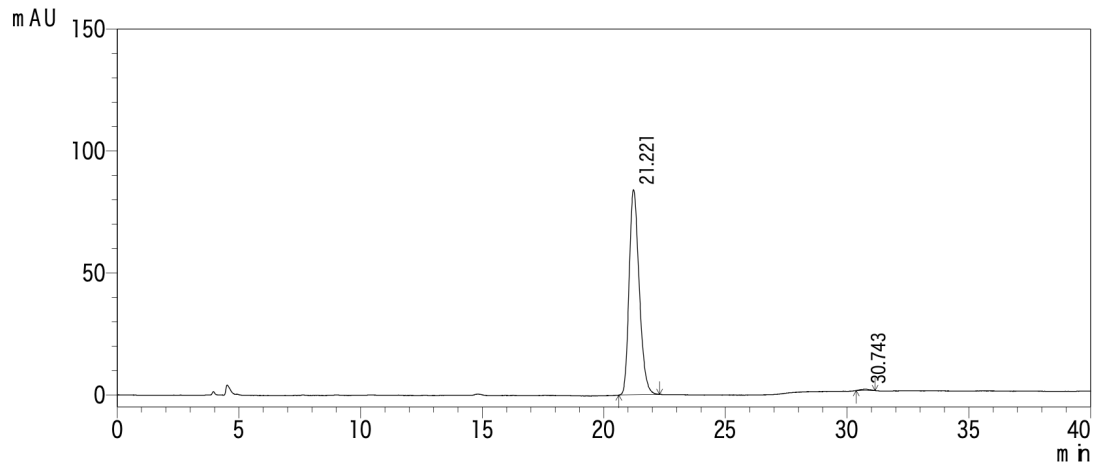

PDA Ch1 210nm

| Peak No. | RT (m in) | Area    | Height | % Area  |
|----------|-----------|---------|--------|---------|
| 1        | 21.221    | 2418761 | 84095  | 99.373  |
| 2        | 30.743    | 15249   | 590    | 0.627   |
| Total    |           | 2434011 | 84685  | 100.000 |

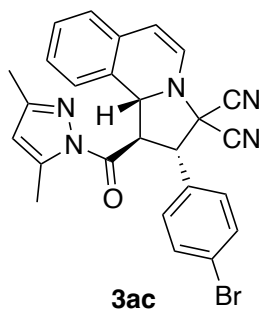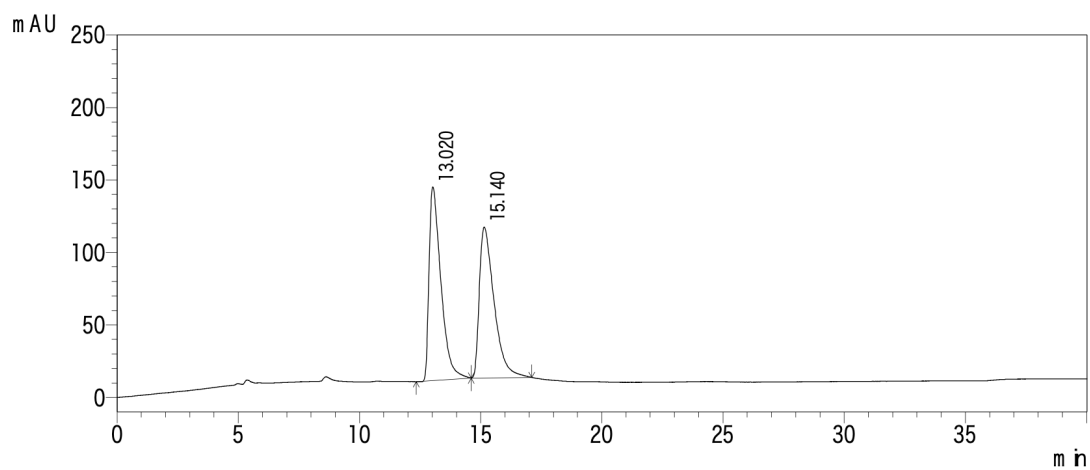

PDA Ch1 210nm

| Peak No. | RT (m in) | Area    | Height | % Area  |
|----------|-----------|---------|--------|---------|
| 1        | 13.020    | 4525516 | 133518 | 50.740  |
| 2        | 15.140    | 4393486 | 103935 | 49.260  |
| Total    |           | 8919002 | 237453 | 100.000 |

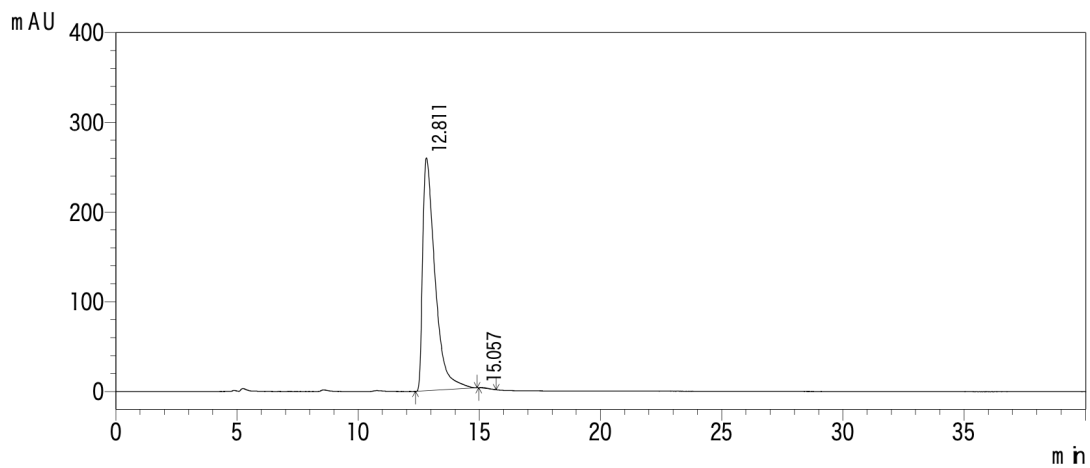

PDA Ch1 210nm

| Peak No. | RT (m in) | Area    | Height | % Area  |
|----------|-----------|---------|--------|---------|
| 1        | 12.811    | 9217153 | 259619 | 99.862  |
| 2        | 15.057    | 12736   | 426    | 0.138   |
| Total    |           | 9229889 | 260045 | 100.000 |

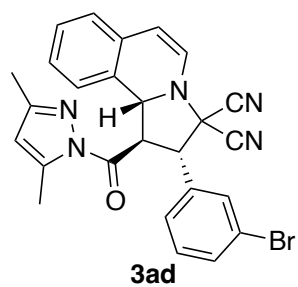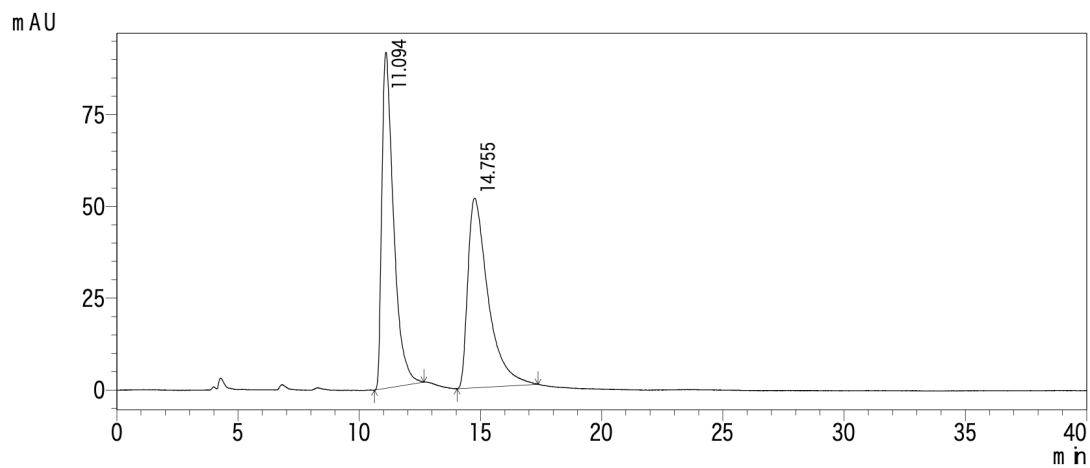

PDA Ch1 210nm

| Peak No. | RT (m in) | Area    | Height | % Area  |
|----------|-----------|---------|--------|---------|
| 1        | 11.094    | 3080545 | 91545  | 50.598  |
| 2        | 14.755    | 3007754 | 51574  | 49.402  |
| Total    |           | 6088298 | 143119 | 100.000 |

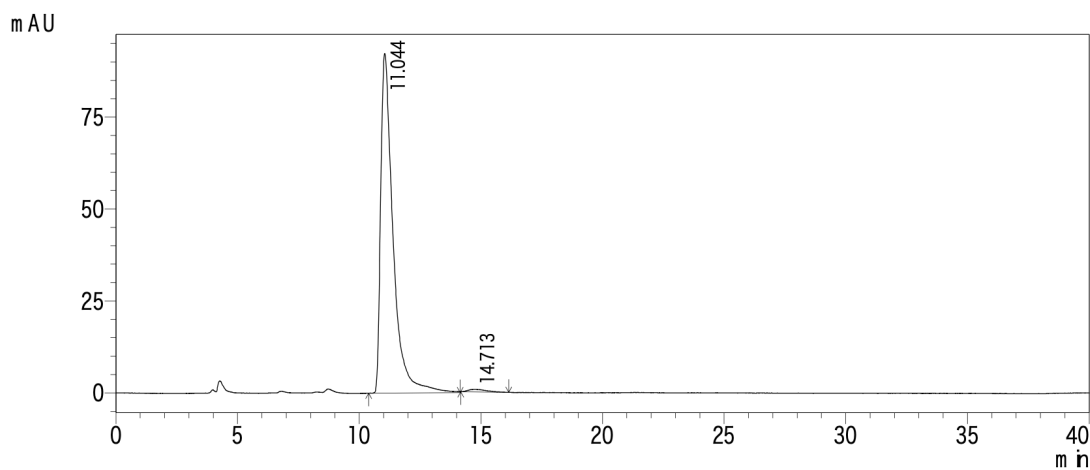

PDA Ch1 210nm

| Peak No. | RT (m in) | Area    | Height | % Area  |
|----------|-----------|---------|--------|---------|
| 1        | 11.044    | 3276476 | 92378  | 98.924  |
| 2        | 14.713    | 35626   | 729    | 1.076   |
| Total    |           | 3312101 | 93107  | 100.000 |

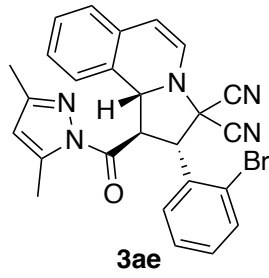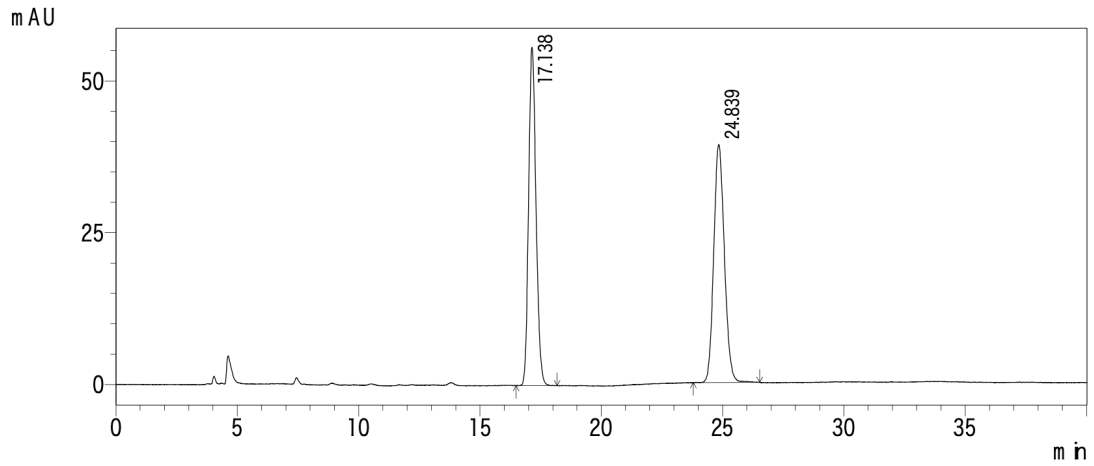

PDA Ch1 210nm

| Peak No. | RT (min) | Area    | Height | % Area  |
|----------|----------|---------|--------|---------|
| 1        | 17.138   | 1183923 | 55776  | 49.834  |
| 2        | 24.839   | 1191830 | 39180  | 50.166  |
| Total    |          | 2375753 | 94956  | 100.000 |

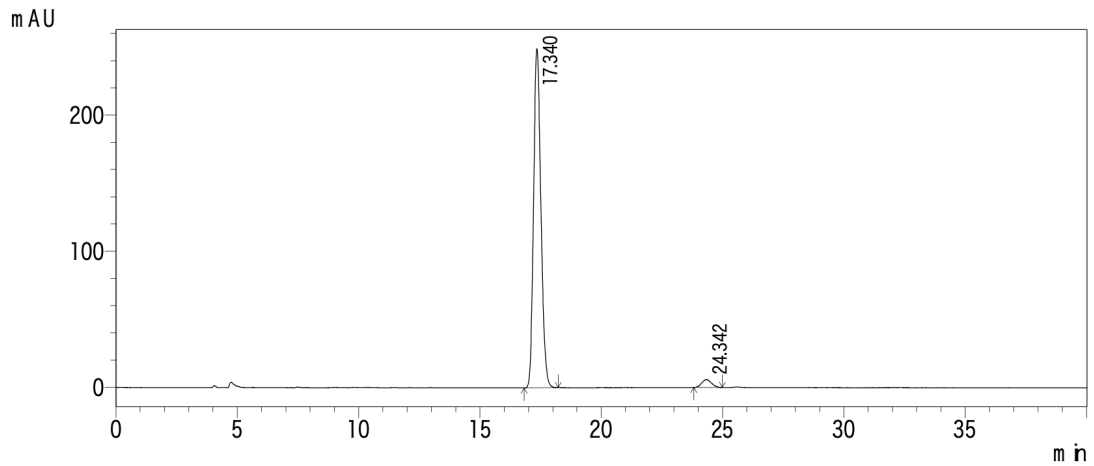

PDA Ch1 210nm

| Peak No. | RT (min) | Area    | Height | % Area  |
|----------|----------|---------|--------|---------|
| 1        | 17.340   | 5223970 | 249226 | 96.997  |
| 2        | 24.342   | 161707  | 5785   | 3.003   |
| Total    |          | 5385677 | 255011 | 100.000 |

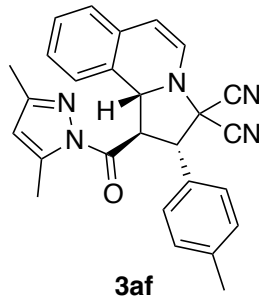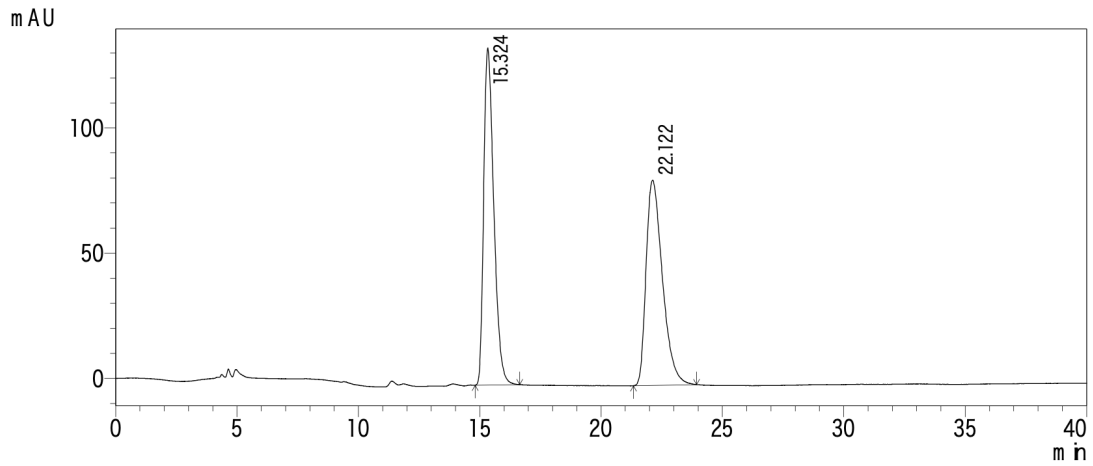

PDA Ch1 210nm

| Peak No. | RT (m in) | Area    | Height | % Area  |
|----------|-----------|---------|--------|---------|
| 1        | 15.324    | 3889834 | 134683 | 50.326  |
| 2        | 22.122    | 3839366 | 81899  | 49.674  |
| Total    |           | 7729200 | 216582 | 100.000 |

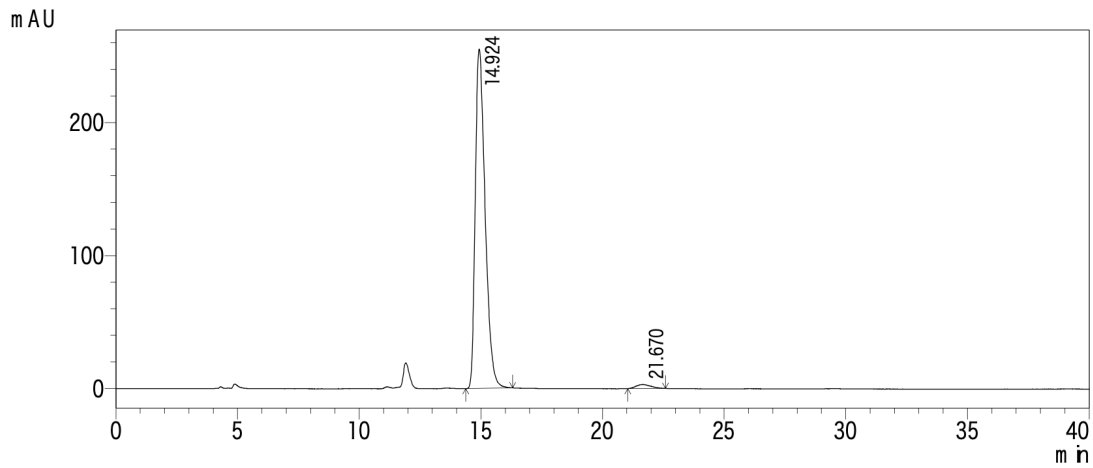

PDA Ch1 210nm

| Peak No. | RT (m in) | Area    | Height | % Area  |
|----------|-----------|---------|--------|---------|
| 1        | 14.924    | 7179393 | 255016 | 98.268  |
| 2        | 21.670    | 126565  | 2968   | 1.732   |
| Total    |           | 7305958 | 257984 | 100.000 |

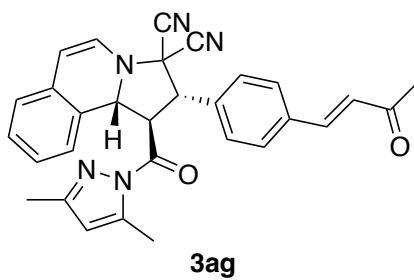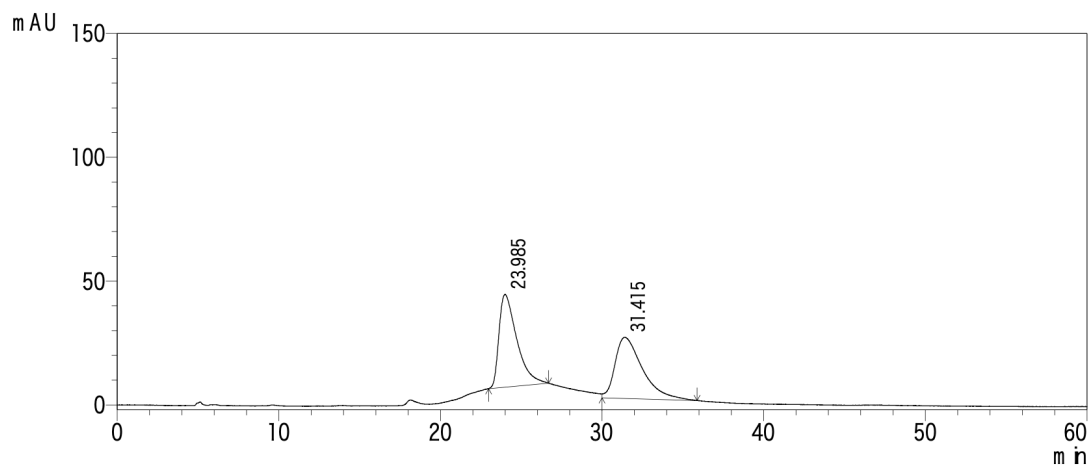

PDA Ch1 210nm

| Peak No. | RT (m in) | Area    | Height | % Area  |
|----------|-----------|---------|--------|---------|
| 1        | 23.985    | 2878328 | 37466  | 49.566  |
| 2        | 31.415    | 2928721 | 24758  | 50.434  |
| Total    |           | 5807049 | 62224  | 100.000 |

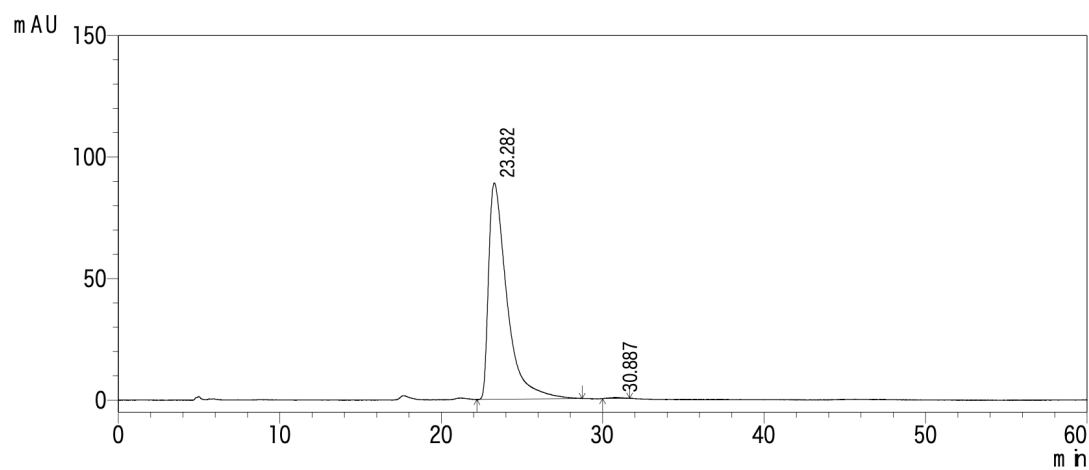

PDA Ch1 210nm

| Peak No. | RT (m in) | Area    | Height | % Area  |
|----------|-----------|---------|--------|---------|
| 1        | 23.282    | 7015802 | 89047  | 99.692  |
| 2        | 30.887    | 21665   | 396    | 0.308   |
| Total    |           | 7037467 | 89443  | 100.000 |



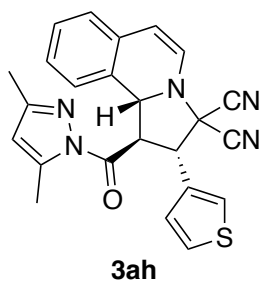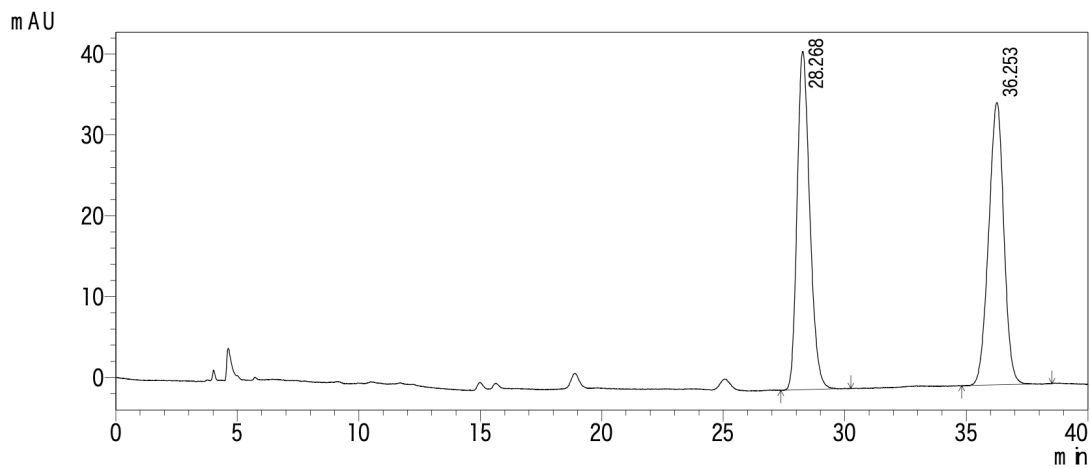

PDA Ch1 210nm

| Peak No. | RT (min) | Area    | Height | % Area  |
|----------|----------|---------|--------|---------|
| 1        | 28.268   | 1511136 | 41857  | 49.919  |
| 2        | 36.253   | 1516026 | 34921  | 50.081  |
| Total    |          | 3027162 | 76778  | 100.000 |

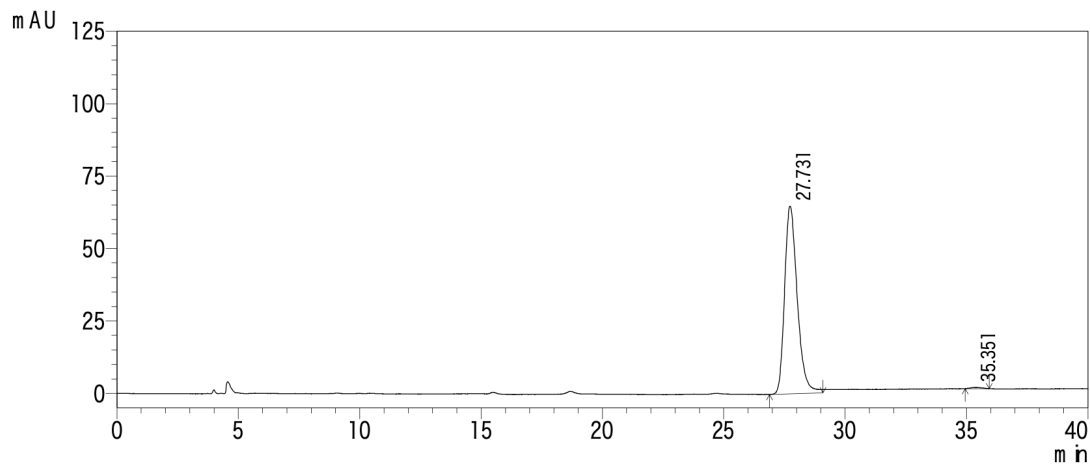

PDA Ch1 210nm

| Peak No. | RT (min) | Area    | Height | % Area  |
|----------|----------|---------|--------|---------|
| 1        | 27.731   | 2348973 | 64759  | 99.405  |
| 2        | 35.351   | 14067   | 435    | 0.595   |
| Total    |          | 2363039 | 65195  | 100.000 |

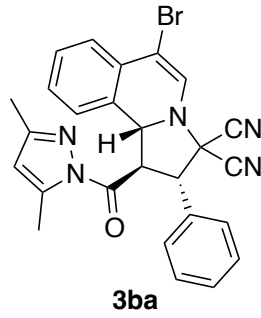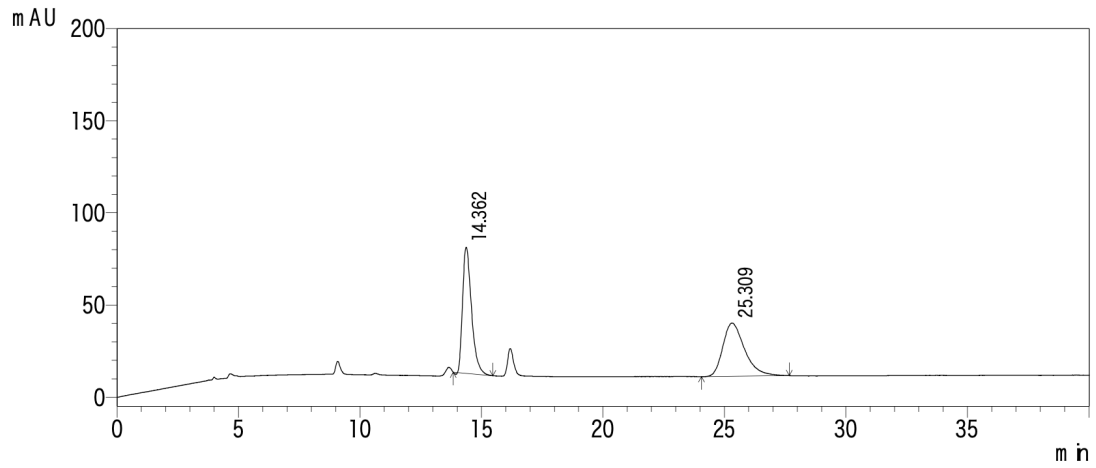

PDA Ch1 210nm

| Peak No. | RT (m in) | Area    | Height | % Area  |
|----------|-----------|---------|--------|---------|
| 1        | 14.362    | 1744605 | 68508  | 49.272  |
| 2        | 25.309    | 1796172 | 28848  | 50.728  |
| Total    |           | 3540777 | 97356  | 100.000 |

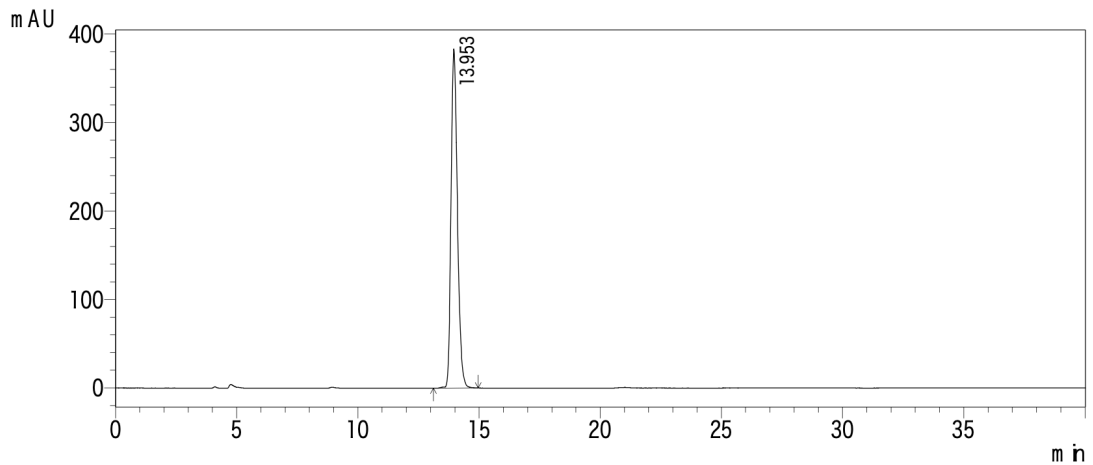

PDA Ch1 210nm

| Peak No. | RT (m in) | Area    | Height | % Area  |
|----------|-----------|---------|--------|---------|
| 1        | 13.953    | 7031637 | 383320 | 100.000 |
| Total    |           | 7031637 | 383320 | 100.000 |

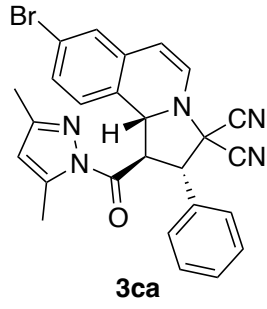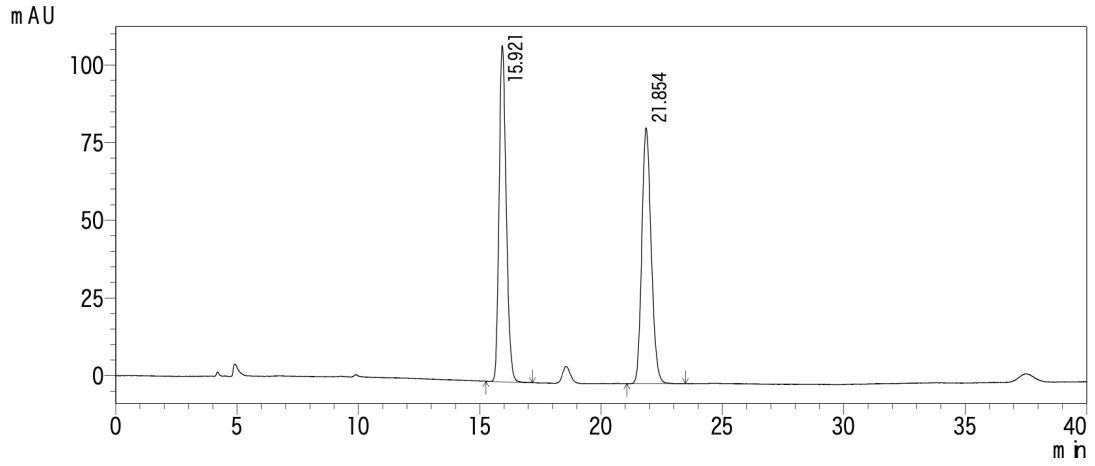

PDA Ch1 210nm

| Peak No. | RT (min) | Area    | Height | % Area  |
|----------|----------|---------|--------|---------|
| 1        | 15.921   | 2209964 | 108242 | 50.003  |
| 2        | 21.854   | 2209661 | 82282  | 49.997  |
| Total    |          | 4419624 | 190524 | 100.000 |

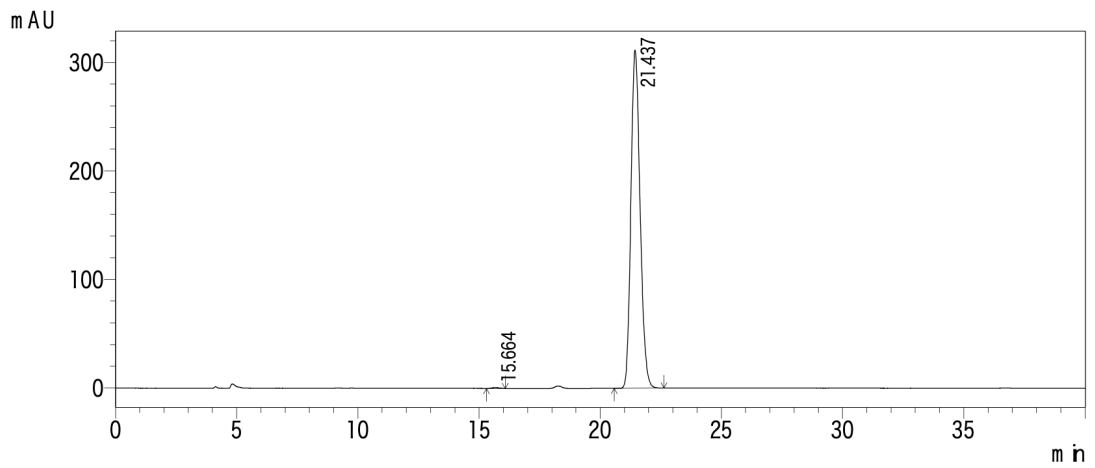

PDA Ch1 210nm

| Peak No. | RT (min) | Area    | Height | % Area  |
|----------|----------|---------|--------|---------|
| 1        | 15.664   | 18488   | 979    | 0.225   |
| 2        | 21.437   | 8194733 | 311592 | 99.775  |
| Total    |          | 8213222 | 312571 | 100.000 |

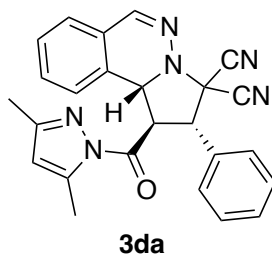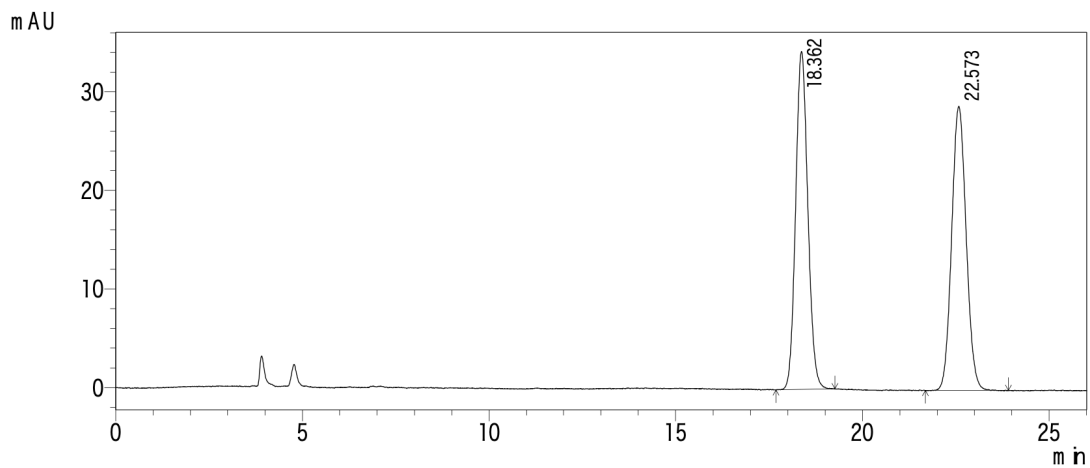

PDA Ch1 210nm

| Peak No. | RT (m in) | Area    | Height | % Area  |
|----------|-----------|---------|--------|---------|
| 1        | 18.362    | 775812  | 34290  | 49.944  |
| 2        | 22.573    | 777545  | 28821  | 50.056  |
| Total    |           | 1553357 | 63111  | 100.000 |

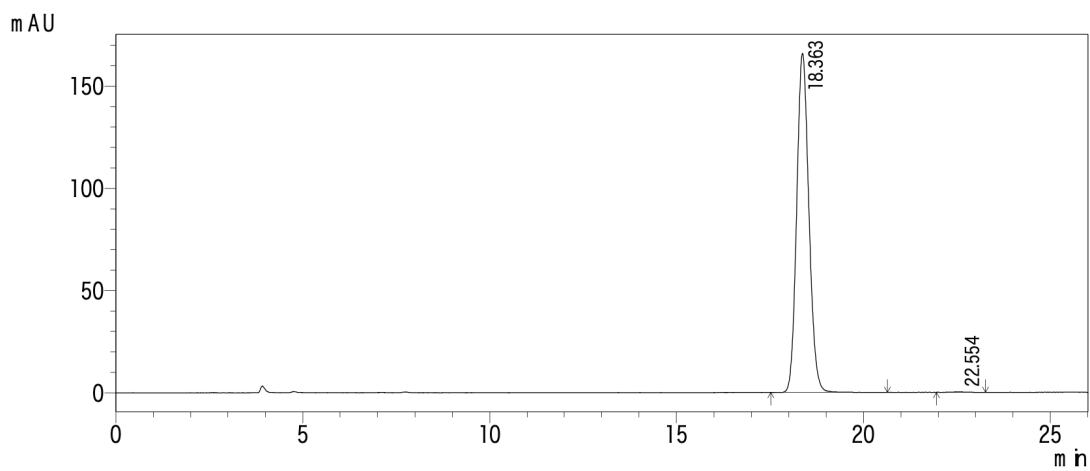

PDA Ch1 210nm

| Peak No. | RT (m in) | Area    | Height | % Area  |
|----------|-----------|---------|--------|---------|
| 1        | 18.363    | 3754401 | 165946 | 99.863  |
| 2        | 22.554    | 5136    | 241    | 0.137   |
| Total    |           | 3759537 | 166187 | 100.000 |

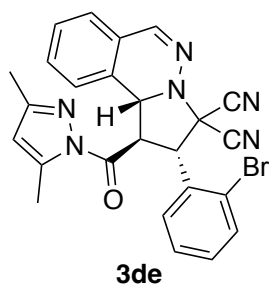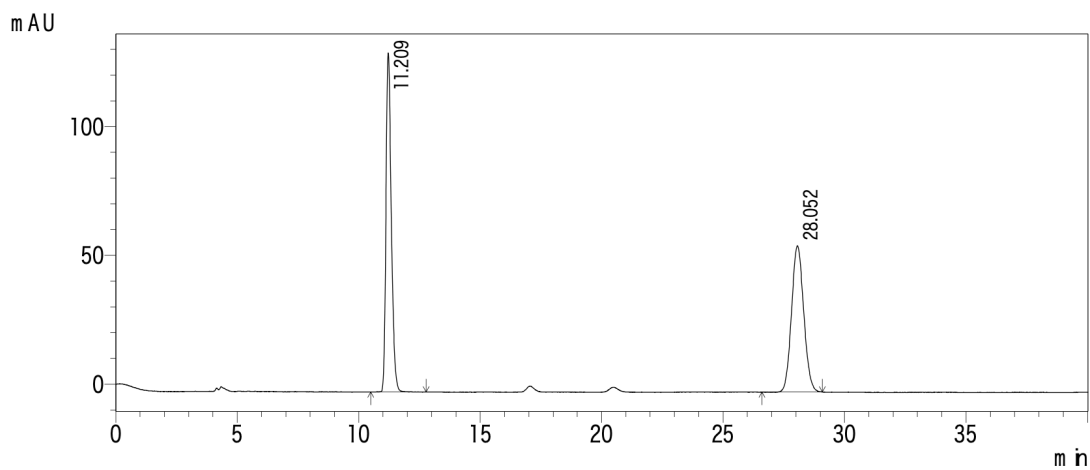

PDA Ch1 210nm

| Peak No. | RT (m in) | Area    | Height | % Area  |
|----------|-----------|---------|--------|---------|
| 1        | 11.209    | 2001089 | 131698 | 50.248  |
| 2        | 28.052    | 1981369 | 56855  | 49.752  |
| Total    |           | 3982459 | 188553 | 100.000 |

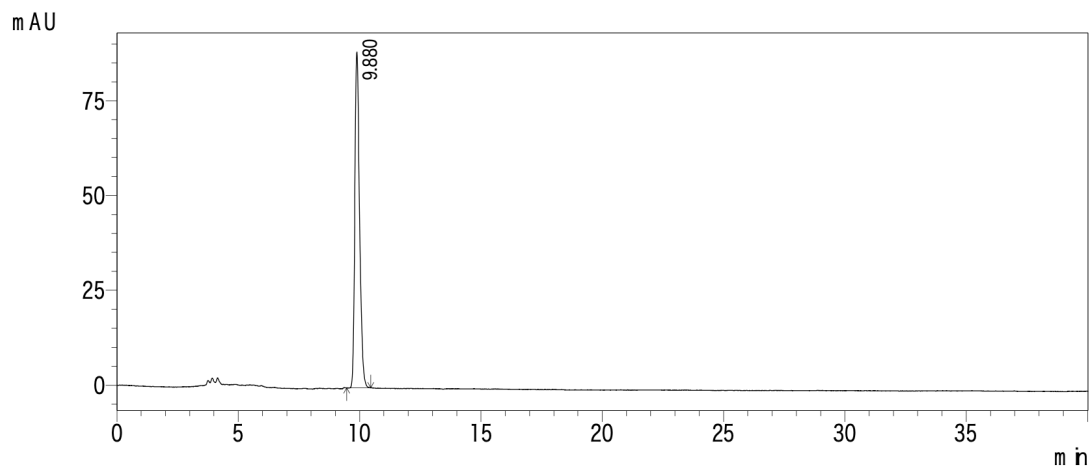

PDA Ch1 210nm

| Peak No. | RT (m in) | Area    | Height | % Area  |
|----------|-----------|---------|--------|---------|
| 1        | 9.880     | 1201435 | 88576  | 100.000 |
| Total    |           | 1201435 | 88576  | 100.000 |

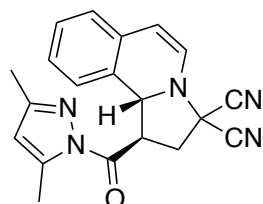

**3ai**

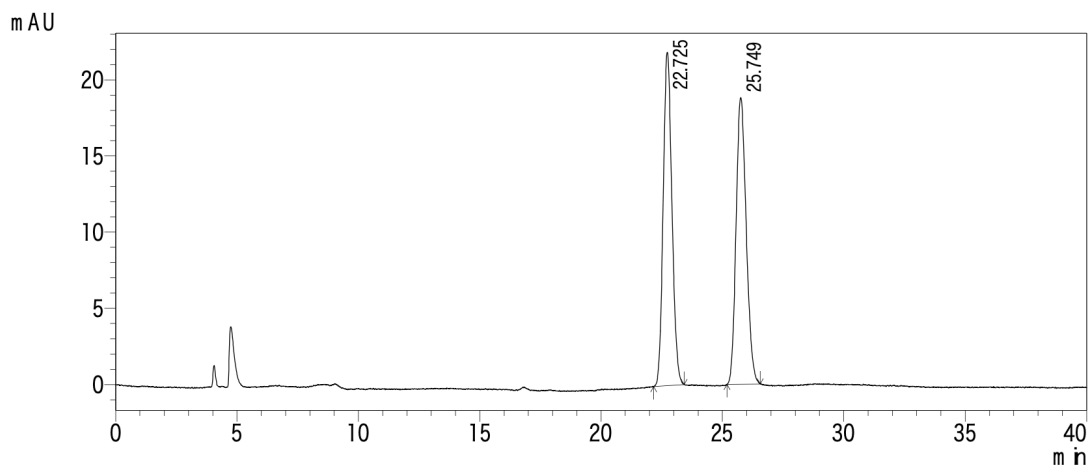

PDA Ch1 210nm

| Peak No. | RT (m in) | Area    | Height | % Area  |
|----------|-----------|---------|--------|---------|
| 1        | 22.725    | 547794  | 21906  | 50.042  |
| 2        | 25.749    | 546883  | 18823  | 49.958  |
| Total    |           | 1094677 | 40729  | 100.000 |

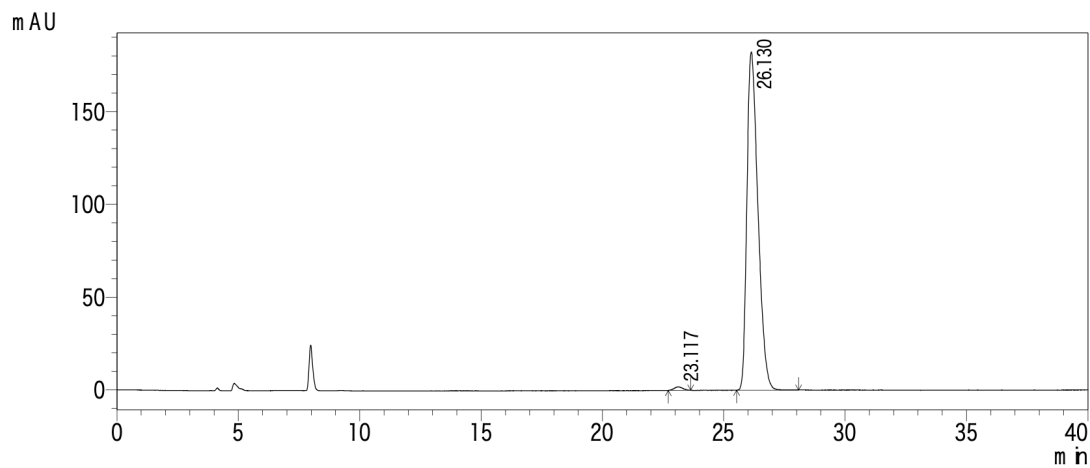

PDA Ch1 210nm

| Peak No. | RT (m in) | Area    | Height | % Area  |
|----------|-----------|---------|--------|---------|
| 1        | 23.117    | 45707   | 1869   | 0.787   |
| 2        | 26.130    | 5763235 | 182355 | 99.213  |
| Total    |           | 5808942 | 184224 | 100.000 |

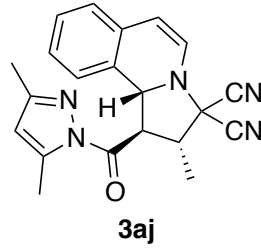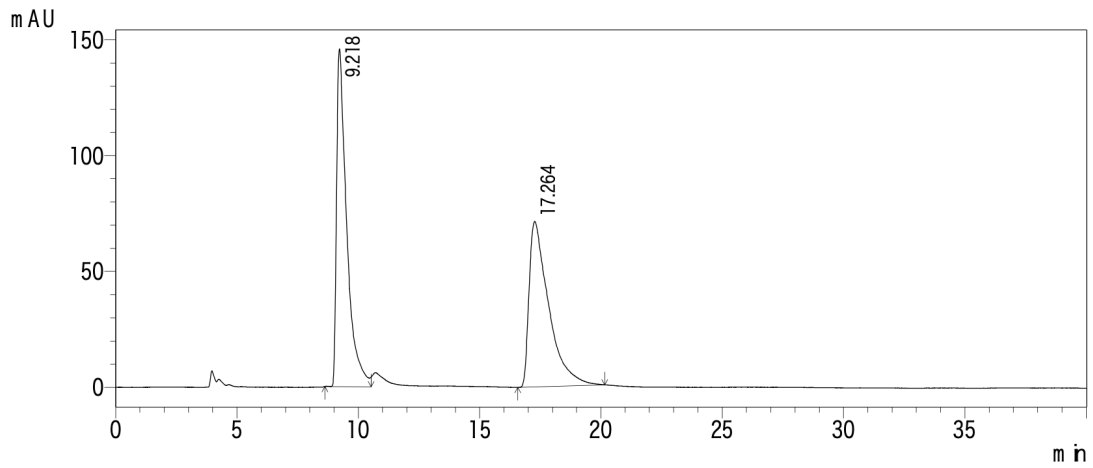

PDA Ch1 210nm

| Peak No. | RT (min) | Area    | Height | % Area  |
|----------|----------|---------|--------|---------|
| 1        | 9.218    | 4243433 | 145762 | 51.399  |
| 2        | 17.264   | 4012410 | 71400  | 48.601  |
| Total    |          | 8255842 | 217162 | 100.000 |

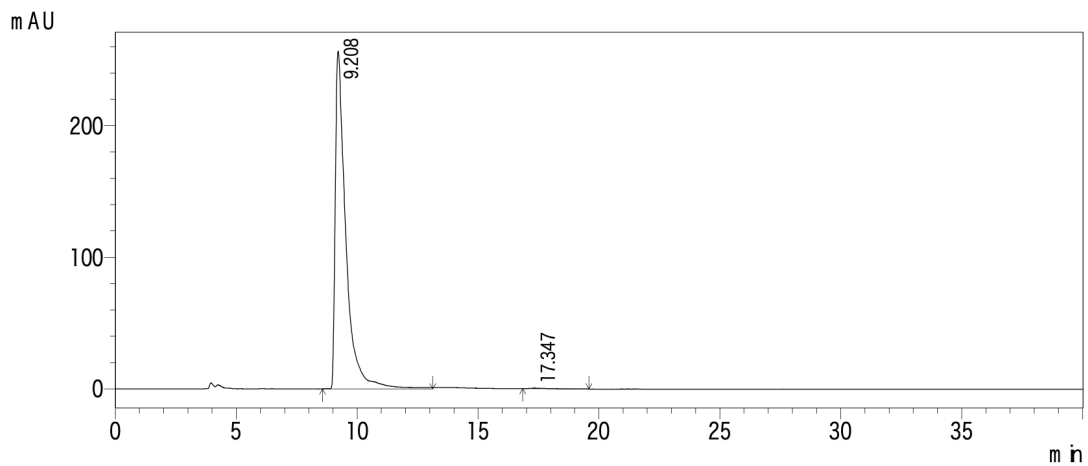

PDA Ch1 210nm

| Peak No. | RT (min) | Area    | Height | % Area  |
|----------|----------|---------|--------|---------|
| 1        | 9.208    | 7851822 | 256708 | 99.733  |
| 2        | 17.347   | 21003   | 442    | 0.267   |
| Total    |          | 7872825 | 257151 | 100.000 |

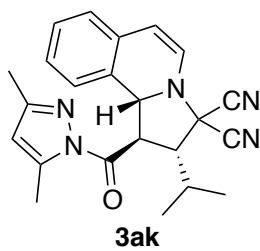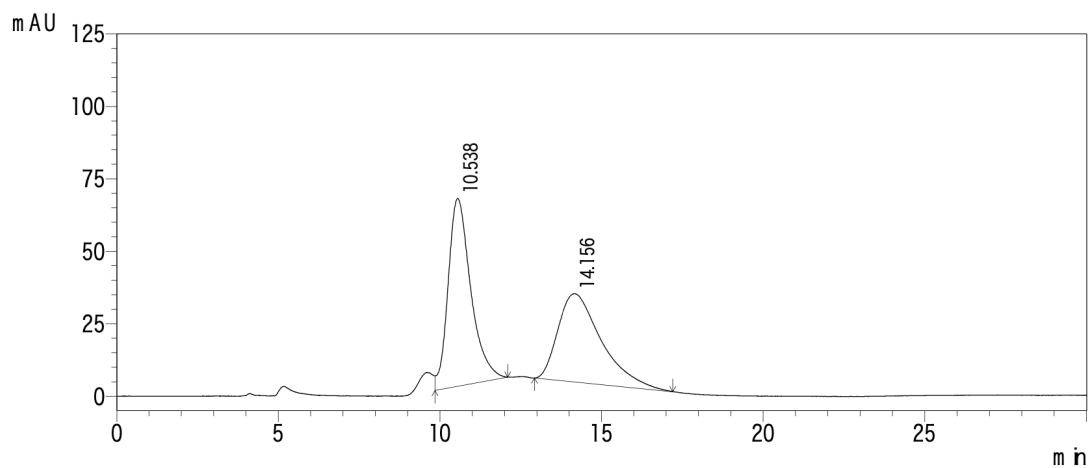

PDA Ch1 210nm

| Peak No. | RT (m in) | Area    | Height | % Area  |
|----------|-----------|---------|--------|---------|
| 1        | 10.538    | 3168080 | 64804  | 52.658  |
| 2        | 14.156    | 2848227 | 30473  | 47.342  |
| Total    |           | 6016307 | 95277  | 100.000 |

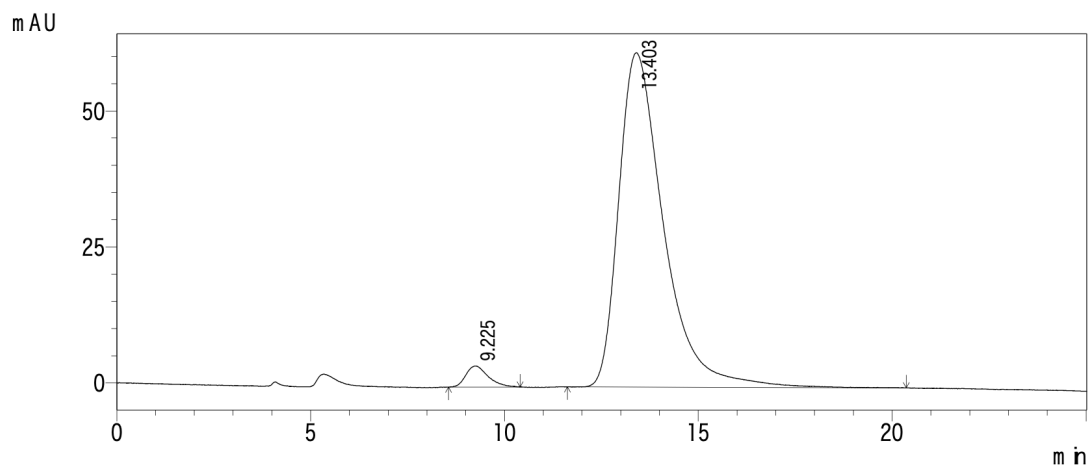

PDA Ch1 210nm

| Peak No. | RT (m in) | Area    | Height | % Area  |
|----------|-----------|---------|--------|---------|
| 1        | 9.225     | 154707  | 3873   | 3.036   |
| 2        | 13.403    | 4940719 | 61447  | 96.964  |
| Total    |           | 5095427 | 65320  | 100.000 |



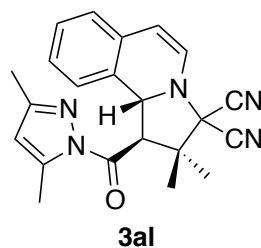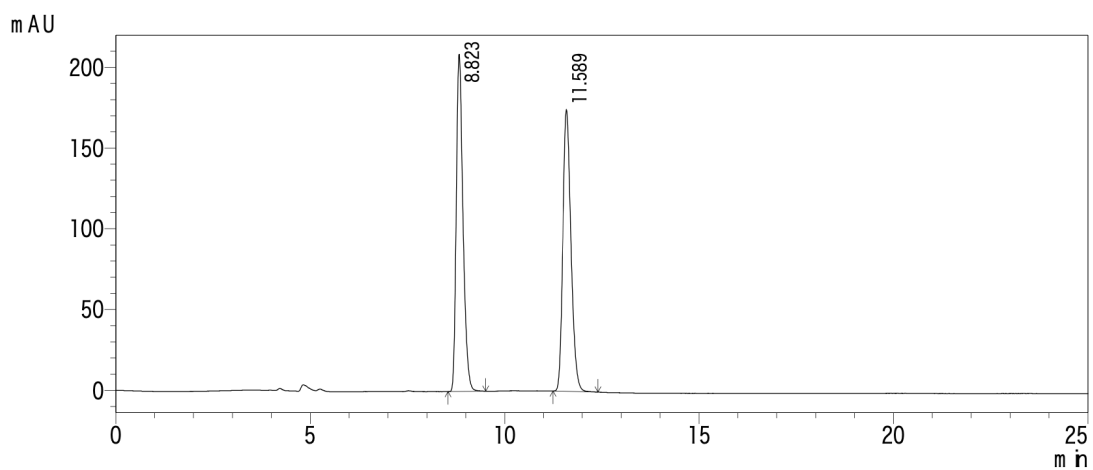

PDA Ch1 210nm

| Peak No. | RT (min) | Area    | Height | % Area  |
|----------|----------|---------|--------|---------|
| 1        | 8.823    | 2537856 | 208799 | 49.779  |
| 2        | 11.589   | 2560369 | 174534 | 50.221  |
| Total    |          | 5098225 | 383332 | 100.000 |

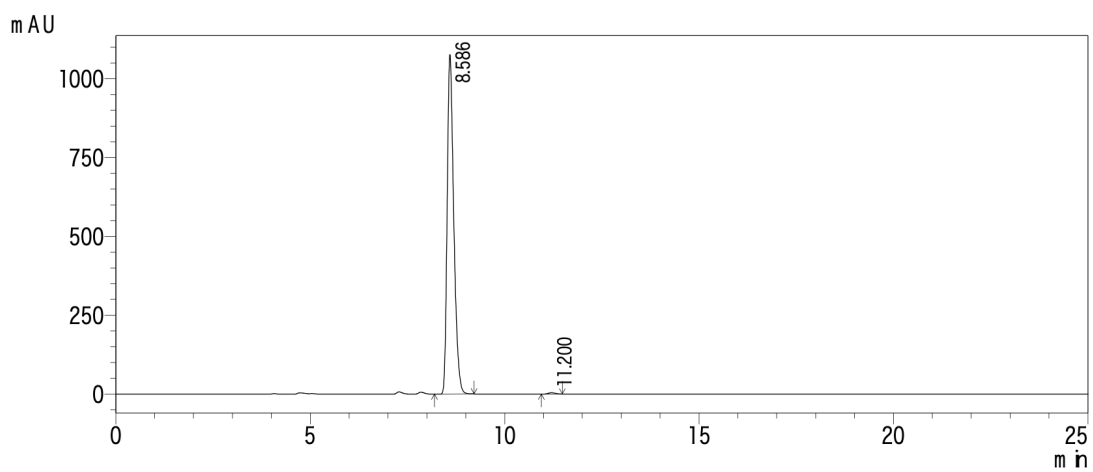

PDA Ch1 210nm

| Peak No. | RT (min) | Area     | Height  | % Area  |
|----------|----------|----------|---------|---------|
| 1        | 8.586    | 12660942 | 1076877 | 99.573  |
| 2        | 11.200   | 54314    | 4046    | 0.427   |
| Total    |          | 12715255 | 1080922 | 100.000 |

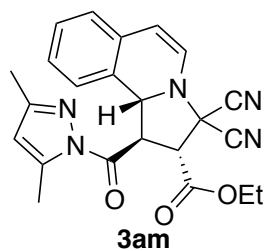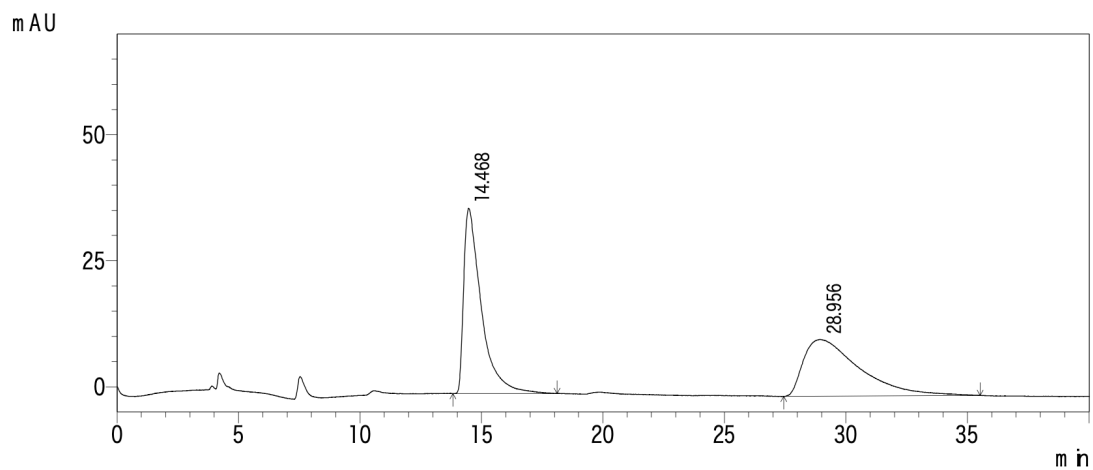

PDA Ch1 210nm

| Peak No. | RT (m in) | Area    | Height | % Area  |
|----------|-----------|---------|--------|---------|
| 1        | 14.468    | 1858350 | 36798  | 50.815  |
| 2        | 28.956    | 1798738 | 11249  | 49.185  |
| Total    |           | 3657088 | 48047  | 100.000 |

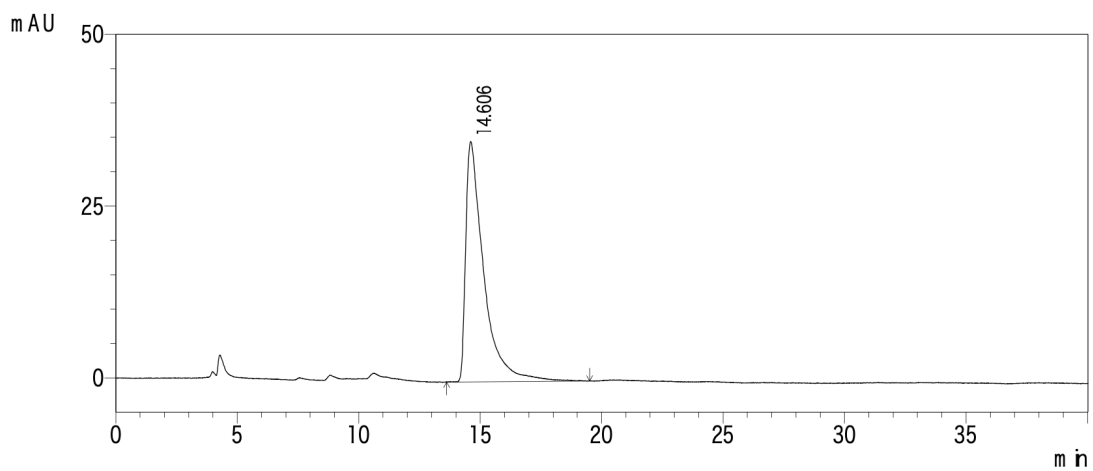

PDA Ch1 210nm

| Peak No. | RT (m in) | Area    | Height | % Area  |
|----------|-----------|---------|--------|---------|
| 1        | 14.606    | 1798382 | 34992  | 100.000 |
| Total    |           | 1798382 | 34992  | 100.000 |

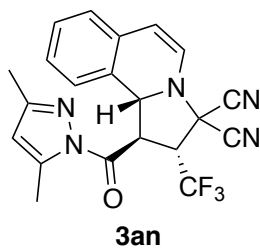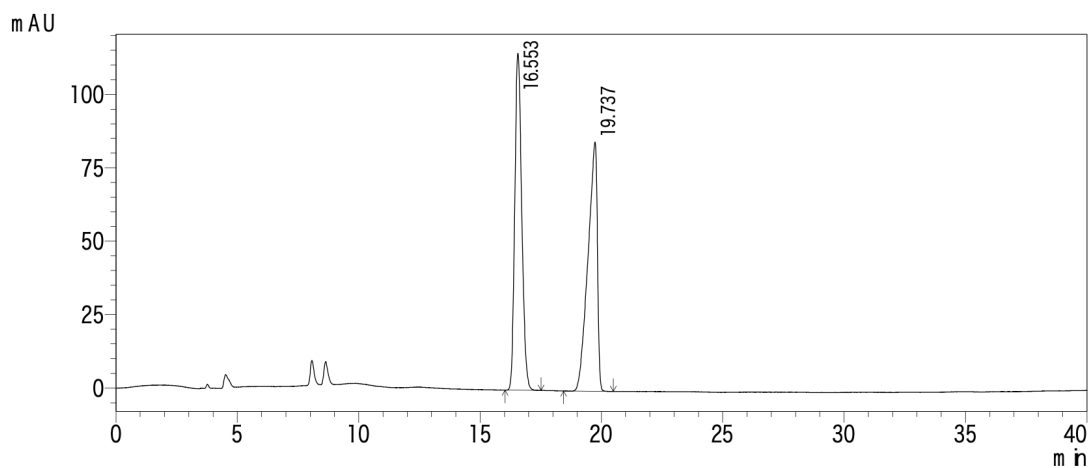

PDA Ch1 210nm

| Peak No. | RT (m in) | Area    | Height | % Area  |
|----------|-----------|---------|--------|---------|
| 1        | 16.553    | 2284412 | 114746 | 50.043  |
| 2        | 19.737    | 2280523 | 84797  | 49.957  |
| Total    |           | 4564935 | 199543 | 100.000 |

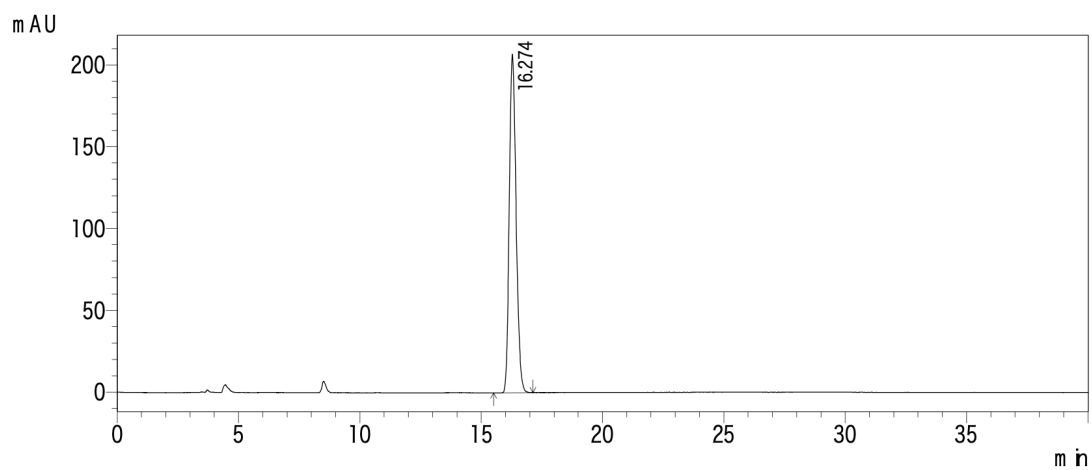

PDA Ch1 210nm

| Peak No. | RT (m in) | Area    | Height | % Area  |
|----------|-----------|---------|--------|---------|
| 1        | 16.274    | 4033147 | 206943 | 100.000 |
| Total    |           | 4033147 | 206943 | 100.000 |

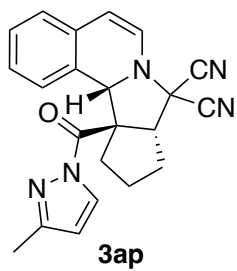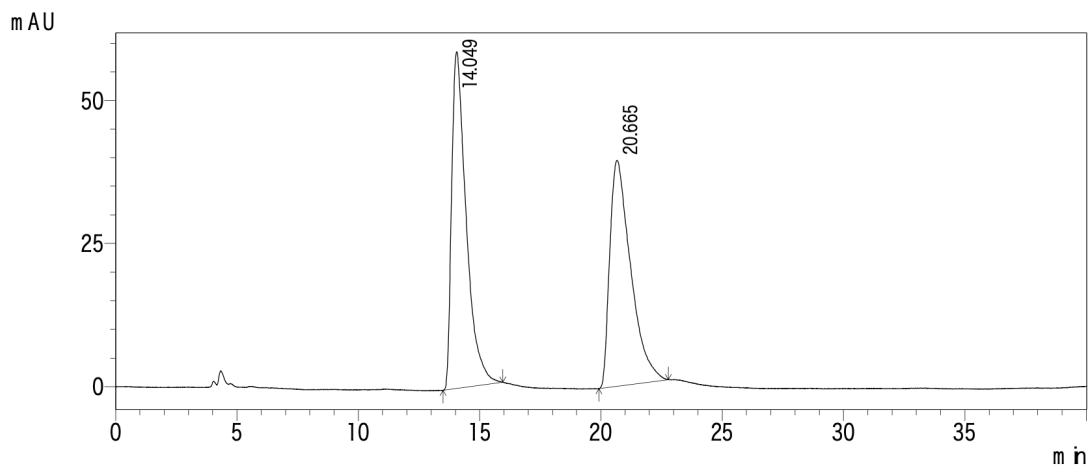

PDA Ch1 210nm

| Peak No. | RT (m in) | Area    | Height | % Area  |
|----------|-----------|---------|--------|---------|
| 1        | 14.049    | 2455788 | 58802  | 50.966  |
| 2        | 20.665    | 2362730 | 39421  | 49.034  |
| Total    |           | 4818518 | 98223  | 100.000 |

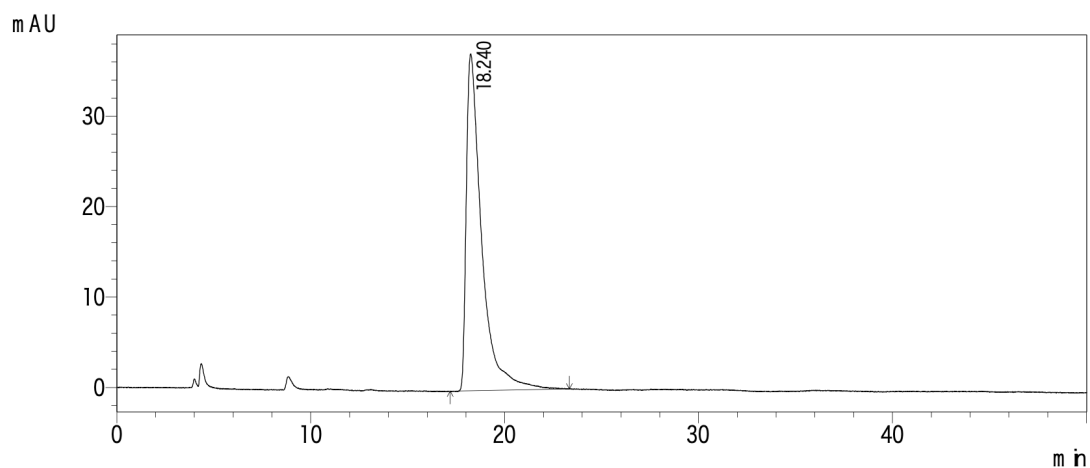

PDA Ch1 210nm

| Peak No. | RT (m in) | Area    | Height | % Area  |
|----------|-----------|---------|--------|---------|
| 1        | 18.240    | 2048963 | 37279  | 100.000 |
| Total    |           | 2048963 | 37279  | 100.000 |

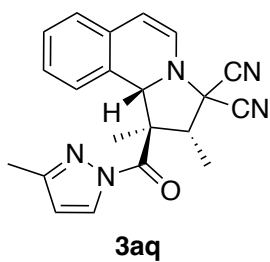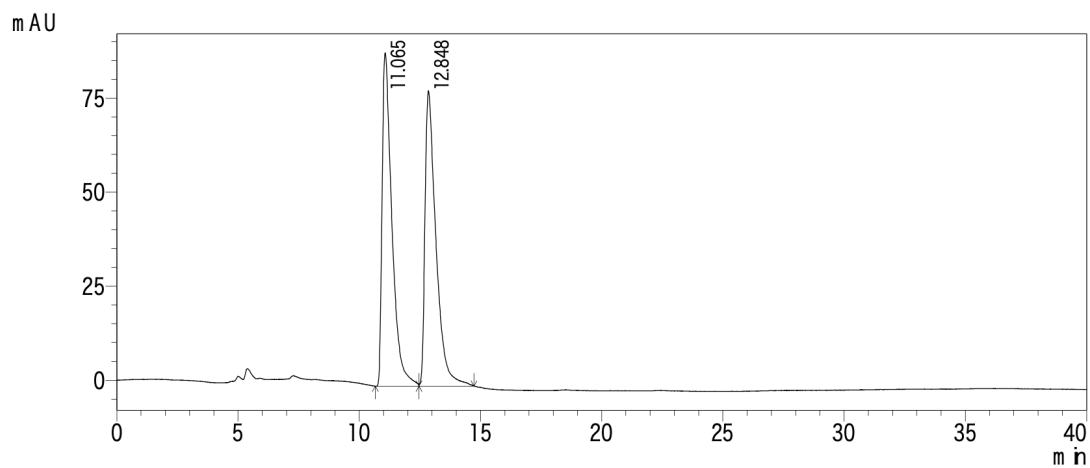

PDA Ch1 210nm

| Peak No. | RT (m in) | Area    | Height | % Area  |
|----------|-----------|---------|--------|---------|
| 1        | 11.065    | 2488449 | 88633  | 50.179  |
| 2        | 12.848    | 2470651 | 78538  | 49.821  |
| Total    |           | 4959101 | 167171 | 100.000 |

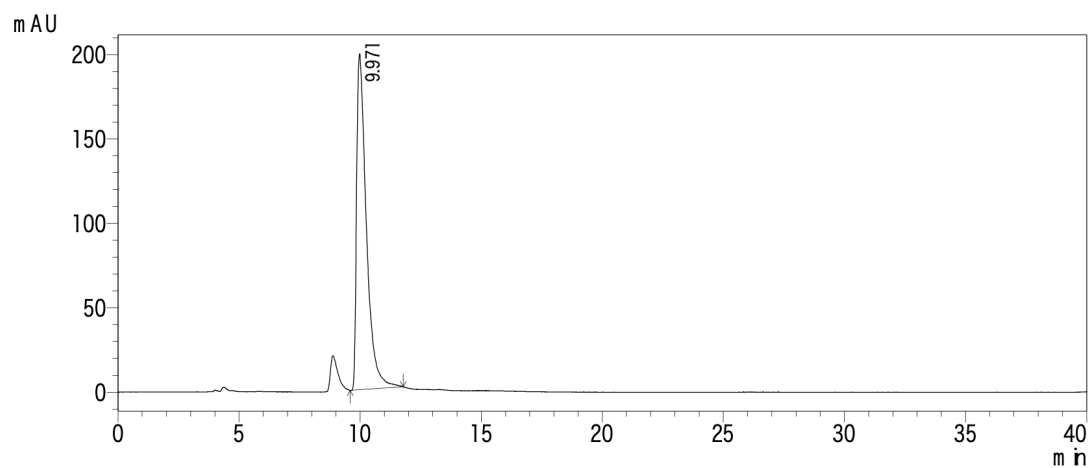

PDA Ch1 210nm

| Peak No. | RT (m in) | Area    | Height | % Area  |
|----------|-----------|---------|--------|---------|
| 1        | 9.971     | 5565173 | 199066 | 100.000 |
| Total    |           | 5565173 | 199066 | 100.000 |

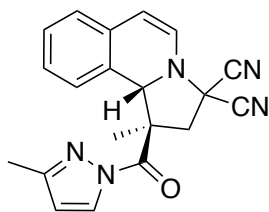

**3ar**

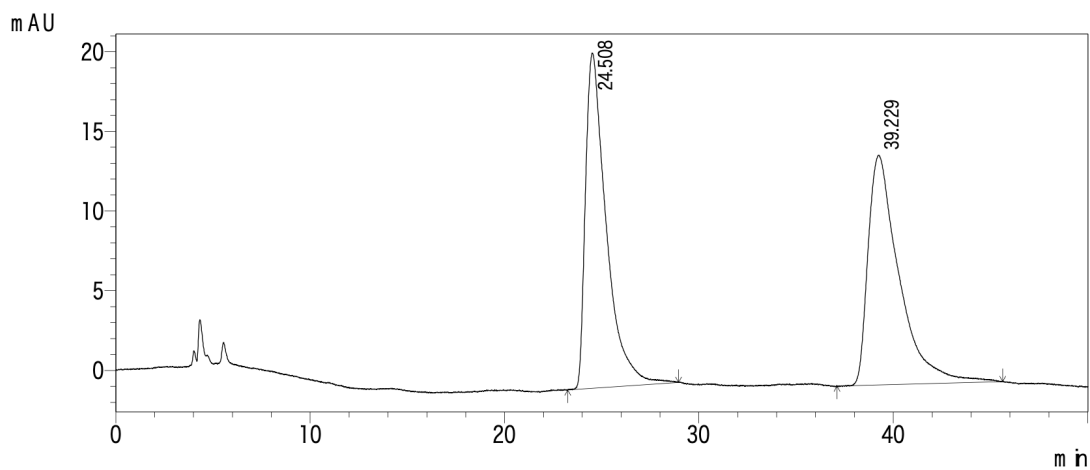

PDA Ch1 210nm

| Peak No. | RT (m in) | Area    | Height | % Area  |
|----------|-----------|---------|--------|---------|
| 1        | 24.508    | 1564182 | 21040  | 49.445  |
| 2        | 39.229    | 1599317 | 14413  | 50.555  |
| Total    |           | 3163498 | 35453  | 100.000 |

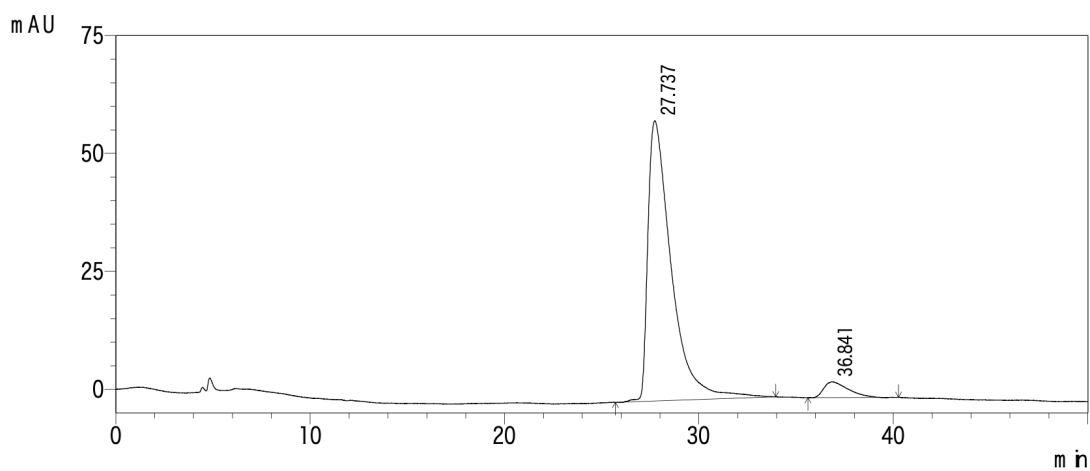

PDA Ch1 210nm

| Peak No. | RT (m in) | Area    | Height | % Area  |
|----------|-----------|---------|--------|---------|
| 1        | 27.737    | 4967348 | 59416  | 94.510  |
| 2        | 36.841    | 288525  | 3362   | 5.490   |
| Total    |           | 5255874 | 62778  | 100.000 |

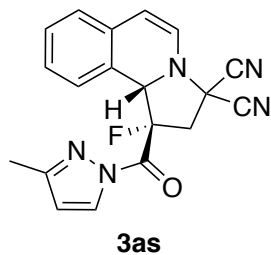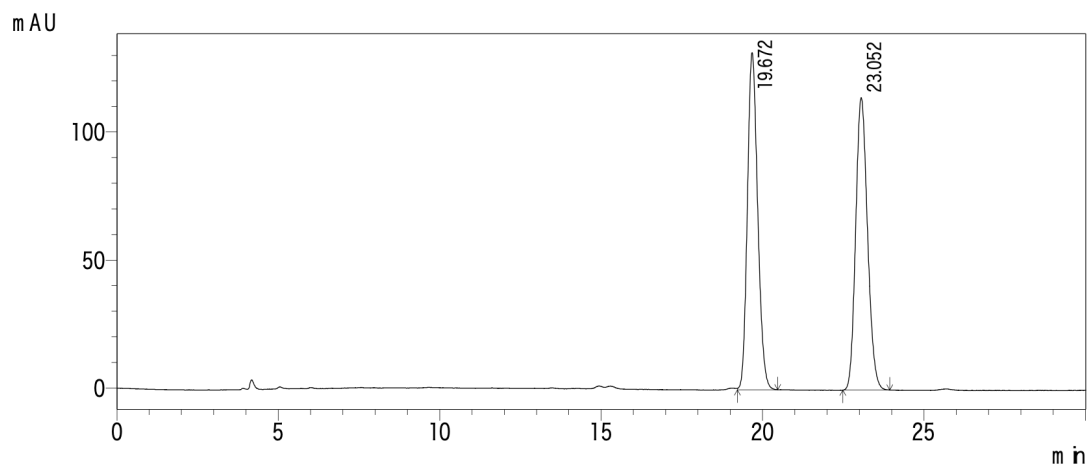

PDA Ch1 210nm

| Peak No. | RT (min) | Area    | Height | % Area  |
|----------|----------|---------|--------|---------|
| 1        | 19.672   | 2911435 | 131705 | 50.028  |
| 2        | 23.052   | 2908126 | 114275 | 49.972  |
| Total    |          | 5819562 | 245980 | 100.000 |

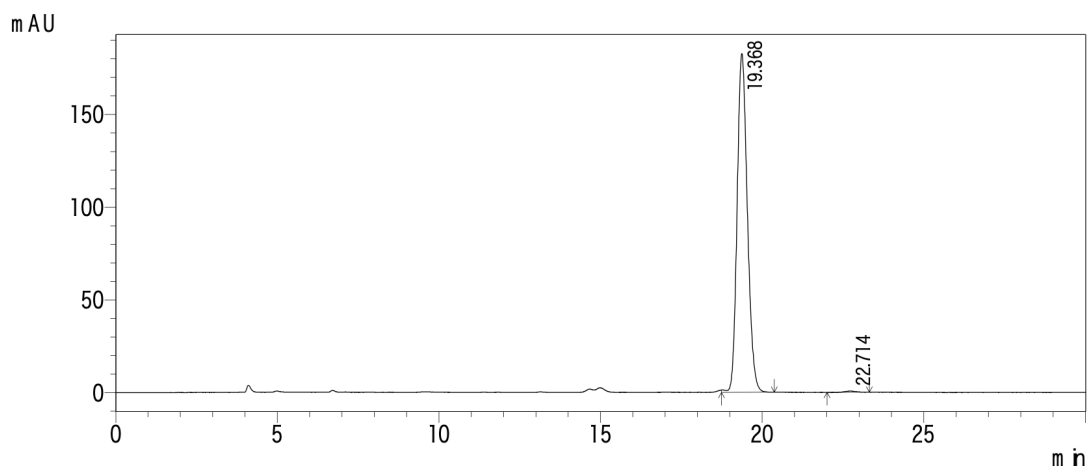

PDA Ch1 210nm

| Peak No. | RT (min) | Area    | Height | % Area  |
|----------|----------|---------|--------|---------|
| 1        | 19.368   | 4035036 | 182753 | 99.645  |
| 2        | 22.714   | 14391   | 636    | 0.355   |
| Total    |          | 4049428 | 183389 | 100.000 |

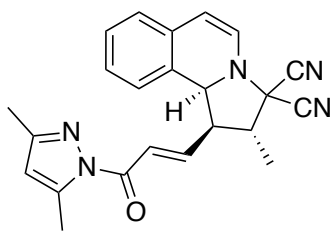

**6aa**

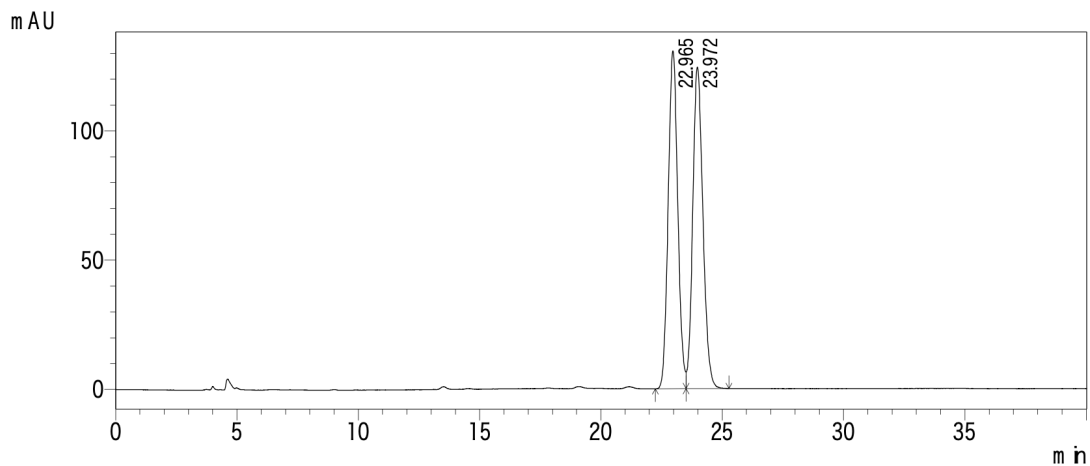

PDA Ch1 210nm

| Peak No. | RT (m in) | Area    | Height | % Area  |
|----------|-----------|---------|--------|---------|
| 1        | 22.965    | 3585502 | 130720 | 49.719  |
| 2        | 23.972    | 3625988 | 124417 | 50.281  |
| Total    |           | 7211490 | 255137 | 100.000 |

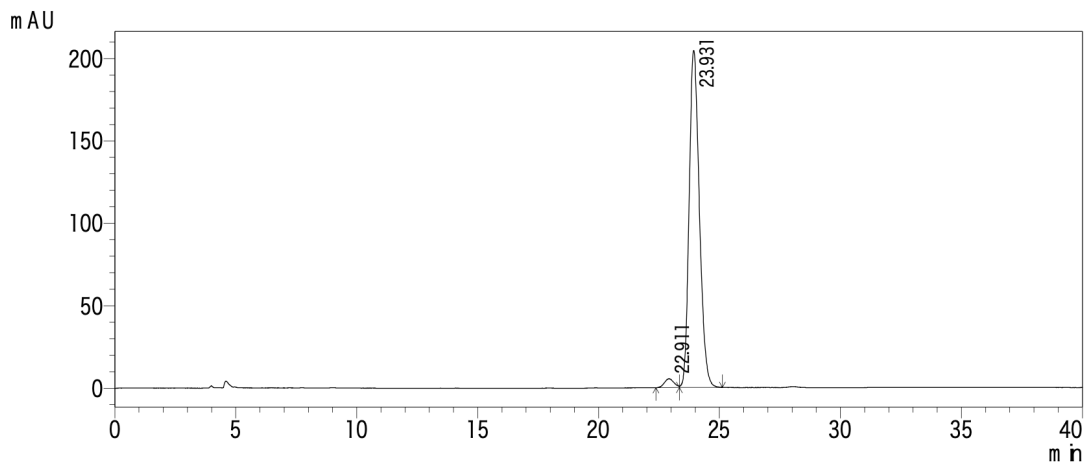

PDA Ch1 210nm

| Peak No. | RT (m in) | Area    | Height | % Area  |
|----------|-----------|---------|--------|---------|
| 1        | 22.911    | 148195  | 5395   | 2.410   |
| 2        | 23.931    | 6002214 | 204641 | 97.590  |
| Total    |           | 6150409 | 210036 | 100.000 |



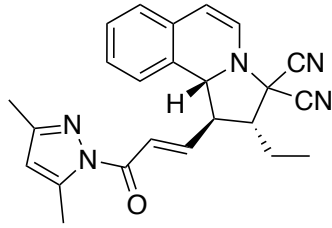

**6ab**

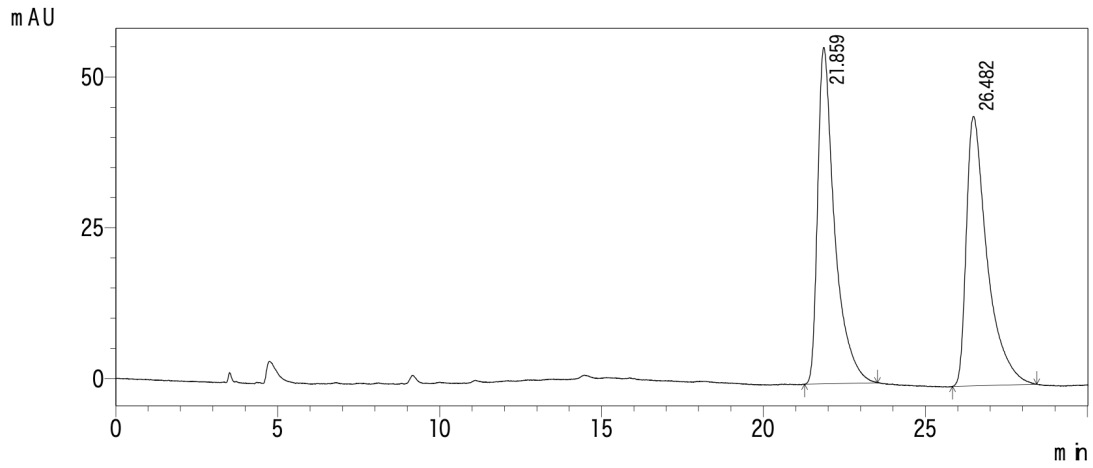

PDA Ch1 210nm

| Peak No. | RT (m in) | Area    | Height | % Area  |
|----------|-----------|---------|--------|---------|
| 1        | 21.859    | 2031008 | 55811  | 50.400  |
| 2        | 26.482    | 1998807 | 44711  | 49.600  |
| Total    |           | 4029815 | 100522 | 100.000 |

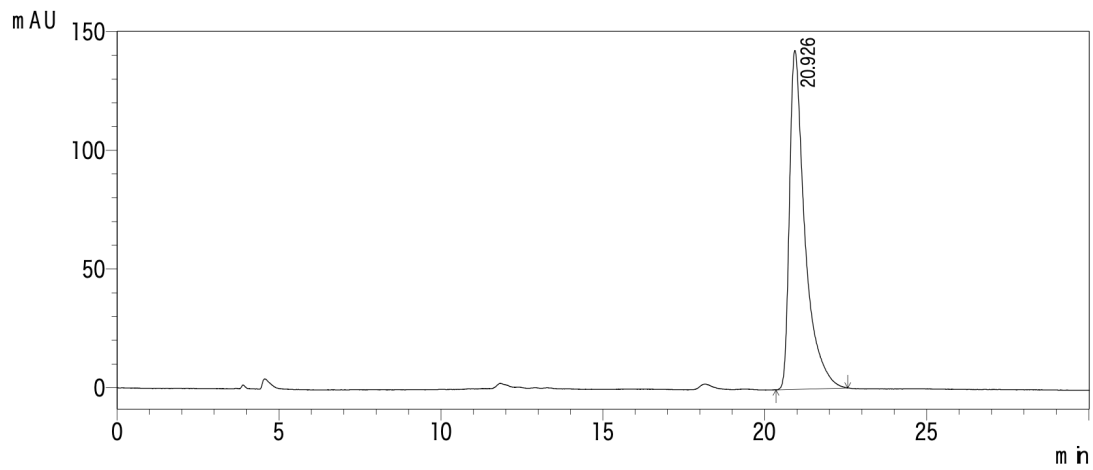

PDA Ch1 210nm

| Peak No. | RT (m in) | Area    | Height | % Area  |
|----------|-----------|---------|--------|---------|
| 1        | 20.926    | 4727437 | 142783 | 100.000 |
| Total    |           | 4727437 | 142783 | 100.000 |

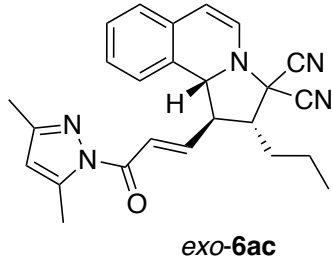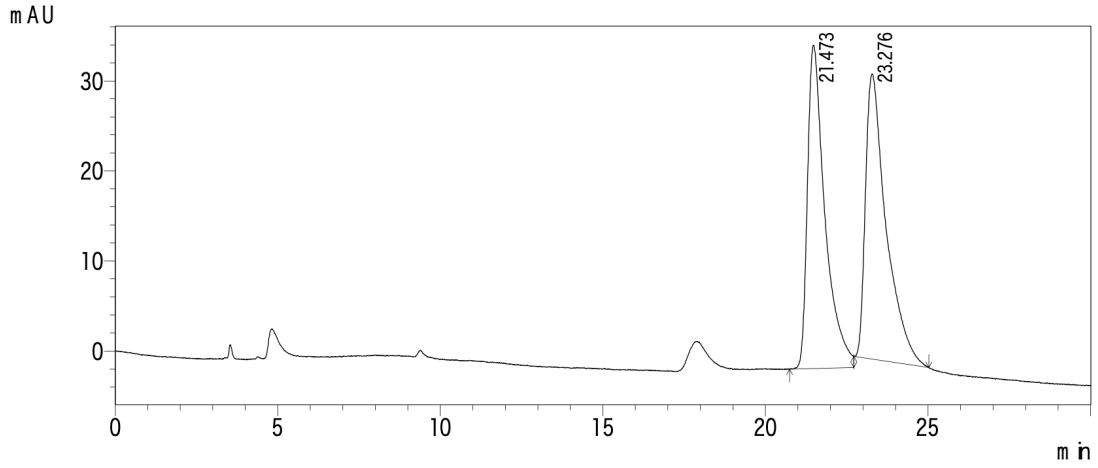

PDA Ch1 210nm

| Peak No. | RT (min) | Area    | Height | % Area  |
|----------|----------|---------|--------|---------|
| 1        | 21.473   | 1346291 | 35921  | 49.106  |
| 2        | 23.276   | 1395338 | 31674  | 50.894  |
| Total    |          | 2741629 | 67595  | 100.000 |

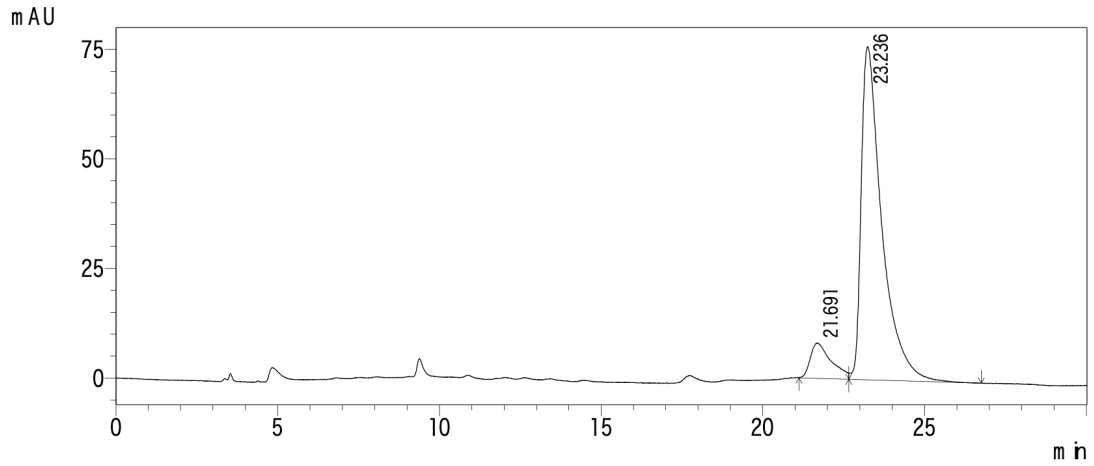

PDA Ch1 210nm

| Peak No. | RT (min) | Area    | Height | % Area  |
|----------|----------|---------|--------|---------|
| 1        | 21.691   | 359162  | 8023   | 9.640   |
| 2        | 23.236   | 3366619 | 76010  | 90.360  |
| Total    |          | 3725782 | 84032  | 100.000 |

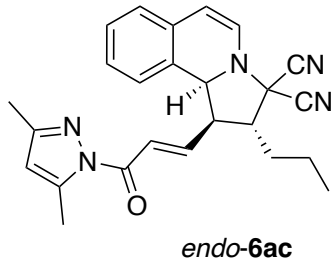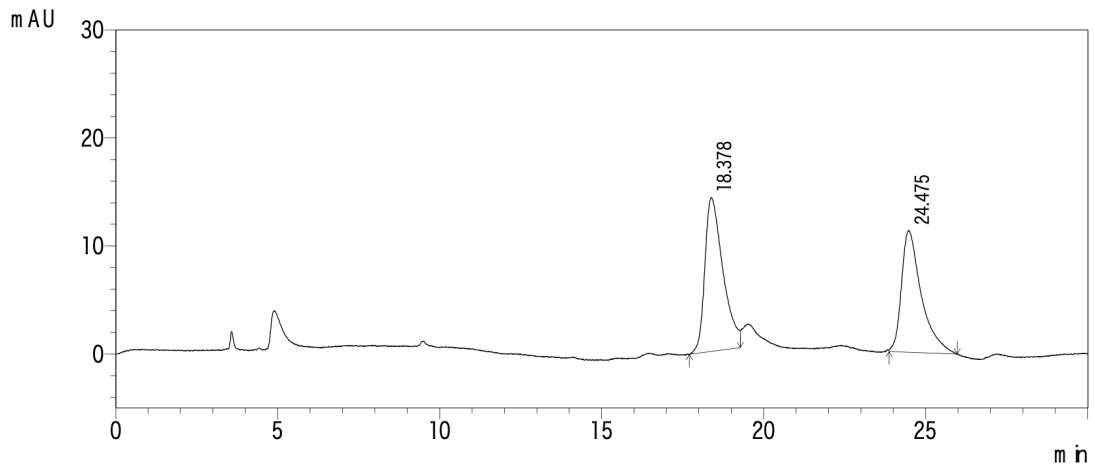

PDA Ch1 210nm

| Peak No. | RT (m in) | Area    | Height | % Area  |
|----------|-----------|---------|--------|---------|
| 1        | 18.378    | 555750  | 14263  | 53.616  |
| 2        | 24.475    | 480785  | 11290  | 46.384  |
| Total    |           | 1036535 | 25553  | 100.000 |

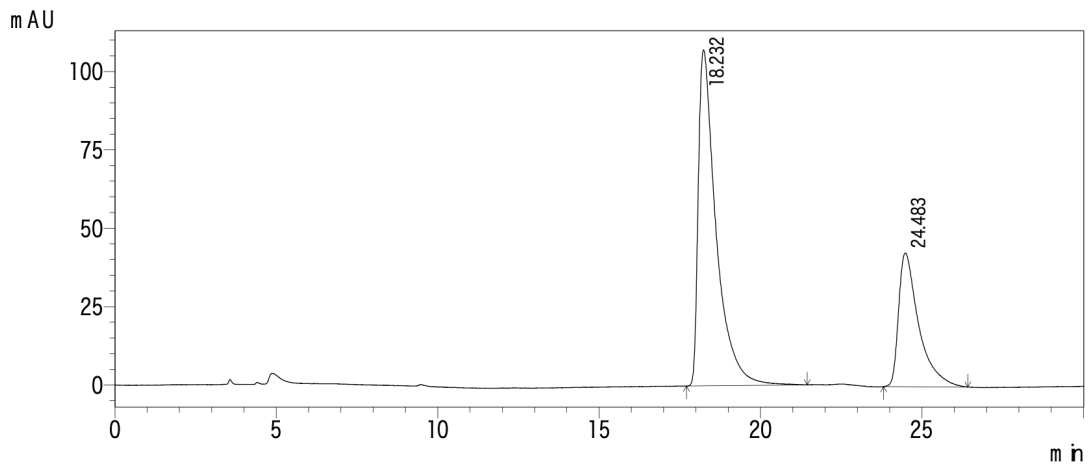

PDA Ch1 210nm

| Peak No. | RT (m in) | Area    | Height | % Area  |
|----------|-----------|---------|--------|---------|
| 1        | 18.232    | 4112041 | 107257 | 69.036  |
| 2        | 24.483    | 1844335 | 42636  | 30.964  |
| Total    |           | 5956377 | 149894 | 100.000 |

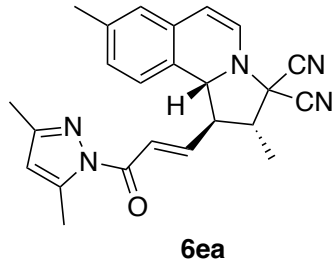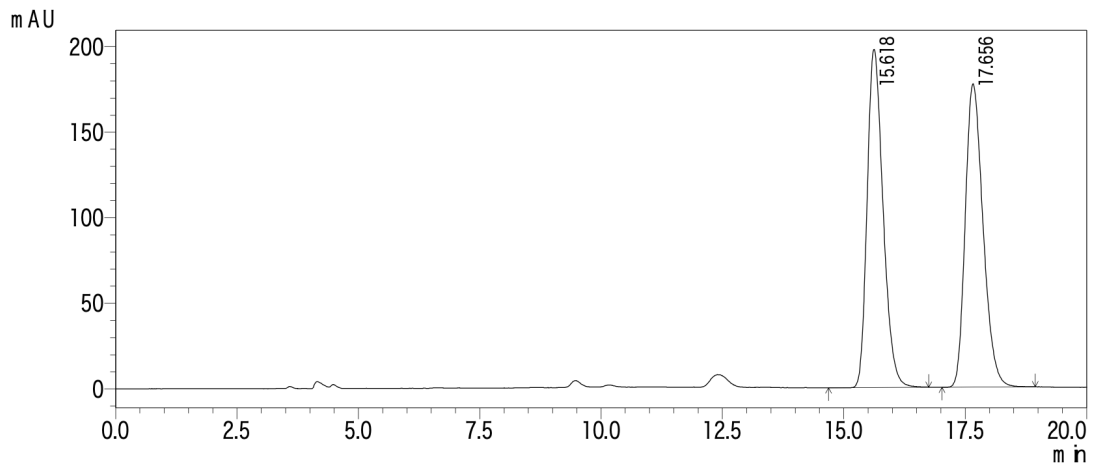

PDA Ch1 210nm

| Peak No. | RT (m in) | Area    | Height | % Area  |
|----------|-----------|---------|--------|---------|
| 1        | 15.618    | 4497732 | 197626 | 49.918  |
| 2        | 17.656    | 4512490 | 177280 | 50.082  |
| Total    |           | 9010222 | 374906 | 100.000 |

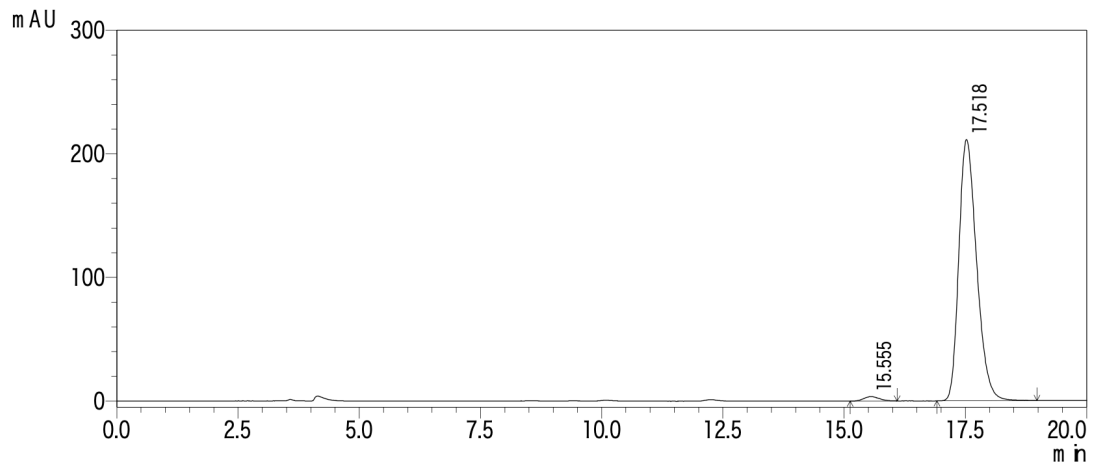

PDA Ch1 210nm

| Peak No. | RT (m in) | Area    | Height | % Area  |
|----------|-----------|---------|--------|---------|
| 1        | 15.555    | 79754   | 3613   | 1.461   |
| 2        | 17.518    | 5379382 | 211240 | 98.539  |
| Total    |           | 5459136 | 214853 | 100.000 |

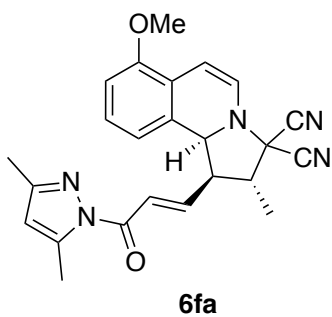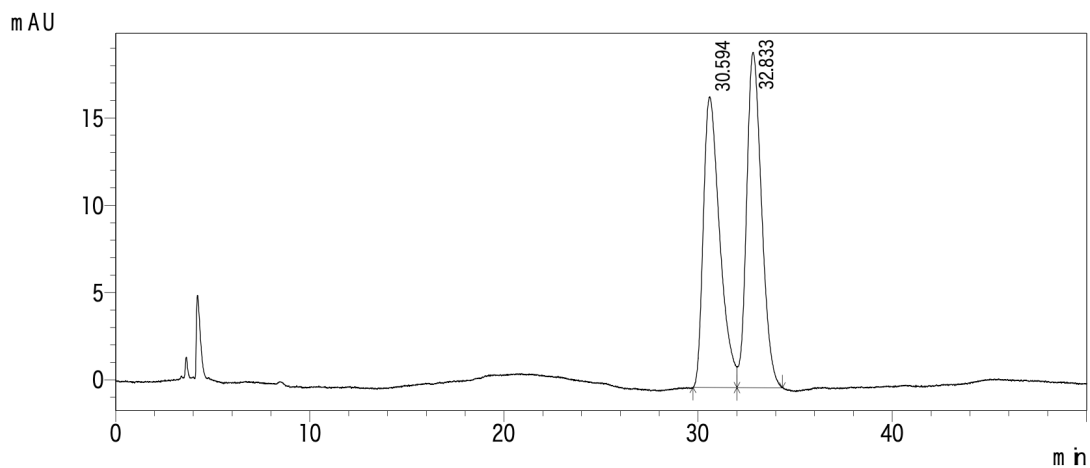

PDA Ch1 210nm

| Peak No. | RT (m in) | Area    | Height | % Area  |
|----------|-----------|---------|--------|---------|
| 1        | 30.594    | 977706  | 16645  | 48.653  |
| 2        | 32.833    | 1031861 | 19205  | 51.347  |
| Total    |           | 2009567 | 35849  | 100.000 |

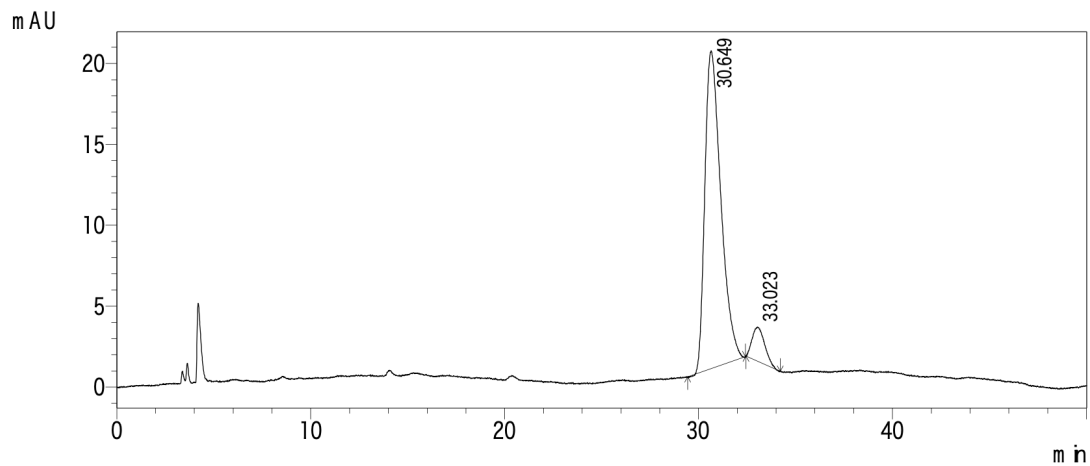

PDA Ch1 210nm

| Peak No. | RT (m in) | Area    | Height | % Area  |
|----------|-----------|---------|--------|---------|
| 1        | 30.649    | 1123566 | 19640  | 92.192  |
| 2        | 33.023    | 95159   | 2090   | 7.808   |
| Total    |           | 1218725 | 21729  | 100.000 |

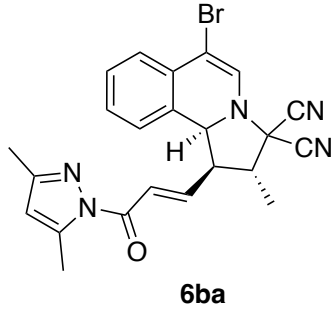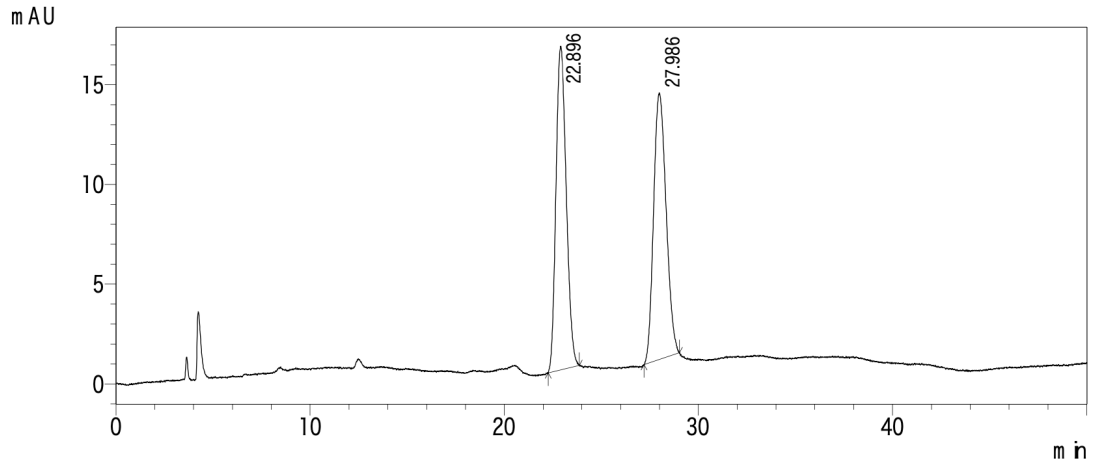

PDA Ch1 210nm

| Peak No. | RT (m in) | Area    | Height | % Area  |
|----------|-----------|---------|--------|---------|
| 1        | 22.896    | 607764  | 16242  | 50.441  |
| 2        | 27.986    | 597142  | 13376  | 49.559  |
| Total    |           | 1204906 | 29618  | 100.000 |

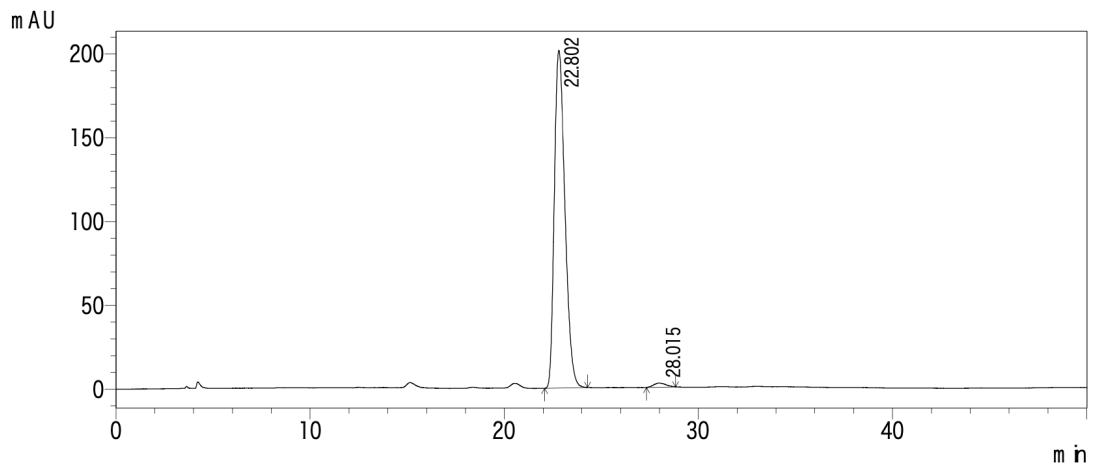

PDA Ch1 210nm

| Peak No. | RT (m in) | Area    | Height | % Area  |
|----------|-----------|---------|--------|---------|
| 1        | 22.802    | 7771706 | 201632 | 98.651  |
| 2        | 28.015    | 106277  | 2457   | 1.349   |
| Total    |           | 7877983 | 204088 | 100.000 |

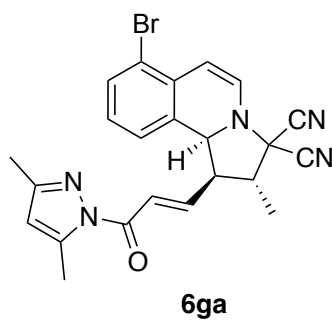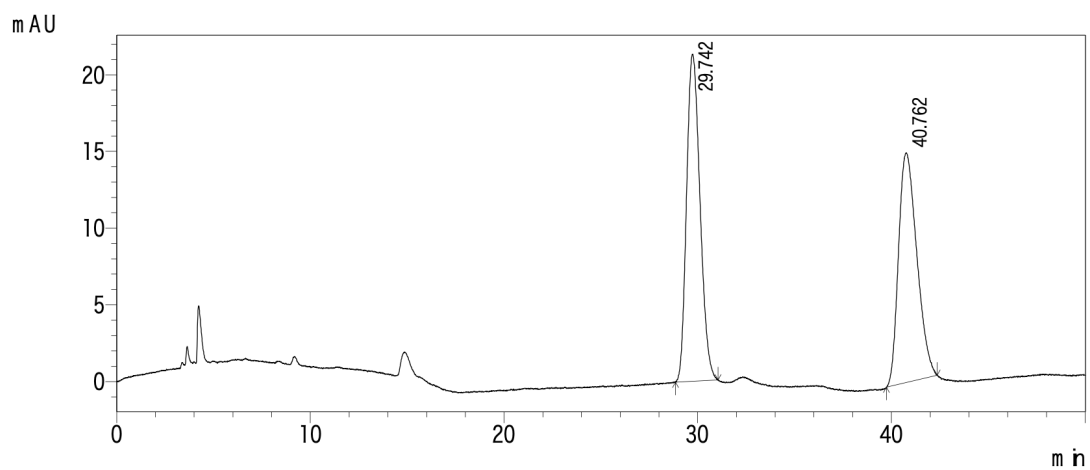

PDA Ch1 210nm

| Peak No. | RT (m in) | Area    | Height | % Area  |
|----------|-----------|---------|--------|---------|
| 1        | 29.742    | 1027719 | 21329  | 51.203  |
| 2        | 40.762    | 979440  | 14972  | 48.797  |
| Total    |           | 2007159 | 36300  | 100.000 |

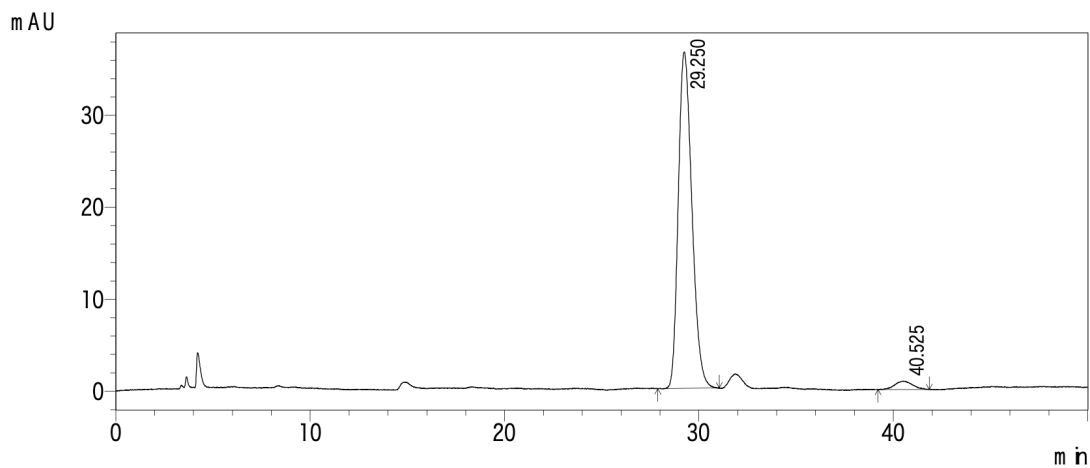

PDA Ch1 210nm

| Peak No. | RT (m in) | Area    | Height | % Area  |
|----------|-----------|---------|--------|---------|
| 1        | 29.250    | 1785635 | 36599  | 96.862  |
| 2        | 40.525    | 57839   | 920    | 3.138   |
| Total    |           | 1843475 | 37519  | 100.000 |

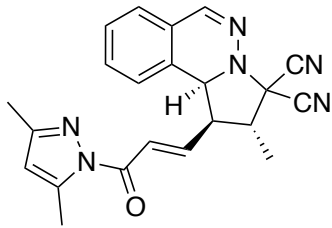

**6da**

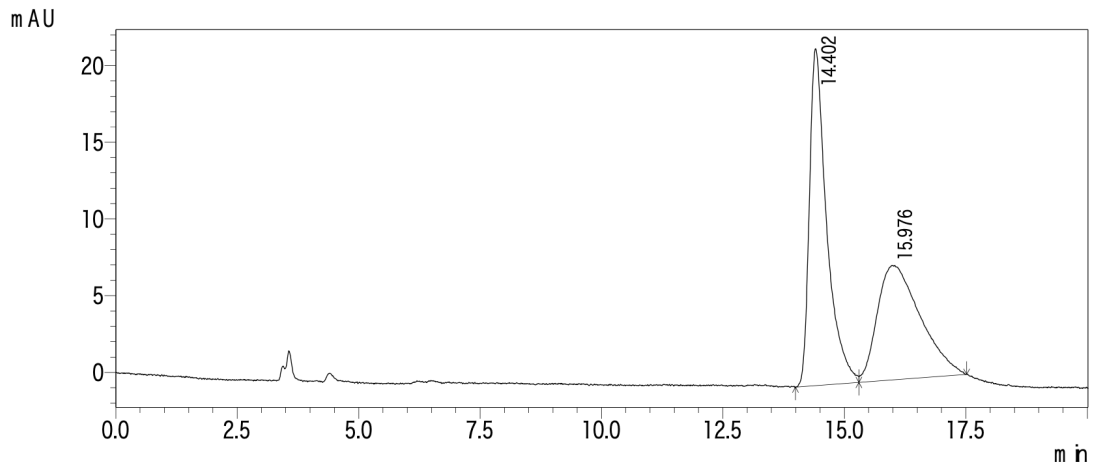

PDA Ch1 210nm

| Peak No. | RT (m in) | Area    | Height | % Area  |
|----------|-----------|---------|--------|---------|
| 1        | 14.402    | 544071  | 21973  | 54.240  |
| 2        | 15.976    | 459017  | 7472   | 45.760  |
| Total    |           | 1003089 | 29446  | 100.000 |

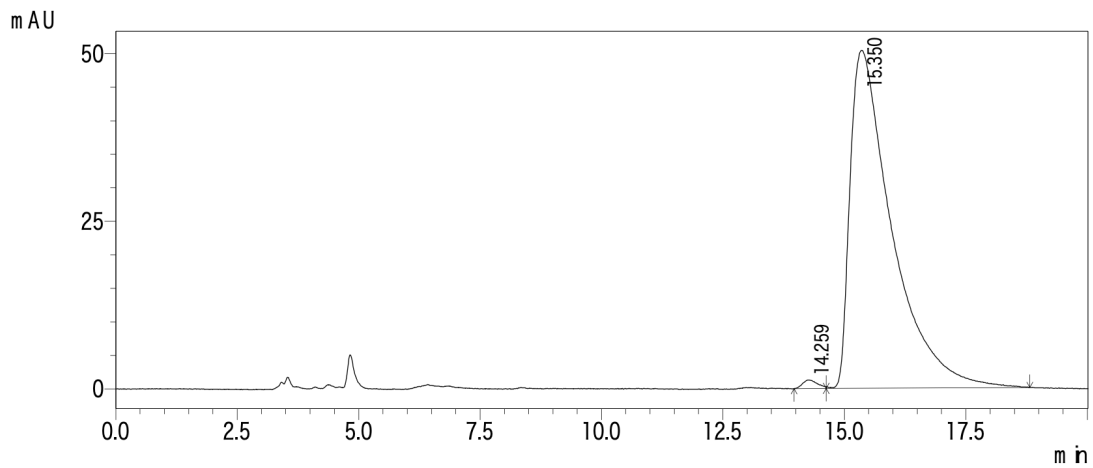

PDA Ch1 210nm

| Peak No. | RT (m in) | Area    | Height | % Area  |
|----------|-----------|---------|--------|---------|
| 1        | 14.259    | 27227   | 1277   | 0.894   |
| 2        | 15.350    | 3017240 | 50420  | 99.106  |
| Total    |           | 3044467 | 51697  | 100.000 |



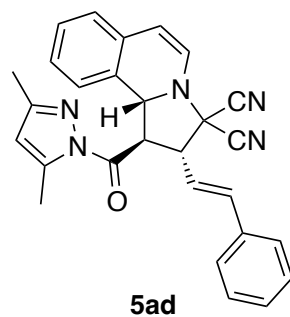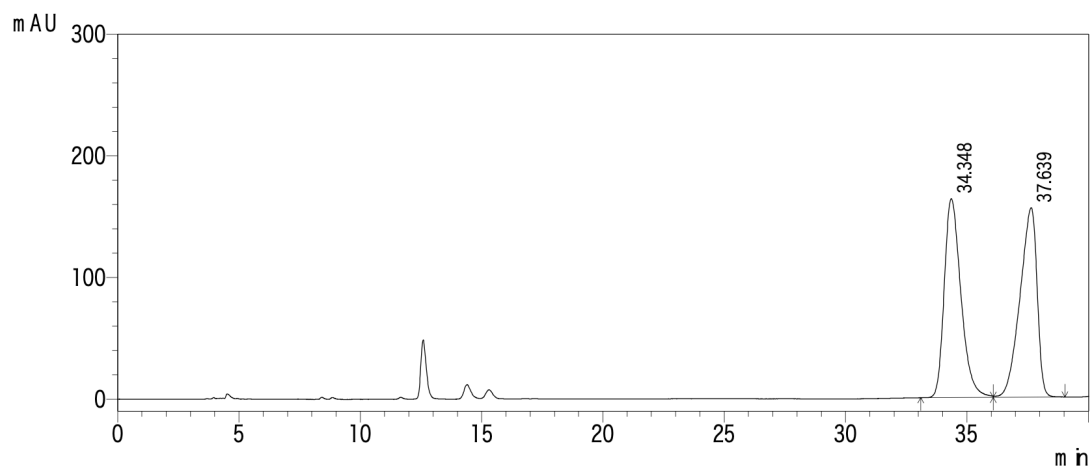

PDA Ch1 210nm

| Peak No. | RT (m in) | Area     | Height | % Area  |
|----------|-----------|----------|--------|---------|
| 1        | 34.348    | 7816607  | 163545 | 50.643  |
| 2        | 37.639    | 7618070  | 155663 | 49.357  |
| Total    |           | 15434677 | 319207 | 100.000 |

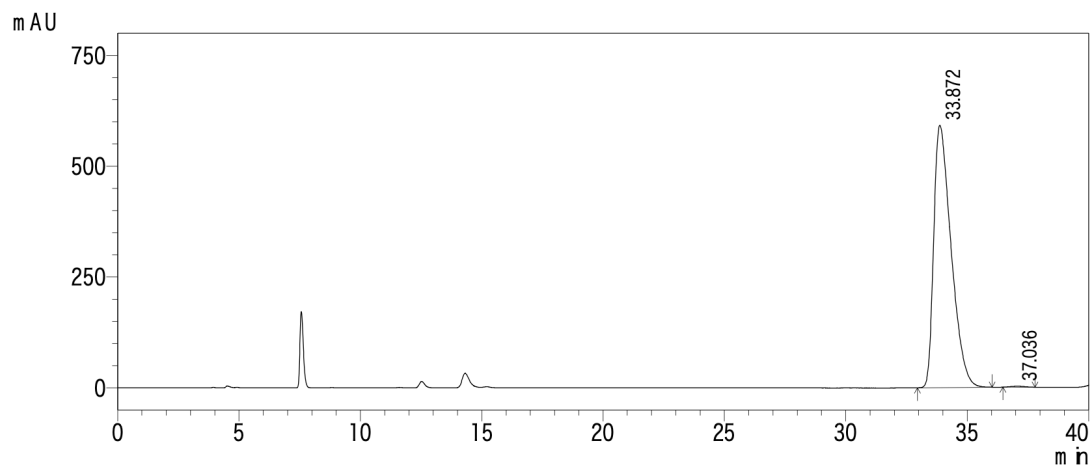

PDA Ch1 210nm

| Peak No. | RT (m in) | Area     | Height | % Area  |
|----------|-----------|----------|--------|---------|
| 1        | 33.872    | 29439297 | 591577 | 99.720  |
| 2        | 37.036    | 82765    | 2038   | 0.280   |
| Total    |           | 29522062 | 593615 | 100.000 |

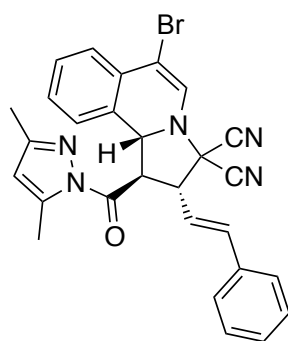

**5bd**

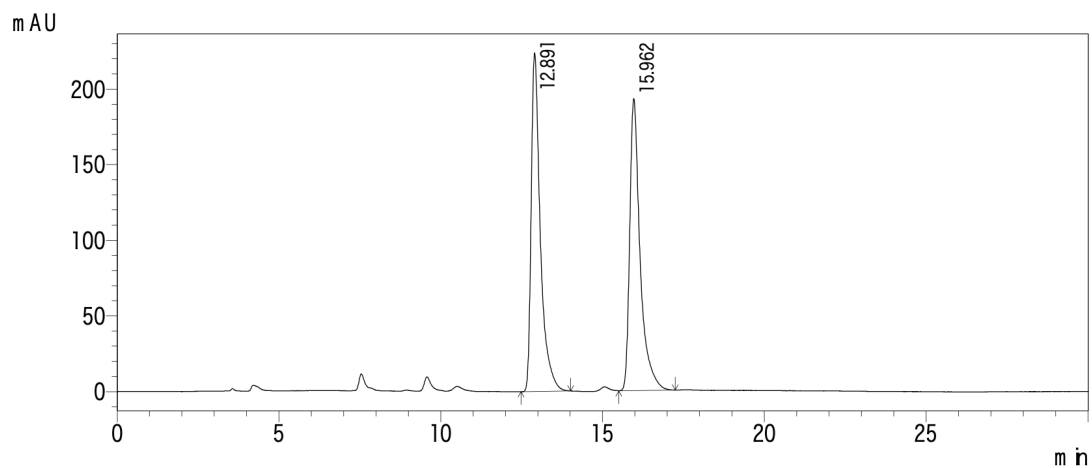

PDA Ch1 210nm

| Peak No. | RT (m in) | Area    | Height | % Area  |
|----------|-----------|---------|--------|---------|
| 1        | 12.891    | 4394647 | 223988 | 50.492  |
| 2        | 15.962    | 4309031 | 193255 | 49.508  |
| Total    |           | 8703678 | 417243 | 100.000 |

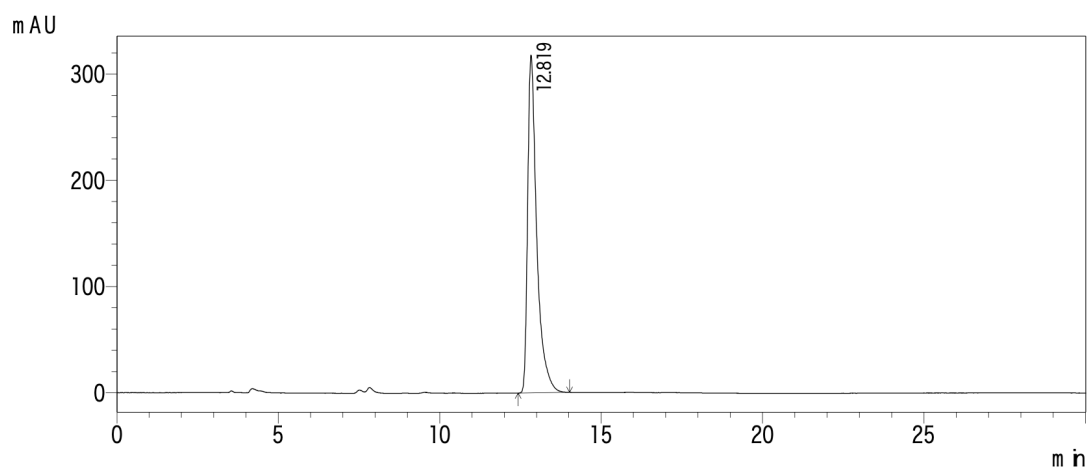

PDA Ch1 210nm

| Peak No. | RT (m in) | Area    | Height | % Area  |
|----------|-----------|---------|--------|---------|
| 1        | 12.819    | 6226496 | 318223 | 100.000 |
| Total    |           | 6226496 | 318223 | 100.000 |

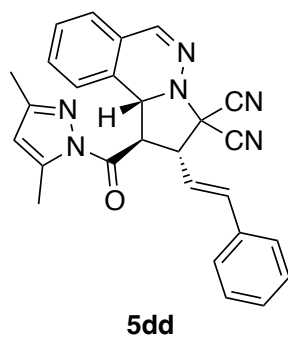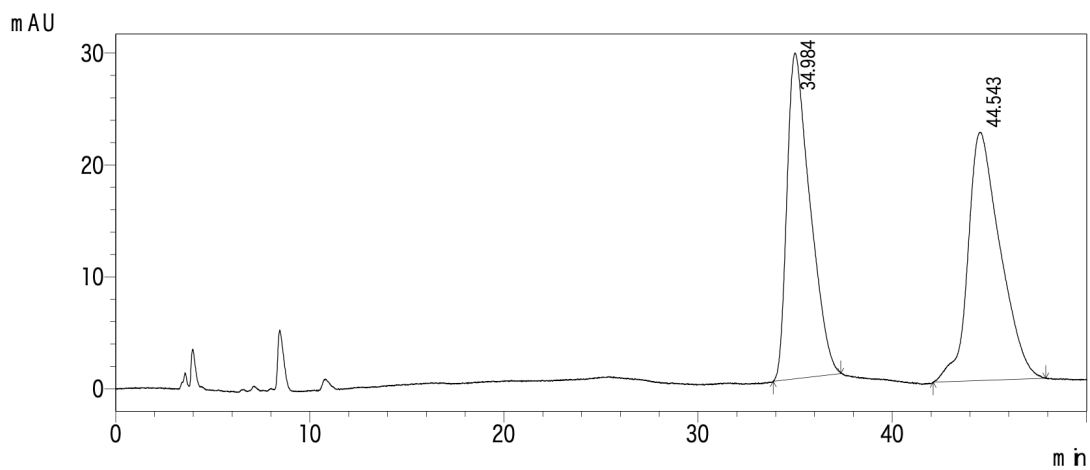

PDA Ch1 210nm

| Peak No. | RT (m in) | Area    | Height | % Area  |
|----------|-----------|---------|--------|---------|
| 1        | 34.984    | 2397820 | 29123  | 48.366  |
| 2        | 44.543    | 2559880 | 22185  | 51.634  |
| Total    |           | 4957699 | 51308  | 100.000 |

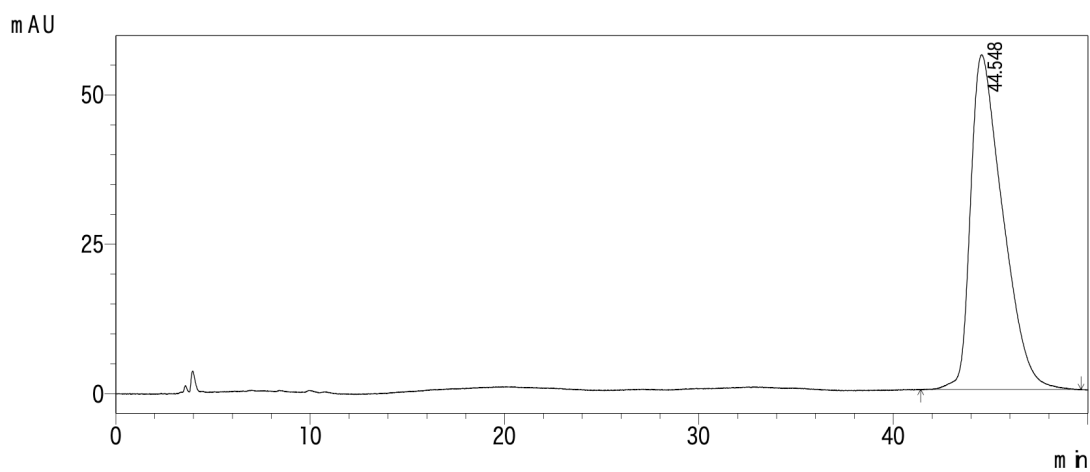

PDA Ch1 210nm

| Peak No. | RT (m in) | Area    | Height | % Area  |
|----------|-----------|---------|--------|---------|
| 1        | 44.548    | 6423436 | 55970  | 100.000 |
| Total    |           | 6423436 | 55970  | 100.000 |

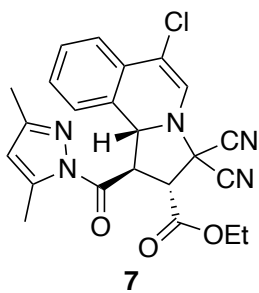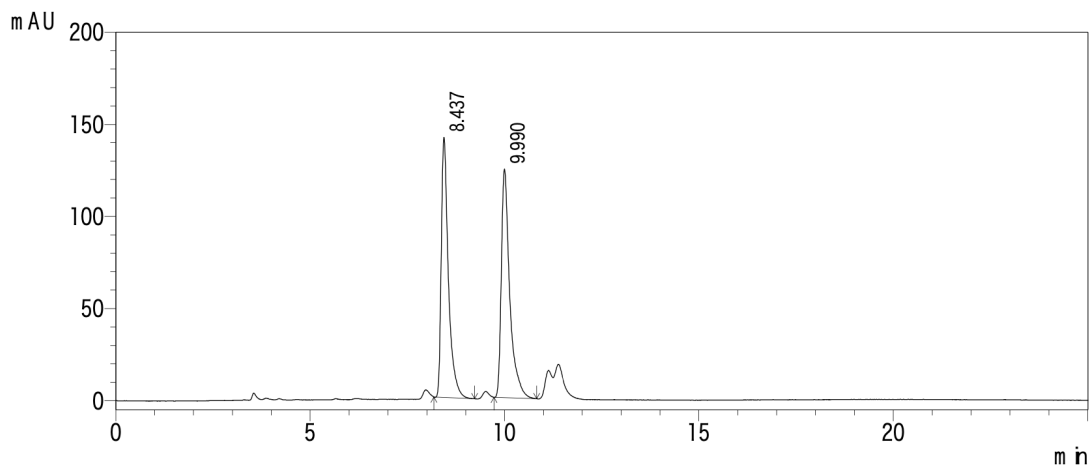

PDA Ch1 210nm

| Peak No. | RT (m in) | Area    | Height | % Area  |
|----------|-----------|---------|--------|---------|
| 1        | 8.437     | 1797892 | 141142 | 49.104  |
| 2        | 9.990     | 1863478 | 124144 | 50.896  |
| Total    |           | 3661370 | 265286 | 100.000 |

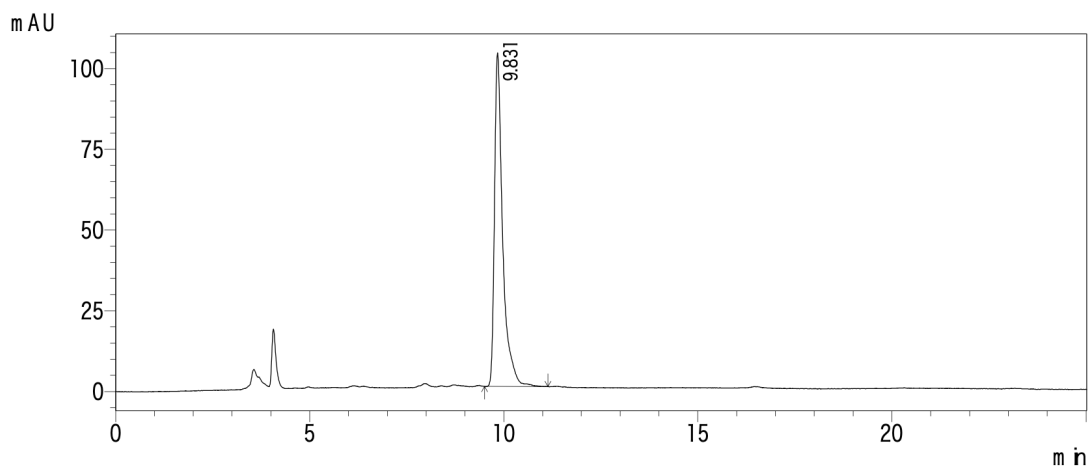

PDA Ch1 210nm

| Peak No. | RT (m in) | Area    | Height | % Area  |
|----------|-----------|---------|--------|---------|
| 1        | 9.831     | 1521802 | 103360 | 100.000 |
| Total    |           | 1521802 | 103360 | 100.000 |

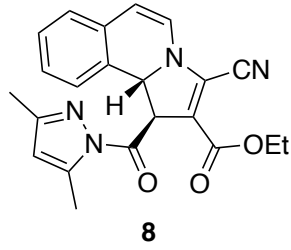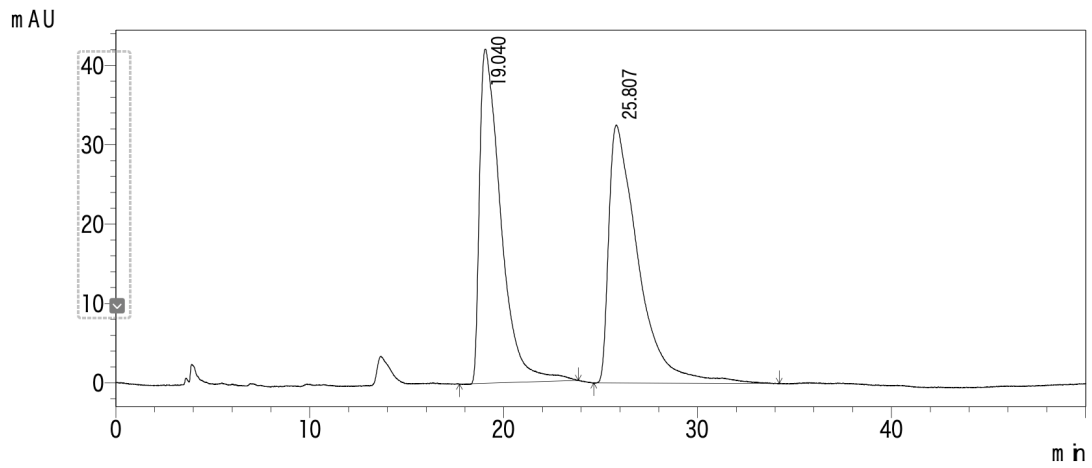

PDA Ch1 210nm

| Peak No. | RT (min) | Area    | Height | % Area  |
|----------|----------|---------|--------|---------|
| 1        | 19.040   | 3199498 | 42103  | 48.436  |
| 2        | 25.807   | 3406090 | 32514  | 51.564  |
| Total    |          | 6605588 | 74616  | 100.000 |

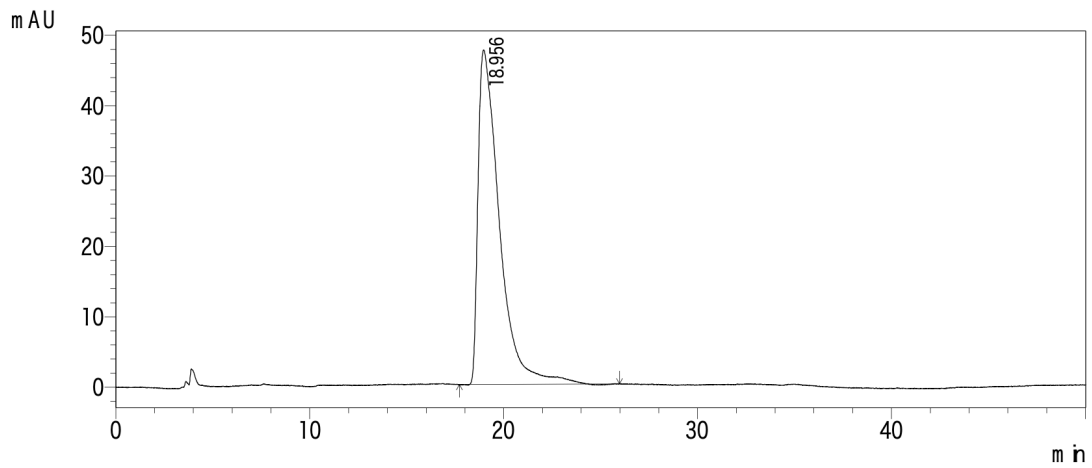

PDA Ch1 210nm

| Peak No. | RT (min) | Area    | Height | % Area  |
|----------|----------|---------|--------|---------|
| 1        | 18.956   | 3620323 | 47535  | 100.000 |
| Total    |          | 3620323 | 47535  | 100.000 |

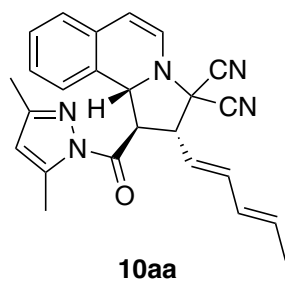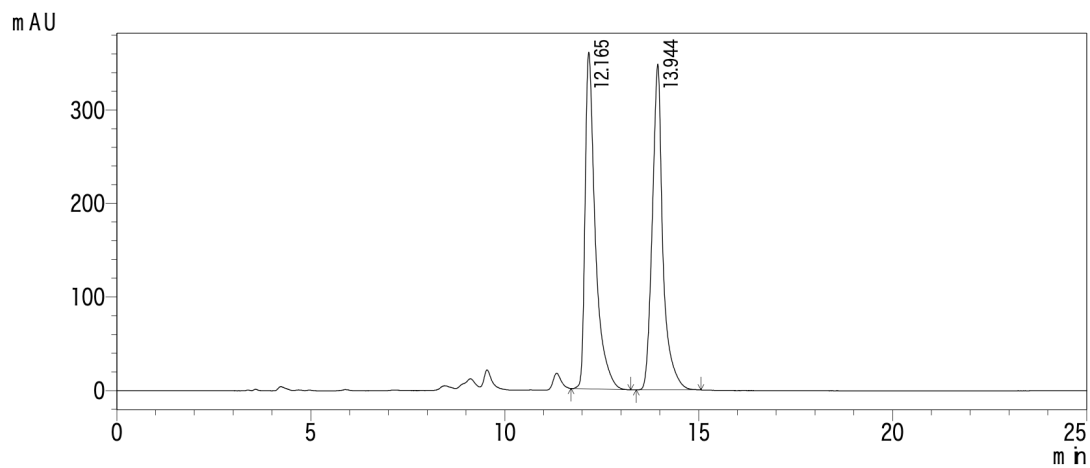

PDA Ch1 210nm

| Peak No. | RT (min) | Area     | Height | % Area  |
|----------|----------|----------|--------|---------|
| 1        | 12.165   | 6599670  | 360162 | 50.016  |
| 2        | 13.944   | 6595524  | 348259 | 49.984  |
| Total    |          | 13195194 | 708421 | 100.000 |

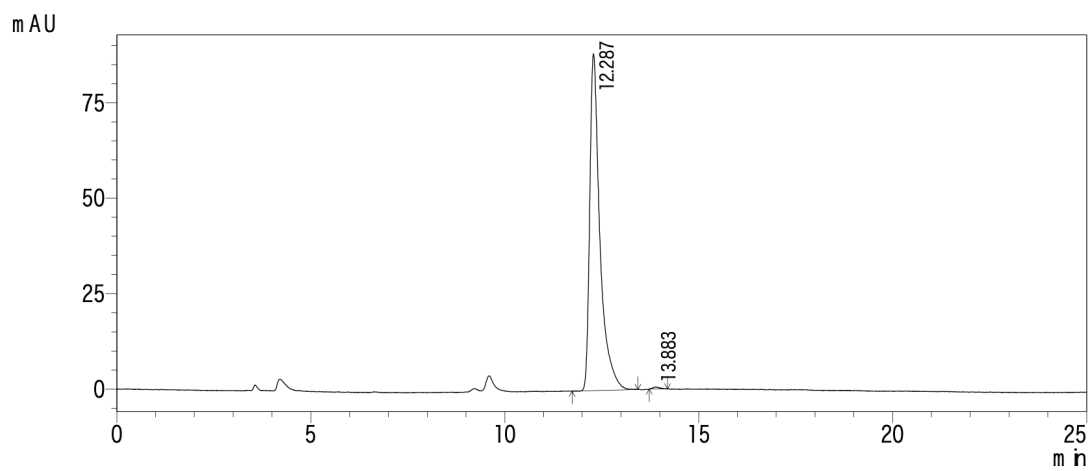

PDA Ch1 210nm

| Peak No. | RT (min) | Area    | Height | % Area  |
|----------|----------|---------|--------|---------|
| 1        | 12.287   | 1603065 | 88172  | 99.578  |
| 2        | 13.883   | 6788    | 505    | 0.422   |
| Total    |          | 1609853 | 88676  | 100.000 |

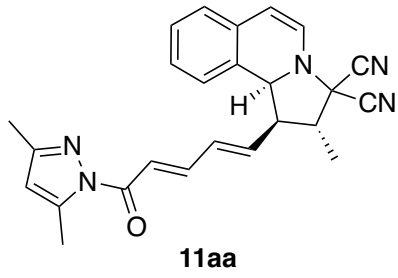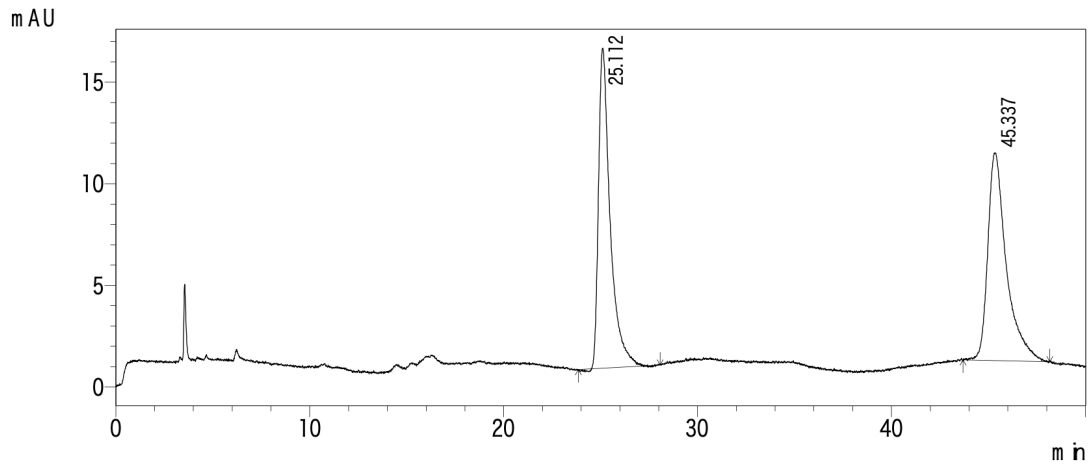

PDA Ch1 210nm

| Peak No. | RT (min) | Area    | Height | % Area  |
|----------|----------|---------|--------|---------|
| 1        | 25.112   | 655406  | 15755  | 49.034  |
| 2        | 45.337   | 681227  | 10222  | 50.966  |
| Total    |          | 1336633 | 25978  | 100.000 |

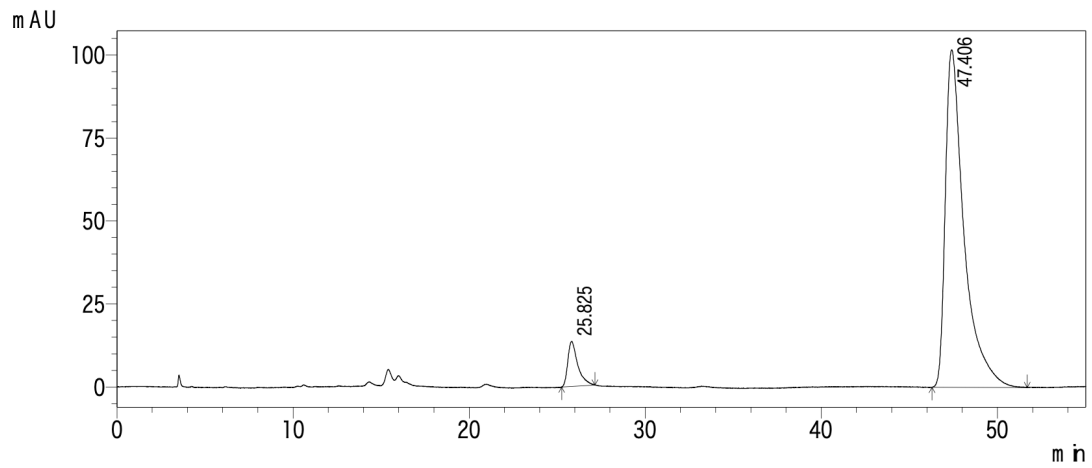

PDA Ch1 210nm

| Peak No. | RT (min) | Area    | Height | % Area  |
|----------|----------|---------|--------|---------|
| 1        | 25.825   | 532181  | 13552  | 6.613   |
| 2        | 47.406   | 7515079 | 101794 | 93.387  |
| Total    |          | 8047259 | 115346 | 100.000 |

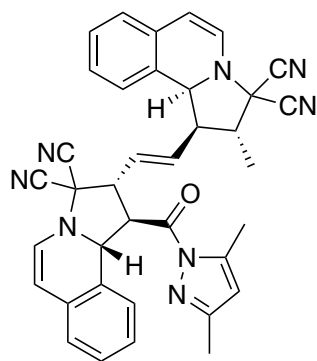

**12aa**

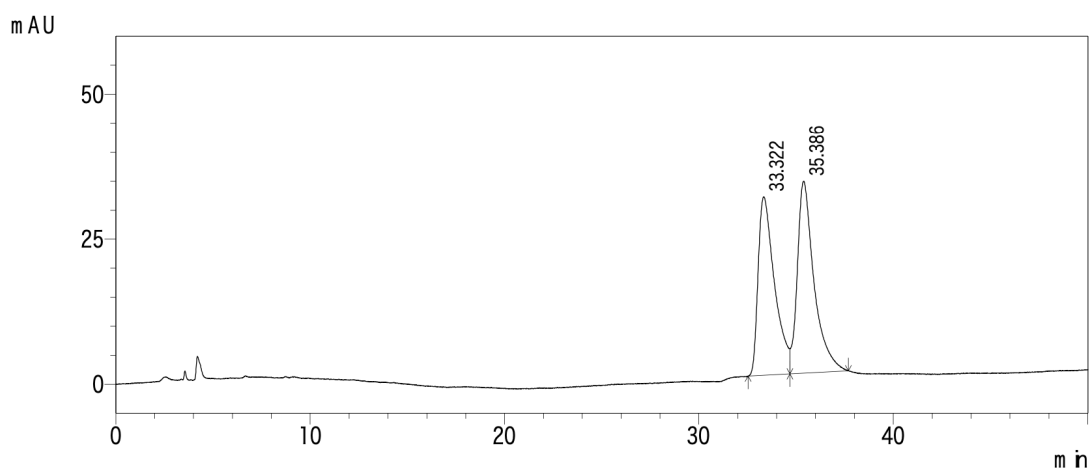

PDA Ch1 210nm

| Peak No. | RT (m in) | Area    | Height | % Area  |
|----------|-----------|---------|--------|---------|
| 1        | 33.322    | 1812397 | 30762  | 47.739  |
| 2        | 35.386    | 1984047 | 33088  | 52.261  |
| Total    |           | 3796445 | 63851  | 100.000 |

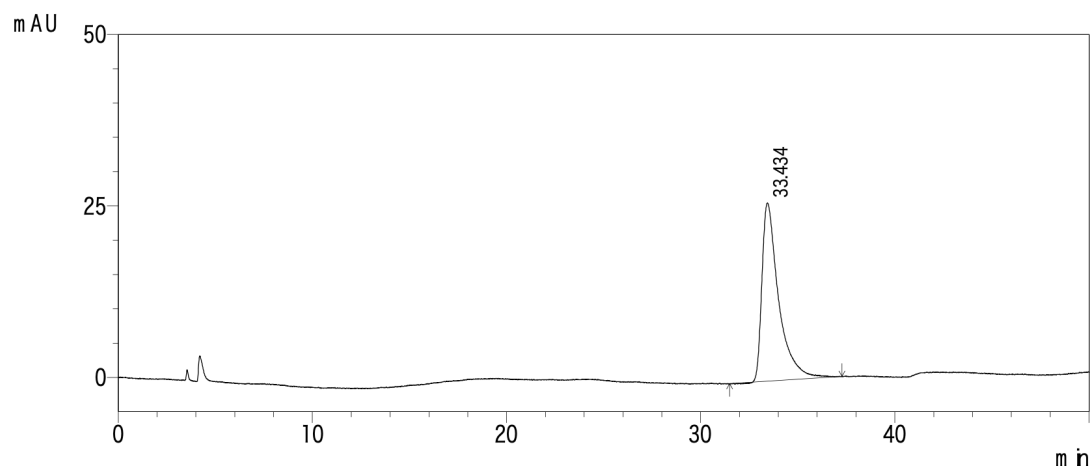

PDA Ch1 210nm

| Peak No. | RT (m in) | Area    | Height | % Area  |
|----------|-----------|---------|--------|---------|
| 1        | 33.434    | 1556931 | 26009  | 100.000 |
| Total    |           | 1556931 | 26009  | 100.000 |
